# Supplementary material for: An abrupt switch in magmatic plumbing taps porphyry copper deposit-forming magmas
Source: Research Square preprint supplement (doi:10.21203/rs.3.rs-608569/v1), 2021-06-24
Supplement: Supplementary file 1 [file 12c10edd5e0eaed70b586948.xlsx]

## Sheet: Sample list
	Sample details for zircon Lu-Hf isotope analysis
		WGS84
	Sample	Lat	Long	Drill hole	From	To	Unit	Notes
	AM63A	38.9774	-119.236				Aplite dyke	Mineralised aplite dyke, with miarolitic cavities
	MA9	39.0413	-119.242				Bear QM, inner
	BH10	39.0107	-119.293				Bear QM, outer
	AM18LHG	38.9766	-119.23				LHG, upper
	LH24S	38.9566	-119.104				LHG, deep	Sample from palaeo-deepest exposure of LHG (~7.5 km; Dilles, 1987)
	AM4QMD	38.9612	-119.231				McLeod QMD, inner
	AM72	38.9741	-119.259				McLeod QMD, outer
	AC25			EG-AM-13-036	564.34 m	564.63 m	Porphyry dyke, Ann Mason deposit	Mason drill core: 'QMPD' (late) dyke cutting LHG

## Sheet: Results
	OWNER_SAMPLE_LABEL	GTF_PART_LABEL		176Lu/177Hf	176Hf/177Hf_N	± 2SE	Hf_IR	Epsilon_HF(t @ID-TIMSU-Pb)	± 2s		176Hf/177Hf_Hf	± 2SE	Hf176/Hf177_cYb	± 2SE	176Yb/177Hf	± 2SE	178Hf/177Hfc	± 2SE	179Hf/177Hfm	± 2SE	180Hf/177Hfc	± 2SE
	AM18LHG	z13		0.000829	0.282924	8e-06	0.282921	8.5476	0.473716		0.282914	8e-06	0.282938	1.1e-05	0.016882	3.7e-05	1.46726	1.6e-05	0.744152	1.1e-05	1.88687	3.6e-05
	AM18LHG	z12A		0.000589	0.282918	9e-06	0.282916	8.36194	0.49566		0.282908	9e-06	0.282926	2.2e-05	0.012204	7e-06	1.46724	2.3e-05	0.744409	1.8e-05	1.8869	7.3e-05
	AM18LHG	z14		0.000543	0.282914	1e-05	0.282912	8.22553	0.519089		0.282904	1e-05	0.28291	1.7e-05	0.011342	7e-06	1.46724	2.1e-05	0.744462	1.5e-05	1.88682	4.7e-05
	AM18LHG	z15		0.001046	0.282931	1.3e-05	0.282928	8.77119	0.596499		0.282921	1.3e-05	0.282936	2e-05	0.024459	1.1e-05	1.46725	2.2e-05	0.744392	1.6e-05	1.88682	5e-05
	AM18LHG	z11		0.000764	0.282928	9e-06	0.282926	8.69631	0.495668		0.282918	9e-06	0.282945	1.3e-05	0.017146	7e-06	1.46725	2e-05	0.744355	1.2e-05	1.88684	4.7e-05
	AM72	z1		0.000695	0.282915	8e-06	0.282913	8.26811	0.473662		0.282905	8e-06	0.28294	1.2e-05	0.016859	4e-06	1.46725	1.5e-05	0.744363	1.2e-05	1.88679	3.5e-05
	AM72	z4		0.001056	0.282941	1.7e-05	0.282938	9.14762	0.711302		0.282931	1.7e-05	0.282938	4.3e-05	0.026232	1.3e-05	1.46724	3.4e-05	0.744413	2.6e-05	1.88678	8.8e-05
	AM72	z9		0.000918	0.282887	1.1e-05	0.282884	7.25272	0.543742		0.282877	1.1e-05	0.282866	3.1e-05	0.022286	1.1e-05	1.4673	2.8e-05	0.744352	2.5e-05	1.88692	6.8e-05
	AM72	z11		0.000724	0.282884	1.2e-05	0.282882	7.16822	0.569595		0.282874	1.2e-05	0.282874	1.2e-05	0.018113	6e-06	1.46728	3.3e-05	0.744318	1.7e-05	1.88693	6.7e-05
	AM72	z10		0.001234	0.282905	1e-05	0.282901	7.85424	0.519026		0.282895	1e-05	0.282912	1.8e-05	0.030312	7e-06	1.46726	2.3e-05	0.744372	1.5e-05	1.88693	5.4e-05
	MA9	z10		0.00064	0.282883	1.4e-05	0.282881	7.1247	0.624136		0.282873	1.4e-05	0.282873	1.4e-05	0.01597	9e-06	1.46723	2.4e-05	0.744377	2.8e-05	1.88688	8.1e-05
	MA9	z2		0.000679	0.282935	1.3e-05	0.282933	8.95991	0.596498		0.282925	1.3e-05	0.282902	2.6e-05	0.016567	6e-06	1.46724	2.8e-05	0.744468	2.3e-05	1.88674	6.4e-05
	MA9	z7		0.000639	0.282917	1e-05	0.282915	8.32759	0.519079		0.282907	1e-05	0.282915	1.4e-05	0.015059	8e-06	1.46724	2.1e-05	0.744441	1.5e-05	1.88679	4.3e-05
	MA9	z9		0.00049	0.282911	6e-06	0.282909	8.13187	0.43514		0.282901	6e-06	0.282909	8e-06	0.011081	2e-06	1.46723	1.2e-05	0.743697	1.4e-05	1.88686	3.5e-05
	MA9	z8		0.000633	0.282931	1.1e-05	0.282929	8.82352	0.543817		0.282921	1.1e-05	0.282931	1.8e-05	0.015924	4e-06	1.46728	2e-05	0.743216	3.6e-05	1.88689	5.7e-05
	AC25	z12		0.000982	0.282886	9e-06	0.282883	7.19071	0.495612		0.282876	9e-06	0.282882	1.4e-05	0.021649	4e-06	1.46725	1.6e-05	0.744203	1.3e-05	1.88686	3.2e-05
	AC25	z10		0.000573	0.282919	6e-06	0.282917	8.40347	0.435152		0.282909	6e-06	0.282913	9e-06	0.012732	5e-06	1.46726	1.5e-05	0.744149	1.5e-05	1.88684	3.2e-05
	AC25	z11		0.00066	0.282913	5e-06	0.282911	8.18157	0.419028		0.282902	5e-06	0.282921	6e-06	0.014969	3e-06	1.46725	1.1e-05	0.74397	1.1e-05	1.88683	3e-05
	AC25	z9		0.000406	0.282925	4e-06	0.282924	8.63425	0.405386		0.282915	4e-06	0.282925	5e-06	0.008404	1e-06	1.46724	1.2e-05	0.744061	7e-06	1.88679	1.9e-05
	AC25	z8		0.000577	0.282924	1.1e-05	0.282922	8.57991	0.543815		0.282914	1.1e-05	0.282899	1.3e-05	0.013916	5e-06	1.46729	2.1e-05	0.744242	1.9e-05	1.88678	5.2e-05
	BH10	z1		0.000915	0.282891	6e-06	0.282888	7.40975	0.435038		0.282881	6e-06	0.282907	1.1e-05	0.023226	4e-06	1.46724	1.6e-05	0.744154	1.1e-05	1.88679	2.6e-05
	BH10	z2Tip		0.001246	0.282913	5e-06	0.282909	8.15095	0.418938		0.282903	5e-06	0.282914	7e-06	0.031392	4e-06	1.46725	9e-06	0.743949	9e-06	1.88678	2e-05
	BH10	z4		0.000974	0.282902	7e-06	0.282899	7.79228	0.453362		0.282892	7e-06	0.282915	1e-05	0.024371	4e-06	1.46726	1.4e-05	0.743943	1.3e-05	1.88684	3.6e-05
	BH10	z8		0.001144	0.282889	7e-06	0.282885	7.31336	0.453344		0.282879	7e-06	0.282903	1.3e-05	0.028925	4e-06	1.46723	1.4e-05	0.743973	9e-06	1.88681	2.7e-05
	AM4QMD	z7		0.000586	0.282917	1.2e-05	0.282915	8.33347	0.569655		0.282907	1.2e-05	0.282942	2e-05	0.01414	5e-06	1.46723	2.4e-05	0.744054	1.3e-05	1.88681	4.7e-05
	AM4QMD	z3		0.000605	0.282915	1.1e-05	0.282913	8.26061	0.543803		0.282905	1.1e-05	0.282889	1.6e-05	0.014905	4e-06	1.46725	2.3e-05	0.743895	1.7e-05	1.88689	5.9e-05
	AM4QMD	z12		0.00068	0.282901	9e-06	0.282899	7.75703	0.495629		0.282891	9e-06	0.2829	1.3e-05	0.016435	6e-06	1.46724	1.6e-05	0.744109	1.6e-05	1.88681	4.4e-05
	AM4QMD	z9		0.001136	0.282865	1.8e-05	0.282861	6.43289	0.74142		0.282855	1.8e-05	0.282836	2.9e-05	0.025161	1.1e-05	1.46728	3.4e-05	0.744126	2.8e-05	1.88692	7.6e-05
	AM4QMD	z2		0.000389	0.282915	5e-06	0.282914	8.28458	0.419031		0.282905	5e-06	0.282909	7e-06	0.009023	2e-06	1.46725	1.2e-05	0.743985	1.1e-05	1.88682	2.6e-05
	LH24S	z4		0.000432	0.282916	5e-06	0.282915	8.31078	0.419041		0.282906	5e-06	0.282912	7e-06	0.008903	2e-06	1.46724	1.4e-05	0.74399	1e-05	1.88684	2.7e-05
	LH24S	z5		0.001023	0.282917	3e-06	0.282914	8.28065	0.394414		0.282907	3e-06	0.282933	5e-06	0.028926	4e-06	1.46725	8e-06	0.743846	7e-06	1.88681	1.8e-05
	LH24S	z2B		0.000485	0.282919	4e-06	0.282917	8.41103	0.405382		0.282909	4e-06	0.282914	6e-06	0.010654	1e-06	1.46724	9e-06	0.743971	7e-06	1.8868	1.7e-05
	LH24S	z2A		0.000464	0.282925	6e-06	0.282924	8.62561	0.435166		0.282915	6e-06	0.282926	7e-06	0.010797	2e-06	1.46725	1.4e-05	0.743913	1.1e-05	1.88685	3e-05
	LH24S	z7		0.000487	0.282922	5e-06	0.28292	8.51694	0.419047		0.282912	5e-06	0.28292	6e-06	0.011232	2e-06	1.46725	1e-05	0.74403	7e-06	1.8868	2e-05
	AM63a	z9A		0.000592	0.282913	7e-06	0.282911	8.18652	0.453459		0.282903	7e-06	0.282925	9e-06	0.012125	4e-06	1.46723	1.5e-05	0.744128	1.1e-05	1.88684	3.2e-05
	AM63a	z10		0.000712	0.282933	1.4e-05	0.282931	8.88074	0.624183		0.282923	1.4e-05	0.28295	2.4e-05	0.015337	5e-06	1.46728	2.5e-05	0.744245	2.1e-05	1.88684	6.1e-05
	AM63a	z7		0.000474	0.282917	5e-06	0.282916	8.3411	0.419042		0.282907	5e-06	0.282918	7e-06	0.010208	2e-06	1.46725	1.1e-05	0.744202	7e-06	1.8868	2.2e-05
	AM63a	z5(?)		0.000432	0.282922	6e-06	0.282921	8.52264	0.435164		0.282912	6e-06	0.282937	9e-06	0.008322	2e-06	1.46725	1.7e-05	0.744252	9e-06	1.88681	2.8e-05
	AM63a	z19(?)		0.000587	0.282922	7e-06	0.28292	8.50546	0.453469		0.282912	7e-06	0.282927	1.2e-05	0.012342	3e-06	1.46727	2e-05	0.744306	1.3e-05	1.88688	4.1e-05

## Sheet: WM and Overdispersion
	Sample	Interpreted unit age, CA-ID-TIMS	2s	WM	95%CI	95%CI with over dispersion	MSWD	p
	BH10	169.116	0.041	7.67	0.35	0.61	2.97	0.031
	Am72	168.433	0.047	7.83	0.34	0.89	6.87	1.6e-05
	QMD4	167.58	0.042	7.99	0.32	0.81	6.56	2.9e-05
	MA9	167.59	0.044	8.27	0.31	0.8	6.59	2.7e-05
	AC25	167.44	0.039	8.25	0.268	0.648	5.82	0.00011
	AM18LHG	167.275	0.027	8.5	0.32	0.29	0.81	0.52
	LH24S	167.365	0.041	8.42	0.248	0.162	0.42	0.79
	AM63a	167.282	0.04	8.44	0.29	0.28	0.98	0.42
