# Supplementary material for: An abrupt switch in magmatic plumbing taps porphyry copper deposit-forming magmas
Source: Research Square preprint supplement (doi:10.21203/rs.3.rs-608569/v1), 2021-06-24
Supplement: Supplementary file 2 [file 448d39efe6ad77de51172f84.xlsx]

## Sheet: Sample list 
	Sample details for zircon LA-ICP-MS
		WGS84
	Sample	Lat	Long	Unit	Drill hole	From	To	Notes
	AM13BAP	38.9774	-119.238	Aplite dyke				Aplite dyke hosting mineralised miaroloitc cavities cutting porphyry dyke and LHG cupola
	AM18A	38.9766	-119.23	Aplite dyke				Aplite dyke cutting LHG cupola
	AM54A	38.9794	-119.237	Aplite dyke				Mineralised aplite dyke, with miarolitic cavities. Mingling realtionship with porphyry dyke
	AM63A	38.9774	-119.236	Aplite dyke				Mineralised aplite dyke, with miarolitic cavities
	BS15	39.0712	-119.348	Artesia volcanics
	MA9	39.0413	-119.242	Bear QM, inner
	BH10	39.0107	-119.293	Bear QM, outer
	BS1	39.0246	-119.362	Fulstone volcanics
	BS10	39.0659	-119.366	Fulstone volcanics
	BS16	39.0735	-119.406	Fulstone volcanics
	AM6B	38.9651	-119.233	LHG dyke				LHG dyke at LHG-McLeod QMD contact.
	AM13LHG	38.9774	-119.238	LHG, upper
	AM18LHG	38.9766	-119.23	LHG, upper
	LH24S	38.9566	-119.104	LHG, deep				Sample from palaeo-deepest exposure of LHG (Dilles, 1987)
	AM4QMD	38.9612	-119.231	McLeod QMD, inner
	AM72	38.9741	-119.259	McLeod QMD, outer
	AM4DYKE	38.9612	-119.231	Porphyry dyke				Porphyry dyke cutting LHG cupola
	AM13BE	38.9774	-119.238	Porphyry dyke				Porphyry dyke cutting LHG cupola
	AM13BPOR	38.9774	-119.238	Porphyry dyke				Porphyry dyke cutting LHG cupola
	AM22	38.9786	-119.24	Porphyry dyke				Porphyry dyke cutting LHG cupola
	AM54P	38.9794	-119.237	Porphyry dyke				Porphry dye with mingling contacts with mineralised aplite dyke.
	AC22			Porphyry dyke	EG-AM-11-011	517.80 m	518.10 m	Mason drill core: 'QMPA' (early) dyke cutting LHG
	AC25			Porphyry dyke	EG-AM-13-036	564.34 m	564.63 m	Mason drill core: 'QMPD' (late) dyke cutting LHG
	YM42			Porphyry dyke	M-15	36 ft	37 ft	Yerington dill core: 'QMP 1' (early, after Proffett; 2008) cutting Bear QM
	YM43			Porphyry dyke	P+100-25	100 ft	101 ft	Yerington dill core: 'QMP 3' (late, after Proffett; 2008) cutting Bear QM

## Sheet: LA-ICP-MS results
Sample #	Core or Rim	STRING	Date	LAICPMS file name	Laser spot number	Spot size (μm)	Frequency (Hz)	Fluence (J/cm2)	207Pb/235U	207Pb/235U _2s.	206Pb/238U	206Pb/238U_2s.	Rho	207Pb/206Pb	207Pb/206Pb_2s.	Date_207Pb/235U (Ma)	Date_207Pb/235U_2s. (Ma)	Date_206Pb/238U (Ma)	Date_206Pb/238U_2s. (Ma)	Date_207Pb/206Pb (Ma)	Date_207Pb/206Pb_2s. (Ma)	Al27_ppm	Si28_ppm	P31_ppm	Ca43_ppm	Ti49_ppm	V51_ppm	Fe57_ppm	Y89_ppm	Zr91_ppm	Nb93_ppm	Mo95_ppm	Ba137_ppm	La139_ppm	Ce140_ppm	Pr141_ppm	Nd145_ppm	Sm147_ppm	Eu151_ppm	Gd157_ppm	Tb159_ppm	Dy163_ppm	Ho165_ppm	Er167_ppm	Tm169_ppm	Yb173_ppm	Lu175_ppm	Hf177_ppm	Ta181_ppm
AM18	CORE	AM18 CORE	190502	190502_006_LC001	LC001	30	10	3.5	0.25	0.055	0.02543	0.00088	0.6655	0.07	0.013	224	41	161.9	5.5	790	310	4.06	153000	135	<96	7.1	4.07	41	1362	407000	2.36	6.04	0.52	0.311	84.7	0.226	2.77	6.49	2.98	34.4	10.01	114.4	41.8	211	43.9	421	91	9240	0.38
AM18	RIM	AM18 RIM	190502	190502_007_LC002	LC002	30	10	3.5	0.182	0.01	0.02503	0.00047	0.26151	0.0521	0.0028	170	8.7	159.3	2.9	270	120	3.8	153000	68	<71	3.15	0.77	19.5	301.4	426100	0.932	2.41	0.23	0.63	27.8	0.25	1.45	1.22	0.731	5.91	1.73	20.29	8.07	45.3	10.68	118.1	31	9750	0.154
AM18	CORE	AM18 CORE	190502	190502_008_LC003	LC003	30	10	3.5	0.194	0.018	0.02696	0.00081	0.20732	0.0513	0.0047	179	15	171.5	5.1	210	190	23	153000	105.5	<67	4.83	0.236	8.7	724	445000	0.769	2.59	0.17	0.0136	18.95	0.118	2.44	4.67	1.47	20.5	5.7	64.3	22.5	110.4	23.62	220	43.9	10030	0.212
AM18	RIM	AM18 RIM	190502	190502_009_LC004	LC004	30	10	3.5	0.209	0.022	0.0277	0.0013	0.017562	0.0538	0.0054	192	18	176.4	7.9	310	210	6.3	153000	63.8	<76	3.66	0.119	<6.2	272	487000	0.72	2.44	0.19	0.0076	16.5	0.0296	0.58	1.15	0.468	5.04	1.47	18.7	7.34	39.2	10.5	115	25.1	10220	0.166
AM18	CORE	AM18 CORE	190502	190502_011_LC005	LC005	30	10	3.5	0.176	0.014	0.02823	0.00074	0.054138	0.0445	0.0037	168	14	179.4	4.6	-20	190	1.56	153000	417	<78	5.78	0.186	8.9	391	422000	0.728	2.29	<0.067	0.35	12.71	0.169	1.4	1.94	0.504	8.93	2.73	32.5	12	61.7	13.94	132.1	28.5	10010	0.251
AM18	RIM	AM18 RIM	190502	190502_012_LC006	LC006	30	10	3.5	0.181	0.01	0.02787	0.00088	0.02899	0.0466	0.003	168.7	8.6	177.2	5.5	20	130	1.8	153000	62.5	<64	3.72	0.161	11.1	305	444000	0.843	2.62	<0.047	0.069	18.7	0.0385	0.63	1.13	0.553	5.8	1.64	20.8	8.7	47.7	12.19	127.2	29.3	9940	0.196
AM18	CORE	AM18 CORE	190502	190502_013_LC007	LC007	30	10	3.5	0.185	0.0088	0.02665	0.00064	0.21149	0.0502	0.0025	172	7.5	169.6	4	170	100	1.3	153000	149	<53	6.86	0.335	6.5	614	446000	1.313	2.24	<0.041	0.0083	19.9	0.0712	1.34	2.98	0.811	14	4.3	51.7	19.2	98.1	21.53	216	44.8	10340	0.469
AM18	RIM	AM18 RIM	190502	190502_014_LC008	LC008	30	10	3.5	0.209	0.013	0.0278	0.0012	0.131	0.0539	0.0037	192	11	177	7.3	340	150	49.8	153000	63.6	<72	4.89	2.43	194	351	460000	1.68	4.31	0.47	0.72	38.8	0.292	2.33	2.8	0.98	10.8	2.81	30.9	10.9	54.7	12.6	129	27	10960	0.34
AM18	CORE	AM18 CORE	190502	190502_016_LC009	LC009	30	10	3.5	0.1793	0.0088	0.02606	0.00053	0.3634	0.0492	0.0023	167.1	7.6	165.8	3.3	135	97	1.22	153000	103.4	<53	5.87	0.144	8	1210	434000	0.947	2.26	<0.057	0.439	77.4	1.69	18.6	17.4	7.86	48.2	10.13	98.8	34.6	166	36.6	371	83.9	7850	0.127
AM18	RIM	AM18 RIM	190502	190502_017_LC010	LC010	30	10	3.5	0.183	0.014	0.0277	0.0011	0.15318	0.0475	0.0037	170	12	176.1	7	50	160	0.45	153000	58.6	<60	3.7	0.058	6.7	338	438000	0.761	2.67	<0.035	0.0044	19	0.0417	0.86	1.71	0.8	7.83	2.09	25	9.58	50.6	12.41	131.8	29.5	9680	0.151
AM18	CORE	AM18 CORE	190502	190502_018_LC011	LC011	30	10	3.5	0.1799	0.0076	0.02622	0.00055	0.29232	0.049	0.002	167.8	6.6	166.8	3.5	136	90	<0.3	153000	417	<58	5.47	0.243	<5.3	1162	427000	2.34	2.3	<0.032	<0.0029	49.1	0.0671	1.4	4.54	1.1	24.2	7.9	97.3	35.83	178	39.4	379	73.8	9470	0.603
AM18	RIM	AM18 RIM	190502	190502_019_LC012	LC012	30	10	3.5	0.195	0.011	0.02678	0.00075	0.14249	0.0531	0.0033	180	9	170.3	4.7	280	130	0.28	153000	70.7	<61	4.07	0.158	<5.4	270.1	422000	0.819	2.17	<0.058	<0.0022	14.9	0.0173	0.49	1.04	0.357	5.46	1.695	21.14	8.03	42.1	9.94	99.2	21.82	10500	0.241
AM18	CORE	AM18 CORE	190502	190502_021_LC013	LC013	30	10	3.5
AM18	RIM	AM18 RIM	190502	190502_022_LC014	LC014	30	10	3.5	0.205	0.01	0.0269	0.0014	0.17523	0.0552	0.0041	192	10	171.3	8.8	380	160	85	153000	33	<77	2.87	1.43	366	170.7	481000	0.689	2.7	0.33	0.323	18.5	0.171	1.19	0.92	0.93	3.16	0.891	10.48	4.41	25	6.27	80	20.17	12400	0.137
AM18	CORE	AM18 CORE	190502	190502_023_LC015	LC015	30	10	3.5	0.193	0.019	0.02689	0.00061	0.24161	0.0515	0.005	177	16	171.1	3.9	190	190	2.52	153000	167.6	<56	13.11	0.275	<4.9	366	453000	0.843	2.29	<0.049	<0.0031	12.03	0.0447	0.84	1.94	0.679	9.45	2.76	31.6	11.31	54.1	11.9	115.1	23.79	8900	0.24
AM18	RIM	AM18 RIM	190502	190502_024_LC016	LC016	30	10	3.5	0.203	0.013	0.02759	0.0007	0.22023	0.0527	0.0034	187	11	175.4	4.4	260	140	0.29	153000	41.1	<50	3.04	0.088	<4.9	193.5	428000	0.682	2.21	<0.048	<0.0031	13.27	0.0179	0.366	0.74	0.287	3.74	1.12	14.13	5.65	30.1	7.34	79.3	19.2	10140	0.155
AM18	CORE	AM18 CORE	190502	190502_026_LC017	LC017	30	10	3.5	0.2064	0.0087	0.02711	0.00095	0.51772	0.0547	0.0021	190.4	7.3	172.4	6	412	93	4.7	153000	157	<66	7.19	1.48	17.3	895	472000	2.26	3.11	0.29	0.108	39.1	0.149	2.02	4.16	1.01	19	5.91	70.3	25.8	136	30	314	61.4	10450	0.688
AM18	RIM	AM18 RIM	190502	190502_027_LC018	LC018	30	10	3.5	0.187	0.011	0.02614	0.00067	0.30613	0.0512	0.0028	173.3	9.2	166.3	4.2	220	120	0.5	153000	62.5	<67	3.97	0.136	6.4	236.8	435000	0.721	2.21	<0.042	0.008	14.86	0.0196	0.46	0.83	0.383	4.59	1.409	17.37	6.84	37.4	8.82	93.2	21.9	10350	0.198
AM18	CORE	AM18 CORE	190502	190502_028_LC019	LC019	30	10	3.5	0.27	0.016	0.028	0.0011	0.527	0.0694	0.0038	242	13	177.7	6.8	880	120	1.14	153000	48	<69	3.22	2.84	<5.7	293	478000	0.652	3.76	<0.061	0.0115	12.01	0.0487	0.84	1.54	0.723	6.67	1.84	21.5	8.33	47.5	11.48	133	30.1	11190	0.156
AM18	RIM	AM18 RIM	190502	190502_029_LC020	LC020	30	10	3.5	0.205	0.019	0.0276	0.0012	0.52969	0.0531	0.0045	189	16	175.7	7.4	290	180	0.45	153000	35.6	<74	2.62	<0.054	<5.5	268	476000	0.767	2.28	<0.062	<0.004	12.71	0.02	0.47	0.59	0.369	3.7	1.296	17.3	7.37	41.2	11.12	142	32.5	10530	0.152
AM18	CORE	AM18 CORE	190502	190502_036_LC021	LC021	30	10	3.5	0.197	0.013	0.02612	0.00079	0.14042	0.0544	0.0038	182	11	166.2	5	340	150	0.79	153000	222	<74	8.33	1.72	11	871	434000	1.43	3.38	0.056	0.12	23.6	0.143	2.15	4.41	1.31	20.1	6.1	72.1	27.1	140	30.2	295	61.9	8850	0.373
AM18	RIM	AM18 RIM	190502	190502_037_LC022	LC022	30	10	3.5	0.195	0.012	0.02687	0.00056	0.026529	0.0522	0.0034	180	10	170.9	3.5	250	140	0.79	153000	62.3	<64	4.01	0.118	5	258.1	447000	0.804	2.1	<0.054	0.0064	16.97	0.0252	0.385	1.1	0.342	5.04	1.613	20.2	7.76	41	10.14	103.9	23.12	10730	0.242
AM18	CORE	AM18 CORE	190502	190502_038_LC023	LC023	30	10	3.5	0.221	0.042	0.02662	0.00077	0.11243	0.059	0.011	199	30	169.3	4.8	410	220	0.57	153000	110	<83	5.92	0.284	<5.9	887	421000	0.895	2.44	<0.085	0.0113	22.1	0.203	3.3	5.71	1.53	25.1	6.95	78.3	28.3	135.3	29.1	277	58.8	9750	0.26
AM18	RIM	AM18 RIM	190502	190502_039_LC024	LC024	30	10	3.5	0.1896	0.0092	0.02671	0.0006	0.35625	0.051	0.0024	175.9	7.9	169.9	3.8	210	100	0.38	153000	37.6	<66	2.94	0.08	<5.1	218.7	443000	0.626	1.97	<0.044	0.0048	15	0.0235	0.52	0.87	0.393	4.11	1.235	15.48	6.2	34.5	8.25	91.5	22.69	10290	0.171
AM18	CORE	AM18 CORE	190502	190502_041_LC025	LC025	30	10	3.5	0.2685	0.0095	0.03811	0.00092	0.33069	0.0507	0.0018	241.1	7.6	241.1	5.7	211	77	1.35	153000	296	<59	5.51	0.243	<4.8	1085	435000	1.623	2.07	<0.045	0.0047	15.91	0.068	1.31	3.58	0.342	19.9	6.91	89	34	171	35.9	339	67.8	11660	0.72
AM18	RIM	AM18 RIM	190502	190502_042_LC026	LC026	30	10	3.5	0.187	0.01	0.02561	0.00083	0.64862	0.0524	0.0021	173.5	8.6	163	5.2	292	91	10	153000	49.1	<69	3.93	1.55	56	419	454000	0.883	2.56	0.146	0.061	21.86	0.065	0.73	1.42	0.565	7.22	2.23	27.3	11.34	63.1	15.17	168.8	42.8	11560	0.21
AM18	CORE	AM18 CORE	190502	190502_043_LC027	LC027	30	10	3.5	0.291	0.034	0.0272	0.002	0.21011	0.0776	0.0094	258	27	173	13	1070	230	7.1	153000	115	<80	6.7	0.7	<6.1	506	453000	1.14	2.46	<0.084	0.05	22.6	0.064	1.18	2.51	0.8	12	3.66	42.7	16.3	80.9	18.2	201	37.1	9760	0.35
AM18	RIM	AM18 RIM	190502	190502_044_LC028	LC028	30	10	3.5	0.1759	0.009	0.02547	0.00052	0.18467	0.0497	0.0026	164.3	7.8	162.1	3.3	170	110	6.1	153000	43.3	<76	25.3	3.62	770	216.6	453000	0.679	2.18	<0.06	0.0239	14.77	0.0297	0.42	0.84	0.414	4.23	1.238	15.09	5.95	33.2	8.06	88.7	22.08	10530	0.128
AM18	CORE	AM18 CORE	190502	190502_046_LC029	LC029	30	10	3.5
AM18	RIM	AM18 RIM	190502	190502_047_LC030	LC030	30	10	3.5	0.184	0.013	0.02574	0.00083	0.21177	0.0516	0.0037	171	11	163.8	5.2	230	150	0.85	153000	27	<64	2.58	0.066	5.8	202	470000	0.581	2.22	<0.065	0.0197	18.04	0.0212	0.38	0.63	0.331	3.19	1.02	13.63	5.36	31.8	8.3	100	26.3	11710	0.117
AM18	CORE	AM18 CORE	190502	190502_048_LC031	LC031	30	10	3.5	0.186	0.016	0.0262	0.0013	0.57971	0.051	0.0038	172	13	166.8	8.4	210	160	2.68	153000	127	<56	7.08	0.294	<4.6	466	446000	1.043	1.94	<0.064	0.0104	21.8	0.0491	0.96	2.09	0.694	10.95	3.24	39.9	14.66	72.9	17.2	170	31.8	9530	0.331
AM18	RIM	AM18 RIM	190502	190502_049_LC032	LC032	30	10	3.5	0.1742	0.0065	0.02519	0.00037	0.12425	0.0496	0.0016	162.9	5.6	160.4	2.3	163	71	1.43	153000	54.1	<55	3.22	0.271	<4.4	380.1	454100	1.227	2.01	<0.036	0.104	32.36	0.071	1.07	1.84	0.796	9.46	2.597	29.84	11.11	57.4	13.1	136.1	32.43	11520	0.34
AM18	CORE	AM18 CORE	190502	190502_051_LC033	LC033	30	10	3.5	0.175	0.013	0.0265	0.0014	0.14155	0.0481	0.004	163	11	168.8	8.9	80	170	0.49	153000	132	<59	6.8	0.403	<5.2	768	452000	1.12	2.09	<0.076	0.25	24.5	0.184	2.37	4.48	1.3	20.6	5.98	70.8	23.5	114.7	25.5	253	45.9	10430	0.389
AM18	RIM	AM18 RIM	190502	190502_052_LC034	LC034	30	10	3.5	0.197	0.033	0.02594	0.00091	0.24683	0.0547	0.0086	182	27	165.1	5.7	320	320	<0.52	153000	47.1	<100	4.1	0.127	<8.3	227.9	442000	0.712	1.73	<0.12	0.0092	13.96	0.0133	0.67	1.03	0.224	4.89	1.55	18	6.87	36.3	7.76	77.9	17.7	11150	0.236
AM18	CORE	AM18 CORE	190502	190502_053_LC035	LC035	30	10	3.5	0.186	0.011	0.02426	0.00054	0.15377	0.0547	0.0038	172.6	9.5	154.5	3.4	360	160	672	153000	77.6	80	4.58	0.434	12.7	467	425000	1.072	2.23	2.29	0.192	25.5	0.091	1.32	2.23	0.688	11.17	3.37	40	14.78	73	16.13	161.8	34.5	10410	0.302
AM18	RIM	AM18 RIM	190502	190502_054_LC036	LC036	30	10	3.5
AM18	CORE	AM18 CORE	190502	190502_056_LC037	LC037	30	10	3.5
AM18	RIM	AM18 RIM	190502	190502_057_LC038	LC038	30	10	3.5	0.197	0.017	0.02619	0.00066	0.30473	0.0543	0.0043	182	14	166.6	4.1	340	170	39	153000	41.4	<73	7	0.4	21	207	453000	0.584	2.78	0.16	<0.0041	13.98	0.0206	0.48	0.96	0.361	3.89	1.136	14.53	5.78	32.2	7.85	86.6	21.34	10860	0.124
AM18	CORE	AM18 CORE	190502	190502_058_LC039	LC039	30	10	3.5	0.1946	0.0092	0.02601	0.00062	0.24222	0.0535	0.0026	180	7.8	165.5	3.9	330	110	158	153000	49.8	<55	4.86	0.173	6	384	449000	0.696	2.03	0.94	0.043	16.25	0.0581	1.03	2.1	0.689	9.15	2.64	31.3	11.33	58.5	13.66	144.8	30.6	11030	0.206
AM18	RIM	AM18 RIM	190502	190502_059_LC040	LC040	30	10	3.5	0.265	0.015	0.0274	0.00062	0.28254	0.0693	0.004	238	12	174.2	3.9	850	120	59	153000	25.2	<59	2.64	0.171	116	238	455000	0.557	2.06	0.66	0.0258	11.36	0.0396	0.67	1.13	0.574	5.02	1.37	16.7	6.59	36.7	8.88	100.1	25.5	10700	0.11
AM18	CORE	AM18 CORE	190502	190502_066_LC041	LC041	30	10	3.5	0.189	0.014	0.0259	0.0005	0.2303	0.0525	0.0037	175	12	164.9	3.2	250	150	2.85	153000	217.8	<55	12.49	0.408	<4.5	611	461600	0.935	1.95	<0.037	0.0086	14.42	0.097	1.68	3.68	1.143	16.38	4.71	54.3	19.46	94.1	19.77	191.6	40.5	9330	0.285
AM18	RIM	AM18 RIM	190502	190502_067_LC042	LC042	30	10	3.5	0.184	0.01	0.02634	0.00043	0.35727	0.0501	0.0027	171.1	9	167.6	2.7	170	110	0.85	153000	114.8	<60	5.03	0.214	12.1	454.5	468000	1.026	2.11	<0.048	0.0034	18.9	0.0524	0.87	2.1	0.618	10.22	3.093	37.6	14.01	72	15.78	160.7	34.53	11930	0.364
AM18	CORE	AM18 CORE	190502	190502_068_LC043	LC043	30	10	3.5	0.191	0.02	0.0262	0.002	0.20114	0.0536	0.0058	177	17	167	13	300	230	0.54	153000	62	<68	3.49	0.168	<5.3	576	457000	0.672	1.96	0.2	0.0307	21.9	0.183	2.89	4.63	1.62	16.6	4.47	49.6	17.7	84.9	20.7	221	44.1	9640	0.167
AM18	RIM	AM18 RIM	190502	190502_069_LC044	LC044	30	10	3.5	0.188	0.013	0.02594	0.00073	0.2883	0.0522	0.0037	174	11	165.1	4.6	260	150	2.19	153000	29.1	<74	2.82	0.184	11.6	211	458000	0.584	1.89	<0.071	0.049	13.2	0.038	0.48	1.54	0.52	6.1	1.64	17.8	6.5	31.6	7.8	85	20.7	11570	0.106
AM18	CORE	AM18 CORE	190502	190502_071_LC045	LC045	30	10	3.5	0.1868	0.0083	0.02577	0.00042	0.1706	0.0516	0.0022	173.5	7.1	164	2.7	263	97	0.93	153000	118.2	<52	6.42	1.77	8.8	1226	452000	1.005	3.24	0.514	0.172	27.6	0.31	4.3	7.55	2.18	35.3	10.08	115.1	39.1	183	37.6	350	69	10260	0.301
AM18	RIM	AM18 RIM	190502	190502_072_LC046	LC046	30	10	3.5	0.199	0.015	0.0273	0.00094	0.3232	0.0525	0.0035	183	12	173.6	5.9	270	140	23	153000	49.6	<58	4.2	1.65	4.6	330	470000	0.719	3.73	0.39	0.095	18.2	0.0475	0.64	1.39	0.564	6.33	1.9	24.5	9.78	52.4	13.48	146	32	10340	0.219
AM18	CORE	AM18 CORE	190502	190502_073_LC047	LC047	30	10	3.5	0.246	0.021	0.02652	0.00086	0.33304	0.0668	0.0054	222	17	168.7	5.4	770	170	<0.3	153000	104.7	<62	7.31	1.03	<4.9	356	450000	0.92	2.64	0.08	0.0078	19	0.0361	0.61	1.48	0.566	8.14	2.56	30.3	10.88	55.1	12.04	126.8	25.1	9880	0.262
AM18	RIM	AM18 RIM	190502	190502_074_LC048	LC048	30	10	3.5	0.1928	0.0094	0.02664	0.00043	0.21263	0.0525	0.0026	178.5	8	169.4	2.7	270	110	0.44	153000	21.1	<62	2.18	0.082	<4.5	115.3	458000	0.475	1.83	<0.048	<0.0032	9.93	0.0108	0.186	0.449	0.228	2.19	0.569	7.67	3.12	18.24	4.56	53.7	14.68	11530	0.095
AM18	CORE	AM18 CORE	190502	190502_076_LC049	LC049	30	10	3.5	0.1776	0.008	0.02616	0.00097	0.4312	0.0492	0.0023	165.8	6.9	166.5	6.1	150	100	2.1	153000	48.6	<71	4.02	0.123	<5.1	369	465000	0.958	1.68	<0.037	0.0107	26.6	0.087	1.07	1.77	0.771	7.65	2.11	27.2	10.36	57.3	14.09	163.2	38.9	10700	0.19
AM18	RIM	AM18 RIM	190502	190502_077_LC050	LC050	30	10	3.5	0.172	0.0072	0.02579	0.00044	0.18258	0.0481	0.002	160.9	6.3	164.1	2.8	93	90	0.97	153000	53	<50	4.66	0.087	<4.6	335	472000	0.746	1.86	<0.049	<0.0031	23.99	0.0464	0.77	1.37	0.669	6.36	1.91	23.1	9.06	51.3	12.65	142	37.3	10790	0.141
AM18	CORE	AM18 CORE	190502	190502_078_LC051	LC051	30	10	3.5	0.171	0.011	0.02586	0.00061	0.16868	0.0481	0.0031	159.3	9.2	164.6	3.8	110	140	1.47	153000	124.2	<55	9.77	0.59	<4.3	624	463000	0.705	1.86	<0.069	0.0086	17.1	0.094	1.99	4.13	1.21	19.3	5.15	58.7	19.54	93.8	19.37	179.1	36.1	10490	0.237
AM18	RIM	AM18 RIM	190502	190502_079_LC052	LC052	30	10	3.5	0.193	0.014	0.02624	0.00057	0.31251	0.0531	0.0037	178	12	167	3.6	280	140	0.86	153000	36.4	<67	2.93	0.107	<4.8	163.1	463000	0.584	1.98	<0.039	0.0031	11.35	0.0137	0.216	0.672	0.257	3.15	0.924	11.46	4.55	25.54	5.95	67.3	16.3	11490	0.153
AM18	CORE	AM18 CORE	190502	190502_081_LC053	LC053	30	10	3.5	0.183	0.023	0.0265	0.0012	0.27043	0.0502	0.0059	170	19	168.6	7.5	150	230	0.68	153000	67.6	<70	3.64	0.327	<5.6	534	455000	0.641	2.04	<0.061	0.088	19.1	0.123	1.89	3.78	1.2	16	3.93	48.8	17.1	83.1	18	180	37.3	10130	0.172
AM18	RIM	AM18 RIM	190502	190502_082_LC054	LC054	30	10	3.5	0.181	0.0095	0.02615	0.00047	0.24225	0.0501	0.0026	168.4	8.1	166.4	3	170	110	14	153000	46.6	<62	2.94	0.158	<4.8	256.7	437100	0.623	2.07	<0.038	0.0329	15.58	0.0398	0.51	1.02	0.516	5.12	1.436	18.04	7.26	40.5	9.61	106.5	27.5	10070	0.115
AM18	CORE	AM18 CORE	190502	190502_083_LC055	LC055	30	10	3.5	0.205	0.036	0.0275	0.0011	0.14647	0.0543	0.0094	193	32	175	6.8	240	320	2.64	153000	84.8	<81	9.98	0.219	<5.2	279	440300	0.533	1.81	<0.055	<0.0031	8.35	0.0284	0.48	1.17	0.375	6.49	1.97	23.4	8.47	43.5	9.27	90.2	19.5	10080	0.131
AM18	RIM	AM18 RIM	190502	190502_084_LC056	LC056	30	10	3.5	0.19	0.015	0.0272	0.00052	0.086055	0.0504	0.004	175	12	173	3.2	170	160	1.1	153000	146	<69	12.2	0.375	<4.8	717	455000	0.659	1.73	<0.046	0.0156	13.88	0.214	3.41	5.54	1.53	21.9	5.85	66.3	22.5	107.6	22.2	206	41.9	9730	0.225
AM18	CORE	AM18 CORE	190502	190502_086_LC057	LC057	30	10	3.5	0.216	0.017	0.02582	0.00077	0.46361	0.0604	0.0041	198	14	164.3	4.9	570	140	2600	153000	73	208	4.93	0.469	337	1000	407000	1.03	3.17	1.76	0.0414	37.1	0.372	6.2	9.2	3.35	34.5	8.7	95	31.8	148	29.9	281	57.3	8950	0.24
AM18	RIM	AM18 RIM	190502	190502_087_LC058	LC058	30	10	3.5
AM18	CORE	AM18 CORE	190502	190502_088_LC059	LC059	30	10	3.5	0.19	0.011	0.02738	0.00073	0.23344	0.0509	0.0031	177.7	9.9	174.1	4.6	200	130	0.6	153000	82.8	<66	4.87	0.342	<4.6	322	444000	0.835	2	<0.067	0.0086	18.48	0.026	0.58	1.32	0.42	7.54	2.2	26.8	9.83	51	11.46	110.5	23.83	10700	0.239
AM18	RIM	AM18 RIM	190502	190502_089_LC060	LC060	30	10	3.5	0.198	0.014	0.02699	0.00065	0.32703	0.0537	0.0038	185	13	171.7	4.1	290	140	4.6	153000	73.2	<60	4.54	0.16	<4.7	298	448000	0.779	1.78	<0.051	0.0221	17.79	0.0261	0.61	1.11	0.408	6.58	2.007	24.39	9.35	48.6	10.53	107.1	22.98	10950	0.249
AM18	CORE	AM18 CORE	190502	190502_096_LC061	LC061	30	10	3.5	0.782	0.046	0.0331	0.0014	0.44673	0.1713	0.0093	584	27	210	8.8	2550	93	19.6	153000	83.8	<76	6.08	0.475	<5.5	413	493000	0.564	1.99	0.104	0.072	12.23	0.073	1.14	2.24	0.83	10.2	3.11	35.7	12.7	61.4	13.7	135.8	28.3	11060	0.143
AM18	RIM	AM18 RIM	190502	190502_097_LC062	LC062	30	10	3.5	0.174	0.01	0.02536	0.00041	0.3338	0.0498	0.0027	162.9	8.8	161.5	2.6	170	120	1.52	153000	39.9	<73	2.85	1.82	<5.6	185.7	447000	0.554	1.89	<0.075	0.3	14.72	0.254	1.14	0.85	0.395	3.58	1.055	13.45	5.4	29.6	7.13	79.9	19.82	10880	0.121
AM18	CORE	AM18 CORE	190502	190502_098_LC063	LC063	30	10	3.5	0.187	0.017	0.02642	0.00087	0.51438	0.0512	0.0041	174	15	168.1	5.5	210	170	510	153000	87	<72	6.1	0.192	28	571	425000	0.627	1.59	8.2	0.123	16.4	0.095	1.82	3.48	1.15	14.8	4.27	50.3	17.7	86.8	18.5	178	38.7	9810	0.187
AM18	RIM	AM18 RIM	190502	190502_099_LC064	LC064	30	10	3.5	0.1838	0.0097	0.02588	0.00069	0.37278	0.0522	0.0026	170.9	8.3	164.7	4.3	260	110	16.2	153000	45.9	<59	3.3	0.38	13.4	345	463000	0.746	1.92	0.235	0.0326	20.91	0.0494	0.7	1.05	0.556	6.27	1.865	23.51	9.35	53.3	12.3	139.6	34.9	10820	0.153
AM18	CORE	AM18 CORE	190502	190502_101_LC065	LC065	30	10	3.5
AM18	RIM	AM18 RIM	190502	190502_102_LC066	LC066	30	10	3.5	0.2	0.014	0.02734	0.00057	0.21268	0.0527	0.0038	185	12	173.9	3.6	270	150	0.4	153000	79.6	<52	5.13	0.149	<4.7	314	461000	0.764	1.65	<0.068	0.0034	17.43	0.0295	0.69	1.37	0.459	6.86	2.01	25	9.41	47.9	11.38	114.5	24.4	10310	0.231
AM18	CORE	AM18 CORE	190502	190502_103_LC067	LC067	30	10	3.5	0.1777	0.0098	0.0261	0.00058	0.21714	0.0498	0.0031	165.8	8.4	166.1	3.7	160	130	2.38	153000	204	<79	7.55	0.631	<5.5	921	447000	1.24	1.97	<0.091	0.042	28.2	0.185	2.75	5.9	1.53	26.1	7.25	84.2	29	139.3	28.21	277	56.2	10030	0.348
AM18	RIM	AM18 RIM	190502	190502_104_LC068	LC068	30	10	3.5	0.1712	0.0097	0.02428	0.00055	0.41756	0.0512	0.0026	160.2	8.4	154.6	3.5	230	110	<0.43	153000	63	<92	3.45	<0.064	<6.5	335.2	440700	0.841	1.5	<0.095	0.0035	24.51	0.042	0.63	1.35	0.587	7.27	2.001	24.9	9.59	51	11.96	124.3	29.77	10780	0.211
AM4	CORE	AM4 CORE	190502	190502_106_LC069	LC069	30	10	3.5	0.174	0.018	0.0261	0.00066	0.0024984	0.0489	0.0053	162	16	166	4.1	60	210	8.1	153000	176	<67	14.05	0.422	<4.5	449	448000	0.633	1.66	<0.031	0.0093	12.52	0.125	1.93	3.23	0.89	13.4	3.66	41.5	14	66.8	13.91	131.9	27.4	9000	0.227
AM4	RIM	AM4 RIM	190502	190502_107_LC070	LC070	30	10	3.5	0.188	0.024	0.02755	0.00077	0.081961	0.05	0.0064	176	21	175.2	4.8	120	250	8.41	153000	125.7	<70	12.78	0.296	<5	202	446000	0.611	1.6	<0.031	<0.0034	10.56	0.0238	0.468	0.86	0.33	4.93	1.409	17.93	6.51	31.74	6.98	69.9	14.71	9900	0.175
AM4	CORE	AM4 CORE	190502	190502_108_LC071	LC071	30	10	3.5	0.175	0.017	0.02685	0.00075	0.14255	0.0482	0.0046	163	14	170.8	4.7	50	190	0.57	153000	136.3	<56	10.82	0.437	<4.8	375	444000	0.729	1.6	<0.039	0.0189	14.28	0.0386	0.85	1.82	0.534	9.35	2.81	32	11.94	56.4	12.19	117.1	23.61	9700	0.255
AM4	RIM	AM4 RIM	190502	190502_109_LC072	LC072	30	10	3.5	0.1816	0.0082	0.02567	0.00048	0.44781	0.0514	0.0022	169.1	7	163.4	3	231	95	21.7	153000	106.5	93	6.49	0.538	79	370.4	458400	1.148	1.73	0.277	0.074	23.64	0.0743	0.8	1.34	0.369	6.73	2.184	27.52	10.47	57	13.15	140.1	32.15	12130	0.406
AM4	CORE	AM4 CORE	190502	190502_111_LC073	LC073	30	10	3.5	0.186	0.022	0.02705	0.00068	0.24827	0.0501	0.006	172	19	172.1	4.3	130	230	6.21	153000	271	<76	12.68	0.31	<5.5	446	446000	0.629	1.73	<0.091	0.102	10.4	0.138	1.45	2.53	0.823	12.08	3.35	38.8	13.72	67.7	14.1	136.9	29.89	8810	0.157
AM4	RIM	AM4 RIM	190502	190502_112_LC074	LC074	30	10	3.5	0.189	0.015	0.02647	0.00056	0.22675	0.051	0.0038	175	13	168.4	3.5	220	160	1.05	153000	117.9	<67	6.74	0.207	<4.8	300.6	451000	0.794	1.65	0.013	0.032	15.09	0.0248	0.46	1.11	0.318	6.09	1.984	24.34	9.22	47.1	10.73	107.6	22.69	11180	0.264
AM4	CORE	AM4 CORE	190502	190502_113_LC075	LC075	30	10	3.5	0.2085	0.0095	0.02662	0.00058	0.34063	0.0569	0.0024	191.8	7.9	169.4	3.6	454	95	13.1	153000	312	<62	16.06	1.73	38.6	992	437000	1.54	1.81	0.57	0.201	27.7	0.175	2.83	4.85	1.293	21.8	6.53	80.9	30.6	154.2	33.02	321.5	67.2	8470	0.43
AM4	RIM	AM4 RIM	190502	190502_114_LC076	LC076	30	10	3.5
AM4	CORE	AM4 CORE	190502	190502_116_LC077	LC077	30	10	3.5	0.196	0.028	0.0264	0.001	0.23159	0.0539	0.0085	187	28	167.9	6.4	320	330	0.6	153000	170	<84	14.5	0.551	<6.6	444	425700	0.736	1.65	<0.094	0.0062	14.18	0.095	1.59	3.28	0.85	13.82	3.71	40.9	13.9	64.8	13.52	125.6	26.34	9110	0.217
AM4	RIM	AM4 RIM	190502	190502_117_LC078	LC078	30	10	3.5	0.201	0.02	0.0266	0.0011	0.50422	0.0552	0.005	186	17	169.3	7	380	200	2.77	153000	106.6	<78	7.8	0.314	<5.7	347	497000	1.16	1.87	<0.067	0.0091	20.8	0.044	0.67	1.41	0.469	7.19	2.42	29.1	10.49	53.4	12.94	140	28	11870	0.349
AM4	CORE	AM4 CORE	190502	190502_118_LC079	LC079	30	10	3.5	0.176	0.013	0.02667	0.0008	0.1952	0.0484	0.0037	164	11	169.6	5	80	150	1.54	153000	150.9	<67	14.28	0.423	<4.9	370	446900	0.628	1.6	<0.041	<0.0042	12.53	0.0481	1.17	2.05	0.592	9.91	2.74	32.3	11.71	55.3	11.76	113.7	23.68	9220	0.192
AM4	RIM	AM4 RIM	190502	190502_119_LC080	LC080	30	10	3.5
AM4	CORE	AM4 CORE	190502	190502_126_LC081	LC081	30	10	3.5	0.175	0.013	0.02734	0.00068	0.075293	0.0471	0.0038	163	11	173.9	4.3	30	160	2.09	153000	113.8	<70	6.63	0.211	<4.6	240.4	448000	0.839	1.63	<0.056	0.0076	13.69	0.0177	0.33	0.83	0.253	4.66	1.55	19.72	7.36	38.4	8.72	89.1	19.15	11740	0.289
AM4	RIM	AM4 RIM	190502	190502_127_LC082	LC082	30	10	3.5	0.1869	0.007	0.02634	0.00054	0.17577	0.0518	0.002	173.7	6	167.6	3.4	253	88	10.4	153000	114.2	<60	4.44	0.283	12.5	363.3	450100	1.131	1.48	0.078	0.172	22.1	0.062	0.63	1.34	0.399	7.24	2.24	27.41	10.49	57	13.21	141.1	31.98	12260	0.425
AM4	CORE	AM4 CORE	190502	190502_128_LC083	LC083	30	10	3.5	0.195	0.021	0.02707	0.00064	0.28487	0.0531	0.0063	179	18	172.1	4	230	230	2.51	153000	161.6	<74	12.68	0.53	<5.3	384	445000	0.608	1.41	<0.04	0.0103	11.53	0.062	1.17	2.24	0.792	10.07	2.93	34	11.76	58.5	12.35	120.4	25.51	9120	0.167
AM4	RIM	AM4 RIM	190502	190502_129_LC084	LC084	30	10	3.5	0.193	0.015	0.0273	0.00044	0.12525	0.0516	0.0039	178	13	173.6	2.7	210	160	2.69	153000	142.8	<65	9.28	0.27	<4.8	290.1	458000	0.854	1.53	<0.047	0.0065	14.72	0.0231	0.493	1.3	0.339	6.09	2.005	23.62	9.08	45.6	10.02	99.7	21.4	10810	0.291
AM4	CORE	AM4 CORE	190502	190502_131_LC085	LC085	30	10	3.5	0.193	0.017	0.02753	0.00063	0.058968	0.0506	0.0047	178	15	175	4	180	190	2.61	153000	185.7	<64	10.91	0.348	<5	423.5	450000	0.714	1.49	<0.041	0.0475	11.61	0.058	1.3	2.55	0.788	12.21	3.42	39	13.16	63.8	13.48	129	26.69	9260	0.245
AM4	RIM	AM4 RIM	190502	190502_132_LC086	LC086	30	10	3.5	0.189	0.018	0.02589	0.00055	0.24534	0.0534	0.0049	175	15	164.8	3.4	280	190	1.58	153000	148	<69	5.63	0.208	<5.7	246	440700	0.796	1.51	<0.072	0.066	13.83	0.0225	0.249	0.86	0.225	4.7	1.571	19.86	7.53	39.3	8.88	91.1	20.51	11870	0.311
AM4	CORE	AM4 CORE	190502	190502_133_LC087	LC087	30	10	3.5	0.201	0.013	0.0273	0.00057	0.098707	0.0538	0.0035	185	11	173.6	3.5	310	140	<0.31	153000	176.2	<63	14.08	0.454	<4.5	891	447000	0.623	1.55	<0.046	0.0453	15.82	0.451	5.57	8.54	2.2	29.14	7.61	82	28.7	132.8	26.95	251.3	50.6	9140	0.273
AM4	RIM	AM4 RIM	190502	190502_134_LC088	LC088	30	10	3.5	0.178	0.015	0.0266	0.0011	0.26211	0.0491	0.0041	166	13	169.4	6.7	120	170	0.44	153000	134.4	<72	11.29	0.419	<5.5	497	451000	0.552	1.62	<0.059	0.0099	11.29	0.087	1.53	2.88	0.97	13.8	4.01	45.7	15.3	75.8	15.2	147	29.8	9610	0.194
AM4	CORE	AM4 CORE	190502	190502_136_LC089	LC089	30	10	3.5	0.181	0.014	0.0269	0.00071	0.3242	0.0492	0.0037	168	12	171.1	4.5	120	160	11.9	153000	218.1	<61	14.52	0.36	<4.6	450.7	447400	0.707	1.49	0.055	0.0053	12.1	0.0757	1.29	2.52	0.798	11.63	3.28	38.7	13.92	69.7	15.47	155	35.02	8970	0.266
AM4	RIM	AM4 RIM	190502	190502_137_LC090	LC090	30	10	3.5	0.193	0.019	0.02678	0.00063	0.12377	0.0526	0.005	179	16	170.4	4	250	200	0.8	153000	122.3	<65	6.68	0.267	<5.1	357	472000	1.082	1.56	<0.056	<0.0034	19.58	0.0222	0.48	1.31	0.413	7.39	2.3	28.74	10.64	54.7	12.43	125.4	26.22	12240	0.388
AM4	CORE	AM4 CORE	190502	190502_138_LC091	LC091	30	10	3.5	0.198	0.022	0.02706	0.0008	0.18539	0.0536	0.006	181	18	172.1	5	230	220	2.7	153000	143.2	<60	12.79	0.381	<4.6	323.2	446700	0.604	1.47	<0.047	<0.0016	11.74	0.0322	0.66	1.41	0.465	7.75	2.34	27.8	10.11	50.5	10.59	105.8	21.83	9570	0.2
AM4	RIM	AM4 RIM	190502	190502_139_LC092	LC092	30	10	3.5	0.1803	0.0083	0.0268	0.00066	0.20557	0.0491	0.0022	168.1	7.1	170.5	4.1	140	100	2.7	153000	86.2	<84	5.11	0.145	<5.8	202	440500	0.905	1.4	<0.052	0.004	15.93	0.0171	0.38	0.75	0.211	3.3	1.057	14.16	5.71	31.76	7.59	86	20.68	12110	0.373
AM4	CORE	AM4 CORE	190502	190502_141_LC093	LC093	30	10	3.5	0.176	0.012	0.02704	0.00054	0.021441	0.0478	0.0035	164	11	172	3.4	50	150	2.64	153000	180.3	<60	11.46	0.331	<4.6	711	450000	0.636	1.42	<0.031	0.0035	15.25	0.111	2.05	4.48	1.1	20.01	5.81	65	22.47	107	22.05	201.9	41.39	10540	0.239
AM4	RIM	AM4 RIM	190502	190502_142_LC094	LC094	30	10	3.5	0.172	0.016	0.02815	0.00073	0.17813	0.0448	0.0046	160	14	178.9	4.6	-80	190	1.63	153000	154	<74	9.16	0.263	<4.3	355.5	476000	0.889	1.52	<0.035	0.0039	17.2	0.0339	0.52	1.46	0.426	8.21	2.51	29.67	10.8	54	11.79	123.7	24.52	10970	0.281
AM4	CORE	AM4 CORE	190502	190502_143_LC095	LC095	30	10	3.5	0.179	0.012	0.02684	0.00066	0.32126	0.0492	0.0035	166	10	170.7	4.2	110	140	1.4	153000	149.5	<61	8.98	0.262	<4.8	357.3	456000	0.834	1.35	<0.04	<0.0043	14.62	0.0286	0.59	1.5	0.476	8.37	2.56	30.28	10.97	54.8	11.83	115.9	24.69	10660	0.271
AM4	RIM	AM4 RIM	190502	190502_144_LC096	LC096	30	10	3.5	0.189	0.015	0.02724	0.00062	0.12094	0.0512	0.0042	175	12	173.2	3.9	180	160	0.31	153000	144.2	<64	10.21	0.324	<4.4	417	451000	0.679	1.45	<0.04	0.0069	12.61	0.064	1.13	2.43	0.701	11.55	3.21	36.7	12.9	62.3	13.33	127.7	26.83	9770	0.219
AM4	CORE	AM4 CORE	190502	190502_146_LC097	LC097	30	10	3.5	0.189	0.023	0.02777	0.00074	0.19143	0.0497	0.0056	175	19	176.6	4.6	120	220	23.1	153000	144	<73	13.01	1.12	<5.7	554	449000	0.53	1.43	0.129	0.043	15.04	0.107	1.87	3.84	1.07	17.3	4.61	51.3	17.2	79	16.2	150	31.4	9240	0.176
AM4	RIM	AM4 RIM	190502	190502_147_LC098	LC098	30	10	3.5	0.225	0.015	0.02576	0.0004	0.12889	0.0637	0.0045	205	12	164	2.5	670	150	460	153000	90.9	104	5.62	1.25	18.6	279	464300	0.94	1.57	0.253	0.282	20.46	0.181	1.25	1.25	0.342	5.09	1.65	21	7.97	44.1	10.06	105.4	25.08	12770	0.352
AM4	CORE	AM4 CORE	190502	190502_148_LC099	LC099	30	10	3.5	0.196	0.017	0.02727	0.00066	0.0081026	0.0516	0.0043	180	14	173.4	4.2	240	180	0.37	153000	143.3	<57	12.3	0.505	<4.6	525	445000	0.631	1.47	<0.04	0.0041	13.46	0.107	2.09	4.2	1.17	17.7	4.68	49.8	16.75	77.6	15.61	144.5	28.7	9260	0.174
AM4	RIM	AM4 RIM	190502	190502_149_LC100	LC100	30	10	3.5	0.191	0.025	0.02663	0.00079	0.062234	0.0522	0.0068	176	21	169.4	4.9	280	300	2.74	153000	103.2	<81	6.23	0.189	<6.2	245.6	441000	0.775	1.41	<0.058	<0.0049	12.99	0.0208	0.256	0.91	0.245	4.72	1.554	20.05	7.35	39.7	8.89	88.9	20.02	11760	0.278
AM4	CORE	AM4 CORE	190502	190502_156_LC101	LC101	30	10	3.5	0.198	0.018	0.02692	0.00062	0.22973	0.0537	0.0049	182	16	171.2	3.9	260	180	7.12	153000	168.9	<63	13.31	0.594	<4.5	308	455000	0.773	1.72	0.059	<0.0032	15.04	0.0328	0.69	1.45	0.51	7.87	2.355	27.48	9.53	47.3	10.24	98.7	20.93	9620	0.217
AM4	RIM	AM4 RIM	190502	190502_157_LC102	LC102	30	10	3.5	0.191	0.015	0.02698	0.00067	0.0052558	0.0521	0.0044	176	13	171.6	4.2	210	170	4.73	153000	171.9	<65	15.47	0.417	<4.4	343.7	451000	0.627	1.45	<0.061	0.0033	13.13	0.0472	0.71	1.83	0.582	8.99	2.57	30.13	10.52	51.9	11.1	108.1	22.74	9370	0.195
AM4	CORE	AM4 CORE	190502	190502_158_LC103	LC103	30	10	3.5	0.228	0.011	0.02657	0.00048	0.0067831	0.0627	0.0031	207.7	9	169	3	650	110	6.25	153000	124.4	<63	6.58	1.23	71	352.8	445800	0.868	1.71	1.4	0.244	15.52	0.0859	0.81	1.49	0.456	7.33	2.3	28.31	10.81	55.7	12.57	131.4	30.67	11940	0.272
AM4	RIM	AM4 RIM	190502	190502_159_LC104	LC104	30	10	3.5	0.177	0.015	0.0273	0.00055	0.025026	0.0476	0.0042	165	13	173.6	3.4	70	180	<0.49	153000	118	<100	4.95	0.209	<7.2	411.6	434000	1.08	1.38	<0.11	<0.006	21.43	0.03	0.72	1.53	0.353	8.34	2.77	33.7	12.12	63.6	13.48	138.4	30.33	12010	0.505
AM4	CORE	AM4 CORE	190502	190502_161_LC105	LC105	30	10	3.5	0.268	0.023	0.02813	0.00064	0.25225	0.0695	0.0058	239	18	178.8	4	790	170	4.16	153000	146.9	<63	12.43	1.95	118	536	459000	0.601	1.6	0.69	0.208	14.47	0.149	2.36	4.21	1.12	16.3	4.61	49.8	16.8	77.8	16.1	158	33.2	9690	0.178
AM4	RIM	AM4 RIM	190502	190502_162_LC106	LC106	30	10	3.5	0.185	0.017	0.02736	0.00074	0.029295	0.049	0.0045	171	14	174	4.6	120	190	1.2	153000	159	<55	9.77	0.375	<4.4	413.6	453000	0.75	1.38	<0.053	<0.0041	12.86	0.0446	0.91	1.94	0.588	10.29	3	36	12.47	63	13.07	130	26.94	9970	0.25
AM4	CORE	AM4 CORE	190502	190502_163_LC107	LC107	30	10	3.5	0.32	0.016	0.03059	0.00071	0.16491	0.0775	0.0042	283	13	194.2	4.4	1080	110	6.42	153000	259.4	<62	15.84	4.81	<4.5	589	452000	0.823	1.81	0.088	0.0271	13.78	0.124	2.18	3.55	0.952	15.19	4.18	50.1	18.35	91.5	19.84	197.7	42.8	8870	0.267
AM4	RIM	AM4 RIM	190502	190502_164_LC108	LC108	30	10	3.5	0.258	0.03	0.0285	0.001	0.23675	0.0667	0.0084	232	24	181	6.5	740	270	4.29	153000	148	<110	8.5	1.47	<7.4	253.1	433000	0.706	1.65	<0.041	<0.0084	10.71	0.0242	0.36	0.99	0.303	5.79	1.68	20.98	7.81	41.1	8.7	85.4	19.28	10100	0.164
AM4	CORE	AM4 CORE	190502	190502_166_LC109	LC109	30	10	3.5	0.196	0.021	0.02922	0.00072	0.3842	0.0492	0.0047	181	18	185.7	4.5	120	200	56	153000	207.4	<67	14	0.326	6	502	471000	0.794	1.27	0.35	0.029	12.01	0.069	0.98	2.58	0.711	12.01	3.48	41.2	15.17	77.1	16.87	165.8	35.4	9130	0.23
AM4	RIM	AM4 RIM	190502	190502_167_LC110	LC110	30	10	3.5	0.188	0.013	0.02895	0.00077	0.41783	0.048	0.003	174	12	183.9	4.8	90	130	1.8	153000	65.2	<63	5.33	0.154	<4.5	180.6	482000	0.748	1.5	<0.036	0.0035	13.53	0.0169	0.41	0.66	0.205	3.18	1.091	13.7	5.19	29.6	7.48	83.3	18.43	13100	0.293
AM4	CORE	AM4 CORE	190502	190502_168_LC111	LC111	30	10	3.5
AM4	RIM	AM4 RIM	190502	190502_169_LC112	LC112	30	10	3.5	0.184	0.012	0.02721	0.00048	0.084208	0.0494	0.0033	171	10	173	3	160	150	1.17	153000	143.9	<59	7.48	1.03	<4.1	361.4	460000	1.04	1.53	<0.029	0.0053	18.08	0.0235	0.59	1.26	0.351	7.21	2.37	29.02	11.12	55.7	12.32	125.7	26.25	11730	0.371
AM4	CORE	AM4 CORE	190502	190502_171_LC113	LC113	30	10	3.5	0.21	0.027	0.02766	0.00096	0.20694	0.0561	0.0076	193	23	175.9	6.1	370	290	7	153000	179.1	<110	13.8	0.828	<7.2	333.8	437100	0.703	1.24	<0.094	<0.0052	16.19	0.041	0.89	2.2	0.58	10.79	2.75	32.1	10.63	50.4	10.63	100.2	21.15	9520	0.219
AM4	RIM	AM4 RIM	190502	190502_172_LC114	LC114	30	10	3.5	0.193	0.012	0.02759	0.00053	0.0042457	0.0513	0.0033	179	10	175.5	3.3	220	140	0.36	153000	100	<68	5.22	0.183	<4.7	316	460000	0.962	1.27	<0.052	0.0055	16.88	0.0154	0.57	0.93	0.3	5.78	1.961	24.32	9.42	50	11.1	114.9	25.29	12730	0.382
AM4	CORE	AM4 CORE	190502	190502_173_LC115	LC115	30	10	3.5	0.193	0.014	0.02744	0.00054	0.1568	0.0519	0.0038	178	12	174.5	3.4	230	150	9.51	153000	242.2	<63	15.91	0.605	4.5	474	449000	0.681	1.97	<0.053	0.014	13.9	0.105	1.88	3.24	0.901	13.22	3.64	41.2	14.29	72.5	15.47	154	34.5	8960	0.258
AM4	RIM	AM4 RIM	190502	190502_174_LC116	LC116	30	10	3.5	0.185	0.011	0.02771	0.00048	0.251	0.0482	0.0028	171.9	9.8	176.2	3	110	120	1.32	153000	127.1	<66	5.92	0.245	<4.6	341.8	458400	1.007	1.29	<0.067	0.0041	18.33	0.018	0.42	1.16	0.3	6.23	2.158	26.69	10.18	53.9	11.97	120.4	26.34	12630	0.394
AM4	CORE	AM4 CORE	190502	190502_176_LC117	LC117	30	10	3.5	0.178	0.017	0.0276	0.00065	0.14748	0.0473	0.0044	165	15	175.5	4.1	20	180	1.12	153000	181.9	<66	14.76	0.819	<4.5	554	451200	0.672	1.46	<0.071	0.0104	15.67	0.142	2.36	4.35	1.19	18.2	4.73	52.2	17.1	79.8	16.3	153.8	31	9500	0.229
AM4	RIM	AM4 RIM	190502	190502_177_LC118	LC118	30	10	3.5
AM4	CORE	AM4 CORE	190502	190502_178_LC119	LC119	30	10	3.5	0.196	0.019	0.02746	0.00072	0.1504	0.0539	0.0057	183	17	174.6	4.5	230	200	4.81	153000	173.8	<48	14.19	0.491	<4.4	527	459000	0.658	1.44	<0.048	0.0286	15.44	0.148	2.71	4.32	1.17	17.5	4.62	50.1	16.69	78.5	15.75	149.9	29.6	9540	0.197
AM4	RIM	AM4 RIM	190502	190502_179_LC120	LC120	30	10	3.5	0.181	0.017	0.02744	0.00078	0.30558	0.0483	0.0043	168	15	174.5	4.9	90	190	1.32	153000	141.7	<90	9.98	0.373	<5.6	329.4	440300	0.759	1.3	<0.047	<0.0044	16.92	0.0288	0.64	1.57	0.393	7.61	2.35	28.5	10.06	51.1	11.1	109	22.94	10890	0.298
AM18 LHG	CORE	AM18 LHG CORE	190502	190502_186_LC121	LC121	30	10	3.5	0.178	0.013	0.02665	0.00044	0.13209	0.0488	0.0035	166	11	169.5	2.8	110	150	4.1	153000	166.1	<59	13.27	0.328	<4.3	337.2	463000	0.666	1.38	<0.047	<0.0029	12.71	0.0293	0.73	1.68	0.555	8.39	2.478	29.37	10.23	50.5	10.81	103.5	22.35	9850	0.215
AM18 LHG	RIM	AM18 LHG RIM	190502	190502_187_LC122	LC122	30	10	3.5	0.173	0.014	0.0274	0.00058	0.033158	0.0465	0.0037	161	12	174.2	3.6	0	160	8	153000	158.3	<55	9.7	0.365	<4.4	318.5	460700	0.696	1.34	0.074	0.0067	13.21	0.0299	0.63	1.22	0.487	7.52	2.228	27.04	9.81	50	10.66	104.3	22.43	10350	0.215
AM18 LHG	CORE	AM18 LHG CORE	190502	190502_188_LC123	LC123	30	10	3.5	0.621	0.039	0.057	0.0024	0.84874	0.0791	0.0028	487	24	357	15	1151	74	350	153000	126	129	5.5	0.97	318	281	462000	0.562	1.56	0.266	0.258	12.33	0.246	2.17	1.44	0.781	6.08	1.76	21.7	8.41	45.7	10.25	106.2	24.3	10750	0.181
AM18 LHG	RIM	AM18 LHG RIM	190502	190502_189_LC124	LC124	30	10	3.5	0.194	0.011	0.02794	0.00044	0.19008	0.0507	0.0029	179.1	9.4	177.7	2.8	200	120	<0.31	153000	95.5	<73	3.96	0.128	16.3	432	466400	0.922	1.29	<0.043	0.0044	17.29	0.0288	0.76	1.59	0.562	8.31	2.63	32.9	12.93	70	15.55	161	36.7	11660	0.296
AM18 LHG	CORE	AM18 LHG CORE	190502	190502_191_LC125	LC125	30	10	3.5
AM18 LHG	RIM	AM18 LHG RIM	190502	190502_192_LC126	LC126	30	10	3.5	0.178	0.018	0.0279	0.001	0.38134	0.0467	0.0047	166	16	177.2	6.2	20	200	<0.36	153000	78.4	<73	4.2	0.132	<5.3	268.7	495000	0.596	1.28	<0.071	<0.0039	14.61	0.021	0.43	1.19	0.488	6.03	1.85	22.69	8.46	43.5	9.9	100.2	21.79	12330	0.196
AM18 LHG	CORE	AM18 LHG CORE	190502	190502_193_LC127	LC127	30	10	3.5	0.17	0.013	0.02735	0.0007	0.098804	0.0464	0.004	159	11	173.9	4.4	10	170	3.8	153000	128	<83	5.51	0.187	28.3	496	459200	0.63	1.23	<0.068	0.0067	14.25	0.065	1.18	2.49	0.788	11.75	3.42	42	14.88	76	16.49	163.1	35.87	10730	0.211
AM18 LHG	RIM	AM18 LHG RIM	190502	190502_194_LC128	LC128	30	10	3.5	0.1844	0.0085	0.02677	0.00039	0.037839	0.0505	0.0024	171.5	7.3	170.3	2.5	190	100	56	153000	66.6	<58	4.01	0.086	<4.8	268.9	467400	0.61	1.3	0.72	0.02	18.36	0.0385	0.53	1.24	0.509	6.03	1.669	20.04	7.89	42.4	9.67	106.2	25.49	11340	0.142
AM18 LHG	CORE	AM18 LHG CORE	190502	190502_196_LC129	LC129	30	10	3.5	0.189	0.018	0.02702	0.00049	0.24417	0.0512	0.0048	174	15	171.9	3.1	200	190	1.57	153000	155.2	<62	12.33	0.288	<4.3	480	474600	0.661	1.21	<0.047	0.003	12.1	0.063	1.3	2.88	0.85	14	3.81	44.1	15	71.5	14.6	138.8	29	10150	0.211
AM18 LHG	RIM	AM18 LHG RIM	190502	190502_197_LC130	LC130	30	10	3.5	0.183	0.024	0.02624	0.00077	0.017657	0.0514	0.0072	170	21	167	4.8	220	310	4.8	153000	322	153	6.83	0.27	8	381	444100	0.952	1.5	0.15	0.92	20.5	0.279	1.31	1.75	0.37	8.44	2.71	31.2	11.7	59.1	12.68	128.4	26.97	11780	0.362
AM18 LHG	CORE	AM18 LHG CORE	190502	190502_198_LC131	LC131	30	10	3.5	0.175	0.011	0.02688	0.00064	0.25956	0.0478	0.0035	163.2	9.7	171	4	70	150	0.52	153000	146	<74	5.55	0.226	<4.8	656	472300	1.31	1.32	<0.073	0.004	28.4	0.066	1.08	2.66	0.775	14.35	4.3	53.5	20.66	102.2	21.91	215	44.4	11730	0.387
AM18 LHG	RIM	AM18 LHG RIM	190502	190502_199_LC132	LC132	30	10	3.5	0.185	0.011	0.02674	0.00038	0.044157	0.0509	0.003	172.2	9	170.1	2.4	200	120	1.7	153000	97.6	<72	4.74	0.183	<4.3	513	467300	0.988	1.3	<0.04	0.0044	26.63	0.0464	1.01	1.88	0.637	10.25	3.22	39.6	15.23	80.4	17.56	178.6	39.09	11220	0.299
AM18 LHG	CORE	AM18 LHG CORE	190502	190502_201_LC133	LC133	30	10	3.5
AM18 LHG	RIM	AM18 LHG RIM	190502	190502_202_LC134	LC134	30	10	3.5	0.1816	0.0086	0.02649	0.00045	0.055244	0.0504	0.0025	169	7.4	168.5	2.8	190	110	0.79	153000	67.6	<57	3.49	0.162	<4.5	339	467700	0.768	1.37	<0.039	0.0203	19.33	0.0383	0.58	1.39	0.5	7.03	2.14	25.9	10.04	53	11.97	127	29.8	11500	0.209
AM18 LHG	CORE	AM18 LHG CORE	190502	190502_203_LC135	LC135	30	10	3.5	0.186	0.017	0.02762	0.0006	0.2508	0.0501	0.005	172	14	175.6	3.8	130	200	4.41	153000	165.4	<71	13.28	0.385	<4.3	349.7	465500	0.638	1.29	<0.01	<0.0026	11.74	0.0391	0.81	1.62	0.483	8.39	2.508	29.79	10.58	54.1	11.45	113.8	24.44	10170	0.233
AM18 LHG	RIM	AM18 LHG RIM	190502	190502_204_LC136	LC136	30	10	3.5	0.1793	0.009	0.02615	0.00046	0.30308	0.0502	0.0024	167	7.7	166.4	2.9	180	100	<0.29	153000	39	<60	2.06	<0.042	<4.2	134.6	471500	0.454	1.27	<0.046	0.0029	9.68	0.0069	0.144	0.409	0.219	2.3	0.713	8.9	3.82	21.48	5.41	65	17.48	13160	0.134
AM18 LHG	CORE	AM18 LHG CORE	190502	190502_206_LC137	LC137	30	10	3.5	0.197	0.02	0.02698	0.00057	0.039261	0.0538	0.0056	180	16	171.6	3.6	240	200	5.9	153000	136.7	<63	11.88	0.282	<4.4	226.4	473100	0.559	1.34	<0.052	<0.0033	10.77	0.0205	0.341	0.813	0.306	4.76	1.566	18.83	6.87	36.2	7.87	80.8	17.84	10380	0.192
AM18 LHG	RIM	AM18 LHG RIM	190502	190502_207_LC138	LC138	30	10	3.5	0.194	0.016	0.02617	0.00053	0.064971	0.0545	0.0045	179	13	166.5	3.3	310	170	2.72	153000	61.5	<55	4.35	0.232	8.6	374.4	476100	0.504	1.27	0.072	0.0101	12.54	0.0344	0.83	1.69	0.655	8.59	2.512	29.99	11.19	58.3	12.75	128.6	28.72	11600	0.149
AM18 LHG	CORE	AM18 LHG CORE	190502	190502_208_LC139	LC139	30	10	3.5	0.1841	0.0071	0.02512	0.00044	0.24686	0.0537	0.0021	171.4	6	159.9	2.7	340	88	<0.33	153000	345	<70	7.22	1.87	14.1	1840	477000	4.99	1.89	<0.049	0.068	118	0.188	3.66	9.2	2	48.7	14.3	168	58.2	279	58.4	545	107	11380	1.41
AM18 LHG	RIM	AM18 LHG RIM	190502	190502_209_LC140	LC140	30	10	3.5	0.184	0.011	0.02678	0.00057	0.22387	0.0502	0.0028	170.5	9	170.4	3.6	170	120	0.42	153000	47.3	<69	2.52	0.06	<4.4	224.1	456800	0.463	1.33	<0.04	0.0062	10.97	0.0236	0.335	0.73	0.39	4.05	1.182	15.06	6.2	35.92	8.71	102.8	26.82	11070	0.097
AM18 LHG	CORE	AM18 LHG CORE	190502	190502_216_LC141	LC141	30	10	3.5	0.181	0.013	0.02668	0.00061	0.31011	0.0488	0.0031	168	11	169.7	3.8	130	130	9.7	153000	163	<64	13.33	0.74	<4.6	572	461000	0.754	1.24	<0.04	0.0191	16.7	0.116	1.79	3.69	0.96	16.7	4.54	51.4	18.1	86.6	18.1	173	35	9880	0.226
AM18 LHG	RIM	AM18 LHG RIM	190502	190502_217_LC142	LC142	30	10	3.5	0.178	0.015	0.02713	0.00059	0.30041	0.0491	0.0038	165	12	172.5	3.7	110	160	0.54	153000	60	<65	3.35	0.226	<4.9	304	463400	0.453	1.26	<0.051	<0.0044	11.26	0.0414	0.69	1.29	0.557	6.82	1.99	24	9.02	47.5	10.62	111.5	26.43	11250	0.109
AM18 LHG	CORE	AM18 LHG CORE	190502	190502_218_LC143	LC143	30	10	3.5	0.184	0.017	0.027	0.00067	0.27659	0.0488	0.0039	171	14	171.7	4.2	150	180	40.2	153000	123.2	<80	4.52	0.505	<5.6	424	448300	0.773	1.11	0.182	0.106	15.64	0.051	0.81	1.79	0.518	8.86	2.79	34	12.44	67	14.37	145.6	31.5	10930	0.241
AM18 LHG	RIM	AM18 LHG RIM	190502	190502_219_LC144	LC144	30	10	3.5	0.187	0.0076	0.0268	0.00041	0.049731	0.0513	0.0022	173.7	6.5	170.5	2.6	226	94	0.33	153000	51.9	<57	2.56	0.072	<4.4	203.4	466700	0.48	1.17	<0.04	0.0027	17.01	0.0265	0.47	1.02	0.459	4.47	1.225	14.75	5.73	31.59	7.34	83.5	21.4	11240	0.11
AM18 LHG	CORE	AM18 LHG CORE	190502	190502_221_LC145	LC145	30	10	3.5	0.19	0.012	0.02805	0.00058	0.20753	0.0498	0.0031	176	10	178.3	3.6	150	130	2.89	153000	186.2	<61	23	0.448	<4.4	414	468600	0.755	1.31	<0.048	0.0037	10.08	0.075	1.42	2.43	0.526	11.63	3.32	37.8	12.96	63.6	12.86	122.5	25.37	9870	0.276
AM18 LHG	RIM	AM18 LHG RIM	190502	190502_222_LC146	LC146	30	10	3.5	0.171	0.013	0.02736	0.0005	0.11517	0.0468	0.0038	162	12	174	3.2	10	150	3.72	153000	163	<72	18.94	0.348	<4.4	349	460900	0.756	1.38	<0.053	<0.0032	10.24	0.0444	0.89	1.99	0.391	9.06	2.597	31.48	10.86	53.1	11.31	110.4	22.72	10470	0.287
AM18 LHG	CORE	AM18 LHG CORE	190502	190502_223_LC147	LC147	30	10	3.5	0.187	0.012	0.02702	0.00055	0.1658	0.0502	0.003	173.3	9.9	171.8	3.5	190	130	<0.31	153000	112.5	<58	5.9	0.301	<4.4	702	461200	0.563	1.31	<0.041	0.0055	16.86	0.0975	1.82	4.34	1.268	20.1	5.51	62.8	21.6	104.8	21.65	205.6	42.8	10790	0.177
AM18 LHG	RIM	AM18 LHG RIM	190502	190502_224_LC148	LC148	30	10	3.5	0.1796	0.0083	0.02608	0.00035	0.090655	0.0506	0.0024	167.4	7.1	165.9	2.2	190	100	<0.3	153000	53.7	<61	3.1	0.057	<4.3	477.2	467600	0.604	1.26	<0.047	0.0074	17.81	0.083	1.31	2.42	1.049	10.8	2.96	35.7	13.35	73	16.81	180.4	43.82	11040	0.14
AM18 LHG	CORE	AM18 LHG CORE	190502	190502_226_LC149	LC149	30	10	3.5	0.18	0.012	0.02592	0.0005	0.16044	0.0509	0.0033	167	10	164.9	3.1	190	130	12	153000	109.5	<63	4.59	0.66	<4.6	561	463400	1.032	1.28	<0.054	0.0475	22.6	0.0665	1.25	2.45	0.727	12.53	3.82	46.1	17	88.1	18.7	187	39.1	11480	0.302
AM18 LHG	RIM	AM18 LHG RIM	190502	190502_227_LC150	LC150	30	10	3.5	0.185	0.014	0.02747	0.00052	0.18804	0.0494	0.0036	171	12	174.7	3.3	120	150	8.3	153000	60.1	<65	3.51	0.11	<4.5	194.1	464000	0.441	1.3	0.09	0.0064	12.02	0.015	0.209	0.72	0.281	3.86	1.135	14	5.65	30.53	7.27	78.5	18.96	11380	0.118
AM18 LHG	CORE	AM18 LHG CORE	190502	190502_228_LC151	LC151	30	10	3.5	0.1941	0.0073	0.02662	0.00034	0.45356	0.0532	0.0018	179.9	6.2	169.4	2.1	318	74	305	153000	302	246	9	0.718	10.7	1152	457900	1.76	1.3	3.65	0.86	44.5	0.417	4.86	6.84	1.69	31.9	8.87	101.8	35.4	172.5	35.4	332	68.6	11040	0.495
AM18 LHG	RIM	AM18 LHG RIM	190502	190502_229_LC152	LC152	30	10	3.5	0.187	0.01	0.02768	0.00034	0.17462	0.0496	0.0027	173.3	8.9	176	2.1	150	120	0.95	153000	63.8	<61	3.49	0.074	<4.4	215.6	467900	0.511	1.34	<0.063	0.0063	15.55	0.0257	0.421	0.843	0.419	4.36	1.276	15.72	6.17	34.5	8.03	86.3	21.63	11310	0.132
AM18 LHG	CORE	AM18 LHG CORE	190502	190502_231_LC153	LC153	30	10	3.5	0.185	0.012	0.0283	0.0019	0.56915	0.0492	0.003	172	11	180	12	200	170	48	153000	53	<79	4.67	0.77	106	460	475000	0.86	1.85	0.37	0.307	29.1	0.13	1.18	1.57	0.66	7.3	2.1	29.6	12.1	74	20.3	267	60	11380	0.23
AM18 LHG	RIM	AM18 LHG RIM	190502	190502_232_LC154	LC154	30	10	3.5	0.1809	0.0081	0.02603	0.00046	0.15574	0.0511	0.0024	168.5	7	165.7	2.9	215	99	0.51	153000	45.6	<59	2.97	<0.044	<4.5	213.9	462900	0.448	1.3	<0.01	0.0055	15.29	0.027	0.44	0.94	0.423	4.46	1.309	15.42	6.07	33.9	7.92	88.6	23.06	11160	0.1
AM18 LHG	CORE	AM18 LHG CORE	190502	190502_233_LC155	LC155	30	10	3.5	0.187	0.011	0.02713	0.00042	0.34911	0.0504	0.0027	173.3	9	172.6	2.6	180	110	4.1	153000	155.4	<61	5.16	0.15	<4.5	842	458000	1.363	1.21	<0.04	0.0098	38.05	0.129	2.33	4.62	1.742	19.88	5.47	68.1	25.09	129.2	27.57	273.2	59.4	9740	0.344
AM18 LHG	CORE	AM18 LHG CORE	190502	190502_234_LC156	LC156	30	10	3.5	0.205	0.016	0.02725	0.00055	0.10165	0.0553	0.0044	188	14	173.3	3.4	340	170	0.94	153000	130.7	<56	8.07	0.282	<4.4	353.9	472800	0.674	1.21	0.012	<0.0038	13.29	0.0251	0.59	1.37	0.433	7.28	2.279	28.16	10.64	55.2	12.08	121.5	25.99	10900	0.246
AM18 LHG	RIM	AM18 LHG RIM	190502	190502_236_LC157	LC157	30	10	3.5	0.1746	0.0094	0.02667	0.0005	0.067586	0.0482	0.0026	162.9	8.1	169.7	3.1	90	110	0.54	153000	47.9	<59	2.8	0.076	<4.2	212.7	469300	0.464	1.27	<0.04	0.0077	12.4	0.0179	0.38	0.81	0.364	3.93	1.172	14.84	6.01	34.3	8.14	93.3	23.5	11310	0.125
AM18 LHG	CORE	AM18 LHG CORE	190502	190502_237_LC158	LC158	30	10	3.5	0.188	0.024	0.0272	0.00086	0.16023	0.0508	0.0064	174	20	173	5.4	160	260	36	153000	149	<83	6.46	0.369	<6	645	454700	0.576	1.27	0.32	0.028	15.82	0.088	1.99	3.82	1.168	17.94	4.81	56.7	19.9	99.6	19.94	190.8	40.93	10140	0.184
AM18 LHG	RIM	AM18 LHG RIM	190502	190502_238_LC159	LC159	30	10	3.5	0.1936	0.0093	0.0268	0.00048	0.1871	0.0531	0.0025	179.2	7.9	170.5	3	300	100	1.22	153000	64.2	<61	3.48	0.089	<4.5	370	463500	0.65	1.18	0.063	0.0219	19.2	0.0352	0.68	1.31	0.607	6.77	2.08	25.8	10.39	58.6	13.82	152.6	37.4	10930	0.162
AM18 LHG	CORE	AM18 LHG CORE	190502	190502_239_LC160	LC160	30	10	3.5	0.198	0.02	0.0277	0.0013	0.11944	0.053	0.0056	183	17	175.9	8.2	280	230	1.1	153000	132	280	4.26	0.185	<5.8	698	546000	0.504	1.39	<0.073	0.67	25.9	0.34	3.41	5.7	2.01	20.6	5.39	61.7	21.8	105	22.5	240	45.5	11190	0.167
AM18 LHG	RIM	AM18 LHG RIM	190502	190502_246_LC161	LC161	30	10	3.5	0.188	0.015	0.02617	0.00079	0.24789	0.0528	0.0042	174	13	166.5	4.9	290	180	34	153000	68	<100	3.49	1.35	<6.7	294.9	444000	0.615	1.15	0.25	0.081	18.59	0.0215	0.38	1.45	0.466	6.5	1.9	24.05	8.93	47.3	10.62	105	23.62	10800	0.187
AM18 LHG	CORE	AM18 LHG CORE	190502	190502_247_LC162	LC162	30	10	3.5	0.18	0.015	0.02606	0.0007	0.026977	0.0511	0.0043	168	13	165.8	4.4	220	190	<0.51	153000	147	<98	4.63	0.351	<6.7	794	452200	0.855	1.3	<0.083	0.0093	20.97	0.114	2.06	4.39	1.16	19.09	5.95	67.7	24.23	122.3	25.01	245.6	51.8	11000	0.264
AM18 LHG	RIM	AM18 LHG RIM	190502	190502_248_LC163	LC163	30	10	3.5	0.172	0.012	0.02713	0.00084	0.40273	0.0475	0.0035	160	10	172.6	5.3	60	150	<0.34	153000	49.3	<73	3.08	<0.055	<5	242	483000	0.496	1.28	<0.052	<0.0033	14.19	0.0219	0.4	0.92	0.454	4.88	1.407	17.58	6.97	39.2	9.34	104.3	25.2	11210	0.106
AM18 LHG	CORE	AM18 LHG CORE	190502	190502_249_LC164	LC164	30	10	3.5	0.217	0.023	0.0277	0.0014	0.18025	0.0586	0.0076	199	19	175.9	8.6	450	260	9.5	153000	92.2	<73	3.43	<0.056	<5.4	351	524000	0.516	1.31	0.27	0.074	13.67	0.046	0.68	1.54	0.7	7.11	2.03	26.5	10.61	54.9	13.24	146.5	31.3	10330	0.116
AM18 LHG	RIM	AM18 LHG RIM	190502	190502_251_LC165	LC165	30	10	3.5	0.175	0.014	0.02694	0.00069	0.067292	0.0478	0.0039	163	12	171.4	4.3	70	170	0.6	153000	78.2	<83	3.78	0.1	<5.1	330.9	456000	0.634	1.2	<0.056	0.0057	21.43	0.0421	1.06	1.83	0.803	8.14	2.232	26.89	9.89	51.7	10.84	110.9	24.49	10030	0.136
AM18 LHG	CORE	AM18 LHG CORE	190502	190502_252_LC166	LC166	30	10	3.5	0.242	0.023	0.02747	0.00079	0.040933	0.065	0.0066	218	19	174.7	5	660	220	4.52	153000	196.7	<67	14.1	0.379	<5	439	456200	0.602	1.35	<0.053	0.087	12.32	0.089	1.58	2.85	0.752	11.32	3.3	38.2	13.26	65.3	13.65	136.8	29.45	9440	0.214
AM18 LHG	RIM	AM18 LHG RIM	190502	190502_253_LC167	LC167	30	10	3.5	0.184	0.012	0.0269	0.00037	0.068579	0.0504	0.0032	171	10	171.1	2.3	170	130	0.35	153000	45.8	<65	3.1	0.059	<4.6	199	468000	0.44	1.14	<0.041	<0.0032	13.91	0.0172	0.43	0.76	0.327	4.05	1.162	14.75	5.95	33.1	7.62	82.6	19.86	11630	0.138
AM18 LHG	CORE	AM18 LHG CORE	190502	190502_254_LC168	LC168	30	10	3.5	0.176	0.029	0.02829	0.00096	0.23809	0.0457	0.0072	162	24	179.8	6	-90	280	8.8	153000	114.6	<71	9.68	0.183	11.1	196.6	457000	0.503	1.26	<0.051	<0.0036	7.9	0.0156	0.256	0.78	0.256	3.92	1.21	16.08	5.91	31.5	7	71.3	15.71	10700	0.132
AM18 LHG	RIM	AM18 LHG RIM	190502	190502_256_LC169	LC169	30	10	3.5	0.183	0.018	0.02716	0.00077	0.069914	0.0494	0.0049	170	15	172.8	4.8	130	200	<0.35	153000	57.9	<79	3.42	0.114	<5.1	186.4	483000	0.492	1.32	<0.077	<0.0039	13.12	0.0129	0.255	0.9	0.374	3.75	1.152	14.76	5.6	30.3	7.02	74.9	17.64	11910	0.137
AM18 LHG	CORE	AM18 LHG CORE	190502	190502_257_LC170	LC170	30	10	3.5	0.188	0.018	0.0271	0.0011	0.45949	0.051	0.0045	175	16	172.1	6.6	200	180	<0.4	153000	137	<79	6.43	0.349	<5.2	866	481000	0.681	1.25	<0.026	0.011	20.6	0.162	3.19	6.07	1.78	26.7	7.11	79	27.3	134.2	26.7	258	52.3	11000	0.229
AM18 LHG	RIM	AM18 LHG RIM	190502	190502_258_LC171	LC171	30	10	3.5	0.1864	0.0093	0.02619	0.00056	0.16933	0.0523	0.0027	173.2	8	166.6	3.5	270	110	3.67	153000	54.2	<63	3.7	0.107	12.5	414	477500	0.643	1.37	0.19	0.0297	20.7	0.0738	0.96	1.59	0.804	7.87	2.2	27.7	11.08	62	14.71	162.2	42.1	11620	0.138
AM18 LHG	CORE	AM18 LHG CORE	190502	190502_259_LC172	LC172	30	10	3.5	0.2144	0.0086	0.02662	0.00042	0.027781	0.0592	0.0025	196.8	7.2	169.4	2.6	540	95	1.04	153000	154.2	<71	7.02	0.365	<4.1	807	466100	0.978	1.08	<0.054	0.0086	25.88	0.107	2.24	4.17	1.21	19.6	5.69	68.2	24.6	121.9	25.3	247	51.3	10600	0.316
AM18 LHG	RIM	AM18 LHG RIM	190502	190502_261_LC173	LC173	30	10	3.5	0.203	0.025	0.02602	0.00082	0.07388	0.0576	0.0072	186	21	165.6	5.2	430	280	26.9	153000	111	<94	4.78	0.132	<6.9	305.3	453400	0.684	1.09	0.16	0.0084	15.35	0.015	0.32	1.31	0.364	6.18	1.99	24.59	9.41	49.5	10.64	107.7	22.94	11210	0.242
AM18 LHG	CORE	AM18 LHG CORE	190502	190502_262_LC174	LC174	30	10	3.5	0.234	0.026	0.028	0.0013	0.6424	0.0657	0.009	213	21	178.2	8.4	710	260	12.1	153000	81	<80	3.59	0.178	23	295	520000	0.476	1.3	0.17	0.045	12.5	0.041	0.54	1.06	0.449	5.28	1.57	20.3	8.3	46.7	11.7	134	35.2	12230	0.112
AM18 LHG	RIM	AM18 LHG RIM	190502	190502_263_LC175	LC175	30	10	3.5	0.1801	0.0091	0.02624	0.00037	0.19955	0.0504	0.0026	167.7	7.8	166.9	2.3	180	110	0.56	153000	54.6	<64	3.2	0.052	<4.5	237.3	466900	0.447	1.13	<0.048	<0.0024	16.1	0.0271	0.58	1.05	0.529	5.23	1.46	17.41	6.67	36.3	8.46	93	24.35	11100	0.081
AM18 LHG	CORE	AM18 LHG CORE	190502	190502_264_LC176	LC176	30	10	3.5
AM18 LHG	RIM	AM18 LHG RIM	190502	190502_266_LC177	LC177	30	10	3.5	0.1806	0.0078	0.02665	0.00056	0.28071	0.0498	0.0021	168.3	6.7	169.6	3.5	166	89	1.19	153000	65	<61	3.65	0.114	<4.1	341	467600	0.671	1.23	<0.055	0.0038	22.6	0.0369	0.73	1.5	0.61	7.7	2.17	25.8	9.7	52.3	11.69	123.8	29.5	11360	0.165
AM18 LHG	CORE	AM18 LHG CORE	190502	190502_267_LC178	LC178	30	10	3.5	0.192	0.053	0.0276	0.0013	0.0075056	0.051	0.014	176	45	175.4	8.1	120	510	2.79	153000	150	<110	8.2	0.69	<8.3	245	444600	0.595	1.69	<0.15	0.038	12.04	0.034	0.38	1.04	0.213	5.16	1.64	19.4	7.43	39.9	8.53	83.4	18.48	10620	0.22
AM18 LHG	RIM	AM18 LHG RIM	190502	190502_268_LC179	LC179	30	10	3.5	0.172	0.01	0.02516	0.00057	0.076948	0.0504	0.003	161.1	8.7	160.2	3.6	190	130	<0.38	153000	78.6	<67	3.68	0.169	<5.6	478	453600	0.953	1.26	<0.064	0.0049	25.77	0.0442	0.73	1.65	0.811	9.28	2.725	34.63	13.73	73.6	16.53	172.3	41.6	10560	0.19
AM18 LHG	CORE	AM18 LHG CORE	190502	190502_269_LC180	LC180	30	10	3.5	0.2	0.013	0.02845	0.00062	0.14683	0.0518	0.0037	184	11	180.8	3.9	240	150	0.39	153000	104	<65	4.91	0.193	<4.6	380.8	477100	0.759	1.1	<0.047	<0.00074	20.24	0.0267	0.66	1.66	0.507	7.96	2.4	30.52	11.45	59	12.8	129.1	28.6	11640	0.238
AM18 LHG	RIM	AM18 LHG RIM	190502	190502_276_LC181	LC181	30	10	3.5	0.186	0.019	0.0268	0.00087	0.60515	0.051	0.0047	173	16	170.5	5.5	200	190	0.91	153000	57	<110	2.86	<0.074	<7.3	229.8	444000	0.446	1.01	0.13	<0.0042	15.54	0.029	0.54	1.04	0.413	4.81	1.364	16.61	6.57	36.6	8.28	91	22.44	10560	0.112
AM18 LHG	CORE	AM18 LHG CORE	190502	190502_277_LC182	LC182	30	10	3.5
AM18 LHG	RIM	AM18 LHG RIM	190502	190502_278_LC183	LC183	30	10	3.5	0.191	0.021	0.0285	0.0013	0.070048	0.0498	0.0059	177	18	180.9	7.9	140	240	73.6	153000	202	<87	18.8	0.86	109	521	449700	0.701	1.1	0.5	0.0075	11.54	0.089	1.6	2.65	0.824	12.25	3.48	42.9	15.35	81.8	18.2	187.3	42.3	8980	0.236
AM18 LHG	RIM	AM18 LHG RIM	190502	190502_279_LC184	LC184	30	10	3.5	0.2	0.02	0.02726	0.00068	0.13342	0.0541	0.0052	184	17	173.3	4.2	280	200	2.34	153000	156.3	<69	10.8	0.256	<4.2	359.8	465800	0.643	1.09	<0.06	<0.0028	11.59	0.0332	0.69	1.63	0.485	8.26	2.477	30.29	10.9	55.44	11.86	118.1	25.62	10200	0.212
AM18 LHG	CORE	AM18 LHG CORE	190502	190502_281_LC185	LC185	30	10	3.5	0.173	0.01	0.0267	0.00048	0.18951	0.0476	0.0028	161.4	8.9	169.9	3	60	120	<0.31	153000	80	<63	3.77	0.198	<4.2	776	466000	0.505	1.19	0.016	0.0061	21.7	0.133	2.46	4.99	1.62	21.7	5.9	68.4	23.8	118	24.6	243	52.6	11490	0.192
AM18 LHG	RIM	AM18 LHG RIM	190502	190502_282_LC186	LC186	30	10	3.5	0.181	0.01	0.02741	0.00049	0.083264	0.0486	0.0028	168.4	8.8	174.3	3	110	120	0.46	153000	46.5	<68	2.31	<0.041	<4.5	179.4	463600	0.371	1.05	<0.059	<0.0027	10.97	0.0182	0.343	0.522	0.346	3.28	0.946	12.05	4.88	29.28	7.04	81.3	22.37	11470	0.086
AM18 LHG	CORE	AM18 LHG CORE	190502	190502_283_LC187	LC187	30	10	3.5	0.2	0.018	0.0277	0.0011	0.46382	0.0532	0.0042	185	15	175.9	6.8	310	180	1.22	153000	37	<81	2.73	0.151	<5.7	227	505000	0.423	1	<0.086	0.006	11.2	0.0119	<0.092	0.68	0.347	3.71	1.13	13.9	5.93	34.9	8.41	98	26.8	12500	0.085
AM18 LHG	RIM	AM18 LHG RIM	190502	190502_284_LC188	LC188	30	10	3.5	0.183	0.023	0.02786	0.00064	0.16955	0.0482	0.0059	169	19	177.1	4	60	240	44	153000	31.4	<91	1.7	<0.061	<6.1	44.1	451300	0.241	0.93	<0.099	0.202	4.09	0.0069	<0.056	0.118	0.047	0.58	0.172	2.26	1.096	7.06	1.91	23.31	7.16	11890	0.039
AM18 LHG	CORE	AM18 LHG CORE	190502	190502_286_LC189	LC189	30	10	3.5	0.2004	0.0048	0.02725	0.00034	0.14569	0.0539	0.0014	185.4	4.1	173.3	2.1	359	59	16	153000	177.5	<72	7.65	1.01	116	2870	470800	1.37	2.55	0.24	0.192	101.9	0.322	4.1	5.85	3.25	34.4	10.09	146	68.6	434	106.3	1233	329	7490	0.138
AM18 LHG	RIM	AM18 LHG RIM	190502	190502_287_LC190	LC190	30	10	3.5	0.1851	0.0082	0.02757	0.00054	0.049058	0.0491	0.0023	172.1	7	175.3	3.4	140	100	12.1	153000	51.4	<60	2.56	0.056	<4.5	215.2	462800	0.377	1.1	0.077	0.0082	12.37	0.0259	0.39	0.765	0.389	3.91	1.187	15.02	6.16	33.7	8.26	92.8	24.17	11240	0.079
AM18 LHG	CORE	AM18 LHG CORE	190502	190502_288_LC191	LC191	30	10	3.5	0.218	0.013	0.02848	0.00075	0.33669	0.0563	0.0034	200	11	181	4.7	440	130	36.4	153000	104	<82	9.2	0.532	59	660	501000	0.607	1.33	1.19	0.0377	18.8	0.169	2.45	4.19	1.43	16.5	4.53	53.4	19.3	100.8	21.34	219.2	49.3	11720	0.194
AM18 LHG	CORE	AM18 LHG CORE	190502	190502_289_LC192	LC192	30	10	3.5	0.179	0.02	0.02756	0.00061	0.22169	0.0479	0.0056	167	17	175.2	3.8	70	240	1.04	153000	151	<91	7.2	0.216	<6.4	680	463300	1.08	1.24	<0.083	0.0064	24.4	0.066	1.23	2.57	0.88	14.6	4.47	55.6	20.7	108	22.6	224	47.4	10290	0.283
AM18 LHG	RIM	AM18 LHG RIM	190502	190502_291_LC193	LC193	30	10	3.5	0.185	0.01	0.02735	0.00041	0.018364	0.0499	0.0028	171.9	8.7	173.9	2.6	160	120	5.1	153000	48.4	<68	2.78	<0.053	<4.6	164.4	475000	0.401	1.1	0.022	0.018	12.11	0.018	0.36	0.63	0.268	3.04	0.887	11.71	4.52	26.01	6.15	73.2	18.41	11810	0.092
AM18 LHG	CORE	AM18 LHG CORE	190502	190502_292_LC194	LC194	30	10	3.5	0.185	0.02	0.02772	0.00079	0.092057	0.0493	0.0056	172	17	176.2	5	100	220	1.93	153000	133	<84	7.72	0.275	<5.4	585	453000	0.48	1.06	<0.046	0.0042	13.24	0.091	1.78	3.89	1.26	15.89	4.51	50.9	17.6	87.7	17.91	174.6	37.1	10290	0.17
AM18 LHG	RIM	AM18 LHG RIM	190502	190502_293_LC195	LC195	30	10	3.5	0.206	0.013	0.02802	0.00047	0.27947	0.0532	0.0032	189	11	178.1	3	310	130	34	153000	51.1	<64	3.88	0.724	<4.5	261.6	466000	0.504	1.57	0.24	0.0429	14.88	0.0292	0.402	0.97	0.443	4.95	1.481	18.73	7.45	41.4	9.58	104.6	26.1	11290	0.139
AM18 LHG	CORE	AM18 LHG CORE	190502	190502_294_LC196	LC196	30	10	3.5
AM18 LHG	RIM	AM18 LHG RIM	190502	190502_296_LC197	LC197	30	10	3.5	0.172	0.011	0.02664	0.00056	0.33738	0.0474	0.0029	160.9	9.4	169.5	3.5	60	130	0.44	153000	51.9	<78	3.25	0.067	<5.4	236.4	454100	0.486	1	<0.077	<0.0053	14.52	0.0222	0.36	0.87	0.345	4.39	1.348	17.27	6.69	37.3	8.79	95.3	24.1	11130	0.143
AM22	CORE	AM22 CORE	190502	190502_297_LC198	LC198	30	10	3.5	0.182	0.016	0.02676	0.00052	0.029448	0.0501	0.0045	168	14	170.2	3.2	130	180	0.67	153000	172	<64	11.78	0.606	<4.4	711.5	459000	0.464	1.11	<0.055	0.0094	17.86	0.231	4.38	7.15	2.005	27.56	6.81	71.5	22.43	100.8	19.9	179.6	36.38	10030	0.184
AM22	RIM	AM22 RIM	190502	190502_298_LC199	LC199	30	10	3.5	0.247	0.032	0.02661	0.00084	0.0046126	0.0686	0.0092	222	25	169.3	5.2	770	250	28.9	153000	72.9	<97	4.82	1.38	<6.5	236	455400	0.559	8.24	0.26	0.0103	13.65	0.019	0.37	0.8	0.264	4.34	1.441	18.5	7.3	38.8	8.66	88.3	19.9	11360	0.194
AM22	CORE	AM22 CORE	190502	190502_299_LC200	LC200	30	10	3.5	0.196	0.019	0.0268	0.00076	0.029555	0.0543	0.0056	181	16	170.5	4.8	290	210	0.54	153000	135.6	<72	7.2	0.237	<5.5	460	451200	0.529	1.03	<0.016	<0.004	12.06	0.0464	1.04	2.33	0.77	11.26	3.26	38.4	13.98	70.6	14.48	146.2	30.72	10140	0.185
AM22	RIM	AM22 RIM	190502	190502_306_LC201	LC201	30	10	3.5	0.182	0.013	0.02586	0.00047	0.20648	0.0507	0.0032	169	11	164.6	2.9	220	140	3.63	153000	56.2	<64	3.25	0.131	7.1	226	465200	0.484	1.19	<0.046	0.0071	13.87	0.0258	0.46	0.81	0.402	4.16	1.156	15.7	6.29	36.2	8.81	99.4	24.6	11380	0.116
AM22	CORE	AM22 CORE	190502	190502_307_LC202	LC202	30	10	3.5
AM22	RIM	AM22 RIM	190502	190502_308_LC203	LC203	30	10	3.5	0.168	0.0096	0.02607	0.00067	0.22791	0.0474	0.0028	157.5	8.3	165.9	4.2	60	120	<0.56	153000	89	<120	4.33	0.165	<7.8	551	444300	0.91	1.21	<0.12	<0.0048	34.8	0.055	0.92	2.38	1.04	12.63	3.74	43.4	16.28	85.6	18.1	187	44	10470	0.205
AM22	CORE	AM22 CORE	190502	190502_309_LC204	LC204	30	10	3.5	0.2	0.012	0.02867	0.00054	0.27737	0.0511	0.0031	184	11	182.2	3.4	200	130	36	153000	88.5	<65	5.01	0.183	<4.4	412	464900	0.93	1.11	0.6	0.055	17.24	0.0418	0.89	1.56	0.594	8.04	2.44	30.1	11.9	66.5	15.34	164.4	39.1	11110	0.324
AM22	RIM	AM22 RIM	190502	190502_311_LC205	LC205	30	10	3.5	0.1859	0.0077	0.02714	0.00073	0.28029	0.0504	0.0021	172.9	6.6	172.6	4.6	200	95	84	153000	78.5	<67	7.6	0.577	4.5	479	497000	0.996	3.03	0.49	0.04	45.2	0.103	1.32	2.9	1.42	13.69	3.45	38.6	14.12	73.3	15.99	171.9	40.2	11440	0.216
AM22	CORE	AM22 CORE	190502	190502_312_LC206	LC206	30	10	3.5	0.184	0.015	0.02615	0.00077	0.15591	0.052	0.0045	171	13	166.4	4.8	230	170	13	153000	94	<91	4	0.21	<5.7	577	451200	0.81	1.21	0.08	0.015	27.3	0.126	2.24	4.22	1.34	17.9	4.77	52.1	17.8	86.7	17.94	175.1	36.9	11490	0.203
AM22	RIM	AM22 RIM	190502	190502_313_LC207	LC207	30	10	3.5	0.1932	0.0091	0.02666	0.00098	0.23575	0.0524	0.0027	179.2	7.7	169.6	6.2	330	140	3.9	153000	73.5	<78	5.05	0.091	8	434	491000	0.96	2.39	<0.08	0.0058	39	0.076	1.25	2.87	1.49	11.69	2.81	32.6	11.87	60.8	14.49	164	39.6	10620	0.148
AM22	CORE	AM22 CORE	190502	190502_314_LC208	LC208	30	10	3.5	0.187	0.015	0.02719	0.00057	0.18437	0.0506	0.004	173	13	172.9	3.6	160	160	0.38	153000	100	<62	4.25	0.192	<4.4	455	462000	0.57	1.19	<0.06	<0.0033	14.3	0.052	0.87	2.16	0.59	10.5	3.12	38	13.6	69	14.6	147	31.3	11530	0.179
AM22	RIM	AM22 RIM	190502	190502_316_LC209	LC209	30	10	3.5	0.1724	0.0096	0.02584	0.00058	0.41517	0.0488	0.0025	161.3	8.3	164.4	3.7	130	110	10.2	153000	72.8	<76	3.59	0.153	<4.8	280.3	486000	0.59	1.3	<0.025	0.126	21.57	0.055	0.72	1.31	0.64	5.98	1.77	20.89	7.79	43.4	9.73	108.8	26.38	12250	0.161
AM22	CORE	AM22 CORE	190502	190502_317_LC210	LC210	30	10	3.5	0.182	0.015	0.02759	0.00054	0.17026	0.0482	0.0042	169	13	175.5	3.4	70	170	0.95	153000	43.3	<57	2.8	0.076	<4.6	259	454900	0.381	1.07	<0.046	0.0045	9.52	0.0323	0.74	1.36	0.57	7.1	1.99	22.9	8	40	8.6	88.7	20.3	11390	0.099
AM22	RIM	AM22 RIM	190502	190502_318_LC211	LC211	30	10	3.5	0.1925	0.0094	0.02775	0.00047	0.0086951	0.0505	0.0025	178.3	8	176.5	2.9	210	110	12.4	153000	51.4	<64	7.6	0.226	4.7	201	457700	0.464	4.57	0.206	0.0351	16.1	0.0477	0.48	0.98	0.615	4.56	1.23	14.6	5.7	30.1	6.87	79.4	21.1	10960	0.087
AM22	CORE	AM22 CORE	190502	190502_319_LC212	LC212	30	10	3.5
AM22	RIM	AM22 RIM	190502	190502_321_LC213	LC213	30	10	3.5	0.1743	0.0083	0.02571	0.00048	0.0429	0.0492	0.0023	162.8	7.2	163.6	3	150	100	38	153000	104.8	<63	4.65	0.209	<4.4	556	457000	1.302	1.01	<0.011	0.046	33.1	0.0545	0.95	2.27	0.728	12.13	3.61	45.2	16.4	86.2	18.93	190.3	41.4	11280	0.386
AM22	CORE	AM22 CORE	190502	190502_322_LC214	LC214	30	10	3.5	0.1846	0.0091	0.02721	0.00043	0.041186	0.0499	0.0026	171.6	7.8	173	2.7	160	110	13.4	153000	63.3	<65	3.04	0.098	<4	509	469200	0.401	1.46	0.19	0.0187	14.08	0.134	2.09	3.44	1.41	13.03	3.44	39.4	14.55	76.7	17.14	184.7	44.5	10570	0.093
AM22	RIM	AM22 RIM	190502	190502_323_LC215	LC215	30	10	3.5	0.203	0.02	0.02772	0.00051	0.040468	0.0539	0.0054	187	17	176.3	3.2	290	200	2.05	153000	73.2	<88	2.41	<0.064	<5.9	256	455800	0.349	1.09	<0.082	<0.0059	10.56	0.0148	0.45	0.83	0.368	4.21	1.27	17.5	7.01	42.6	10.01	118.2	30.6	10780	0.093
AM22	CORE	AM22 CORE	190502	190502_324_LC216	LC216	30	10	3.5
AM22	RIM	AM22 RIM	190502	190502_326_LC217	LC217	30	10	3.5	0.1717	0.0062	0.026	0.00032	0.10675	0.0489	0.0019	160.7	5.4	165.4	2	127	84	0.43	153000	59.2	<62	2.84	0.096	<4.1	223.4	473900	0.604	1	<0.058	0.0058	18.66	0.0283	0.46	1.12	0.478	4.81	1.364	16.93	6.33	35.25	8.14	91.2	22.13	11850	0.186
AM22	CORE	AM22 CORE	190502	190502_327_LC218	LC218	30	10	3.5	0.19	0.018	0.02689	0.00061	0.13209	0.0521	0.005	176	15	171.1	3.8	230	200	74	153000	149	<80	10.71	0.378	<5.3	482	466300	0.606	1.1	0.31	0.037	14.13	0.084	1.13	2.51	0.774	12.4	3.44	41.4	14.31	72.6	15.09	147.1	31.52	10220	0.206
AM22	RIM	AM22 RIM	190502	190502_328_LC219	LC219	30	10	3.5	0.1805	0.0076	0.02624	0.00038	0.20302	0.0503	0.0021	168.2	6.5	167	2.4	206	95	1.07	153000	96.7	<60	5.03	0.181	<4.2	390	476600	0.817	1.17	<0.041	0.0041	22.46	0.0361	0.66	1.64	0.569	7.95	2.41	30.1	11.12	59.9	13.48	141.4	32.32	11490	0.266
AM22	CORE	AM22 CORE	190502	190502_329_LC220	LC220	30	10	3.5	0.192	0.02	0.0293	0.0012	0.059229	0.0487	0.0059	177	17	185.9	7.6	90	240	0.41	153000	71.7	<72	5.06	0.176	<4.6	472	508000	0.519	1.12	<0.044	0.0038	17.2	0.045	1.22	2.47	0.86	12.2	3.28	39.7	14.29	71.1	15.77	156	31.1	11720	0.151
AM22	RIM	AM22 RIM	190502	190502_336_LC221	LC221	30	10	3.5	0.1762	0.0085	0.02668	0.00046	0.18977	0.0484	0.0023	164.4	7.3	169.8	2.9	100	100	<0.32	153000	99.5	<60	4.07	0.153	<4.3	421.7	464500	0.783	1.07	<0.057	0.0015	25.61	0.0491	0.92	2.01	0.652	9.64	2.859	34.9	12.48	65.1	14	141.1	30.17	11220	0.249
AM22	CORE	AM22 CORE	190502	190502_337_LC222	LC222	30	10	3.5	0.194	0.017	0.02612	0.00091	0.039982	0.0547	0.0048	180	15	166.2	5.7	350	190	98	153000	121	<73	7.83	1.74	<4.6	760	486000	0.88	1.21	1.3	0.037	26.3	0.176	2.54	5.37	1.35	23.1	6.2	71	24	116	23	216	43	10940	0.275
AM22	RIM	AM22 RIM	190502	190502_338_LC223	LC223	30	10	3.5	0.198	0.012	0.02678	0.00056	0.022653	0.0545	0.0036	183	10	170.4	3.5	330	140	5.1	153000	109	<56	7.17	0.234	<4	296.6	476700	0.629	1.04	<0.047	0.0064	14.6	0.0225	0.5	1.16	0.392	6.15	1.911	23.8	9.08	46.7	10.08	103.4	22.51	11610	0.225
AM22	CORE	AM22 CORE	190502	190502_339_LC224	LC224	30	10	3.5	0.183	0.01	0.02748	0.00048	0.020747	0.0488	0.0028	169.7	8.9	174.7	3	120	120	<0.29	153000	183.4	<58	10.02	0.372	<4.4	928	478400	0.597	1.07	<0.048	0.028	17.91	0.227	3.8	6.43	1.7	27	7.52	85.9	28.75	138.9	27.78	257.7	52.7	10750	0.225
AM22	RIM	AM22 RIM	190502	190502_341_LC225	LC225	30	10	3.5	0.182	0.017	0.0263	0.00054	0.0040227	0.0507	0.0049	169	15	167.3	3.4	170	200	<0.39	153000	144.2	<77	7.8	0.281	<5.3	612	462500	0.989	0.98	<0.094	<0.0037	21.87	0.075	1.21	2.69	0.66	13.5	4.02	50.4	18.22	94.5	19.78	197.9	42.2	10880	0.345
AM22	CORE	AM22 CORE	190502	190502_342_LC226	LC226	30	10	3.5	0.1811	0.0071	0.02635	0.00067	0.61099	0.0511	0.0016	168.8	6.1	167.7	4.2	227	70	40	153000	306	<54	11.95	2.59	<4.2	2610	474300	2.35	11.3	0.125	0.087	57.5	0.595	10.1	18.8	4.78	87	23.3	258	83.8	382	72.7	654	127	10000	0.555
AM22	RIM	AM22 RIM	190502	190502_343_LC227	LC227	30	10	3.5	0.186	0.011	0.02649	0.00042	0.3443	0.051	0.003	172.3	9.8	168.6	2.6	210	130	1.09	153000	58.4	<61	3.63	0.102	<4.3	204	478700	0.534	1.15	<0.032	0.0024	12.55	0.0152	0.259	0.7	0.276	4.04	1.199	15.74	6.08	33.4	7.66	80.3	18.8	11930	0.132
AM22	CORE	AM22 CORE	190502	190502_344_LC228	LC228	30	10	3.5	0.182	0.01	0.02648	0.00044	0.35985	0.05	0.0025	169.6	8.6	168.5	2.8	180	110	1.55	153000	253	<63	11.43	0.407	<4.3	1020	480000	1.557	0.93	0.073	0.0079	30.34	0.107	1.99	4.3	1.5	20.6	6.27	81.1	30.11	158.7	33.52	331.7	71.2	9350	0.416
AM22	RIM	AM22 RIM	190502	190502_346_LC229	LC229	30	10	3.5	0.1903	0.0096	0.02713	0.00035	0.15066	0.0508	0.0028	176.4	8.2	172.5	2.2	230	110	0.43	153000	55.8	<64	3.11	0.084	<4	226.7	469200	0.474	1.01	<0.062	<0.0033	14.49	0.0254	0.421	0.76	0.355	4.11	1.221	15.83	6.36	36.17	8.74	97.7	24.08	11620	0.107
AM22	CORE	AM22 CORE	190502	190502_347_LC230	LC230	30	10	3.5
AM22	RIM	AM22 RIM	190502	190502_348_LC231	LC231	30	10	3.5	0.212	0.011	0.03001	0.00074	0.28899	0.0518	0.0031	194.6	9.3	190.6	4.6	250	130	0.98	153000	127	<72	3.49	0.091	<4.7	629	503000	1.36	1.08	<0.065	0.0123	18.78	0.0318	0.54	1.65	0.565	9.15	3.24	44.8	18.7	105.7	23.6	244	54.9	11770	0.345
AM22	CORE	AM22 CORE	190502	190502_349_LC232	LC232	30	10	3.5	0.169	0.014	0.02528	0.00046	0.0082449	0.0491	0.0041	158	12	161	2.9	130	170	36	153000	277	<97	5.69	0.227	<6.2	1037	453400	1.47	1.22	0.28	0.0071	36.2	0.09	1.74	4.73	1.32	24.1	7.01	84.9	31	159	33	325	68.6	10690	0.476
AM22	RIM	AM22 RIM	190502	190502_351_LC233	LC233	30	10	3.5	0.213	0.01	0.02665	0.00037	0.13121	0.0586	0.003	195.7	8.7	169.6	2.3	500	110	0.41	153000	85.3	<63	4.45	0.435	9.2	353.1	471800	0.629	2.31	<0.048	0.0179	20.21	0.0389	0.59	1.5	0.553	7.3	2.161	26.57	10.19	54.7	12.16	127.7	29.69	11160	0.171
AM22	CORE	AM22 CORE	190502	190502_352_LC234	LC234	30	10	3.5	0.193	0.028	0.0261	0.00075	0.098271	0.0544	0.0079	178	23	166.1	4.7	260	280	1.87	153000	94	<83	6.3	0.172	<5.7	320.1	456600	0.559	1.05	<0.024	0.073	12.57	0.0241	0.47	1.17	0.371	6.66	2.16	26.54	9.79	50.4	10.72	108.9	23.35	11270	0.189
AM22	RIM	AM22 RIM	190502	190502_353_LC235	LC235	30	10	3.5	0.1691	0.0099	0.0259	0.0006	0.53831	0.0477	0.0025	158.4	8.6	164.9	3.8	80	110	40	153000	130.3	<72	6.78	0.201	<4.8	910	480000	1.67	1.11	0.29	0.013	52.4	0.079	1.92	4.8	2.06	24.9	6.89	81	26.93	130.6	26.77	272	56.4	9860	0.468
AM22	CORE	AM22 CORE	190502	190502_354_LC236	LC236	30	10	3.5	0.2001	0.0084	0.02697	0.00067	0.27036	0.0544	0.0023	185	7.1	171.6	4.2	368	97	870	153000	315	<65	21.4	0.936	48	1970	480000	2.24	1.08	10	0.314	45.5	0.487	7.6	13.2	3.16	61.8	16.7	187	62	292	56.5	521	100.9	10030	0.642
AM22	RIM	AM22 RIM	190502	190502_356_LC237	LC237	30	10	3.5	0.182	0.016	0.02507	0.00056	0.20719	0.053	0.0045	169	14	159.6	3.5	310	180	47.4	153000	53.5	<110	3.48	0.453	20.7	190.9	448000	0.387	1.36	0.3	0.034	11.94	0.04	0.55	0.72	0.42	3.72	1.1	13.48	5.35	29.3	6.86	75.3	18.57	10940	0.103
AM22	CORE	AM22 CORE	190502	190502_357_LC238	LC238	30	10	3.5	0.1834	0.0097	0.02708	0.0005	0.067558	0.0489	0.0024	170.7	8.3	172.2	3.1	160	120	67	153000	87	<61	5.3	0.47	<4.3	329	494500	0.78	1.06	0.9	0.042	17.9	0.037	0.66	1.45	0.373	7.5	2.15	27.2	10.1	52.5	11	116	25.4	14090	0.243
AM22	RIM	AM22 RIM	190502	190502_358_LC239	LC239	30	10	3.5	0.1867	0.0075	0.02676	0.0004	0.11826	0.0511	0.0022	173.5	6.4	170.2	2.5	222	91	103	153000	80.4	<64	3.95	0.165	7.3	515.4	475300	0.74	1.45	0.56	0.013	20.56	0.076	1.27	2.24	0.87	10.81	3.14	38	14.55	78.5	17.52	188.2	43.66	11160	0.226
AM22	CORE	AM22 CORE	190502	190502_359_LC240	LC240	30	10	3.5
AM22	RIM	AM22 RIM	190502	190502_366_LC241	LC241	30	10	3.5	0.179	0.019	0.02702	0.00071	0.10186	0.0485	0.0052	166	16	171.8	4.5	80	210	2.14	153000	580	150	6.57	0.237	<5.6	275.1	455200	0.564	0.92	<0.027	0.69	16.4	0.22	1.11	1.02	0.366	5.95	1.78	22.18	8.32	43	9.48	93.6	20.35	11140	0.192
AM22	CORE	AM22 CORE	190502	190502_367_LC242	LC242	30	10	3.5	0.191	0.017	0.02683	0.00051	0.24095	0.0519	0.0045	176	14	170.7	3.2	210	170	6.98	153000	81.6	<63	6.36	0.254	<4.3	106.2	475300	0.504	0.95	<0.032	<0.004	15.23	0.021	0.32	0.65	0.259	2.42	0.744	7.94	3.055	16.28	3.75	42.37	9.91	13490	0.208
AM22	RIM	AM22 RIM	190502	190502_368_LC243	LC243	30	10	3.5
AM22	CORE	AM22 CORE	190502	190502_369_LC244	LC244	30	10	3.5	0.194	0.017	0.02765	0.00059	0.12331	0.0513	0.0044	178	14	175.8	3.7	180	170	1.4	153000	162	<60	11.8	0.607	<4.6	666	474100	0.504	1.04	<0.01	0.0061	13.64	0.091	1.79	4.25	1.29	19.9	5.43	62.1	20.64	98.1	19.15	180.2	37	10460	0.185
AM22	RIM	AM22 RIM	190502	190502_371_LC245	LC245	30	10	3.5
AM22	CORE	AM22 CORE	190502	190502_372_LC246	LC246	30	10	3.5	0.231	0.02	0.02742	0.00052	0.01987	0.063	0.0059	212	18	174.4	3.3	570	190	2.98	153000	158.6	<60	12.07	0.59	<4.4	350.6	477300	0.615	4.15	0.11	<0.0035	12.64	0.0375	0.68	1.37	0.458	7.94	2.377	29.58	10.56	54.2	11.33	114.8	24.41	10640	0.208
AM22	RIM	AM22 RIM	190502	190502_373_LC247	LC247	30	10	3.5	0.185	0.011	0.02724	0.00035	0.074111	0.0496	0.003	171.6	9.7	173.3	2.2	150	130	1.56	153000	102.6	<57	5.13	0.195	<4.2	265.6	477700	0.64	0.93	<0.04	<0.0016	14.59	0.0169	0.367	0.94	0.332	5.27	1.665	20.79	8.05	42.9	9.42	98.9	21.79	11690	0.206
AM22	CORE	AM22 CORE	190502	190502_374_LC248	LC248	30	10	3.5	0.185	0.016	0.02644	0.00063	0.13094	0.0512	0.0044	171	14	168.2	3.9	200	180	3.69	153000	270	90	6.71	0.339	<5	744	460700	0.556	1.02	<0.085	0.279	15.71	0.199	2.54	5.19	1.51	21.75	5.8	66.7	22.5	109.2	22.31	211.6	43.7	10360	0.195
AM22	RIM	AM22 RIM	190502	190502_376_LC249	LC249	30	10	3.5	0.206	0.011	0.0265	0.00038	0.22639	0.0567	0.003	189.5	9.6	168.6	2.4	430	120	234	153000	114.2	<57	8.6	0.296	<4.3	487.2	470900	1.094	2.57	1	0.138	26.09	0.074	0.85	1.92	0.634	10.29	3.04	37.96	14.1	75.9	16.28	164.5	35.9	11410	0.295
AM22	CORE	AM22 CORE	190502	190502_377_LC250	LC250	30	10	3.5	0.182	0.01	0.02666	0.00051	0.2535	0.0501	0.0028	169.7	8.7	169.6	3.2	190	120	<0.29	153000	179.3	<54	16.37	0.631	<4.1	1007	480600	0.615	0.94	<0.041	0.0609	17.78	0.486	7.04	9.27	2.03	31.17	8.02	89.9	30.62	151	29.46	277.4	56.9	9810	0.275
AM22	RIM	AM22 RIM	190502	190502_378_LC251	LC251	30	10	3.5	0.179	0.01	0.0268	0.00043	0.058915	0.0489	0.003	166.3	9	170.5	2.7	110	130	<0.3	153000	100	<55	5.19	0.195	<4.3	309.9	472600	0.626	0.988	<0.047	<0.0024	16.3	0.0214	0.5	1.31	0.401	6.46	1.925	24.41	9.16	48.7	10.68	112.6	25.01	12050	0.217
AM22	CORE	AM22 CORE	190502	190502_379_LC252	LC252	30	10	3.5	0.405	0.032	0.02902	0.00075	0.52679	0.0992	0.0059	342	22	184.4	4.7	1550	110	570	153000	138.3	51	14.33	1.206	<4	566	472100	0.431	2.23	0.196	0.0171	12.51	0.125	2.09	3.95	1.04	16.8	4.49	51.5	17.5	84	16.6	157	31.8	10350	0.155
AM22	RIM	AM22 RIM	190502	190502_381_LC253	LC253	30	10	3.5	0.189	0.015	0.02724	0.00052	0.19179	0.0506	0.0038	175	12	173.2	3.2	170	150	<0.32	153000	118.3	<60	6.48	0.252	<4.1	434	472700	0.678	0.93	<0.041	0.0032	13.19	0.0461	0.89	1.87	0.56	10.24	2.99	35.7	13.05	66.4	14.23	143.1	30.79	11770	0.242
AM22	CORE	AM22 CORE	190502	190502_382_LC254	LC254	30	10	3.5	0.207	0.044	0.0268	0.002	0.37521	0.056	0.01	189	36	171	12	360	380	3	153000	166	<85	16.6	0.86	73	749	527000	0.551	1.06	<0.085	0.0176	19.4	0.311	5.42	7.8	2.06	29.4	7.05	76	23.7	109.3	21.9	206	37.6	10470	0.186
AM22	RIM	AM22 RIM	190502	190502_383_LC255	LC255	30	10	3.5	0.174	0.02	0.02716	0.00066	0.094043	0.047	0.0053	161	17	172.7	4.2	-10	210	4.92	153000	77.3	<64	7.59	0.26	<4.3	130.8	474900	0.359	1.06	<0.064	<0.0032	6.64	0.0135	0.219	0.59	0.192	2.86	0.878	10.61	3.89	20.7	4.38	45.6	10.53	13270	0.11
AM22	CORE	AM22 CORE	190502	190502_384_LC256	LC256	30	10	3.5	0.173	0.02	0.02679	0.00068	0.17762	0.047	0.0053	160	17	170.4	4.3	-20	210	4.18	153000	148.6	<65	11.33	0.227	<4.1	351.4	477000	0.578	1	<0.06	<0.004	9.26	0.0387	0.7	1.51	0.493	8.28	2.358	29	10.45	53.6	10.98	110	23.94	10150	0.183
AM22	RIM	AM22 RIM	190502	190502_386_LC257	LC257	30	10	3.5
AM22	CORE	AM22 CORE	190502	190502_387_LC258	LC258	30	10	3.5	0.1744	0.0075	0.02616	0.00046	0.10351	0.0488	0.0023	162.9	6.5	166.5	2.9	121	98	7.7	153000	99.8	<59	4.07	0.164	<4.1	677	476700	0.884	0.95	0.066	0.01	27.6	0.121	1.84	3.26	1.251	15.38	4.41	52.8	19.37	103.9	22.9	236.6	53.1	10910	0.224
AM22	RIM	AM22 RIM	190502	190502_388_LC259	LC259	30	10	3.5	0.172	0.011	0.0253	0.00043	0.12087	0.0496	0.0032	160.2	9.5	161.1	2.7	140	130	2.73	153000	59.3	<79	3.63	0.425	6	244.9	463100	0.429	1.46	0.067	0.068	14.44	0.037	0.51	0.94	0.446	4.76	1.247	16.61	6.75	37.8	9.1	102	26.05	10710	0.103
AM22	CORE	AM22 CORE	190502	190502_389_LC260	LC260	30	10	3.5	0.185	0.015	0.02597	0.00058	0.33049	0.0519	0.0038	172	13	165.2	3.7	240	160	0.96	153000	124.8	<84	6.41	0.342	<4.8	755	462600	0.591	1.04	<0.054	0.0125	17.9	0.139	3.13	4.82	1.43	20.82	5.76	66.7	23	113.6	22.61	220.3	45.2	10580	0.183
AM22	RIM	AM22 RIM	190502	190502_396_LC261	LC261	30	10	3.5	0.1738	0.0085	0.02424	0.00034	0.072455	0.0518	0.0024	162.4	7.2	154.4	2.1	260	100	220	153000	76	580	3.81	1.9	65	155.5	461000	0.357	2.5	0.44	0.237	11.41	0.083	0.52	0.62	0.268	2.83	0.757	10.3	4.07	24.3	5.74	70	20.31	12350	0.059
AM22	CORE	AM22 CORE	190502	190502_397_LC262	LC262	30	10	3.5	0.182	0.012	0.02731	0.00071	0.054632	0.0487	0.0035	169	10	173.7	4.5	110	140	1.44	153000	118.3	<66	8.52	0.304	<4.6	281.1	494000	0.666	1.13	<0.071	<0.0042	14.39	0.0244	0.43	1.02	0.306	5.82	1.775	22.95	8.29	42.9	9.27	96.5	20.73	11660	0.244
AM22	RIM	AM22 RIM	190502	190502_398_LC263	LC263	30	10	3.5	0.168	0.0071	0.02556	0.00049	0.25804	0.0474	0.0017	157.5	6.1	162.7	3.1	66	78	1.39	153000	80.5	<62	4.15	0.105	<4.4	396	482000	0.737	1.01	0.047	0.04	22.77	0.0433	0.67	1.45	0.515	7.39	2.161	27.17	10.51	60.6	14.23	156.8	37.6	11730	0.195
AM22	CORE	AM22 CORE	190502	190502_399_LC264	LC264	30	10	3.5	0.165	0.017	0.0265	0.0009	0.36395	0.0453	0.0045	154	15	168.6	5.7	-40	200	1.2	153000	164	<65	8.49	0.264	<4.6	407	509000	0.917	0.93	<0.043	0.0119	16.33	0.0315	0.47	1.59	0.505	9.07	2.67	33.9	12.23	63.3	13.83	144.4	29.9	11490	0.291
AM22	RIM	AM22 RIM	190502	190502_401_LC265	LC265	30	10	3.5	0.164	0.015	0.02619	0.00078	0.065591	0.0458	0.0044	153	13	166.7	4.9	-20	190	0.62	153000	90	<86	3.91	0.155	<6.3	435	463900	0.93	0.91	<0.061	<0.005	17.68	0.0349	0.5	1.37	0.506	7.88	2.62	32.9	12.53	68.8	15.06	156.4	35.2	12170	0.342
AM22	CORE	AM22 CORE	190502	190502_402_LC266	LC266	30	10	3.5	0.189	0.012	0.02704	0.00054	0.0053411	0.051	0.0035	175	9.9	172	3.4	190	130	16.7	153000	70.4	<64	4.41	0.37	14.9	510	470000	0.421	1.42	0.26	0.03	13.5	0.121	1.96	2.93	1.24	13.3	3.51	41.9	15.1	77	16.8	176	39.5	10610	0.124
AM22	RIM	AM22 RIM	190502	190502_403_LC267	LC267	30	10	3.5
BS1	CORE	BS1 CORE	190502	190502_404_LC268	LC268	30	10	3.5	0.19	0.02	0.02759	0.00064	0.10247	0.0503	0.0053	175	17	175.4	4	140	210	4.05	153000	181.8	<67	12.5	0.449	<4.5	665	472400	0.469	0.93	<0.064	0.0115	13.91	0.222	3.5	5.76	1.67	22.4	5.76	63.3	20.2	94.6	18.4	177.1	36.2	10040	0.184
BS1	RIM	BS1 RIM	190502	190502_406_LC269	LC269	30	10	3.5	0.178	0.018	0.02695	0.00047	0.15634	0.0479	0.0048	165	16	171.4	2.9	40	190	6.94	153000	152.8	<60	11.36	0.287	<4.7	267.4	474600	0.558	0.94	<0.056	<0.0017	10.92	0.022	0.526	1.16	0.372	6.1	1.825	22.3	8.16	42.1	8.88	87.6	18.92	10540	0.184
BS1	CORE	BS1 CORE	190502	190502_407_LC270	LC270	30	10	3.5	0.173	0.016	0.02715	0.00054	0.091888	0.0466	0.0045	161	14	172.7	3.4	0	190	9.57	153000	200.6	<63	16.16	0.521	<4.5	446	470000	0.655	0.918	<0.012	0.0069	16.08	0.106	1.75	3.34	1.073	14.28	3.78	41	13.43	63	12.37	118.1	24	9740	0.227
BS1	RIM	BS1 RIM	190502	190502_408_LC271	LC271	30	10	3.5	0.183	0.019	0.02693	0.00062	0.016365	0.0499	0.0053	169	16	171.3	3.9	100	210	5.03	153000	179.3	<60	13.31	0.575	<4	361.9	474700	0.706	0.91	<0.01	0.0037	15.24	0.0442	0.89	2	0.667	9.58	2.735	31.53	10.71	52.3	10.45	101.2	20.92	10530	0.219
BS1	CORE	BS1 CORE	190502	190502_409_LC272	LC272	30	10	3.5	0.188	0.021	0.02694	0.0006	0.091549	0.0523	0.0061	173	17	171.4	3.8	160	220	7.44	153000	167.9	<63	13.21	0.314	<4.5	333.5	473000	0.508	0.93	<0.033	<0.0035	10.25	0.0377	0.69	1.66	0.508	8.34	2.367	28.23	10.07	51.1	10.69	107	23	10110	0.192
BS1	RIM	BS1 RIM	190502	190502_411_LC273	LC273	30	10	3.5	0.186	0.016	0.02704	0.00057	0.15028	0.0501	0.0042	172	13	172	3.6	140	170	1.35	153000	154.9	<53	11.72	0.475	<4.2	694	466000	0.481	0.835	<0.01	0.0127	14.54	0.177	3.03	5.64	1.517	22.2	5.82	64.9	21.18	99.4	19.55	181.7	37.4	10070	0.183
BS1	CORE	BS1 CORE	190502	190502_412_LC274	LC274	30	10	3.5	0.1949	0.0094	0.02727	0.0004	0.0063299	0.0517	0.0025	180.2	8	173.4	2.5	250	110	2.96	153000	143	<51	8	0.242	<4	349	475500	0.735	0.93	<0.0084	<0.0033	12.21	0.046	0.72	1.47	0.366	6.5	2.04	27.7	10.4	55.8	12.22	127.2	27.6	13970	0.445
BS1	RIM	BS1 RIM	190502	190502_413_LC275	LC275	30	10	3.5	0.198	0.011	0.028	0.00041	0.081088	0.0516	0.0029	183.1	9.4	178	2.6	230	120	0.93	153000	145.4	<58	9.79	0.28	<4.4	384	466100	0.624	0.911	<0.032	<0.0036	11.16	0.0322	0.62	1.54	0.38	7.61	2.49	30.8	11.49	59.8	12.6	125.9	27.05	11700	0.281
BS1	CORE	BS1 CORE	190502	190502_414_LC276	LC276	30	10	3.5	0.194	0.019	0.02763	0.00077	0.27509	0.0512	0.005	179	16	175.7	4.8	160	190	9.9	153000	165	<60	11.72	0.265	<3.9	287	475100	0.486	0.98	<0.011	<0.0027	10	0.0356	0.48	1.3	0.377	6.54	1.97	24.2	8.48	43.5	9.33	93.9	20.43	10700	0.168
BS1	RIM	BS1 RIM	190502	190502_416_LC277	LC277	30	10	3.5	0.207	0.019	0.0276	0.00065	0.074089	0.0548	0.005	190	16	175.5	4.1	330	200	1.25	153000	165.9	<65	10.05	0.282	<4.1	445.2	473600	0.756	0.9	<0.013	<0.0039	13.89	0.0389	0.9	1.93	0.632	10.37	3.134	36.61	13.28	67.5	13.97	138.2	29.12	10860	0.298
BS1	CORE	BS1 CORE	190502	190502_417_LC278	LC278	30	10	3.5	0.191	0.016	0.02757	0.00056	0.1602	0.05	0.0043	176	14	175.3	3.5	160	180	6.8	153000	182.3	<65	14.55	0.435	<4.2	559	470900	0.514	0.93	<0.049	0.0075	12.84	0.151	2.18	4.23	1.076	16.72	4.39	51.1	16.9	81.3	16.22	155.5	32.2	9680	0.194
BS1	RIM	BS1 RIM	190502	190502_418_LC279	LC279	30	10	3.5	0.188	0.014	0.02749	0.00062	0.36436	0.0506	0.0038	174	12	174.8	3.9	170	150	3.89	153000	179	<59	12.3	0.394	<4.8	358.2	467600	0.729	0.89	<0.043	<0.0031	14.77	0.0322	0.66	1.85	0.583	9.42	2.688	31.1	10.78	53.68	11	108.4	22.7	10310	0.208
BS1	CORE	BS1 CORE	190502	190502_419_LC280	LC280	30	10	3.5	0.19	0.02	0.0273	0.00063	0.028285	0.0509	0.0056	174	17	173.6	4	130	210	9	153000	160.2	<61	12.25	0.447	<4.1	309.9	468700	0.588	0.94	<0.042	0.0036	12.35	0.0424	0.506	1.43	0.537	7.39	2.142	26.61	9.35	47.3	9.78	98.1	20.65	10310	0.203
BS1	RIM	BS1 RIM	190502	190502_426_LC281	LC281	30	10	3.5	0.192	0.019	0.02733	0.0006	0.020182	0.0514	0.0053	177	16	173.8	3.7	160	200	4.34	153000	154.1	<63	12.46	0.46	<4.1	316	467200	0.578	0.89	<0.034	<0.004	12.29	0.0385	0.71	1.55	0.565	7.45	2.28	27.1	9.43	47.6	9.63	96.1	20.38	10410	0.21
BS1	CORE	BS1 CORE	190502	190502_427_LC282	LC282	30	10	3.5
BS1	RIM	BS1 RIM	190502	190502_428_LC283	LC283	30	10	3.5
BS1	CORE	BS1 CORE	190502	190502_429_LC284	LC284	30	10	3.5	0.195	0.028	0.02596	0.00089	0.18376	0.055	0.0081	179	24	165.2	5.6	280	290	5.29	153000	197	<97	12.3	0.414	<6.2	403.8	457100	0.636	0.94	<0.085	<0.0038	14.74	0.053	1.05	2.24	0.639	11.11	3.1	35.91	12.22	59.8	11.97	115.9	24.63	9730	0.224
BS1	RIM	BS1 RIM	190502	190502_431_LC285	LC285	30	10	3.5
BS1	CORE	BS1 CORE	190502	190502_432_LC286	LC286	30	10	3.5	0.198	0.017	0.02648	0.00067	0.15919	0.0537	0.0045	182	14	168.4	4.2	310	180	2.55	153000	158.9	<65	14.63	0.448	<3.9	551	473000	0.476	0.87	<0.011	0.0091	13.55	0.083	1.81	3.77	1.138	17.06	4.46	51.1	16.57	79.1	15.64	147.2	29.93	9990	0.166
BS1	RIM	BS1 RIM	190502	190502_433_LC287	LC287	30	10	3.5	0.196	0.019	0.0265	0.00065	0.036906	0.0545	0.0056	180	16	168.6	4.1	280	200	2.77	153000	166.4	<58	11.12	0.307	<4.8	358.1	473100	0.571	0.92	0.227	<0.0038	11.52	0.0434	0.84	1.7	0.509	9.44	2.67	31.33	10.7	54.9	11.37	112	23.48	10550	0.223
BS1	CORE	BS1 CORE	190502	190502_434_LC288	LC288	30	10	3.5	0.174	0.023	0.0275	0.00097	0.09732	0.0464	0.0064	162	20	174.9	6.1	-10	270	9.97	153000	136	<65	13.8	0.38	8.9	226	486900	0.478	0.97	<0.076	<0.0028	10.6	0.0227	0.47	1.04	0.326	4.82	1.44	18.5	6.59	34.9	7.23	75.3	16.08	10640	0.15
BS1	RIM	BS1 RIM	190502	190502_436_LC289	LC289	30	10	3.5
BS1	CORE	BS1 CORE	190502	190502_437_LC290	LC290	30	10	3.5	0.214	0.03	0.0281	0.0014	0.07646	0.0562	0.0087	196	25	178.6	9	370	320	18.2	153000	142	<78	14.9	0.358	<4.9	217	514000	0.54	0.98	<0.076	0.0063	11.19	0.024	0.51	1.03	0.318	5.25	1.481	18.9	6.55	33.7	6.99	70	15.38	10800	0.161
BS1	RIM	BS1 RIM	190502	190502_438_LC291	LC291	30	10	3.5	0.193	0.03	0.02707	0.00086	0.055747	0.0519	0.008	176	26	172.2	5.4	150	310	14.1	153000	136.3	<80	12.2	0.276	7.5	192.2	458200	0.442	0.83	<0.019	0.0046	9.69	0.0215	0.38	0.78	0.248	4.33	1.347	16.49	5.94	29.54	6.27	62.5	13.59	10100	0.141
BS1	CORE	BS1 CORE	190502	190502_439_LC292	LC292	30	10	3.5	0.2	0.017	0.02672	0.00054	0.18874	0.0542	0.0044	184	14	170	3.4	290	170	5.91	153000	205.5	<66	13.38	0.331	<4.2	590	474600	0.513	0.826	<0.044	0.0086	11.31	0.126	2.32	4.05	1.2	17.1	4.49	52.5	17.7	86.1	17.08	164.1	34.2	9740	0.19
BS1	RIM	BS1 RIM	190502	190502_441_LC293	LC293	30	10	3.5	0.173	0.017	0.0269	0.00065	0.13027	0.0459	0.0045	160	15	171.1	4.1	0	200	2.41	153000	154.2	<68	12.66	0.423	<4	336.6	467000	0.581	0.97	<0.044	<0.0045	13.66	0.0348	0.67	1.55	0.462	8.28	2.39	28.82	10.14	51	10.51	103.6	22.01	10050	0.194
BS1	CORE	BS1 CORE	190502	190502_442_LC294	LC294	30	10	3.5	0.743	0.053	0.0327	0.00075	0.20554	0.165	0.012	561	31	207.4	4.6	2470	120	2.6	153000	175.6	<64	16.9	0.74	75	459	479900	0.698	0.91	5.5	0.067	12.35	0.117	1.72	2.7	0.7	11.3	3.24	39.6	13.9	68.3	13.7	137	28.9	10700	0.261
BS1	RIM	BS1 RIM	190502	190502_443_LC295	LC295	30	10	3.5	0.1812	0.0041	0.02659	0.00039	0.15488	0.0491	0.0014	169	3.6	169.1	2.5	145	63	10	153000	130	<77	5.7	0.249	13.1	363.5	475500	1.179	1.01	0.055	0.0124	16.64	0.0231	0.28	1.08	0.255	6.07	2.016	26.26	10.43	57.83	13.26	142.1	32.25	15190	0.679
BS1	CORE	BS1 CORE	190502	190502_444_LC296	LC296	30	10	3.5	0.206	0.021	0.02825	0.0008	0.025757	0.0531	0.006	189	18	179.5	5	270	230	4.7	153000	152.9	<82	14.8	2.03	50	697	508000	0.516	0.95	<0.082	0.0403	17.15	0.126	2.28	4.24	1.33	21	5.82	63.9	20.9	101.4	19.64	187.4	38.5	10920	0.185
BS1	RIM	BS1 RIM	190502	190502_446_LC297	LC297	30	10	3.5	0.178	0.017	0.02687	0.00059	0.12606	0.0479	0.0045	165	14	170.9	3.7	50	180	3.53	153000	153.6	<70	10.99	0.379	<4.5	294.7	469000	0.631	0.89	<0.054	0.003	13.96	0.032	0.59	1.29	0.355	6.91	2.1	25.34	8.86	46.37	9.48	95.3	20.3	10870	0.2
BS1	CORE	BS1 CORE	190502	190502_447_LC298	LC298	30	10	3.5	0.191	0.02	0.02657	0.00062	0.081814	0.0517	0.0057	176	18	169	3.9	200	230	0.78	153000	168	<81	12.7	0.492	<5.4	679	453700	0.523	0.8	<0.052	0.0237	15.12	0.238	3.98	5.83	1.57	21.9	5.69	63.5	21.2	100.3	19.4	181	38	9420	0.212
BS1	RIM	BS1 RIM	190502	190502_448_LC299	LC299	30	10	3.5
BS1	CORE	BS1 CORE	190502	190502_449_LC300	LC300	30	10	3.5	0.16	0.015	0.02674	0.00061	0.19818	0.0434	0.0042	149	13	170.1	3.8	-130	180	4.24	153000	222.4	<76	14.5	0.368	<4.7	465.4	469500	0.638	0.89	<0.052	0.0029	11.73	0.081	1.38	2.86	0.765	12.24	3.28	39.2	13.68	70	14.83	153.5	33.5	9410	0.232
BS1	RIM	BS1 RIM	190502	190502_456_LC301	LC301	30	10	3.5	0.181	0.018	0.02769	0.00087	0.43602	0.0461	0.0039	168	16	176.1	5.4	30	180	3.26	153000	177.3	<72	11.97	0.317	<4.9	350.2	463900	0.644	0.85	<0.054	0.048	13.62	0.051	0.85	1.64	0.488	9.16	2.6	30.7	10.56	53.3	11	109.2	23.08	10320	0.208
BS1	CORE	BS1 CORE	190502	190502_457_LC302	LC302	30	10	3.5	0.184	0.022	0.02511	0.00092	0.14329	0.0531	0.0064	170	19	159.9	5.8	260	240	41.1	153000	189	<99	12	1.14	68	506	459500	2.8	0.89	0.31	0.113	13.95	0.056	0.96	1.72	0.54	10.8	3.25	39.2	14.92	79.3	17.8	191	42.3	10500	2.9
BS1	RIM	BS1 RIM	190502	190502_458_LC303	LC303	30	10	3.5
BS1	CORE	BS1 CORE	190502	190502_459_LC304	LC304	30	10	3.5	0.186	0.019	0.02685	0.00058	0.032593	0.0502	0.0053	171	17	170.8	3.6	120	210	13.07	153000	245.6	<66	13.74	0.304	<4.8	471.5	473700	0.576	0.81	<0.059	0.0045	12.81	0.0706	1.32	2.58	0.774	12.35	3.48	41.01	14.05	70.1	14.17	140.5	29.82	10090	0.226
BS1	RIM	BS1 RIM	190502	190502_461_LC305	LC305	30	10	3.5	0.174	0.014	0.0268	0.00049	0.13504	0.0469	0.0038	164	13	170.5	3.1	50	170	3.62	153000	180.5	<63	11.07	0.278	<4.2	406	473300	0.739	0.9	<0.035	<0.0026	15.07	0.0504	0.95	2.3	0.565	10.58	3	35.7	12.49	61.7	12.37	122.2	25.67	10480	0.265
BS1	CORE	BS1 CORE	190502	190502_462_LC306	LC306	30	10	3.5	0.189	0.02	0.02656	0.00073	0.0069968	0.0517	0.0059	175	17	169	4.6	190	220	3.37	153000	141.9	<75	14.2	0.395	<4.8	318.6	485000	0.576	0.81	<0.073	<0.0034	12.45	0.033	0.61	1.59	0.454	7.6	2.304	27.26	9.63	48.5	9.99	99.2	20.73	10490	0.205
BS1	RIM	BS1 RIM	190502	190502_463_LC307	LC307	30	10	3.5	0.184	0.02	0.02749	0.00079	0.13266	0.0488	0.0056	170	17	174.8	4.9	80	220	0.66	153000	146.9	<88	10.33	0.406	<5.4	431.1	460500	0.591	0.8	<0.061	<0.0035	12.72	0.0393	0.77	2.13	0.497	10.21	3.03	36.4	12.92	64.6	13.37	132.7	27.07	10180	0.207
BS1	CORE	BS1 CORE	190502	190502_464_LC308	LC308	30	10	3.5	0.282	0.057	0.0272	0.0014	0.61176	0.075	0.013	250	45	172.9	8.8	980	350	311	153000	171	<160	18.8	0.58	26.2	306.2	440000	0.53	0.8	0.72	0.12	10.85	0.064	0.97	1.71	0.46	7.52	2.34	26.8	9.36	47.3	9.75	98	20.37	9500	0.192
BS1	RIM	BS1 RIM	190502	190502_466_LC309	LC309	30	10	3.5	0.227	0.028	0.02667	0.00089	0.076329	0.062	0.0081	206	23	169.7	5.6	540	270	4.12	153000	110.2	<84	8.19	0.206	<5.9	205	451700	0.481	0.8	<0.08	<0.0025	10.15	0.0133	0.28	0.75	0.208	3.96	1.246	16.14	5.95	32.83	7.17	73.7	16.41	10600	0.188
BS1	CORE	BS1 CORE	190502	190502_467_LC310	LC310	30	10	3.5	0.2	0.025	0.02673	0.00087	0.30695	0.0541	0.0065	183	21	170	5.5	270	240	9.1	153000	189.6	<88	13.6	0.64	<6	450	454100	0.418	0.87	<0.1	0.007	11.82	0.105	1.61	3.04	0.9	13.3	3.53	39.9	13.48	67.3	13.79	131	27.9	9720	0.154
BS1	RIM	BS1 RIM	190502	190502_468_LC311	LC311	30	10	3.5	0.194	0.02	0.02673	0.00059	0.22613	0.0523	0.0052	178	16	170.1	3.7	200	190	8.06	153000	140.2	<78	12.5	0.355	<4.7	240.2	469200	0.487	0.87	<0.073	0.0043	11.48	0.0238	0.43	1.05	0.331	5.5	1.623	20.08	7.13	37.85	8.02	81.6	17.4	10430	0.183
BS1	CORE	BS1 CORE	190502	190502_469_LC312	LC312	30	10	3.5	0.196	0.019	0.02668	0.00068	0.13504	0.0536	0.0054	180	16	169.7	4.3	270	220	64	153000	167.7	<67	13.7	0.552	50	652	463400	0.6	0.87	0.51	0.052	15.22	0.163	3.19	5.67	1.55	22.6	5.59	61.9	19.48	93	17.97	171.2	34	9660	0.194
BS1	RIM	BS1 RIM	190502	190502_471_LC313	LC313	30	10	3.5	0.255	0.031	0.02769	0.00089	0.19772	0.0665	0.0079	230	25	176.1	5.6	750	260	13.2	153000	110	<74	7.23	0.298	15.9	315.8	495100	0.751	0.87	2.97	0.047	15.77	0.046	0.66	1.49	0.442	6.87	1.95	24.4	9.1	47.1	9.78	101.1	21.79	12290	0.276
BS1	CORE	BS1 CORE	190502	190502_472_LC314	LC314	30	10	3.5	0.205	0.025	0.0276	0.0012	0.20369	0.0545	0.0072	188	21	175.3	7.8	320	290	3.25	153000	115.3	<68	12.14	0.297	9.6	414	517000	0.4	1.07	<0.047	0.042	11.25	0.0623	0.83	2.16	0.695	10.5	2.99	35.8	11.96	60.6	12.82	123.9	25.6	11160	0.139
BS1	RIM	BS1 RIM	190502	190502_473_LC315	LC315	30	10	3.5	0.185	0.023	0.02669	0.00083	0.12447	0.0507	0.0067	171	20	169.8	5.2	150	260	1.49	153000	165	<90	9.43	0.341	<5.6	350.3	454500	0.554	0.98	<0.051	<0.0043	12.58	0.0225	0.63	1.09	0.364	7.94	2.122	28.9	10.66	56.1	11.81	113.9	23.97	10110	0.185
BS1	CORE	BS1 CORE	190502	190502_474_LC316	LC316	30	10	3.5	0.176	0.017	0.02692	0.00054	0.059907	0.0473	0.0048	166	16	171.2	3.4	30	200	1.8	153000	170.8	<69	11.69	0.235	<4.3	404.6	475300	0.539	0.85	<0.045	<0.0032	10.84	0.0369	0.82	1.92	0.6	9.13	2.76	33.45	11.89	61.41	12.86	130.9	28.91	9910	0.213
BS1	RIM	BS1 RIM	190502	190502_476_LC317	LC317	30	10	3.5	0.294	0.02	0.02781	0.00061	0.11814	0.0771	0.0057	260	16	176.8	3.8	1020	160	4.61	153000	206.8	<69	10.03	0.263	<4.4	444.7	470900	0.578	0.88	1.27	0.011	11.14	0.0433	0.82	2.05	0.673	10.61	3.057	36.77	13.07	68	14.17	142.8	30.91	10130	0.255
BS1	CORE	BS1 CORE	190502	190502_477_LC318	LC318	30	10	3.5	0.168	0.017	0.02708	0.00045	0.25822	0.0448	0.0046	156	15	172.2	2.8	-90	190	1.15	153000	168.6	<64	15.35	0.461	<4.8	539	478200	0.547	0.91	<0.034	0.0062	15.64	0.105	2.03	3.74	0.989	16.4	4.21	49.1	16.1	78.4	15.54	150.3	31.2	10100	0.199
BS1	RIM	BS1 RIM	190502	190502_478_LC319	LC319	30	10	3.5	0.221	0.033	0.02748	0.0009	0.83593	0.0587	0.0092	201	27	174.8	5.6	520	360	5.7	153000	113.5	<64	10.35	0.313	<4.6	250.9	515000	0.63	1.08	0.35	<0.0043	13.13	0.0269	0.38	0.96	0.269	5.21	1.68	21.3	7.49	40.6	8.78	89.8	19.29	12690	0.215
BS1	CORE	BS1 CORE	190502	190502_479_LC320	LC320	30	10	3.5	0.179	0.016	0.02709	0.00074	0.19262	0.0478	0.0042	167	14	172.3	4.6	70	180	1.66	153000	145	<67	15.3	0.368	<4.4	668	499600	0.479	0.84	<0.055	0.0146	12.79	0.193	3.64	5.62	1.42	20.9	5.59	62	20.5	97.8	18.8	178	36.4	10520	0.156
BS1	RIM	BS1 RIM	190502	190502_486_LC321	LC321	30	10	3.5
BS1	CORE	BS1 CORE	190502	190502_487_LC322	LC322	30	10	3.5	0.173	0.016	0.02663	0.00065	0.015825	0.0472	0.0045	161	14	169.4	4.1	70	200	3.7	153000	192.9	<68	14.1	0.369	<4.5	406.2	466400	0.556	0.89	<0.038	0.0081	12.69	0.0604	0.99	2.28	0.653	10.55	2.874	35.28	12.07	59.8	12.56	124	26.5	9480	0.185
BS1	RIM	BS1 RIM	190502	190502_488_LC323	LC323	30	10	3.5	0.181	0.016	0.02645	0.00066	0.17211	0.0513	0.0053	168	13	168.3	4.1	190	210	4.83	153000	161	<79	9.68	0.259	<5	252.3	462800	0.625	0.81	<0.053	0.022	12.89	0.0275	0.51	0.93	0.304	5.62	1.628	20.39	7.45	39.5	8.27	88.2	18.94	10650	0.233
BS1	CORE	BS1 CORE	190502	190502_489_LC324	LC324	30	10	3.5	0.184	0.018	0.02618	0.00081	0.21602	0.0513	0.005	170	15	166.6	5.1	180	200	12.4	153000	210	<69	13.5	0.431	<4.9	349.5	464300	0.675	0.8	<0.065	0.121	16.94	0.072	0.88	1.93	0.62	9.63	2.675	31.74	10.48	52.1	10.48	102.2	20.89	10010	0.236
BS1	RIM	BS1 RIM	190502	190502_491_LC325	LC325	30	10	3.5	0.17	0.014	0.02618	0.00058	0.093853	0.047	0.004	159	12	166.6	3.6	30	170	<0.42	153000	122.3	<78	6.36	0.167	<4.9	367.8	459300	0.875	0.9	<0.048	<0.0044	17.34	0.0237	0.4	1.18	0.381	7.5	2.26	29.88	10.88	57.3	11.93	124	26.43	11820	0.28
BS1	CORE	BS1 CORE	190502	190502_492_LC326	LC326	30	10	3.5	0.187	0.018	0.0262	0.001	0.15258	0.0516	0.0052	174	16	166.4	6.3	240	230	1.67	153000	244	<91	15.3	1.96	6.4	1546	502000	1.11	1.29	<0.078	0.045	25.98	0.431	6.66	10.64	3.19	48.7	12.85	141.8	46.1	221.8	43.4	417	82.7	9930	0.341
BS1	CORE	BS1 CORE	190502	190502_493_LC327	LC327	30	10	3.5	0.194	0.015	0.0261	0.00053	0.2214	0.0534	0.0042	179	13	166.1	3.3	270	160	4.37	153000	156.3	<59	12.4	0.39	<4.1	315.4	479000	0.634	0.89	<0.047	<0.0034	14.32	0.0319	0.72	1.61	0.498	8.11	2.335	27.54	9.5	48.21	10.06	98.7	20.84	10630	0.2
BS1	RIM	BS1 RIM	190502	190502_494_LC328	LC328	30	10	3.5	0.193	0.015	0.02666	0.00047	0.017736	0.0524	0.004	178	13	169.6	2.9	230	160	1.28	153000	154.1	<64	11.23	0.476	<4.1	430	473400	0.64	0.81	<0.041	<0.0037	14.25	0.069	1.46	2.54	0.696	11.43	3.06	37.2	12.61	63.8	12.9	127.9	26.87	10550	0.21
BS1	CORE	BS1 CORE	190502	190502_496_LC329	LC329	30	10	3.5	0.193	0.023	0.02677	0.00075	0.038717	0.0523	0.0064	178	19	170.3	4.7	210	240	4.72	153000	218	<83	13.56	0.292	<5.1	485	466400	0.61	0.8	<0.073	0.0045	12.09	0.091	1.67	2.98	0.807	12.37	3.47	41.1	14.1	72.4	14.72	144.5	31.1	9490	0.208
BS1	RIM	BS1 RIM	190502	190502_497_LC330	LC330	30	10	3.5	0.18	0.018	0.0268	0.00051	0.13555	0.0486	0.0048	167	15	170.5	3.2	90	200	0.78	153000	146.4	<70	8.62	0.297	<4.6	387	468100	0.684	0.76	<0.049	0.0127	14.22	0.0373	0.63	1.41	0.414	8.31	2.56	31.3	11.27	60	12.59	126.3	27.43	11180	0.274
BS1	CORE	BS1 CORE	190502	190502_498_LC331	LC331	30	10	3.5	0.18	0.015	0.02636	0.00061	0.029993	0.0486	0.0042	167	13	167.7	3.9	110	180	4.56	153000	156.8	<53	12	0.377	<3.7	311.1	476300	0.627	0.82	<0.052	0.0026	13.74	0.0306	0.7	1.46	0.456	7.42	2.172	26.37	9.27	47.53	9.87	98.3	20.9	10650	0.201
BS1	RIM	BS1 RIM	190502	190502_499_LC332	LC332	30	10	3.5
BS1	CORE	BS1 CORE	190502	190502_501_LC333	LC333	30	10	3.5	0.184	0.019	0.02653	0.00091	0.0024449	0.0503	0.0054	171	16	168.8	5.7	160	220	7.2	153000	153.4	<85	12.1	0.267	<5.6	280.9	463900	0.497	0.73	<0.11	<0.0049	11.35	0.0299	0.57	1.29	0.424	6.99	1.95	24.47	8.46	42.2	8.75	86.9	18.53	10150	0.157
BS1	CORE	BS1 CORE	190502	190502_502_LC334	LC334	30	10	3.5	0.196	0.013	0.02679	0.00044	0.10965	0.053	0.0035	181	11	170.4	2.8	270	140	7.01	153000	173	<60	12.35	0.332	<4.2	539	476100	0.447	0.84	<0.01	0.0034	12.9	0.103	1.86	3.93	1.03	16.3	4.31	49.1	16.29	77.8	15.07	145.6	30.1	10700	0.183
BS1	RIM	BS1 RIM	190502	190502_503_LC335	LC335	30	10	3.5	0.222	0.017	0.02717	0.00047	0.0043483	0.0589	0.0047	202	14	172.8	3	480	170	8.1	153000	168.8	<60	12.49	0.364	15.4	674	470300	0.458	0.83	0.092	0.0087	14.49	0.125	2.66	4.75	1.28	21.57	5.51	62.2	20.3	96	18.36	174.9	35.48	10430	0.168
BS1	CORE	BS1 CORE	190502	190502_504_LC336	LC336	30	10	3.5	0.234	0.029	0.02653	0.00057	0.074648	0.0637	0.0081	212	23	168.8	3.6	620	240	740	153000	188	<76	15.9	1.82	300	928	446900	0.789	0.84	4.03	0.363	14.35	0.288	3.49	4.78	1.32	23.3	6.94	81	28.1	138.7	27.2	258	53.4	9260	0.274
BS1	RIM	BS1 RIM	190502	190502_506_LC337	LC337	30	10	3.5	0.214	0.015	0.02655	0.00067	0.092231	0.0583	0.0041	196	12	168.9	4.2	460	150	11.2	153000	100.6	<53	6.9	0.231	26	296.1	482400	0.774	0.97	0.99	0.0105	13.2	0.0184	0.394	1	0.269	5.41	1.751	22.8	8.6	47.4	10.36	109	23.7	13370	0.331
BS1	CORE	BS1 CORE	190502	190502_507_LC338	LC338	30	10	3.5	0.193	0.03	0.02728	0.00091	0.30313	0.0518	0.009	177	25	173.5	5.7	120	310	3.29	153000	135	<69	13.53	0.334	<5.5	305	494000	0.527	0.82	<0.056	<0.0041	11.29	0.0338	0.54	1.55	0.436	7.52	2.2	25.7	9.29	45.9	9.34	94.5	20.41	10730	0.169
BS1	RIM	BS1 RIM	190502	190502_508_LC339	LC339	30	10	3.5
BS1	CORE	BS1 CORE	190502	190502_509_LC340	LC340	30	10	3.5	0.209	0.027	0.02664	0.00089	0.0080004	0.0568	0.0078	190	23	169.5	5.6	350	270	3.78	153000	170	<98	12.73	0.398	<6.1	529	457500	0.452	0.81	<0.087	<0.0039	13.45	0.102	2.28	4.32	1.3	16.3	4.31	48.1	15.92	77.6	15.05	145	30.14	9980	0.193
BS1	RIM	BS1 RIM	190502	190502_516_LC341	LC341	30	10	3.5	0.383	0.037	0.02694	0.00035	0.11477	0.105	0.011	330	29	171.3	2.2	1520	210	120	153000	143.8	<69	9.76	0.84	102	409	478000	0.826	0.93	9.6	0.62	24.32	0.323	2.3	2.69	1.24	10.85	2.88	34.49	11.88	60.6	12.4	126.7	26.47	11770	0.294
BS1	CORE	BS1 CORE	190502	190502_517_LC342	LC342	30	10	3.5	0.72	0.11	0.0324	0.0011	0.60429	0.155	0.02	525	60	205.7	6.8	2150	240	6.11	153000	135	<59	14.4	0.387	<4.8	231	462100	0.445	0.79	0.78	0.0051	10.42	0.0233	0.56	1.05	0.297	5.39	1.62	19.7	6.88	35.7	7.22	74.8	15.66	9910	0.149
BS1	RIM	BS1 RIM	190502	190502_518_LC343	LC343	30	10	3.5	0.171	0.017	0.0267	0.00062	0.05399	0.0461	0.0045	158	15	169.8	3.9	-30	190	3.71	153000	124.2	<64	10.5	0.344	<4.1	317.6	475100	0.476	0.91	<0.01	<0.0027	10.91	0.0269	0.62	1.36	0.429	7.32	2.239	26.61	9.44	48.3	10.09	102.3	21.19	10930	0.161
BS1	CORE	BS1 CORE	190502	190502_519_LC344	LC344	30	10	3.5	3.76	0.57	0.0544	0.0043	0.98476	0.447	0.046	1450	150	341	27	3910	200	2300	153000	180	101	22.6	2.52	2930	544	462100	0.604	0.82	52.8	0.256	14.34	0.166	1.94	2.97	1.113	13.51	3.75	45.6	16.11	80.8	16.38	161.6	33.92	9220	0.202
AM18	CORE	AM18 CORE	190502	190502_521_LC345	LC345	30	10	3.5	0.186	0.01	0.02659	0.00095	0.40204	0.0503	0.0026	173.2	8.7	169.2	6	190	110	1.3	153000	82	<76	4.25	0.143	<4.9	453	475000	0.481	0.81	<0.026	0.32	20.2	0.138	1.64	2.77	0.98	9.9	2.88	32.3	12.62	71.8	17.11	198.2	47.1	10950	0.117
AM18	RIM	AM18 RIM	190502	190502_522_LC346	LC346	30	10	3.5	0.226	0.02	0.02536	0.00073	0.66306	0.0647	0.0054	206	17	161.4	4.6	690	170	2.6	153000	62	74	2.95	2.17	<4.2	256.4	478000	0.452	1.17	0.118	0.31	16.57	0.058	0.56	0.8	0.364	4.22	1.196	15.5	6.67	40.7	10.07	125.3	34.52	11500	0.104
AM18	CORE	AM18 CORE	190502	190502_523_LC347	LC347	30	10	3.5	0.188	0.019	0.02751	0.00089	0.098225	0.0493	0.0053	174	16	174.9	5.6	120	210	<0.49	153000	95	<96	2.2	0.113	<6.3	346	452000	0.357	0.88	<0.062	0.034	11.57	0.079	1.05	2	0.77	7.99	2.11	24.4	9.23	53.2	11.87	133.9	33.4	10550	0.083
AM18	RIM	AM18 RIM	190502	190502_524_LC348	LC348	30	10	3.5	0.2282	0.0098	0.02827	0.00045	0.14209	0.0578	0.0025	208.2	8.1	179.7	2.8	485	96	3.98	153000	52.8	<67	3.14	0.599	9.2	230.8	450000	0.475	1.18	1.37	0.24	18.01	0.089	0.82	0.95	0.419	4.29	1.237	15.24	6.24	36.8	8.52	96.8	25.5	10770	0.081
AM18	CORE	AM18 CORE	190502	190502_526_LC349	LC349	30	10	3.5	0.184	0.015	0.02647	0.00068	0.098679	0.0496	0.0044	171	13	168.4	4.3	140	170	<0.42	153000	82	<87	3.34	0.137	<5.7	509	428000	0.512	0.73	<0.094	0.0054	16.29	0.079	1.17	2.76	0.91	12.9	3.45	41.2	14.6	76.9	16.3	169	34.7	10600	0.163
AM18	RIM	AM18 RIM	190502	190502_527_LC350	LC350	30	10	3.5	0.2025	0.0099	0.02857	0.00074	0.20681	0.051	0.0025	186.8	8.3	181.5	4.6	210	110	1.29	153000	44.4	<59	2.9	0.142	8.3	268	442000	0.484	0.82	0.019	0.0038	17	0.0265	0.44	0.88	0.432	4.46	1.292	17	7	42.1	9.79	119.3	30	10560	0.105
AM18	CORE	AM18 CORE	190502	190502_528_LC351	LC351	30	10	3.5
AM18	RIM	AM18 RIM	190502	190502_529_LC352	LC352	30	10	3.5	0.1951	0.0099	0.02702	0.00064	0.48059	0.0516	0.0023	180.7	8.4	171.9	4	249	97	<0.33	153000	50.2	<59	2.94	0.124	<4.1	297	477000	0.641	0.88	<0.047	0.0071	20.51	0.053	0.88	1.35	0.625	6.03	1.681	21.3	8.21	45.1	10.67	124.2	29.4	11270	0.164
AM18	CORE	AM18 CORE	190502	190502_531_LC353	LC353	30	10	3.5	0.191	0.016	0.02739	0.00083	0.1172	0.0501	0.0044	177	14	174.2	5.2	160	180	0.63	153000	92.6	<84	5.3	0.25	<5.5	328	437000	0.518	0.89	<0.079	0.0032	12.3	0.035	0.71	1.5	0.5	7.8	2.28	28.2	10.2	53.4	11.4	116	25.6	11110	0.207
AM18	RIM	AM18 RIM	190502	190502_532_LC354	LC354	30	10	3.5
AM18	CORE	AM18 CORE	190502	190502_533_LC355	LC355	30	10	3.5	0.1807	0.0093	0.02587	0.00058	0.41945	0.0506	0.0024	168.2	8	164.6	3.6	200	100	1.68	153000	106	<61	3.19	0.122	<4.2	930	463000	1.02	0.83	<0.032	0.0243	47	0.285	5.9	8.9	2.66	32.4	8	88	28.2	137	26.6	264	54.5	10330	0.183
AM18	RIM	AM18 RIM	190502	190502_534_LC356	LC356	30	10	3.5	0.188	0.012	0.02464	0.00058	0.66068	0.055	0.0026	175	10	156.9	3.7	370	100	2.52	153000	60.5	<62	3.05	0.51	9.7	358	453000	0.642	0.92	0.083	0.59	24.8	0.085	0.82	1.29	0.642	7.15	1.87	23.6	9.18	52.8	12	137	35.3	10370	0.106
AM18	CORE	AM18 CORE	190502	190502_536_LC357	LC357	30	10	3.5
AM18	RIM	AM18 RIM	190502	190502_537_LC358	LC358	30	10	3.5	0.172	0.01	0.02453	0.00051	0.35983	0.0501	0.0028	161	8.8	156.2	3.2	180	120	5.4	153000	329	<74	17.1	1.63	14.6	1541	485000	1.62	1.3	0.151	0.083	36.4	0.305	5.01	7.6	2.29	38.5	10.97	133.6	45.7	222	44.3	418	82.9	9310	0.428
AM18	CORE	AM18 CORE	190502	190502_538_LC359	LC359	30	10	3.5	0.173	0.011	0.02683	0.00062	0.2088	0.0462	0.0028	161.8	9.4	170.6	3.9	10	130	<0.36	153000	200	<71	7.29	0.592	<5.2	1130	447000	0.952	0.81	<0.091	0.0144	22.9	0.24	4.01	6.57	1.88	30.3	8.51	99	34.5	170	34.1	333	67.4	10230	0.363
AM18	RIM	AM18 RIM	190502	190502_539_LC360	LC360	30	10	3.5	0.183	0.016	0.02716	0.00088	0.026641	0.0485	0.0044	170	14	172.7	5.5	100	190	<0.45	153000	44.2	<84	3.04	0.075	<5.9	181.1	440000	0.374	0.79	<0.088	<0.0054	11.03	0.0234	0.33	0.79	0.309	3.36	0.998	12.47	4.98	29.1	6.62	78	20.7	10640	0.096
AM18	CORE	AM18 CORE	190502	190502_546_LC361	LC361	30	10	3.5	0.174	0.013	0.02515	0.0007	0.031944	0.0496	0.0038	162	11	160.1	4.4	150	160	0.45	153000	67.8	<75	2.72	0.074	19.5	720	443000	0.477	0.94	<0.09	0.0076	20.9	0.152	2.8	4.99	1.91	20.5	5.28	61.9	20.8	107	21.6	226	50.6	10440	0.138
AM18	RIM	AM18 RIM	190502	190502_547_LC362	LC362	30	10	3.5	0.189	0.014	0.02585	0.00054	0.45879	0.0529	0.0035	175	12	164.5	3.4	280	140	21.6	153000	52.8	<61	25.6	0.87	74	241	463200	0.448	0.98	1.75	0.86	20.4	0.238	1.24	1.1	0.575	5.01	1.44	17.3	6.5	36.8	8.45	92.5	22.92	11240	0.064
AM18	CORE	AM18 CORE	190502	190502_548_LC363	LC363	30	10	3.5	0.202	0.015	0.02681	0.00077	0.097446	0.054	0.0042	186	12	170.6	4.8	330	170	<0.46	153000	64	<78	3.08	0.172	<5.5	455	457000	0.456	0.77	<0.024	0.0085	14.2	0.069	1.51	2.2	0.8	10.5	2.8	34.3	12.3	67.3	14.6	156	35.9	10670	0.115
AM18	RIM	AM18 RIM	190502	190502_549_LC364	LC364	30	10	3.5	0.194	0.0074	0.02721	0.00054	0.48094	0.0502	0.0018	179.9	6.3	173.1	3.4	215	89	68	153000	54.3	<71	3.02	0.71	207	266	476000	0.672	0.88	0.51	0.0109	24.7	0.0412	0.52	1.12	0.435	5.33	1.45	18.5	7.1	40.1	9.41	111.1	26.25	11930	0.171
AM18	CORE	AM18 CORE	190502	190502_551_LC365	LC365	30	10	3.5
AM18	RIM	AM18 RIM	190502	190502_552_LC366	LC366	30	10	3.5	0.1846	0.0099	0.02713	0.00048	0.086655	0.0486	0.0028	171.5	8.4	172.5	3	100	120	0.78	153000	45.4	<50	3.01	0.075	<3.8	165.2	453000	0.312	0.81	<0.041	0.0122	11.48	0.0146	0.284	0.603	0.316	3.14	0.896	11.63	4.44	26.2	6	70.7	18.46	10790	0.074
AM18	CORE	AM18 CORE	190502	190502_553_LC367	LC367	30	10	3.5	0.19	0.019	0.02712	0.00065	0.10389	0.0503	0.0053	176	17	172.5	4.1	170	220	2.5	153000	310	<84	3.14	0.205	<5.3	389	461000	0.312	0.79	<0.089	0.41	12.5	0.134	1.13	2.16	0.87	9.1	2.55	29.5	10.7	56.4	12	128	29.6	11210	0.095
AM18	RIM	AM18 RIM	190502	190502_554_LC368	LC368	30	10	3.5	0.191	0.016	0.02764	0.00081	0.29176	0.0488	0.004	177	14	175.7	5.1	120	170	<0.37	153000	59.5	<65	3.35	0.135	<4.6	204	473000	0.431	0.82	<0.061	0.0103	12.23	0.0179	0.29	0.82	0.314	4.12	1.21	15.4	5.87	33.4	7.59	87.1	20.75	11160	0.131
AM18	CORE	AM18 CORE	190502	190502_556_LC369	LC369	30	10	3.5	0.199	0.014	0.02812	0.00058	0.12467	0.0508	0.004	183	12	178.8	3.6	170	160	0.39	153000	126	<59	5.73	0.172	<4.1	461	449700	0.54	0.66	<0.048	0.0072	13.32	0.0548	1	2.29	0.73	11.13	3.07	37.2	13.32	68.9	14.62	149.3	31.5	10460	0.194
AM18	RIM	AM18 RIM	190502	190502_557_LC370	LC370	30	10	3.5
AM18	CORE	AM18 CORE	190502	190502_558_LC371	LC371	30	10	3.5	0.174	0.025	0.0265	0.0011	0.1564	0.0471	0.0068	163	21	168.6	6.7	20	270	2.7	153000	151	<120	5.1	0.237	<8	632	437800	0.68	0.66	<0.13	0.0093	18.1	0.084	1.33	3.07	1.09	14.7	4.02	51.1	18	93.9	20	201	42.7	10330	0.203
AM18	RIM	AM18 RIM	190502	190502_559_LC372	LC372	30	10	3.5	0.184	0.017	0.02624	0.00059	0.021125	0.0503	0.0048	171	15	167	3.7	170	210	<0.41	153000	35.8	<86	2.41	<0.066	<6.1	136.9	433600	0.276	0.54	<0.093	0.004	10.55	0.0142	0.23	0.46	0.269	2.52	0.594	8.41	3.49	21.46	5.05	62.6	17.32	11040	0.064
AM18	CORE	AM18 CORE	190502	190502_561_LC373	LC373	30	10	3.5	0.193	0.016	0.02684	0.00064	0.12936	0.0514	0.0044	178	14	170.7	4	220	180	99	153000	127	<64	4.28	0.148	8.7	475	432700	0.624	0.78	0.53	0.098	18.62	0.066	1.03	2.09	0.814	11.1	2.93	36.5	13.9	73.2	15.5	164.7	35.1	10500	0.197
AM18	RIM	AM18 RIM	190502	190502_562_LC374	LC374	30	10	3.5
AM18	CORE	AM18 CORE	190502	190502_563_LC375	LC375	30	10	3.5
AM18	RIM	AM18 RIM	190502	190502_564_LC376	LC376	30	10	3.5
AM18	CORE	AM18 CORE	190502	190502_566_LC377	LC377	30	10	3.5	0.193	0.012	0.02798	0.0008	0.32816	0.0493	0.0029	179	10	177.9	5	140	130	14	153000	146.8	<62	5.72	0.992	5.8	934	456000	0.93	0.67	0.111	0.119	23.4	0.176	2.92	5.53	1.6	25.4	6.75	82.7	28.2	140.7	28.9	283	56.3	10090	0.284
AM18	RIM	AM18 RIM	190502	190502_567_LC378	LC378	30	10	3.5	0.186	0.011	0.02655	0.0005	0.27544	0.0498	0.003	172.7	9.8	168.9	3.2	150	120	5.5	153000	36.1	<62	2.21	0.279	25.9	136	457200	0.276	0.84	0.044	0.0311	9.73	0.026	0.323	0.474	0.231	2.42	0.646	8.68	3.56	21.3	5.13	62.8	17.3	11680	0.06
AM18	CORE	AM18 CORE	190502	190502_568_LC379	LC379	30	10	3.5	0.238	0.023	0.02629	0.00071	0.28646	0.0646	0.0056	215	18	167.2	4.4	630	170	3630	153000	72	130	30	3.17	64	493	427000	0.727	2.2	40	0.044	16.5	0.08	1.49	2.23	0.9	10.8	3.02	37	13.7	75.5	16.8	184	42.9	10170	0.168
AM18	RIM	AM18 RIM	190502	190502_569_LC380	LC380	30	10	3.5	0.204	0.01	0.02612	0.00053	0.22112	0.0556	0.0027	188.1	8.7	166.2	3.4	400	110	417	153000	79.4	<60	9.8	0.128	21.8	594	447000	0.829	0.79	5.83	0.106	29.5	0.064	1.01	2.19	1.11	12.7	3.54	43.5	16.4	88.7	19.3	209	48.4	10170	0.149
AM18	CORE	AM18 CORE	190503	190503_006_LC381	LC381	30	10	3.5	0.189	0.014	0.02779	0.00064	0.02075	0.05	0.0039	175	12	176.7	4	170	170	5.6	153000	132	<67	5.6	0.235	<5.8	432	424000	0.69	0.83	<0.086	0.0085	14.07	0.046	0.73	1.91	0.544	9.47	2.86	35.5	12.93	68	14.92	144.9	32.7	10000	0.288
AM18	RIM	AM18 RIM	190503	190503_007_LC382	LC382	30	10	3.5	0.291	0.028	0.02841	0.0009	0.61478	0.0735	0.006	256	22	180.6	5.6	900	170	4.04	153000	59.9	<63	4.39	4.3	13.5	340	426500	0.665	3.2	0.053	0.127	18.4	0.073	0.71	1.21	0.565	6.13	1.96	24.2	9.81	53.6	12.32	129.3	32.26	9740	0.161
AM18	CORE	AM18 CORE	190503	190503_008_LC383	LC383	30	10	3.5
AM18	RIM	AM18 RIM	190503	190503_009_LC384	LC384	30	10	3.5	0.203	0.025	0.02635	0.0004	0.070397	0.0562	0.007	187	22	167.7	2.5	410	290	0.79	153000	50	<110	2.92	0.087	<7.9	199.4	407400	0.432	0.87	<0.079	<0.0068	10.62	0.0137	0.27	0.82	0.29	4.05	1.2	15.06	5.71	31.9	7.52	76.3	18.34	9790	0.125
AM18	CORE	AM18 CORE	190503	190503_011_LC385	LC385	30	10	3.5	0.229	0.017	0.03329	0.00087	0.1483	0.0501	0.0037	209	14	211.1	5.5	170	150	22.6	153000	470	<90	3.72	0.211	<7	990	416700	1.64	0.81	0.58	0.0092	9.7	0.0241	0.42	1.74	0.6	11.5	4.71	67.9	30.2	168	39.2	395	95	9340	0.56
AM18	RIM	AM18 RIM	190503	190503_012_LC386	LC386	30	10	3.5	0.34	0.057	0.02416	0.00078	0.050692	0.099	0.016	286	41	153.9	4.9	1250	340	36.5	153000	59	<68	3.68	2.15	120	91.9	420000	0.255	2.07	0.5	0.066	2.1	0.0233	0.36	0.46	0.295	2.23	0.673	7.67	2.59	13.4	2.74	27.1	6.36	9060	0.061
AM18	CORE	AM18 CORE	190503	190503_013_LC387	LC387	30	10	3.5	0.185	0.015	0.0262	0.00057	0.18697	0.0513	0.0041	172	13	166.7	3.6	220	170	1.69	153000	84	<88	3.36	0.252	<6.4	700	413000	0.918	0.66	<0.06	0.0286	28.9	0.127	2.04	3.94	1.55	18.1	4.84	57.6	21.1	107.7	23.54	232.1	52.5	9390	0.216
AM18	RIM	AM18 RIM	190503	190503_014_LC388	LC388	30	10	3.5	0.186	0.011	0.02739	0.00063	0.34187	0.0495	0.0027	172.9	9.1	174.2	4	150	120	<0.33	153000	60.5	<62	3.24	0.157	<4.5	369	476000	0.714	0.93	<0.068	<0.004	24	0.0476	0.85	1.8	0.698	8.65	2.41	28.7	11.15	57.4	13.39	138	30.8	11130	0.222
AM18	CORE	AM18 CORE	190503	190503_016_LC389	LC389	30	10	3.5	0.179	0.021	0.02657	0.00091	0.25748	0.0489	0.0056	166	18	169	5.7	110	240	0.61	153000	206	<98	7.2	0.261	<7.4	550	414500	0.81	0.85	<0.067	0.043	17.3	0.078	1.2	2.18	0.79	12.5	3.51	43.4	16.9	84.5	18.1	177	38.9	9320	0.233
AM18	RIM	AM18 RIM	190503	190503_017_LC390	LC390	30	10	3.5	0.18	0.011	0.0252	0.00061	0.2097	0.0519	0.003	168	9.2	160.4	3.8	260	130	4.28	153000	49.8	<79	3.81	0.82	16.6	196.9	433000	0.42	1.29	0.077	0.048	14.4	0.0338	0.48	0.83	0.533	3.61	1.121	14.09	5.65	29.7	7.26	80.8	22.03	10150	0.112
AM18	CORE	AM18 CORE	190503	190503_018_LC391	LC391	30	10	3.5	0.231	0.014	0.02791	0.00052	0.25962	0.0599	0.0035	210	11	177.4	3.3	600	110	24.7	153000	269	<58	6.19	1.63	48	1220	433000	1.69	1.76	<0.049	0.068	45	0.15	2.84	6.9	1.8	33.2	9.58	109.4	38.8	188	39.2	354	71.4	9420	0.441
AM18	RIM	AM18 RIM	190503	190503_019_LC392	LC392	30	10	3.5	0.19	0.018	0.02731	0.00076	0.021489	0.0505	0.005	176	16	173.7	4.8	180	210	<0.33	153000	64	<75	4.15	0.224	<5.7	322	444000	0.626	0.81	<0.059	<0.0049	13.56	0.0198	0.36	1.04	0.44	6.11	1.98	24.4	9.66	53.2	12.56	132.3	30.7	10390	0.176
AM18	CORE	AM18 CORE	190503	190503_021_LC393	LC393	30	10	3.5	0.198	0.023	0.0271	0.0011	0.32601	0.053	0.0056	183	20	172.3	6.9	290	230	220	153000	112	<87	7.5	2.6	25	910	451000	1.04	1.16	0.35	0.118	36	0.231	4.2	7.2	2.33	32	8.5	93	32.2	146	29.6	262	52.2	10240	0.269
AM18	RIM	AM18 RIM	190503	190503_022_LC394	LC394	30	10	3.5	0.191	0.01	0.02717	0.00038	0.046509	0.0513	0.0028	176.8	8.8	172.8	2.4	220	120	0.41	153000	47.2	<66	2.69	0.23	<4.8	214.3	419300	0.453	0.75	<0.052	0.005	13.54	0.0226	0.45	0.89	0.443	4.28	1.298	15.72	6.27	33.35	7.97	84.9	22.07	10040	0.114
AM18	CORE	AM18 CORE	190503	190503_023_LC395	LC395	30	10	3.5	0.209	0.03	0.0275	0.0012	0.087237	0.0551	0.0081	191	26	175.1	7.3	340	330	21.2	153000	183	<90	11.8	0.44	<6.5	555	433000	0.754	1.06	0.28	0.061	17.95	0.094	1.7	3.15	0.912	13.62	3.69	44.9	17.4	87.5	19	190	42.4	8080	0.249
AM18	RIM	AM18 RIM	190503	190503_024_LC396	LC396	30	10	3.5	0.201	0.024	0.02746	0.00087	0.31849	0.053	0.0059	185	20	174.6	5.5	250	230	1.07	153000	39.8	<68	2.21	0.2	<5	93.6	440000	0.358	0.98	1.63	<0.005	8.2	0.0045	0.12	0.279	0.115	1.63	0.523	6.99	2.79	14.98	3.65	40.4	9.34	11000	0.141
AM18	CORE	AM18 CORE	190503	190503_026_LC397	LC397	30	10	3.5	0.2016	0.0091	0.02807	0.00061	0.34617	0.0521	0.0022	186.2	7.7	178.4	3.8	270	93	0.51	153000	89.8	<57	4.73	0.163	<4.3	403	432000	0.885	0.76	<0.059	0.0041	27.6	0.052	0.93	1.82	0.603	9.39	2.77	33.2	12.1	63.4	13.97	141	31.2	10440	0.26
AM18	RIM	AM18 RIM	190503	190503_027_LC398	LC398	30	10	3.5	0.1871	0.009	0.02728	0.00048	0.1059	0.0494	0.0023	173.7	7.6	173.5	3	160	100	0.42	153000	36.8	<56	2.34	0.052	<4.3	144.6	432000	0.323	0.88	<0.032	0.0024	11.19	0.0167	0.298	0.64	0.315	2.77	0.803	10.02	4	21.47	5.35	58.9	15.48	10420	0.069
AM18	CORE	AM18 CORE	190503	190503_028_LC399	LC399	30	10	3.5	0.196	0.021	0.027	0.001	0.25156	0.0528	0.0054	181	18	171.4	6.4	270	220	<0.33	153000	146	<69	12.6	0.434	<4.9	793	457000	0.488	0.99	<0.066	0.0173	14.64	0.3	4.38	7.45	2.25	27	6.89	75	25.8	120.4	24.1	222.3	45.7	9080	0.189
AM18	RIM	AM18 RIM	190503	190503_029_LC400	LC400	30	10	3.5	0.1863	0.0088	0.02684	0.00078	0.28995	0.0505	0.0025	173.2	7.5	170.7	4.9	200	110	6.3	153000	35.2	<69	2.55	0.202	10.2	220.8	437000	0.541	1.04	0.11	0.061	17.82	0.032	0.44	0.72	0.401	4.07	1.16	14.62	6.17	34.3	8.91	99.3	25.4	11200	0.168
AM18	CORE	AM18 CORE	190503	190503_036_LC401	LC401	30	10	3.5	0.176	0.012	0.02646	0.00052	0.27832	0.0482	0.0032	164	11	168.3	3.3	80	130	26	153000	161	<59	6.56	0.7	7.1	751	428800	0.98	0.8	0.067	0.039	26.9	0.128	2.13	4.44	1.164	19.9	5.64	65.5	23.9	113.5	24.3	230	48.3	9580	0.288
AM18	RIM	AM18 RIM	190503	190503_037_LC402	LC402	30	10	3.5	0.184	0.01	0.02661	0.00044	0.2293	0.0504	0.0026	171.4	8.6	169.3	2.8	180	110	0.62	153000	36	<61	2.66	0.069	4.6	223.3	427000	0.395	0.759	<0.031	0.0038	14.14	0.0255	0.4	0.79	0.394	4.26	1.211	14.73	5.96	33.56	8.37	93.3	25.58	9940	0.09
AM18	CORE	AM18 CORE	190503	190503_038_LC403	LC403	30	10	3.5	0.19	0.016	0.02628	0.00061	0.22818	0.0526	0.0044	176	14	167.2	3.8	300	190	8.6	153000	131.5	<65	7.69	1.92	<5.7	839	431000	0.991	1.36	0.056	0.0394	20.7	0.142	2.55	5.16	1.81	21.7	6.06	71.2	26.5	128.5	26.8	255	55.1	8330	0.259
AM18	RIM	AM18 RIM	190503	190503_039_LC404	LC404	30	10	3.5	0.182	0.011	0.02701	0.0007	0.2016	0.049	0.0029	169.3	9.5	171.8	4.4	130	130	0.69	153000	52.7	<59	3	0.111	<4.9	214.4	434000	0.409	0.84	<0.056	0.0261	15.73	0.0331	0.53	1.09	0.471	5.04	1.45	16.75	6.37	33.7	7.7	83.6	19.98	10380	0.12
AM18	CORE	AM18 CORE	190503	190503_041_LC405	LC405	30	10	3.5	0.203	0.015	0.02865	0.00091	0.04381	0.052	0.0044	188	13	182.1	5.7	250	180	270	153000	132	<77	9.4	0.76	8.6	970	476000	2.01	0.92	1.69	0.091	87	0.355	5.5	9	1.86	30.3	7.55	82.2	30	149	33.6	333	74.3	10610	0.432
AM18	RIM	AM18 RIM	190503	190503_042_LC406	LC406	30	10	3.5	0.231	0.015	0.02553	0.00046	0.077147	0.067	0.005	213	14	162.5	2.9	770	150	299	153000	180	410	3.9	7	980	151.9	416400	0.349	1.64	1.55	0.4	12.8	0.058	0.67	0.64	0.349	3.12	0.835	10.03	4.03	22.6	5.23	60.3	16.44	9760	0.05
AM18	CORE	AM18 CORE	190503	190503_043_LC407	LC407	30	10	3.5	0.195	0.016	0.02727	0.0007	0.38294	0.0517	0.0039	180	14	173.4	4.4	240	160	<0.34	153000	45	<68	2.75	0.099	<4.8	524	451000	0.351	0.83	<0.063	0.0057	14.99	0.114	2.17	3.83	1.51	14.7	3.8	42.7	15.54	77.7	17.36	175.4	40.3	10170	0.091
AM18	RIM	AM18 RIM	190503	190503_044_LC408	LC408	30	10	3.5	0.191	0.02	0.02716	0.00085	0.099243	0.0516	0.0055	177	17	172.8	5.3	280	250	0.49	153000	39.1	<68	2.34	<0.05	<4.9	201	463000	0.366	0.89	<0.063	<0.0023	9.81	0.0171	0.3	0.85	0.356	3.23	0.985	13.29	5.6	31.5	7.98	91.6	22.5	10590	0.068
AM18	CORE	AM18 CORE	190503	190503_046_LC409	LC409	30	10	3.5
AM18	RIM	AM18 RIM	190503	190503_047_LC410	LC410	30	10	3.5	0.191	0.015	0.02711	0.0009	0.3179	0.0512	0.0038	177	13	172.4	5.6	220	160	1.48	153000	59	81	2.93	0.091	<4.5	241	456000	0.515	0.82	<0.054	0.1	14.42	0.039	0.44	0.9	0.397	4.22	1.233	15.67	6.68	36.5	9.01	100.3	25.4	10600	0.12
AM18	CORE	AM18 CORE	190503	190503_048_LC411	LC411	30	10	3.5	0.1832	0.0088	0.02681	0.0005	0.30912	0.0496	0.0023	170.4	7.6	170.6	3.2	158	99	20	153000	84	<60	4.2	0.295	<4.2	648	427700	1.143	0.83	0.17	0.016	38.3	0.138	2.31	4.4	1.44	18.3	5.01	56	20.3	100.6	22.1	219	50	9760	0.248
AM18	RIM	AM18 RIM	190503	190503_049_LC412	LC412	30	10	3.5
AM18	CORE	AM18 CORE	190503	190503_051_LC413	LC413	30	10	3.5	0.184	0.01	0.02769	0.00061	0.18581	0.049	0.0029	172.8	9.3	176.1	3.8	110	120	4.6	153000	60.8	<56	3.24	0.104	<4.2	390	422000	0.501	0.843	<0.054	0.0113	15.54	0.055	0.89	1.58	0.72	7.7	2.19	27.8	11.16	62.6	14.93	161.8	40.6	9880	0.112
AM18	RIM	AM18 RIM	190503	190503_052_LC414	LC414	30	10	3.5	0.1913	0.008	0.02777	0.00059	0.53793	0.0505	0.002	177.4	6.8	176.6	3.7	193	84	13	153000	60.3	<55	3.81	0.098	<4.3	431	426200	0.672	0.783	0.12	0.0106	24.5	0.0484	0.74	1.65	0.827	8.89	2.57	30.8	12.23	65.4	15	160.1	40.2	9630	0.117
AM4	CORE	AM4 CORE	190503	190503_053_LC415	LC415	30	10	3.5	0.196	0.018	0.02695	0.00063	0.078898	0.0534	0.005	180	15	171.4	3.9	250	180	<0.28	153000	130.1	<58	10.07	0.474	<4.1	579	448000	0.456	0.857	0.055	0.0032	12.83	0.085	1.53	3.76	1.12	18.4	5.04	54.7	18.5	85.2	17.1	161	32.5	9720	0.157
AM4	RIM	AM4 RIM	190503	190503_054_LC416	LC416	30	10	3.5	0.204	0.026	0.02658	0.00078	0.029246	0.056	0.0071	187	22	169.1	4.9	360	270	1.66	153000	167	<78	12.1	0.75	<5.5	361.9	432000	0.514	0.82	<0.084	0.0065	11	0.045	0.92	1.78	0.457	9.11	2.7	30.61	10.99	55	12.04	112.4	24.13	9120	0.201
AM4	CORE	AM4 CORE	190503	190503_056_LC417	LC417	30	10	3.5	0.182	0.016	0.0268	0.00063	0.057968	0.0496	0.0045	169	13	170.5	4	120	180	23	153000	186.9	<58	14.22	1.69	<3.8	528	444000	0.646	0.89	0.14	0.058	15.49	0.127	1.98	3.69	1.014	15.08	4.41	48.2	17.12	83.1	17.29	163.9	33.8	8790	0.226
AM4	RIM	AM4 RIM	190503	190503_057_LC418	LC418	30	10	3.5	0.202	0.02	0.02548	0.00052	0.24	0.0573	0.0057	185	16	162.2	3.2	390	190	8.1	153000	150.8	<81	7.79	1.24	9.4	367	439000	0.97	1.08	1.75	0.0215	18.06	0.0258	0.67	1.41	0.406	8.09	2.41	29.2	11.05	54.8	12.19	122.5	26.3	10920	0.333
AM4	CORE	AM4 CORE	190503	190503_058_LC419	LC419	30	10	3.5	0.1805	0.0079	0.02603	0.00041	0.1182	0.0504	0.0023	168.2	6.8	165.7	2.6	189	96	0.69	153000	343	<53	16.74	1.056	<4.2	2416	451000	1.598	0.82	<0.01	0.076	35.6	0.608	7.97	14.81	4.21	79.4	21.8	239	79.8	365	70.1	636	126.8	8560	0.464
AM4	RIM	AM4 RIM	190503	190503_059_LC420	LC420	30	10	3.5	0.193	0.015	0.02543	0.00061	0.38117	0.0552	0.004	179	13	161.9	3.8	400	160	2.32	153000	322	<95	14.2	5.55	40	2330	438000	1.55	2.31	0.66	0.097	33.5	0.56	6.94	12.3	3.45	63.5	18.9	214	74.2	341	67.1	617	123.7	8990	0.524
AM4	CORE	AM4 CORE	190503	190503_066_LC421	LC421	30	10	3.5	0.18	0.016	0.02698	0.00057	0.21307	0.0483	0.0043	167	14	171.6	3.6	60	170	3.41	153000	224.2	<54	15.57	0.446	<4.5	549	448000	0.611	0.93	<0.079	0.0111	13.28	0.141	2.17	3.65	0.967	15.76	4.25	49.2	17.31	84.6	17.79	171.5	37.7	8590	0.291
AM4	RIM	AM4 RIM	190503	190503_067_LC422	LC422	30	10	3.5	0.187	0.014	0.02715	0.00067	0.36408	0.05	0.0036	173	12	172.7	4.2	190	160	11.2	153000	103.8	<56	7.88	0.694	13.8	214.7	465000	0.674	0.98	0.38	0.033	14.97	0.0334	0.5	0.95	0.295	4.19	1.313	16	6.35	33.9	7.98	86.1	19.32	11280	0.279
AM4	CORE	AM4 CORE	190503	190503_068_LC423	LC423	30	10	3.5
AM4	RIM	AM4 RIM	190503	190503_069_LC424	LC424	30	10	3.5	0.189	0.017	0.02611	0.0009	0.19313	0.0527	0.0048	175	14	166.1	5.6	270	190	10.4	153000	122.6	<69	7.82	0.301	7	277.4	467000	0.568	0.88	0.087	0.017	12.22	0.0282	0.49	1.23	0.362	6.08	1.84	22.6	8.49	42.4	9.95	99.4	21.2	11090	0.227
AM4	CORE	AM4 CORE	190503	190503_071_LC425	LC425	30	10	3.5	0.207	0.02	0.02676	0.00092	0.44865	0.0571	0.0051	193	18	170.2	5.8	400	180	1.13	153000	139.4	<52	13.61	0.457	<3.9	563	445000	0.546	0.76	<0.031	0.007	14.15	0.101	1.7	3.73	0.94	17.2	4.87	55.5	18.9	86.2	18.6	173	33.8	9450	0.181
AM4	RIM	AM4 RIM	190503	190503_072_LC426	LC426	30	10	3.5	0.187	0.02	0.02595	0.00085	0.43413	0.0523	0.0051	173	17	165.2	5.4	250	210	0.8	153000	241	114	6.18	0.312	<5.4	325.8	432000	0.893	0.72	<0.053	0.22	17.62	0.086	0.83	1.25	0.38	6.6	2.1	26.6	9.75	49.9	11.26	109.8	24.6	11240	0.343
AM4	CORE	AM4 CORE	190503	190503_073_LC427	LC427	30	10	3.5	0.438	0.049	0.0334	0.0019	0.10653	0.096	0.011	366	35	212	12	1450	260	3.38	153000	154	<75	11.13	1.16	<5.4	302	463000	0.547	0.86	<0.062	0.011	13.32	0.0329	0.36	1.49	0.439	7.22	2.21	25.5	9.4	47.1	10.43	103.7	21.3	9810	0.18
AM4	RIM	AM4 RIM	190503	190503_074_LC428	LC428	30	10	3.5	0.181	0.016	0.02751	0.0007	0.24608	0.0488	0.0046	171	15	174.9	4.4	80	180	3.03	153000	135.4	<55	11.12	0.391	<4	279.9	446600	0.551	0.75	<0.057	<0.0027	12.23	0.0368	0.562	1.22	0.387	6.51	2.041	24.3	8.75	43.2	9.57	93.9	19.86	9840	0.187
AM4	CORE	AM4 CORE	190503	190503_076_LC429	LC429	30	10	3.5	0.197	0.017	0.02631	0.00065	0.123	0.055	0.0051	181	14	167.4	4.1	300	190	<0.28	153000	144.1	<59	11.64	0.746	<4.1	705	446000	0.485	0.81	<0.01	0.0048	15.59	0.122	2.56	4.91	1.428	22.31	6.33	68.3	22.9	104.1	21.3	196.8	39.34	9260	0.156
AM4	RIM	AM4 RIM	190503	190503_077_LC430	LC430	30	10	3.5	0.188	0.013	0.02723	0.00043	0.18367	0.0508	0.0036	174	11	173.2	2.7	180	140	2.53	153000	138.7	<57	8.14	0.343	<4.1	314.8	452000	0.738	0.82	<0.052	0.0146	15.07	0.032	0.54	1.18	0.369	6.84	2.209	26.26	9.64	48.9	10.81	105	22.73	10850	0.262
AM4	CORE	AM4 CORE	190503	190503_078_LC431	LC431	30	10	3.5	0.192	0.016	0.02658	0.00056	0.013822	0.0528	0.0046	177	13	169.1	3.5	240	180	2.93	153000	170.7	<62	11.31	0.399	<4.1	362.4	449300	0.68	0.85	<0.063	0.0039	15.13	0.0394	0.68	1.87	0.546	9.19	2.711	31.34	11.37	54.2	11.73	111.2	23.79	9930	0.225
AM4	RIM	AM4 RIM	190503	190503_079_LC432	LC432	30	10	3.5	0.179	0.011	0.02727	0.00051	0.013007	0.0477	0.003	166.2	9.4	173.4	3.2	60	130	0.78	153000	105.9	<54	6.15	0.235	<3.8	309.4	445000	0.955	0.779	<0.04	<0.0021	18.76	0.0207	0.42	0.999	0.316	5.6	1.963	24.9	9.28	48.8	11.15	117.4	25.29	12010	0.4
AM4	CORE	AM4 CORE	190503	190503_081_LC433	LC433	30	10	3.5	0.184	0.017	0.02619	0.0007	0.41005	0.0509	0.0045	171	14	166.7	4.4	170	170	4.9	153000	133.4	<79	6.18	1.38	26	559	439400	0.77	1.32	1.71	0.036	17.7	0.08	1.4	2.83	0.681	12.9	3.99	45.7	16.9	84.5	18.1	178	38.7	10630	0.256
AM4	CORE	AM4 CORE	190503	190503_082_LC434	LC434	30	10	3.5	0.1906	0.0077	0.02597	0.00061	0.3524	0.0533	0.0022	176.9	6.6	165.3	3.8	320	89	19.2	153000	60	<68	3.58	1.37	21	470	451000	0.6	0.93	1.86	0.319	18.8	0.358	3	2.82	1.02	11.7	3.07	36.8	13.6	69	16.6	178	43.7	13000	0.239
AM4	CORE	AM4 CORE	190503	190503_083_LC435	LC435	30	10	3.5	0.186	0.019	0.0264	0.00074	0.064414	0.0515	0.0056	172	16	167.9	4.6	170	220	3.8	153000	160.1	<59	12.86	0.88	<4.4	608	445000	0.55	0.86	0.025	0.008	17.5	0.155	2.94	5.51	1.48	20.9	5.56	58.4	19.6	89.1	18.2	165	33.5	9280	0.167
AM4	RIM	AM4 RIM	190503	190503_084_LC436	LC436	30	10	3.5	0.1764	0.0093	0.02652	0.00049	0.20095	0.0483	0.0025	164.5	8	168.7	3.1	100	110	0.39	153000	127.7	<52	6.26	0.237	<4.6	376.9	445700	1.046	0.725	<0.054	<0.0025	21.73	0.0253	0.51	1.44	0.351	8.12	2.463	30.55	11.48	58	13.18	129.4	28.1	11670	0.421
AM4	CORE	AM4 CORE	190503	190503_086_LC437	LC437	30	10	3.5
AM4	RIM	AM4 RIM	190503	190503_087_LC438	LC438	30	10	3.5	0.198	0.016	0.02708	0.00072	0.28132	0.0543	0.0044	183	13	172.2	4.5	310	170	5.98	153000	124.5	<70	8.81	0.285	<4.5	219.1	453000	0.55	0.85	0.052	<0.0026	12.14	0.0215	0.3	0.94	0.264	4.41	1.456	17.27	6.54	33.5	7.71	75.7	16.49	10300	0.195
AM4	CORE	AM4 CORE	190503	190503_088_LC439	LC439	30	10	3.5	0.19	0.011	0.02693	0.00069	0.0030232	0.0515	0.0032	176.5	9.1	171.3	4.3	250	140	56	153000	246	<110	10.4	3.04	<7.8	1537	427000	2.36	0.86	<0.15	0.048	67.2	0.3	5.76	11.6	2.63	54.3	14.7	149.4	50.7	222	43.3	383	77	8520	0.561
AM4	RIM	AM4 RIM	190503	190503_089_LC440	LC440	30	10	3.5	0.2257	0.0089	0.0259	0.00044	0.01843	0.0634	0.0027	206.3	7.3	164.8	2.8	687	90	34.8	153000	106.6	370	6.34	2.49	91	294	444900	0.854	0.95	0.95	0.82	24.4	0.4	2.32	1.45	0.342	5.66	1.75	21.2	8.51	45	10.78	114.9	28.5	12320	0.269
AM4	CORE	AM4 CORE	190503	190503_096_LC441	LC441	30	10	3.5	0.18	0.014	0.02605	0.00052	0.10573	0.0503	0.0041	167	12	165.8	3.3	150	160	2.67	153000	174.4	<56	14.18	0.583	<4.1	558	446000	0.537	0.812	<0.032	0.0098	15.56	0.158	2.44	4.48	1.165	17.82	4.92	53.8	17.74	82.6	17.02	160.6	33.58	8950	0.202
AM4	RIM	AM4 RIM	190503	190503_097_LC442	LC442	30	10	3.5	0.192	0.018	0.0272	0.00089	0.19845	0.0521	0.0056	177	16	173	5.6	200	220	8.2	153000	138.6	<54	12.44	0.364	<3.8	243.9	447000	0.506	0.77	<0.054	0.0037	12.45	0.0278	0.54	1.2	0.385	5.85	1.8	21.1	7.87	38.9	8.48	84.6	17.44	9690	0.183
AM4	CORE	AM4 CORE	190503	190503_098_LC443	LC443	30	10	3.5	0.1966	0.0096	0.02695	0.00041	0.15183	0.0529	0.0026	181.9	8.2	171.4	2.6	300	110	2.43	153000	200	<64	14.5	0.851	6	1427	475000	0.909	0.78	<0.074	0.061	21.99	0.427	6.2	8.16	2.5	40.2	11.55	130.3	46.3	216	43.7	403	85.9	10350	0.298
AM4	RIM	AM4 RIM	190503	190503_099_LC444	LC444	30	10	3.5	0.188	0.015	0.02748	0.00051	0.13772	0.0494	0.004	174	13	174.7	3.2	120	170	1.61	153000	160.9	<60	11.59	0.405	<4.5	773	421800	0.485	0.82	<0.095	0.0182	14.7	0.214	3.36	5.81	1.65	23.4	6.45	71	24.8	114.9	23.7	219	45.3	9430	0.199
AM4	CORE	AM4 CORE	190503	190503_101_LC445	LC445	30	10	3.5	0.173	0.014	0.02725	0.0005	0.060326	0.0464	0.0038	161	12	173.3	3.2	0	150	4.5	153000	194	<58	12.66	0.348	<4.1	762	453000	0.574	0.78	<0.048	0.0187	13.98	0.2	3.09	5.52	1.65	23.7	6.66	71	24.6	112.6	23.2	216	44.3	9270	0.216
AM4	RIM	AM4 RIM	190503	190503_102_LC446	LC446	30	10	3.5	0.181	0.012	0.02639	0.0005	0.0048287	0.0501	0.0035	168	10	167.9	3.1	150	140	0.97	153000	149.6	<59	7.48	0.25	<4.2	391.1	447800	0.772	0.809	<0.047	<0.0032	16.01	0.0238	0.62	1.52	0.433	8.78	2.81	33.25	12.05	60.8	13.35	130.6	28.89	11120	0.292
AM4	CORE	AM4 CORE	190503	190503_103_LC447	LC447	30	10	3.5	0.1807	0.0066	0.02569	0.00059	0.027128	0.0511	0.0022	168.5	5.7	163.5	3.7	225	93	6.2	153000	275	<65	7.52	6.86	5.5	2177	426000	4.93	0.96	0.169	0.084	132.3	0.422	7.18	16.74	3.17	75.7	20.31	213.2	70.8	309	60.9	529	102.3	8990	1.291
AM4	RIM	AM4 RIM	190503	190503_104_LC448	LC448	30	10	3.5	0.194	0.017	0.02612	0.00058	0.077253	0.0544	0.0051	179	15	166.2	3.6	280	190	2.71	153000	131.7	<59	6.95	0.363	13.9	313	450500	0.787	0.89	0.152	0.0043	14.43	0.0217	0.359	1.23	0.308	5.85	1.97	23.9	9.43	49	11.17	113.5	24.03	11360	0.297
AM4	CORE	AM4 CORE	190503	190503_106_LC449	LC449	30	10	3.5	0.183	0.013	0.0276	0.00065	0.046564	0.0482	0.0035	170	11	175.5	4.1	90	150	0.58	153000	159	<62	21.9	0.605	<4.3	825	445000	0.576	0.78	<0.068	0.064	18.26	0.567	7.78	10.22	1.7	32.6	8.23	84.6	26.76	120.6	23.65	214.6	43.2	9960	0.276
AM4	RIM	AM4 RIM	190503	190503_107_LC450	LC450	30	10	3.5	0.176	0.013	0.02534	0.00044	0.32469	0.051	0.0034	165	11	161.3	2.8	210	150	20.7	153000	112	<100	15.3	0.74	18	514	422000	0.446	0.99	0.22	0.202	14.95	0.446	5.18	5.66	1.09	18.9	4.94	49.3	16.27	76.2	15.52	149.2	33.1	10450	0.216
AM4	CORE	AM4 CORE	190503	190503_108_LC451	LC451	30	10	3.5	0.191	0.015	0.02686	0.00059	0.082384	0.0521	0.0045	176	13	170.8	3.7	210	180	1.68	153000	139.2	<55	9.13	0.359	<3.9	298.4	447600	0.606	0.82	<0.011	0.0101	14.28	0.0192	0.5	1.16	0.355	6.53	2.037	24.86	9.26	46.3	10.29	100.3	22.04	10370	0.222
AM4	RIM	AM4 RIM	190503	190503_109_LC452	LC452	30	10	3.5	0.2	0.015	0.02686	0.0005	0.21982	0.054	0.0038	184	12	170.8	3.1	300	150	1.39	153000	137	<59	8.11	0.347	<4.2	337	443800	0.707	0.73	<0.033	<0.0036	13.85	0.0209	0.43	1.28	0.314	6.63	2.14	26.81	10.22	54.1	12.31	119.2	25.19	10600	0.283
AM4	CORE	AM4 CORE	190503	190503_111_LC453	LC453	30	10	3.5	0.199	0.02	0.02744	0.00055	0.16746	0.0526	0.0051	182	17	174.5	3.5	220	200	42	153000	124	<61	6.93	0.85	<4	405	447000	0.8	0.92	0.157	0.048	18.2	0.075	1.11	2.12	0.41	9.3	3.12	35.6	12.7	63	12.8	125	27.3	11430	0.297
AM4	RIM	AM4 RIM	190503	190503_112_LC454	LC454	30	10	3.5	0.188	0.01	0.02684	0.00058	0.26294	0.0508	0.0028	174.4	8.8	170.7	3.7	210	120	<0.3	153000	117.5	<58	5.77	0.231	<3.9	378.9	442000	1.08	0.81	<0.063	0.0059	20.39	0.0296	0.53	1.56	0.339	8.05	2.569	29.69	11.4	58.6	13.11	131.4	28.57	12060	0.457
AM4	CORE	AM4 CORE	190503	190503_113_LC455	LC455	30	10	3.5	0.208	0.017	0.0261	0.00077	0.010885	0.0581	0.0051	191	15	166.1	4.9	480	190	6.3	153000	137	<120	8.4	0.94	11.1	530	463000	0.676	0.86	0.21	0.046	18.05	0.096	1.47	2.73	0.67	13.3	3.84	44.6	15.95	81	17.76	175.5	39.76	11190	0.245
AM4	CORE	AM4 CORE	190503	190503_114_LC456	LC456	30	10	3.5
AM4	RIM	AM4 RIM	190503	190503_116_LC457	LC457	30	10	3.5	0.191	0.014	0.02667	0.0006	0.19433	0.0525	0.0042	177	12	169.7	3.8	240	170	113	153000	182.7	<53	17.06	0.4	<3.8	387.1	439700	0.564	0.73	0.72	0.045	14.33	0.0642	1.04	2.11	0.588	9.69	2.876	33.15	11.96	58.3	12.53	118.6	26.25	9000	0.217
AM4	CORE	AM4 CORE	190503	190503_117_LC458	LC458	30	10	3.5
AM4	CORE	AM4 CORE	190503	190503_118_LC459	LC459	30	10	3.5	0.173	0.016	0.02662	0.00066	0.30389	0.0471	0.0042	161	14	169.4	4.1	40	170	1.41	153000	126.5	<62	13.57	0.442	<4	430	443700	0.435	0.79	<0.043	0.0095	13.14	0.095	1.23	3.07	0.79	13	3.67	40.6	13.9	64.6	13	121	24.3	9600	0.15
AM4	RIM	AM4 RIM	190503	190503_119_LC460	LC460	30	10	3.5	0.193	0.0097	0.02694	0.00055	0.023871	0.052	0.0029	178.9	8.3	171.3	3.4	250	120	129	153000	134.9	<54	15.3	0.743	4.7	359	466000	0.749	0.89	1.42	0.105	17.26	0.1	1.12	1.94	0.592	8.46	2.59	29.85	10.89	54.2	11.91	117.6	26.28	10280	0.241
AM4	CORE	AM4 CORE	190503	190503_126_LC461	LC461	30	10	3.5	0.188	0.015	0.02689	0.00064	0.12093	0.0518	0.0044	174	13	171	4	200	170	1.89	153000	173.3	<60	12.19	0.941	<3.9	724	443000	0.527	0.719	<0.066	0.0127	17.95	0.205	3.42	6.7	1.768	25.8	6.69	70.3	23.38	105.9	21.33	195.8	40.3	9530	0.201
AM4	RIM	AM4 RIM	190503	190503_127_LC462	LC462	30	10	3.5	0.192	0.01	0.02683	0.00052	0.048688	0.052	0.003	177.6	8.8	170.7	3.2	240	120	0.74	153000	135.7	<49	6.29	0.303	<4	361.7	433000	0.961	0.71	<0.01	<0.0039	19.01	0.0267	0.53	1.52	0.348	7.77	2.337	29.89	11.1	56.4	12.65	124.6	27.36	11360	0.377
AM4	CORE	AM4 CORE	190503	190503_128_LC463	LC463	30	10	3.5	0.179	0.015	0.02603	0.00074	0.4455	0.0497	0.0036	167	13	165.6	4.7	150	150	26	153000	240	<66	12.3	1.72	<4.6	1780	453000	2.73	0.83	0.09	0.106	55	0.313	5.6	12	2.99	58	16.5	179	60	265	51.2	453	90	9770	0.58
AM4	RIM	AM4 RIM	190503	190503_129_LC464	LC464	30	10	3.5	0.205	0.03	0.0285	0.00077	0.18975	0.0523	0.0076	188	25	181.1	4.8	210	300	16	153000	137	<94	9.9	0.46	82	306	434400	0.523	0.88	0.08	0.03	12.78	0.049	0.63	1.37	0.45	7.09	2.23	25.5	9.31	47.3	9.98	99.3	22.9	9840	0.186
AM4	CORE	AM4 CORE	190503	190503_131_LC465	LC465	30	10	3.5
AM4	RIM	AM4 RIM	190503	190503_132_LC466	LC466	30	10	3.5
AM4	CORE	AM4 CORE	190503	190503_133_LC467	LC467	30	10	3.5	0.187	0.016	0.02696	0.00051	0.093601	0.0505	0.0045	173	14	171.5	3.2	140	180	2.86	153000	176.2	<52	12.83	0.95	<4	668	435900	0.549	0.839	<0.06	0.019	15.17	0.153	2.4	5.1	1.33	20.93	5.66	61.6	21.03	98.5	20.03	187.7	38.9	8860	0.201
AM4	RIM	AM4 RIM	190503	190503_134_LC468	LC468	30	10	3.5	0.181	0.02	0.02693	0.00086	0.25315	0.0495	0.0055	168	17	171.3	5.4	110	230	4.22	153000	188.2	<62	11.96	0.316	<4.8	404	462000	0.573	0.8	<0.056	<0.0032	11.38	0.0502	0.8	1.82	0.533	10.09	2.9	35.1	12.67	61.9	13.27	131.7	28.07	9510	0.229
AM4	CORE	AM4 CORE	190503	190503_136_LC469	LC469	30	10	3.5	0.21	0.022	0.02656	0.00074	0.037576	0.058	0.0065	192	18	169	4.6	400	230	4.88	153000	129.3	<63	12.45	0.419	<4.8	275.9	441200	0.469	1.15	0.153	<0.0047	11.07	0.0363	0.66	1.42	0.393	6.96	1.957	23.94	8.57	41.94	9.21	88.1	19.22	9530	0.191
AM4	RIM	AM4 RIM	190503	190503_137_LC470	LC470	30	10	3.5	0.229	0.025	0.02788	0.00083	0.27856	0.0614	0.0076	207	21	177.3	5.2	520	240	190	153000	112.3	<67	10.9	0.409	10.9	230	458000	0.586	0.78	1.8	0.046	13.64	0.0281	0.47	0.99	0.309	4.99	1.52	20.2	7.4	37.2	8.39	84.8	17.51	10420	0.228
AM4	CORE	AM4 CORE	190503	190503_138_LC471	LC471	30	10	3.5	0.185	0.012	0.02732	0.0005	0.022621	0.0494	0.0033	172	10	173.7	3.2	150	140	1.3	153000	159.7	<60	11.48	0.772	<4.3	407	443000	0.597	0.81	<0.069	0.0466	14.54	0.0542	0.92	2.28	0.653	10.93	3.11	36.2	12.8	62	13.23	125.5	26.16	9780	0.232
AM4	RIM	AM4 RIM	190503	190503_139_LC472	LC472	30	10	3.5	0.184	0.011	0.02667	0.00051	0.0067176	0.0502	0.0031	170.6	9.5	169.7	3.2	170	130	3	153000	118.3	<55	6.15	0.321	<3.7	363	437000	0.827	0.77	<0.041	0.0263	17.38	0.026	0.4	1.34	0.354	7.16	2.303	29.08	11.25	57.6	12.77	129.3	27.9	11620	0.34
AM4	CORE	AM4 CORE	190503	190503_141_LC473	LC473	30	10	3.5	0.188	0.017	0.02752	0.00049	0.20034	0.0496	0.0045	174	15	175	3.1	130	190	4.84	153000	153.7	<66	10.44	1.12	<4.2	406	430600	0.547	0.666	<0.055	0.0109	12.91	0.072	1.4	2.22	0.636	10.62	3.07	35.3	12.48	61	13.24	125.6	27.18	9530	0.209
AM4	RIM	AM4 RIM	190503	190503_142_LC474	LC474	30	10	3.5	0.183	0.017	0.02521	0.00062	0.33098	0.0526	0.0047	170	15	160.5	3.9	250	190	1.6	153000	138.2	<66	7.39	0.321	<4.8	357.5	447400	0.828	0.62	<0.069	0.0069	15.43	0.0306	0.42	1.24	0.335	7.75	2.41	29.6	10.73	55.8	12.5	123.3	27.14	11190	0.314
AM4	CORE	AM4 CORE	190503	190503_143_LC475	LC475	30	10	3.5	0.183	0.018	0.02665	0.00084	0.21158	0.0498	0.0049	170	15	169.5	5.3	140	200	1.9	153000	173	<70	11.61	0.402	<4.7	745	465000	0.515	0.68	<0.045	0.0155	15.06	0.243	3.95	6.57	1.78	24.3	6.39	69.5	23.2	109.1	22.91	213.8	43.7	9370	0.188
AM4	RIM	AM4 RIM	190503	190503_144_LC476	LC476	30	10	3.5	0.189	0.012	0.02849	0.00092	0.12018	0.0484	0.0032	175	10	181.1	5.7	100	140	1.69	153000	135.6	<59	6.2	0.227	<4.1	318	454000	0.894	0.92	<0.055	0.039	17.94	0.029	0.56	1.22	0.328	6.3	2.15	25	9.66	50.3	11.4	120.7	25.5	11650	0.397
AM4	CORE	AM4 CORE	190503	190503_146_LC477	LC477	30	10	3.5	0.206	0.023	0.02655	0.00074	0.053821	0.0566	0.0065	188	19	168.9	4.6	360	240	4.43	153000	272	<58	14.6	0.439	<4.2	357.9	466000	0.623	0.67	<0.016	0.059	16.24	0.076	0.89	1.8	0.534	9.2	2.74	31.27	11.07	53.7	11.69	110.9	23.24	9530	0.221
AM4	RIM	AM4 RIM	190503	190503_147_LC478	LC478	30	10	3.5	0.221	0.015	0.02732	0.0006	0.25747	0.0591	0.0047	202	13	173.7	3.8	510	170	74	153000	101.3	<86	10	1.2	46	260.6	449800	0.559	0.97	0.68	0.06	12.8	0.039	0.29	0.91	0.252	4.46	1.471	18.32	7.46	41.1	9.69	108	26.02	12030	0.225
AM4	CORE	AM4 CORE	190503	190503_148_LC479	LC479	30	10	3.5	0.182	0.012	0.02696	0.00059	0.13547	0.0491	0.0032	171.2	9.5	171.5	3.7	150	120	2.4	153000	217	<62	11.72	0.535	<4.1	1070	443700	0.806	0.732	<0.049	0.0268	20.2	0.268	3.86	6.86	1.73	31.9	9	100	34.2	162	32.8	294	61	9100	0.273
AM4	RIM	AM4 RIM	190503	190503_149_LC480	LC480	30	10	3.5	0.172	0.013	0.02699	0.00065	0.051191	0.0465	0.0036	161	11	171.7	4.1	20	160	2.69	153000	123	<57	10.07	0.297	<4.2	258	454200	0.543	0.7	<0.053	<0.0033	12.51	0.0222	0.358	1.04	0.388	5.46	1.721	21.22	8.09	40.7	9.07	88.5	19.35	10560	0.22
AM4	CORE	AM4 CORE	190503	190503_156_LC481	LC481	30	10	3.5	0.215	0.014	0.02847	0.00071	0.27269	0.0547	0.0032	197	11	181	4.4	390	140	350	153000	111.2	<51	7.81	1.99	<4	398	452000	0.78	0.87	0.28	0.064	18.2	0.063	1.14	2.27	0.56	10.1	2.88	34.9	12.3	60.3	13.1	132	26.4	11090	0.303
AM4	RIM	AM4 RIM	190503	190503_157_LC482	LC482	30	10	3.5	0.193	0.014	0.02692	0.00052	0.24671	0.0517	0.0036	178	12	171.2	3.3	220	150	0.75	153000	142	<52	6.76	0.84	<3.8	345.5	441600	0.809	0.86	<0.065	0.008	17.1	0.0269	0.55	1.33	0.324	7.3	2.268	28.7	10.68	54.3	12.15	121.3	26.26	11190	0.342
AM4	CORE	AM4 CORE	190503	190503_158_LC483	LC483	30	10	3.5	0.187	0.016	0.02696	0.00055	0.31195	0.0503	0.0042	173	14	171.5	3.5	150	170	7.6	153000	221.9	<57	15.24	0.61	<4.2	799	448100	0.536	0.79	<0.034	0.0276	16.17	0.305	4.25	6.53	1.66	25.1	6.7	74.6	25.26	117.3	23.93	219.4	44.9	9120	0.215
AM4	RIM	AM4 RIM	190503	190503_159_LC484	LC484	30	10	3.5	0.195	0.016	0.02754	0.00067	0.056	0.0519	0.0045	180	14	175.1	4.2	210	180	5.73	153000	145.6	<59	10.09	0.322	<3.7	254.7	438500	0.533	0.77	<0.033	<0.0029	12.1	0.0245	0.49	1.19	0.365	5.87	1.806	21.05	7.79	39.42	8.6	83.3	18.23	9710	0.181
AM4	CORE	AM4 CORE	190503	190503_161_LC485	LC485	30	10	3.5	0.177	0.018	0.02678	0.00068	0.052803	0.0485	0.0051	164	15	170.4	4.3	50	200	0.77	153000	208.6	<64	10.32	0.279	<4.4	570	439500	0.515	0.642	<0.062	0.0049	9.91	0.067	1.48	2.98	0.928	13.45	4.1	47.7	17.9	89.9	19.14	184.7	42.4	8450	0.213
AM4	RIM	AM4 RIM	190503	190503_162_LC486	LC486	30	10	3.5	0.186	0.013	0.02668	0.00048	0.070933	0.0514	0.004	173	11	169.7	3	190	150	3.39	153000	940	910	9.35	0.427	<4.5	302.1	447600	0.61	0.797	<0.072	0.85	16.7	0.46	2.84	1.59	0.433	7.02	2.08	25.07	9.37	47	10.44	102.1	22.38	10420	0.208
AM4	CORE	AM4 CORE	190503	190503_163_LC487	LC487	30	10	3.5	0.247	0.035	0.02648	0.00093	0.59568	0.0672	0.0083	222	28	168.5	5.9	730	250	1030	153000	163	360	9.97	1.01	32	504	424800	0.411	0.73	0.74	0.076	13.03	0.107	2.19	3.39	0.84	14.6	4.01	46.5	15.8	74.8	15.2	145	31	9520	0.183
AM4	RIM	AM4 RIM	190503	190503_164_LC488	LC488	30	10	3.5	0.182	0.025	0.02772	0.00083	0.27322	0.0483	0.0074	169	22	176.2	5.2	60	300	1.1	153000	149	<96	7.61	0.35	<6.3	356.3	428100	0.604	1.04	<0.09	0.061	14.06	0.054	0.71	1.55	0.447	8.04	2.45	28.9	11.07	55.8	12.2	118.2	27.57	9710	0.183
AM4	CORE	AM4 CORE	190503	190503_166_LC489	LC489	30	10	3.5	0.207	0.019	0.02688	0.00066	0.22591	0.0558	0.005	190	16	171	4.1	370	180	2.34	153000	129.1	<64	7.69	0.75	12.1	588	432300	0.471	0.86	<0.048	0.0228	15.71	0.109	2.07	4.35	0.98	17.68	4.82	54.9	18.58	86.5	17.38	158.6	33.4	10110	0.17
AM4	RIM	AM4 RIM	190503	190503_167_LC490	LC490	30	10	3.5	0.189	0.01	0.0271	0.00041	0.19504	0.0511	0.0025	175.4	8.6	172.3	2.6	220	100	0.67	153000	109.1	<59	4.42	0.162	<4.2	304.2	442900	0.753	0.701	<0.034	0.007	14.82	0.0152	0.347	0.907	0.256	5.67	1.901	23.76	9.23	48.8	11.33	115.8	25.98	12950	0.313
AM4	CORE	AM4 CORE	190503	190503_168_LC491	LC491	30	10	3.5	0.1937	0.0079	0.02745	0.00043	0.24927	0.0511	0.0021	179.4	6.7	174.5	2.7	230	91	1	153000	204.8	<51	12.63	1	14.8	650	442800	0.917	0.78	0.087	0.0398	23.2	0.1	1.64	3.38	0.983	15.42	4.7	56.7	20.5	99.9	21.4	201	41.9	9070	0.321
AM4	RIM	AM4 RIM	190503	190503_169_LC492	LC492	30	10	3.5	0.185	0.011	0.02652	0.00047	0.33293	0.0507	0.003	172	9.8	168.7	3	190	130	2.42	153000	116.3	<64	5.58	0.413	<4.2	305.3	445300	0.852	0.76	0.076	0.0087	15.22	0.027	0.392	1.01	0.298	6.1	1.931	23.72	9.16	48.2	10.87	110.4	25	11850	0.348
AM4	CORE	AM4 CORE	190503	190503_171_LC493	LC493	30	10	3.5	0.186	0.012	0.02628	0.00054	0.0049633	0.0515	0.0034	172	11	167.2	3.4	210	140	0.68	153000	190.5	<58	13.45	0.715	<3.9	964	443100	0.577	0.75	<0.068	0.0327	16.69	0.366	5.11	7.31	2.13	31.9	8.68	91.7	30.9	142.5	28.9	260	53.3	8750	0.205
AM4	RIM	AM4 RIM	190503	190503_172_LC494	LC494	30	10	3.5	0.215	0.027	0.02873	0.00095	0.14947	0.0542	0.0069	196	23	182.6	6	300	270	3.04	153000	110.6	<76	6.7	0.224	<5.2	201.9	450000	0.587	0.73	<0.094	<0.0057	12.25	0.0145	0.24	0.75	0.172	4.23	1.274	15.92	6.07	31.3	7.04	73.3	15.79	11250	0.229
AM4	CORE	AM4 CORE	190503	190503_173_LC495	LC495	30	10	3.5	0.181	0.017	0.02752	0.00055	0.026763	0.049	0.0047	171	15	175	3.4	80	190	0.81	153000	148.1	<63	11.91	0.534	<4.2	542.4	442600	0.472	0.736	<0.077	0.006	13.67	0.063	1.49	3.35	0.919	16.08	4.39	50.3	17.17	80.5	16.33	151.1	31.65	9560	0.182
AM4	RIM	AM4 RIM	190503	190503_174_LC496	LC496	30	10	3.5	0.169	0.025	0.0273	0.0011	0.042384	0.0451	0.0065	158	21	173.7	6.9	-70	280	3.29	153000	130	<72	8.2	0.286	<5.2	263.7	454000	0.577	0.7	<0.051	<0.0053	13.12	0.0252	0.37	0.85	0.363	5.42	1.695	22	8.13	41.3	9.37	94.9	20.18	10330	0.219
AM4	CORE	AM4 CORE	190503	190503_176_LC497	LC497	30	10	3.5	0.185	0.017	0.02764	0.00073	0.24733	0.0491	0.0049	171	14	175.7	4.6	90	200	2.13	153000	160	<64	12.4	0.884	<4.2	539	439700	0.544	0.83	0.024	0.0112	15.6	0.08	1.68	3.94	1.02	17.3	4.62	50.4	17.14	79.3	15.82	147.6	30.4	9780	0.189
AM4	RIM	AM4 RIM	190503	190503_177_LC498	LC498	30	10	3.5
AM4	CORE	AM4 CORE	190503	190503_178_LC499	LC499	30	10	3.5
AM4	RIM	AM4 RIM	190503	190503_179_LC500	LC500	30	10	3.5
AM4	CORE	AM4 CORE	190503	190503_186_LC501	LC501	30	10	3.5	0.193	0.016	0.02745	0.00056	0.14012	0.051	0.0043	178	14	174.6	3.5	170	170	6.4	153000	146.3	<67	11	0.274	<3.8	324.7	449600	0.561	0.73	<0.052	0.0055	12.36	0.0262	0.46	1.34	0.466	6.95	2.216	26.87	10.05	50.2	10.88	109.6	23.62	10030	0.224
AM4	RIM	AM4 RIM	190503	190503_187_LC502	LC502	30	10	3.5	0.19	0.015	0.02748	0.00055	0.014746	0.0513	0.0043	178	13	174.8	3.4	190	170	0.79	153000	132.1	<66	5.75	0.221	<4.1	354.4	436000	0.776	0.691	<0.065	0.0066	14.48	0.0161	0.42	1.18	0.355	6.99	2.282	28.88	10.71	56	12.71	127.9	29.05	11300	0.328
AM18 LHG	CORE	AM18 LHG CORE	190503	190503_188_LC503	LC503	30	10	3.5
AM18 LHG	RIM	AM18 LHG RIM	190503	190503_189_LC504	LC504	30	10	3.5	0.183	0.012	0.02643	0.00052	0.16518	0.0502	0.0034	170	10	168.1	3.3	170	140	<0.33	153000	48.3	<68	2.8	0.057	<4.6	203.1	443500	0.433	0.7	<0.052	<0.004	15.21	0.0186	0.36	0.88	0.359	3.99	1.25	15	5.77	31.7	7.69	82.5	20.68	10790	0.14
AM18 LHG	CORE	AM18 LHG CORE	190503	190503_191_LC505	LC505	30	10	3.5
AM18 LHG	RIM	AM18 LHG RIM	190503	190503_192_LC506	LC506	30	10	3.5
AM18 LHG	CORE	AM18 LHG CORE	190503	190503_193_LC507	LC507	30	10	3.5
AM18 LHG	RIM	AM18 LHG RIM	190503	190503_194_LC508	LC508	30	10	3.5	0.262	0.017	0.0323	0.00093	0.77741	0.0583	0.0029	235	14	204.9	5.8	490	120	4.9	153000	94.5	<66	6.5	2.26	<4.4	843	437200	0.557	1.7	0.069	0.452	43.3	1.04	9.1	6.7	3.1	21.8	5.27	59	21.7	115.4	25.9	276	69.4	9620	0.0711
AM18 LHG	CORE	AM18 LHG CORE	190503	190503_196_LC509	LC509	30	10	3.5	0.186	0.01	0.02716	0.00045	0.29159	0.0497	0.0026	172.9	8.6	172.7	2.8	180	100	111	153000	56.7	<75	3.77	0.165	7.4	387	434700	0.432	0.753	0.73	0.041	14	0.0716	1.26	2.09	0.872	9.1	2.48	29.7	11.47	60.3	13.76	145.7	35.34	10390	0.122
AM18 LHG	RIM	AM18 LHG RIM	190503	190503_197_LC510	LC510	30	10	3.5	0.1817	0.0093	0.02695	0.00041	0.16134	0.049	0.0025	169.1	8	171.4	2.6	130	110	0.44	153000	42.5	<72	2.55	0.059	<4.2	177.3	440800	0.361	0.648	<0.052	<0.0027	14.37	0.0254	0.44	0.83	0.447	3.83	1.056	12.35	4.9	27.49	6.4	72.5	19.4	10590	0.074
AM18 LHG	CORE	AM18 LHG CORE	190503	190503_198_LC511	LC511	30	10	3.5	0.183	0.013	0.02709	0.0005	0.21137	0.0494	0.0035	170	11	172.3	3.1	120	140	0.57	153000	118.7	<57	5.22	0.196	<4.1	400	441400	0.822	0.723	<0.068	<0.0041	17.33	0.0285	0.5	1.45	0.449	7.55	2.57	31.9	12.26	63.3	14.3	140	31.1	10860	0.288
AM18 LHG	RIM	AM18 LHG RIM	190503	190503_199_LC512	LC512	30	10	3.5	0.1836	0.0094	0.02674	0.00053	0.17741	0.0498	0.0026	170.8	8.1	170.1	3.3	160	110	0.73	153000	44.1	<69	2.82	0.07	<4.2	193.2	443000	0.345	0.74	<0.048	0.0041	12.34	0.0218	0.203	0.51	0.351	3.27	0.955	12.47	5.2	30.3	7.47	90.7	26.5	10750	0.073
AM18 LHG	CORE	AM18 LHG CORE	190503	190503_201_LC513	LC513	30	10	3.5	0.181	0.015	0.02699	0.00061	0.0836	0.0487	0.0042	168	13	171.7	3.8	90	170	104	153000	79	<82	5.15	0.44	<5.3	522	435200	0.486	0.73	0.72	0.032	16.1	0.077	1.68	2.97	0.93	12.7	3.48	42.1	15.55	78.7	16.96	175	40.9	10470	0.173
AM18 LHG	RIM	AM18 LHG RIM	190503	190503_202_LC514	LC514	30	10	3.5	0.1785	0.0077	0.0268	0.00047	0.15668	0.049	0.0023	166.4	6.7	170.5	2.9	126	98	0.71	153000	47.4	<60	2.46	0.067	<4.4	216.7	431300	0.384	0.61	<0.064	0.0211	18.1	0.0305	0.47	0.9	0.442	4.53	1.26	15.14	5.94	32.5	7.67	85.2	22.95	11110	0.073
AM18 LHG	CORE	AM18 LHG CORE	190503	190503_203_LC515	LC515	30	10	3.5	0.198	0.018	0.0284	0.00073	0.031613	0.0507	0.0047	182	15	180.5	4.6	180	190	0.42	153000	155	<75	4.85	0.264	<4.7	500	459000	0.523	0.72	<0.056	0.29	16.2	0.149	1.74	2.46	0.86	12	3.44	39.4	14.4	73.5	16.5	161	36.4	11050	0.195
AM18 LHG	RIM	AM18 LHG RIM	190503	190503_204_LC516	LC516	30	10	3.5	0.223	0.02	0.0288	0.001	0.67085	0.0557	0.0038	204	16	183.2	6.4	410	150	17.4	153000	58.8	<71	3.54	0.52	10.8	338	452000	0.603	0.91	1.07	0.42	21.1	0.28	1.93	2.08	1.27	7.5	2.23	25.3	9.97	52.8	12.12	125	30.8	11370	0.241
AM18 LHG	CORE	AM18 LHG CORE	190503	190503_206_LC517	LC517	30	10	3.5	0.19	0.011	0.02716	0.00042	0.11089	0.051	0.0032	176.4	9.7	172.8	2.6	200	130	1.28	153000	103	<64	4.29	0.21	<4.2	673	439200	0.641	0.77	<0.047	0.0229	21.27	0.134	2.05	4.11	1.35	17.51	4.92	55.7	20.5	102	22.42	224.2	50.2	10340	0.218
AM18 LHG	RIM	AM18 LHG RIM	190503	190503_207_LC518	LC518	30	10	3.5	0.187	0.012	0.02815	0.00057	0.27098	0.0483	0.003	174	10	179	3.6	90	130	0.8	153000	34.5	<52	2.16	0.053	<3.9	105.5	455000	0.241	0.7	<0.062	<0.0039	8.5	0.0072	0.203	0.374	0.201	1.64	0.537	6.91	2.82	16.24	4.24	49.7	13.66	11280	0.058
AM18 LHG	CORE	AM18 LHG CORE	190503	190503_208_LC519	LC519	30	10	3.5
AM18 LHG	RIM	AM18 LHG RIM	190503	190503_209_LC520	LC520	30	10	3.5	0.193	0.011	0.02782	0.00049	0.034321	0.0507	0.003	179	9.2	176.9	3.1	190	120	0.72	153000	37.4	<66	2.2	<0.049	<3.9	154.5	435400	0.3	0.73	<0.052	<0.0042	10.09	0.0128	0.312	0.483	0.286	2.75	0.789	9.96	4.13	24.04	5.94	68.8	19.57	10610	0.066
AM18 LHG	CORE	AM18 LHG CORE	190503	190503_216_LC521	LC521	30	10	3.5	0.184	0.017	0.02971	0.00091	0.35147	0.0468	0.0047	177	18	188.7	5.7	20	200	3.1	153000	120	<100	8.24	0.431	<6.5	458	415100	0.52	0.65	<0.14	0.0112	13.73	0.06	1.32	2.42	0.62	11.5	3.28	37.7	13.8	69.3	15.1	138	29.3	10040	0.175
AM18 LHG	RIM	AM18 LHG RIM	190503	190503_217_LC522	LC522	30	10	3.5	0.188	0.011	0.02734	0.00045	0.11405	0.0501	0.0029	174.8	9.2	173.9	2.8	170	120	<0.34	153000	51.9	<60	2.59	0.077	<4.3	209.4	436800	0.43	0.65	<0.045	<0.0036	13.6	0.0196	0.32	0.71	0.304	4.07	1.22	14.98	6.01	33.3	8.22	89.2	22.26	10840	0.129
AM18 LHG	CORE	AM18 LHG CORE	190503	190503_218_LC523	LC523	30	10	3.5
AM18 LHG	RIM	AM18 LHG RIM	190503	190503_219_LC524	LC524	30	10	3.5	0.206	0.015	0.02818	0.00073	0.60651	0.0535	0.0049	190	13	179.1	4.6	310	200	6.6	153000	70.3	<73	4.05	0.148	16.8	545	474000	0.537	0.72	<0.1	0.095	18.64	0.152	1.82	3.26	1.31	12.4	3.54	41.4	16.3	82.5	19.72	203.8	47.9	10640	0.161
AM18 LHG	CORE	AM18 LHG CORE	190503	190503_221_LC525	LC525	30	10	3.5	0.225	0.039	0.0279	0.0016	0.32613	0.0591	0.0094	204	32	177	10	480	340	3.3	153000	63	<97	4.22	1.15	<6.1	227	466000	0.457	1.31	<0.072	0.041	12.9	0.0254	0.4	0.88	0.335	4.79	1.37	17.9	6.84	35	8	88	19.5	11150	0.134
AM18 LHG	RIM	AM18 LHG RIM	190503	190503_222_LC526	LC526	30	10	3.5	0.609	0.078	0.034	0.0013	0.8741	0.125	0.011	467	46	215.6	8.1	1900	170	1180	153000	40.7	176	8.9	2.06	1210	159.4	413700	0.375	0.98	8.4	0.458	14.05	0.438	3.95	1.71	1.253	4.12	0.917	10.74	4.18	23.5	5.64	64	17.5	10260	0.073
AM18 LHG	CORE	AM18 LHG CORE	190503	190503_223_LC527	LC527	30	10	3.5
AM18 LHG	RIM	AM18 LHG RIM	190503	190503_224_LC528	LC528	30	10	3.5	0.1811	0.0097	0.02772	0.00063	0.048518	0.0476	0.0026	168.7	8.4	176.3	3.9	70	110	2.98	153000	39.1	<90	1.7	0.221	12.7	124.7	413600	0.267	0.84	0.155	0.032	11.17	0.0296	0.45	0.43	0.299	2.21	0.587	8.05	3.19	18.98	4.78	56.4	16.29	11330	0.057
AM18 LHG	CORE	AM18 LHG CORE	190503	190503_226_LC529	LC529	30	10	3.5
AM18 LHG	RIM	AM18 LHG RIM	190503	190503_227_LC530	LC530	30	10	3.5	0.195	0.012	0.02926	0.00055	0.096781	0.0483	0.003	180	10	185.9	3.5	100	130	0.76	153000	59.6	<67	3.2	0.067	<4.5	227.2	457000	0.442	0.67	<0.078	<0.0033	17.39	0.0327	0.7	1.12	0.499	5.09	1.45	16.45	6.23	34.2	7.86	87.2	22.18	10780	0.079
AM18 LHG	CORE	AM18 LHG CORE	190503	190503_228_LC531	LC531	30	10	3.5	0.227	0.017	0.03118	0.00076	0.17157	0.0531	0.0039	207	14	197.9	4.7	280	160	1.16	153000	70	<62	3.88	0.435	<4.8	391	434000	0.556	0.663	<0.04	0.0437	16.1	0.049	0.99	2.08	0.747	8.73	2.4	29.8	11.37	62.2	14.09	146.9	35.7	9830	0.153
AM18 LHG	RIM	AM18 LHG RIM	190503	190503_229_LC532	LC532	30	10	3.5	0.191	0.013	0.02734	0.00047	0.054246	0.0507	0.0037	177	11	173.9	3	230	170	0.48	153000	43	<67	2.3	<0.048	<4.6	139.2	448000	0.279	0.72	<0.016	<0.0047	9.8	0.0109	0.37	0.45	0.244	2.97	0.76	9.06	3.8	21.32	5.22	59	16.05	10900	0.059
AM18 LHG	CORE	AM18 LHG CORE	190503	190503_231_LC533	LC533	30	10	3.5	0.194	0.017	0.02793	0.00054	0.0079801	0.0511	0.0047	179	15	177.6	3.4	160	180	1.74	153000	112.5	<58	6.06	0.156	<4.3	310.8	437300	0.529	0.73	0.068	0.0076	14.89	0.0209	0.449	1.42	0.406	6.59	2.026	24.94	9.43	48.9	10.48	106.3	23.22	10110	0.193
AM18 LHG	RIM	AM18 LHG RIM	190503	190503_232_LC534	LC534	30	10	3.5	0.191	0.011	0.02857	0.00051	0.034827	0.0487	0.003	177.1	9.3	181.6	3.2	110	130	24.3	153000	55	<66	3.25	0.081	<4.4	222.5	437700	0.396	0.78	0.099	0.0096	15.1	0.0212	0.37	0.88	0.428	4.45	1.305	16.01	6.45	34.9	8.41	90.2	22.2	10720	0.118
AM18 LHG	CORE	AM18 LHG CORE	190503	190503_233_LC535	LC535	30	10	3.5
AM18 LHG	RIM	AM18 LHG RIM	190503	190503_234_LC536	LC536	30	10	3.5	0.1858	0.0093	0.02773	0.00042	0.25394	0.0487	0.0024	172.6	8	176.3	2.6	110	100	<0.31	153000	67.2	<60	3.51	0.085	<4.1	321	435600	0.491	0.71	<0.053	0.0079	19	0.0403	0.63	1.38	0.557	6.24	1.87	23.8	9.39	51.1	11.78	124.5	31.1	10370	0.13
AM18 LHG	CORE	AM18 LHG CORE	190503	190503_236_LC537	LC537	30	10	3.5	0.177	0.011	0.02711	0.00046	0.31836	0.0473	0.0029	164.7	9.9	172.4	2.9	50	130	0.67	153000	54.8	<65	2.92	0.06	<4.6	215.9	435300	0.351	0.687	<0.065	0.0043	11.08	0.0232	0.394	0.8	0.348	3.51	1.118	14.33	5.92	33.5	8.26	94.2	25.51	10400	0.095
AM18 LHG	RIM	AM18 LHG RIM	190503	190503_237_LC538	LC538	30	10	3.5	0.198	0.0085	0.02739	0.00031	0.20092	0.0528	0.0023	183	7.2	174.2	1.9	287	93	0.48	153000	53.1	<67	2.83	<0.048	<4	226.4	436300	0.391	0.667	<0.045	0.0035	15.47	0.0261	0.49	0.9	0.431	4.37	1.296	15.42	6.18	34.56	8.15	90	23.24	10150	0.096
AM18 LHG	CORE	AM18 LHG CORE	190503	190503_238_LC539	LC539	30	10	3.5	0.193	0.013	0.02653	0.00042	0.11906	0.053	0.0036	179	11	168.8	2.6	290	140	5.86	153000	244	129	5	0.75	8.3	2100	419800	1.56	0.78	<0.13	0.52	68.9	0.653	10.3	16.4	4.75	66.2	17.97	197.1	68.5	315	62.8	561	114.7	8920	0.43
AM18 LHG	RIM	AM18 LHG RIM	190503	190503_239_LC540	LC540	30	10	3.5	0.189	0.012	0.02761	0.00038	0.28778	0.0487	0.0026	175	10	175.5	2.4	150	120	163	153000	70.5	<69	5	0.084	4.4	283.2	453100	0.498	0.68	1.75	0.125	19.35	0.0421	0.72	1.16	0.564	6.03	1.687	20.84	8.08	44.9	10.49	108.9	26.79	10840	0.118
AM18 LHG	CORE	AM18 LHG CORE	190503	190503_246_LC541	LC541	30	10	3.5	0.184	0.012	0.02735	0.00038	0.079925	0.0491	0.0033	171	10	173.9	2.4	120	130	<0.33	153000	133.4	<61	6.56	0.231	<4.6	478	439700	0.748	0.62	<0.053	<0.0033	20.04	0.0381	1.06	1.97	0.667	10.5	3.23	39.1	14.68	73.1	16.06	154.9	33.6	10040	0.256
AM18 LHG	RIM	AM18 LHG RIM	190503	190503_247_LC542	LC542	30	10	3.5	0.186	0.013	0.02604	0.00069	0.36852	0.0519	0.0033	173	11	165.7	4.3	250	140	5.2	153000	69	<82	2.35	0.081	41	162.9	430800	0.316	0.6	<0.1	0.17	11.51	0.06	0.45	0.69	0.275	3.23	0.903	10.82	4.41	24.5	5.92	64.9	17.49	10350	0.067
AM18 LHG	CORE	AM18 LHG CORE	190503	190503_248_LC543	LC543	30	10	3.5	0.184	0.011	0.02728	0.00049	0.088866	0.049	0.0031	171.3	9.8	173.5	3	120	130	14.8	153000	139	<61	4.42	0.228	28	665	438100	0.83	0.65	<0.051	0.041	25.4	0.105	1.79	2.97	1.46	15	4.41	52	19.6	101.6	22.4	224	51.2	10150	0.251
AM18 LHG	RIM	AM18 LHG RIM	190503	190503_249_LC544	LC544	30	10	3.5
AM18 LHG	CORE	AM18 LHG CORE	190503	190503_251_LC545	LC545	30	10	3.5	0.197	0.016	0.02886	0.00096	0.085613	0.0499	0.0045	182	14	183.4	6	170	190	<0.37	153000	188.6	<64	10.18	0.333	<4.6	834	479000	0.978	0.82	<0.072	0.0086	22.55	0.117	2.03	4.16	1.34	19.3	5.52	67	25.1	126.9	27.2	267	57.5	9610	0.303
AM18 LHG	RIM	AM18 LHG RIM	190503	190503_252_LC546	LC546	30	10	3.5	0.206	0.011	0.02784	0.00052	0.31805	0.0538	0.0027	189.7	9.3	177	3.3	330	120	1.63	153000	67.6	<85	2.67	0.332	<5	228	423600	0.485	1.23	<0.061	0.056	18.57	0.0419	0.68	1.01	0.383	4.36	1.249	15.58	6.17	34.8	8.48	94.3	24.09	10460	0.136
AM18 LHG	CORE	AM18 LHG CORE	190503	190503_253_LC547	LC547	30	10	3.5	0.19	0.016	0.02885	0.00051	0.10874	0.0482	0.0042	176	13	183.3	3.2	60	170	2	153000	169	99	4.31	0.141	<4	254	435300	0.488	0.65	<0.065	0.29	13.24	0.09	0.65	1.08	0.297	5.07	1.52	19.78	7.59	40.9	9.24	93.8	22.21	10820	0.179
AM18 LHG	RIM	AM18 LHG RIM	190503	190503_254_LC548	LC548	30	10	3.5	0.202	0.012	0.02843	0.00062	0.084933	0.0518	0.0032	186	11	180.7	3.9	280	150	<0.38	153000	46.5	<77	2.14	<0.056	<5.5	189.6	426600	0.31	0.71	<0.062	0.0081	11.49	0.0212	0.42	0.65	0.363	3.63	1.039	12.68	5.07	29.04	6.99	78.3	20.85	10270	0.067
AM18 LHG	CORE	AM18 LHG CORE	190503	190503_256_LC549	LC549	30	10	3.5	0.244	0.011	0.03004	0.00063	0.066653	0.0593	0.003	221.2	9	190.8	3.9	530	110	33.9	153000	321	221	5.3	2.93	126	1336	419600	2.88	2.1	2.53	0.314	14.8	0.14	1.94	4.47	0.785	25.6	8.76	115	44.2	224	46	429	93.8	8820	0.71
AM18 LHG	RIM	AM18 LHG RIM	190503	190503_257_LC550	LC550	30	10	3.5	0.216	0.017	0.02742	0.00054	0.17562	0.0572	0.0046	198	14	174.4	3.4	440	170	1.39	153000	59.7	<74	3.2	0.122	<4.6	279	448600	0.511	0.72	0.149	0.042	17.09	0.039	0.64	0.9	0.507	5.33	1.597	19.45	8.11	44.4	10.66	115	29.7	10670	0.134
AM18 LHG	CORE	AM18 LHG CORE	190503	190503_258_LC551	LC551	30	10	3.5	0.184	0.018	0.02837	0.00073	0.31859	0.047	0.0045	171	16	180.3	4.6	30	190	7.79	153000	224.7	<68	15.1	0.429	<4.5	439.7	451600	0.578	0.76	<0.063	0.0074	15.79	0.07	1.23	2.72	0.815	11.66	3.35	38.52	13.71	65.7	14.02	134.8	29.53	9150	0.193
AM18 LHG	RIM	AM18 LHG RIM	190503	190503_259_LC552	LC552	30	10	3.5	0.193	0.013	0.0274	0.00049	0.012214	0.0512	0.0035	179	11	174.3	3.1	220	150	<0.35	153000	56	<70	2.72	0.089	<4.3	252.4	448600	0.409	0.75	<0.046	0.0055	16.34	0.0369	0.51	1.05	0.545	5.41	1.474	18.58	7.05	38.2	8.69	97.2	24.77	10580	0.098
AM18 LHG	CORE	AM18 LHG CORE	190503	190503_261_LC553	LC553	30	10	3.5
AM18 LHG	RIM	AM18 LHG RIM	190503	190503_262_LC554	LC554	30	10	3.5	0.218	0.013	0.02791	0.00039	0.24835	0.0566	0.0034	199	11	177.4	2.4	420	130	740	153000	40.6	<69	2.83	0.058	4.9	194.7	424100	0.388	0.67	0.139	0.0142	14.67	0.0216	0.405	0.742	0.331	3.73	1.135	12.74	5.42	29.27	7.13	76.4	19.23	10050	0.1
AM18 LHG	CORE	AM18 LHG CORE	190503	190503_263_LC555	LC555	30	10	3.5	0.225	0.044	0.0287	0.0013	0.28041	0.058	0.013	204	36	182.2	8.3	380	440	1.26	153000	126	<82	7.45	0.283	<6	380.1	482000	0.657	0.6	<0.086	<0.0061	14.55	0.023	0.39	1.47	0.47	7.99	2.48	30.4	11.45	58.8	12.5	123.9	27.4	11080	0.227
AM18 LHG	RIM	AM18 LHG RIM	190503	190503_264_LC556	LC556	30	10	3.5	0.19	0.014	0.02818	0.0006	0.13329	0.0492	0.0036	176	12	179.2	3.8	120	150	3	153000	43.2	<77	2.8	0.072	<5.1	154.9	412300	0.294	0.73	<0.069	0.0136	10.6	0.0241	0.25	0.57	0.353	3	0.861	10.8	4.45	24	5.58	63.3	16.33	9890	0.064
AM18 LHG	CORE	AM18 LHG CORE	190503	190503_266_LC557	LC557	30	10	3.5	0.1818	0.0046	0.0262	0.00023	0.54538	0.0502	0.0012	169.5	4	166.7	1.4	203	56	146	153000	519	<63	6.24	3.83	42.7	5470	429700	7.45	0.74	0.86	0.104	134	0.697	12	26.6	7.57	153	45	513	177	825	163	1458	293	9370	1.291
AM18 LHG	RIM	AM18 LHG RIM	190503	190503_267_LC558	LC558	30	10	3.5	0.177	0.014	0.02681	0.00051	0.12005	0.0479	0.0038	165	13	170.5	3.2	80	170	0.47	153000	61.8	<67	3.04	0.105	<5	233.8	463600	0.377	0.87	<0.071	<0.0043	16.45	0.0284	0.6	1.03	0.417	4.72	1.44	16.85	6.64	35.4	8.66	93	22.94	11210	0.123
AM18 LHG	CORE	AM18 LHG CORE	190503	190503_268_LC559	LC559	30	10	3.5	0.331	0.027	0.03857	0.00066	0.32147	0.062	0.0046	288	20	244	4.1	610	160	370	153000	410	190	29.2	0.84	103	1066	425700	0.783	0.641	9.3	0.99	11.5	0.243	3.04	5.02	0.888	25.38	7.83	95.1	34.1	161.6	31.45	276.3	55.5	8860	0.41
AM18 LHG	RIM	AM18 LHG RIM	190503	190503_269_LC560	LC560	30	10	3.5	0.237	0.012	0.03217	0.00067	0.071564	0.0538	0.0029	215.3	9.9	204.1	4.2	320	120	0.41	153000	89.4	<58	3.23	0.089	<3.6	233	432000	0.542	0.628	<0.044	<0.0032	10.02	0.0151	0.292	0.84	0.239	3.8	1.355	17.2	6.81	36.1	8.06	81.2	19.19	11230	0.201
AM18 LHG	CORE	AM18 LHG CORE	190503	190503_276_LC561	LC561	30	10	3.5	0.188	0.011	0.02784	0.00054	0.035778	0.0493	0.003	174.6	9.2	177	3.4	130	120	3	153000	242	85	9.59	0.424	<4.5	1016	433600	0.92	0.7	<0.071	0.66	26.9	0.397	4.51	8.05	2.06	34.3	9.07	97.8	32.2	150	29.3	266	54.4	9850	0.28
AM18 LHG	RIM	AM18 LHG RIM	190503	190503_277_LC562	LC562	30	10	3.5	0.189	0.015	0.02742	0.00091	0.28163	0.0502	0.004	176	13	174.4	5.7	180	170	<0.43	153000	135	<87	7	0.297	<5.3	691	450000	1.067	0.71	<0.084	<0.0063	28.5	0.09	1.47	3.44	0.92	17.21	4.83	57.5	20.6	102.3	21.9	214	46.3	10940	0.317
AM18 LHG	CORE	AM18 LHG CORE	190503	190503_278_LC563	LC563	30	10	3.5	0.199	0.015	0.02826	0.0005	0.077478	0.0511	0.0038	183	13	179.7	3.1	220	160	4.5	153000	110.5	<59	5.89	0.209	<4.3	409.1	433300	0.614	0.659	<0.06	0.038	14.99	0.042	0.73	1.82	0.562	9.21	2.789	33.66	12.38	64	14.01	138.8	30.92	9800	0.219
AM18 LHG	RIM	AM18 LHG RIM	190503	190503_279_LC564	LC564	30	10	3.5	0.192	0.011	0.02777	0.00042	0.16712	0.0502	0.0028	177.4	9.3	176.6	2.6	170	120	<0.32	153000	49.7	<61	2.59	0.059	<4.1	197.3	430500	0.313	0.603	<0.053	0.0107	13.77	0.0254	0.48	0.82	0.392	3.74	1.134	13.62	5.58	30.3	7.34	81.6	20.72	10360	0.08
AM18 LHG	CORE	AM18 LHG CORE	190503	190503_281_LC565	LC565	30	10	3.5	0.216	0.025	0.02784	0.0008	0.2597	0.0569	0.0073	197	21	177	5	380	260	<0.38	153000	112.2	<67	7.12	0.237	<4.8	352.2	442200	0.534	0.73	<0.075	<0.0035	14.51	0.033	0.6	1.41	0.486	7.55	2.406	29.54	10.75	56.4	11.77	117.3	25.74	10070	0.175
AM18 LHG	RIM	AM18 LHG RIM	190503	190503_282_LC566	LC566	30	10	3.5	0.1833	0.0073	0.02681	0.00031	0.21028	0.0497	0.0019	170.7	6.3	170.6	1.9	163	83	26.4	153000	58.8	<63	8.6	0.193	39	222.4	430800	0.416	0.63	0.26	0.0209	17.21	0.0259	0.43	0.84	0.459	4.37	1.241	14.82	5.99	34.15	8.25	93.9	26.06	10320	0.09
AM18 LHG	CORE	AM18 LHG CORE	190503	190503_283_LC567	LC567	30	10	3.5	0.209	0.017	0.028	0.00063	0.0084758	0.0531	0.004	192	14	178	3.9	330	180	3	153000	137.3	<63	7.44	0.75	<3.9	918	462000	0.724	0.69	<0.066	0.036	23.1	0.192	2.83	5.63	1.66	26.8	7.34	83.6	29.1	135	27.3	256	52.9	10020	0.242
AM18 LHG	CORE	AM18 LHG CORE	190503	190503_284_LC568	LC568	30	10	3.5	0.198	0.013	0.02801	0.00042	0.12072	0.0516	0.0036	183	11	178.1	2.7	220	140	139	153000	68.5	<74	4.35	0.116	7.9	283.7	441200	0.54	0.68	1.05	0.075	19.12	0.0406	0.7	1.25	0.49	5.67	1.727	21.44	8.32	43.6	10.05	103	24.87	10330	0.203
AM18 LHG	CORE	AM18 LHG CORE	190503	190503_286_LC569	LC569	30	10	3.5	0.28	0.018	0.0375	0.0011	0.38343	0.0553	0.0037	254	17	237.2	6.7	380	140	14.9	153000	326	<71	9.26	0.89	21.2	2002	452000	1.3	0.65	0.32	0.052	15.14	0.311	4.61	9.29	1.58	47.6	14.56	180.8	66	307	61	533	105.5	8950	0.442
AM18 LHG	RIM	AM18 LHG RIM	190503	190503_287_LC570	LC570	30	10	3.5	0.272	0.011	0.03872	0.00056	0.045404	0.0511	0.0023	243.4	9.1	244.9	3.5	218	94	0.42	153000	459	<64	11.6	0.541	<3.8	1321	441300	1.701	0.613	<0.063	0.0174	20.17	0.124	2.08	4.53	0.683	24.9	8.4	109.1	41.9	211.3	43.1	398	82.6	9360	0.751
AM18 LHG	CORE	AM18 LHG CORE	190503	190503_288_LC571	LC571	30	10	3.5	0.372	0.031	0.0361	0.0011	0.30144	0.0748	0.0059	320	22	228.6	6.9	1020	150	539	153000	96.6	<79	6.29	1.08	780	358	431000	0.525	0.64	0.55	0.264	15.94	0.217	1.84	2.16	1	8.36	2.37	28.5	10.71	55.7	12.2	123.6	29.6	10240	0.181
AM18 LHG	RIM	AM18 LHG RIM	190503	190503_289_LC572	LC572	30	10	3.5
AM18 LHG	CORE	AM18 LHG CORE	190503	190503_291_LC573	LC573	30	10	3.5	0.61	0.14	0.0568	0.0095	0.94788	0.0659	0.0071	429	84	352	57	610	230	910	153000	139.1	80	8.43	0.64	4.7	467	413900	0.535	1.81	0.94	0.032	12.29	0.068	1.1	2.53	0.826	12.02	3.45	40.5	14.38	72.1	15.12	148.8	32.2	8470	0.198
AM18 LHG	RIM	AM18 LHG RIM	190503	190503_292_LC574	LC574	30	10	3.5	0.191	0.013	0.0277	0.00055	0.15268	0.0504	0.0039	177	11	176.1	3.4	210	170	0.34	153000	61.3	<64	2.63	0.111	<4.3	214.9	446100	0.406	0.77	<0.016	<0.0031	14.04	0.0146	0.33	0.92	0.351	4.56	1.311	16.54	6.32	33.37	7.62	80.1	19.63	11050	0.126
AM18 LHG	CORE	AM18 LHG CORE	190503	190503_293_LC575	LC575	30	10	3.5	0.206	0.019	0.02833	0.00053	0.1197	0.0528	0.0047	189	16	180.1	3.3	270	190	0.39	153000	157	140	5.11	0.232	<4.6	711	459600	0.515	0.78	<0.09	0.53	19.4	0.28	3.23	5.05	1.4	19.7	5.57	62.1	22.3	109.4	22.5	216.9	46.9	10530	0.149
AM18 LHG	RIM	AM18 LHG RIM	190503	190503_294_LC576	LC576	30	10	3.5	0.208	0.018	0.02695	0.00052	0.55984	0.0557	0.0042	191	15	171.4	3.3	380	160	810	153000	48	<66	8.5	0.137	52	164.1	433600	0.349	0.63	0.82	0.265	12.67	0.0287	0.41	0.57	0.309	3.34	0.985	11.39	4.72	25.2	6.03	67.1	17.74	10630	0.08
AM18 LHG	CORE	AM18 LHG CORE	190503	190503_296_LC577	LC577	30	10	3.5	0.1883	0.0098	0.02828	0.00042	0.0376	0.0485	0.0026	174.7	8.4	179.8	2.6	110	110	0.91	153000	188	<59	5.04	0.65	<4.1	1090	428800	0.766	0.664	<0.084	0.0178	23.31	0.222	3.79	6.69	1.94	30.2	8.74	98	34.2	163	33.2	316	64.4	9130	0.274
AM18 LHG	RIM	AM18 LHG RIM	190503	190503_297_LC578	LC578	30	10	3.5	0.192	0.012	0.02844	0.0005	0.25885	0.0496	0.0031	177	10	180.7	3.1	140	130	<0.32	153000	128.2	<60	5.79	0.21	<4.1	463.5	429000	0.773	0.7	<0.064	<0.003	22.92	0.0527	1.11	2.4	0.663	10.93	3.26	38.14	14.18	72.4	15.43	150.7	33.06	10050	0.27
AM18 LHG	CORE	AM18 LHG CORE	190503	190503_298_LC579	LC579	30	10	3.5	0.187	0.018	0.02763	0.0008	0.26042	0.0492	0.0046	174	15	175.7	5	130	190	1.93	153000	140	<59	6.24	0.462	<4.4	634	467000	0.638	1.18	<0.048	0.025	15.3	0.102	1.93	3.62	1.152	15.83	4.49	55.5	19.86	99.8	21.07	201.2	44.5	11090	0.243
AM18 LHG	RIM	AM18 LHG RIM	190503	190503_299_LC580	LC580	30	10	3.5	0.177	0.0097	0.02675	0.00045	0.28641	0.048	0.0025	165.1	8.4	170.2	2.8	90	110	29	153000	165	100	7.39	0.418	5.6	1028	458100	1.05	0.6	0.42	0.64	20.8	0.34	3.8	6.8	2.56	28.2	8.2	95	33.4	160	33.9	324	68.4	10180	0.275
AM18 LHG	CORE	AM18 LHG CORE	190503	190503_306_LC581	LC581	30	10	3.5	0.322	0.046	0.0294	0.0013	0.23311	0.079	0.011	280	35	187.1	7.8	1070	290	2260	153000	132	<72	30	1.45	320	540	431000	2.06	0.68	9.6	0.38	12.7	0.075	1.13	2.26	0.633	11	3.4	42.9	17.3	92	20.6	207	47	10000	0.65
AM18 LHG	RIM	AM18 LHG RIM	190503	190503_307_LC582	LC582	30	10	3.5	0.1753	0.009	0.02663	0.00041	0.00102	0.048	0.0026	163.6	7.8	169.4	2.6	80	110	0.53	153000	36.7	<59	2.08	0.048	<4.4	114.9	454300	0.263	0.617	<0.051	0.0046	8.86	0.0111	0.093	0.328	0.189	1.93	0.578	7.58	3.195	18.01	4.53	51.4	14.21	11530	0.074
AM18 LHG	CORE	AM18 LHG CORE	190503	190503_308_LC583	LC583	30	10	3.5	0.177	0.016	0.02691	0.00075	0.39401	0.0478	0.0038	165	14	171.2	4.7	80	170	<0.38	153000	104	<81	4.22	0.132	<4.9	663	524000	0.93	0.89	<0.078	0.0078	28.6	0.091	1.54	2.86	0.94	13.4	4.07	49.6	19.2	103	24.1	257	59.3	11650	0.284
AM18 LHG	RIM	AM18 LHG RIM	190503	190503_309_LC584	LC584	30	10	3.5	0.173	0.01	0.02599	0.00043	0.17426	0.0489	0.0031	161.9	9	165.4	2.7	120	130	0.45	153000	57.9	<62	3.33	0.087	<4.4	300.3	465400	0.431	0.591	<0.059	0.0082	18.07	0.038	0.69	1.11	0.577	6.23	1.71	21.29	8.55	46.3	10.97	117.7	30.07	10890	0.123
AM18 LHG	CORE	AM18 LHG CORE	190503	190503_311_LC585	LC585	30	10	3.5	0.195	0.013	0.0268	0.00049	0.19757	0.0529	0.0034	180	11	170.5	3.1	280	140	0.93	153000	106.8	<73	4.48	0.196	<4.3	442	447300	0.578	0.64	0.061	0.004	16.14	0.0434	0.89	2.14	0.681	10.34	3.01	36.7	13.22	69.3	14.98	147.5	32.66	10850	0.227
AM18 LHG	RIM	AM18 LHG RIM	190503	190503_312_LC586	LC586	30	10	3.5	0.187	0.011	0.02749	0.00033	0.12535	0.0494	0.0028	173.1	9.2	174.8	2.1	140	120	0.67	153000	40.1	<61	2.71	<0.041	<4.1	176.4	456900	0.383	0.711	<0.067	<0.0032	14.85	0.0268	0.383	0.9	0.438	4.19	1.101	13.13	4.96	27	6.24	68.6	18.14	11360	0.072
AM18 LHG	CORE	AM18 LHG CORE	190503	190503_313_LC587	LC587	30	10	3.5	0.22	0.012	0.02707	0.00063	0.035253	0.0594	0.0034	201.7	9.6	172.2	3.9	540	130	2040	153000	79.3	131	19.7	0.309	91	730	432000	0.904	0.76	8	0.504	27.54	0.179	2.58	4.14	1.11	18.11	5.31	61.8	22.65	111.8	24.9	249	53.1	10780	0.264
AM18 LHG	RIM	AM18 LHG RIM	190503	190503_314_LC588	LC588	30	10	3.5	0.176	0.01	0.02761	0.00052	0.22909	0.0466	0.0032	164.2	9	175.6	3.3	50	150	0.8	153000	70.7	<62	4	0.112	<4	199.2	469100	0.404	0.7	<0.054	<0.0024	12.13	0.0148	0.27	0.74	0.258	3.53	1.142	15.4	5.78	31.3	7.17	75.5	18.33	11500	0.147
AM18 LHG	CORE	AM18 LHG CORE	190503	190503_316_LC589	LC589	30	10	3.5	0.1791	0.0078	0.02566	0.00035	0.055206	0.0509	0.0023	167.1	6.7	163.3	2.2	215	98	528	153000	180	75	4.88	0.254	<5.2	2350	438000	1.79	0.57	0.35	0.093	94	0.87	14.9	21.9	8.54	80.2	20	210	70.5	334	67.7	625	131.4	8240	0.342
AM18 LHG	RIM	AM18 LHG RIM	190503	190503_317_LC590	LC590	30	10	3.5	0.202	0.0095	0.02624	0.00042	0.10268	0.0561	0.0027	186.4	7.9	167	2.7	410	100	620	153000	228	270	7.85	0.389	45	790	450700	1.08	0.87	0.47	0.99	51.3	0.33	3.68	5.48	2.45	22.4	5.81	63.7	22.8	113	25	249	56.1	9500	0.272
AM22	CORE	AM22 CORE	190503	190503_318_LC591	LC591	30	10	3.5	0.1782	0.0087	0.02552	0.00074	0.53222	0.0507	0.0021	166.4	7.4	162.4	4.6	221	97	2.96	153000	124	<87	16	0.74	<5.7	386	502000	0.867	5.55	0.082	0.023	16.42	0.08	0.97	1.79	0.413	8.15	2.58	31.5	11.63	59.5	13.36	132.5	29.3	14070	0.69
AM22	RIM	AM22 RIM	190503	190503_319_LC592	LC592	30	10	3.5	0.188	0.018	0.02594	0.0007	0.057652	0.053	0.0052	174	15	165.1	4.4	260	200	5.7	153000	60.7	<84	3.76	0.182	6	216.6	435600	0.449	0.87	0.34	0.025	14.25	0.0196	0.6	1.06	0.298	4.05	1.294	15.75	5.96	34.1	7.71	81.6	19.96	10680	0.153
AM22	CORE	AM22 CORE	190503	190503_321_LC593	LC593	30	10	3.5	0.254	0.031	0.02685	0.00047	0.67026	0.0658	0.0066	226	24	170.8	2.9	680	190	171	153000	162.2	<59	7.31	2.09	11	1124	446800	1.38	4.7	0.81	0.114	40.2	0.222	3.97	7.52	1.99	33	8.98	104	36.3	177	36.1	346	71.5	10500	0.429
AM22	RIM	AM22 RIM	190503	190503_322_LC594	LC594	30	10	3.5	0.172	0.012	0.02656	0.00055	0.094797	0.0474	0.0035	161	10	169	3.4	50	150	<0.36	153000	79	<66	4.4	0.155	<4.9	327	446800	0.649	0.595	<0.044	0.0054	19.24	0.0242	0.54	1.51	0.424	6.76	2.095	25.77	9.75	51.89	11.78	118.6	26.81	11190	0.235
AM22	CORE	AM22 CORE	190503	190503_323_LC595	LC595	30	10	3.5	0.181	0.02	0.02644	0.00065	0.014013	0.05	0.0055	168	17	168.3	4.1	150	230	1.29	153000	218	<75	8.63	0.228	<5.6	617	443400	1.026	0.71	<0.059	<0.0073	18.07	0.0458	0.92	2.52	0.81	13.14	3.87	48.5	18.61	98.2	21.26	208.9	47.2	9950	0.344
AM22	RIM	AM22 RIM	190503	190503_324_LC596	LC596	30	10	3.5	0.183	0.01	0.02643	0.00045	0.07395	0.0496	0.003	170	8.8	168.1	2.8	150	130	0.58	153000	58.9	<62	3.27	0.061	<3.9	234	449900	0.393	0.75	<0.073	0.036	14.1	0.038	0.51	0.98	0.461	4.6	1.296	16.7	6.62	36.8	8.81	96.5	24.21	10690	0.102
AM22	CORE	AM22 CORE	190503	190503_326_LC597	LC597	30	10	3.5
AM22	RIM	AM22 RIM	190503	190503_327_LC598	LC598	30	10	3.5	0.1796	0.0091	0.02618	0.00035	0.10796	0.0503	0.0028	167.3	7.9	166.6	2.2	180	120	<0.3	153000	63.6	<54	3.31	0.067	<3.7	257.1	452900	0.441	0.62	<0.057	<0.0037	17.39	0.0298	0.62	1.08	0.457	5.47	1.585	19.27	7.52	40.2	9.37	100.1	24.24	10910	0.129
AM22	CORE	AM22 CORE	190503	190503_328_LC599	LC599	30	10	3.5	0.1818	0.0092	0.02563	0.00037	0.18819	0.0515	0.0024	170.8	8.4	163.1	2.3	260	110	1	153000	93	<58	5.73	0.157	4.2	457	464600	0.354	0.7	<0.068	0.0103	9.36	0.089	1.53	3.06	1.05	12.9	3.49	40	14.2	70	14.8	143	31.6	10420	0.099
AM22	RIM	AM22 RIM	190503	190503_329_LC600	LC600	30	10	3.5	0.1728	0.0091	0.0259	0.00048	0.29382	0.0488	0.0024	161.4	7.9	164.8	3	120	110	1.4	153000	51.5	<57	2.64	0.121	<4	236	450700	0.468	0.74	<0.051	0.025	13.56	0.024	0.4	0.75	0.381	3.99	1.233	16.04	6.6	37.3	9.14	103.8	27.6	11650	0.13
AM22	CORE	AM22 CORE	190503	190503_336_LC601	LC601	30	10	3.5	0.176	0.012	0.02604	0.00056	0.48596	0.0488	0.0031	164	10	165.7	3.5	120	130	11.3	153000	106	<66	4.24	0.14	<4	740	470400	0.86	0.75	0.069	0.067	26.9	0.153	2.02	4.6	1.38	18.7	5.29	62	23	114	24.7	247	55.5	10890	0.218
AM22	RIM	AM22 RIM	190503	190503_337_LC602	LC602	30	10	3.5	0.179	0.011	0.02631	0.00043	0.15929	0.0497	0.0029	166.9	9	167.4	2.7	150	120	<0.31	153000	48.8	<61	2.85	0.064	<4.1	260.1	458500	0.413	0.71	<0.073	<0.0023	14.33	0.0241	0.43	0.89	0.41	4.64	1.488	17.89	7.54	41.6	10.04	109.8	28.5	10990	0.101
AM22	CORE	AM22 CORE	190503	190503_338_LC603	LC603	30	10	3.5
AM22	RIM	AM22 RIM	190503	190503_339_LC604	LC604	30	10	3.5	0.167	0.012	0.02521	0.00047	0.22963	0.0486	0.0038	157	10	160.5	3	100	160	25	153000	163	78	6.5	0.247	<4.5	521	445400	0.975	0.67	0.24	0.24	27.7	0.132	1.43	2.35	0.636	11.64	3.54	43.5	15.79	80.1	17.31	165.2	35.87	10780	0.338
AM22	CORE	AM22 CORE	190503	190503_341_LC605	LC605	30	10	3.5
AM22	RIM	AM22 RIM	190503	190503_342_LC606	LC606	30	10	3.5	0.175	0.011	0.02612	0.00055	0.20062	0.0488	0.0031	163.4	9.8	166.2	3.4	120	140	0.95	153000	117.8	<63	6.26	0.223	<4.4	412.9	465300	0.859	0.77	0.077	<0.0036	22.66	0.0324	0.73	1.88	0.515	9.72	2.849	33.94	12.71	63.4	13.9	135.3	29.14	11290	0.294
AM22	CORE	AM22 CORE	190503	190503_343_LC607	LC607	30	10	3.5	0.1722	0.0095	0.02531	0.00041	0.10418	0.0496	0.0028	160.9	8.3	161.1	2.6	150	120	0.69	153000	155	<63	6.41	0.547	<3.9	900	463500	1.26	0.7	<0.069	0.0078	34.7	0.119	2.45	4.62	1.304	22.6	6.67	77.1	27.8	135.3	27.8	263	54.8	10480	0.389
AM22	RIM	AM22 RIM	190503	190503_344_LC608	LC608	30	10	3.5
AM22	CORE	AM22 CORE	190503	190503_346_LC609	LC609	30	10	3.5
AM22	RIM	AM22 RIM	190503	190503_347_LC610	LC610	30	10	3.5
AM22	CORE	AM22 CORE	190503	190503_348_LC611	LC611	30	10	3.5	0.179	0.013	0.02748	0.00053	0.081457	0.0474	0.0033	166	11	174.8	3.3	50	140	1.49	153000	159.4	<59	7.4	0.277	<3.7	766	458400	0.527	0.64	<0.044	0.0044	16.86	0.117	2.3	4.88	1.43	21.7	6	67.1	23.6	114.9	23.4	226	47.1	10250	0.184
AM22	RIM	AM22 RIM	190503	190503_349_LC612	LC612	30	10	3.5	0.177	0.012	0.0269	0.00058	0.34294	0.0477	0.0031	165	11	171.1	3.6	70	140	<0.33	153000	71.5	<60	4.01	0.111	<4.1	305.3	470500	0.515	0.72	<0.016	<0.0044	19.65	0.0276	0.58	1.32	0.495	6.71	1.918	23.47	9	46.7	10.87	115.6	26.89	11120	0.161
AM22	CORE	AM22 CORE	190503	190503_351_LC613	LC613	30	10	3.5	0.211	0.034	0.02648	0.00078	0.46353	0.0573	0.0081	199	31	168.5	4.9	410	300	430	153000	173.8	<74	13.6	0.325	12	357	436200	0.611	0.67	2.6	0.108	12.33	0.072	0.96	1.92	0.568	9.17	2.71	31.7	11.22	55.3	11.62	112.8	24.97	9820	0.222
AM22	RIM	AM22 RIM	190503	190503_352_LC614	LC614	30	10	3.5	0.184	0.012	0.02758	0.00069	0.19015	0.0489	0.0037	172	10	175.3	4.3	120	160	3.55	153000	134.2	<67	8.15	0.26	<4.5	283.9	478200	0.773	0.64	<0.062	<0.0049	17.14	0.0216	0.5	1.15	0.39	6.01	1.864	22.74	8.39	43.3	9.84	99.6	22.4	11600	0.312
AM22	CORE	AM22 CORE	190503	190503_353_LC615	LC615	30	10	3.5	0.2	0.014	0.02659	0.00054	0.032857	0.0547	0.004	185	12	169.1	3.4	350	160	129	153000	193	<59	9.96	0.296	6.4	539	477000	0.955	0.77	0.76	0.15	17.84	0.083	1.07	2.32	0.657	11.46	3.66	43.8	16.36	84.8	18.57	185.7	41.1	11120	0.372
AM22	RIM	AM22 RIM	190503	190503_354_LC616	LC616	30	10	3.5	0.176	0.0086	0.02633	0.00042	0.22474	0.0487	0.0024	164.2	7.4	167.5	2.6	110	100	0.32	153000	85.7	<58	4.29	0.152	<4	371	452100	0.688	0.579	<0.069	<0.0035	19.18	0.032	0.62	1.4	0.52	7.37	2.219	28.37	10.77	57.4	13.07	136.1	32.15	11120	0.222
AM22	CORE	AM22 CORE	190503	190503_356_LC617	LC617	30	10	3.5	0.216	0.016	0.02805	0.00069	0.36427	0.0559	0.004	198	14	178.3	4.3	420	160	14.5	153000	65.4	<82	3.52	0.83	<5	573	472000	0.437	4.75	0.137	0.082	18.58	0.182	2.71	3.88	1.53	15.65	4.26	47.2	17.1	87	19.3	195	45.4	11030	0.152
AM22	RIM	AM22 RIM	190503	190503_357_LC618	LC618	30	10	3.5	0.175	0.012	0.02637	0.00096	0.41987	0.0485	0.003	163	10	167.8	6	110	130	0.68	153000	98.3	<68	6.64	0.52	<4.5	1057	457000	1.69	1.41	<0.076	0.0217	53.5	0.106	1.78	4.41	2.28	26.8	7.66	87.3	31.4	158.6	34.6	340	76.1	10030	0.283
AM22	CORE	AM22 CORE	190503	190503_358_LC619	LC619	30	10	3.5	0.235	0.027	0.02805	0.00075	0.13519	0.0612	0.0074	213	23	178.3	4.7	570	260	33	153000	201	<110	6.7	0.5	<7	834	429900	0.542	0.64	0.49	0.024	17.01	0.165	2.99	5.6	1.54	23.9	6.46	74.4	26.06	124.7	26.1	246.5	51.6	9570	0.21
AM22	RIM	AM22 RIM	190503	190503_359_LC620	LC620	30	10	3.5	0.173	0.013	0.02628	0.00047	0.1449	0.0481	0.0037	162	11	167.2	2.9	60	150	0.71	153000	117.1	<64	5.65	0.224	<3.7	385.3	454100	0.659	0.62	<0.068	<0.0035	18.51	0.0339	0.6	1.66	0.506	8.43	2.665	31.22	11.81	59.3	12.74	124.3	26.92	10610	0.234
AM22	CORE	AM22 CORE	190503	190503_366_LC621	LC621	30	10	3.5	0.188	0.024	0.02764	0.00061	0.16074	0.0493	0.0063	174	21	175.8	3.8	110	260	0.64	153000	559	163	7.8	0.329	<6.1	510	438300	0.5	0.66	<0.028	0.7	15.45	0.316	2.15	3.09	0.923	13.8	3.71	43.5	15.69	79	16.2	155.4	33.3	9450	0.199
AM22	RIM	AM22 RIM	190503	190503_367_LC622	LC622	30	10	3.5	0.178	0.013	0.02682	0.00063	0.020044	0.0486	0.0039	165	12	170.6	4	90	160	0.35	153000	136.3	<60	7.73	0.234	<4	421	454400	0.618	0.589	<0.052	<0.004	17.09	0.0477	0.85	2.14	0.634	9.65	2.821	35.06	12.67	65.1	14.15	138.2	30.24	10060	0.207
AM22	CORE	AM22 CORE	190503	190503_368_LC623	LC623	30	10	3.5
AM22	RIM	AM22 RIM	190503	190503_369_LC624	LC624	30	10	3.5	0.169	0.011	0.02654	0.0005	0.21869	0.0464	0.003	158.4	9.8	168.8	3.1	20	130	<0.34	153000	71.6	<59	3.8	0.092	<4.3	311.6	461400	0.501	0.61	<0.065	0.0043	16.72	0.0228	0.7	1.13	0.504	5.42	1.646	21.53	8.88	49.7	11.99	130.7	32.2	11070	0.135
AM22	CORE	AM22 CORE	190503	190503_371_LC625	LC625	30	10	3.5	0.191	0.019	0.02657	0.00073	0.03143	0.0527	0.0056	177	16	169	4.6	240	220	1.86	153000	156.4	<65	8.63	0.479	<4.4	506.6	460000	0.546	0.84	<0.079	0.045	12.62	0.082	1.37	2.7	0.814	12.58	3.56	42.5	15.69	79	16.9	162.2	35.42	9620	0.21
AM22	RIM	AM22 RIM	190503	190503_372_LC626	LC626	30	10	3.5	0.1752	0.0088	0.02642	0.0004	0.039184	0.0479	0.0024	163.5	7.6	168.1	2.5	100	110	0.47	153000	119.8	<58	5.91	0.206	<4	421.9	463300	0.892	0.81	<0.059	<0.003	21.12	0.0339	0.76	1.7	0.534	8.64	2.807	33.75	12.8	65.8	14.37	142.6	31.49	11560	0.299
AM22	CORE	AM22 CORE	190503	190503_373_LC627	LC627	30	10	3.5	0.186	0.011	0.02644	0.00073	0.12286	0.0515	0.0032	172.8	9.2	168.2	4.6	240	140	3.25	153000	148	<67	6.85	0.95	<4.6	1072	480000	0.958	0.71	<0.081	0.0269	33	0.182	3.29	7.12	2.09	32	9	100.8	34.2	165	34.1	317	62.6	11250	0.314
AM22	RIM	AM22 RIM	190503	190503_374_LC628	LC628	30	10	3.5	0.178	0.017	0.02619	0.00058	0.39532	0.0504	0.0046	166	15	166.6	3.6	180	190	<0.47	153000	134	<95	3.24	0.11	<6	257.6	440700	0.456	0.66	<0.092	0.107	17.13	0.05	0.58	1.13	0.517	5.15	1.56	19.24	7.49	39.8	8.86	95.8	23.01	10580	0.119
AM22	CORE	AM22 CORE	190503	190503_376_LC629	LC629	30	10	3.5	0.182	0.011	0.02576	0.00042	0.25411	0.0517	0.0034	169.7	9.2	164	2.6	240	140	9.3	153000	181	<65	6.82	3.41	6.3	1220	473800	1.52	0.74	0.59	0.0325	37.1	0.185	3.58	6.99	1.75	31.1	9.06	105.8	37.9	185	38.7	373	76	10840	0.424
AM22	RIM	AM22 RIM	190503	190503_377_LC630	LC630	30	10	3.5	0.171	0.0099	0.02606	0.00056	0.033799	0.0478	0.003	160.1	8.5	165.8	3.5	80	130	0.5	153000	70.2	<61	3.5	0.107	<4.6	338.2	481000	0.715	0.7	<0.061	0.0039	26.5	0.046	0.65	1.67	0.762	7.86	2.12	25.53	9.68	51.3	11.73	118.7	28.17	11860	0.175
AM22	CORE	AM22 CORE	190503	190503_378_LC631	LC631	30	10	3.5	0.182	0.027	0.0274	0.0008	0.20524	0.0483	0.0068	169	23	174.2	5	80	290	<0.43	153000	154	<79	8.66	0.262	<5.5	713	478000	0.987	0.78	<0.094	0.0064	21.6	0.067	1.35	3.09	1.014	15.46	4.47	56.3	21.34	108.9	23.65	233	50.3	9590	0.29
AM22	RIM	AM22 RIM	190503	190503_379_LC632	LC632	30	10	3.5	0.179	0.011	0.0258	0.00041	0.20712	0.0506	0.0032	166.5	9.2	164.2	2.6	200	140	5.5	153000	72.1	<63	18.7	0.205	5.5	405.9	442800	0.54	0.72	0.025	0.064	16.42	0.092	0.73	1.72	0.677	7.9	2.42	29.69	11.77	63.1	14.62	153.9	37	10510	0.153
AM22	CORE	AM22 CORE	190503	190503_381_LC633	LC633	30	10	3.5	0.197	0.011	0.02694	0.00045	0.16491	0.0531	0.0029	181.8	9.3	171.4	2.8	330	110	1020	153000	212	148	14.6	0.49	33.8	1053	446300	1.55	0.72	9.1	0.96	42.3	0.299	2.91	4.89	1.406	24.2	7.22	87.1	31.4	159	34.9	337	74.1	10520	0.419
AM22	RIM	AM22 RIM	190503	190503_382_LC634	LC634	30	10	3.5	0.179	0.011	0.02651	0.00043	0.15244	0.0492	0.003	166.5	9.1	168.7	2.7	130	120	<0.32	153000	97.9	<51	4.53	0.137	<3.9	353.1	450800	0.628	0.8	<0.069	<0.004	17.61	0.0316	0.67	1.41	0.556	7.49	2.194	27	10.31	56.2	12.68	130.7	30.22	10870	0.194
AM22	CORE	AM22 CORE	190503	190503_383_LC635	LC635	30	10	3.5	0.189	0.011	0.02648	0.0005	0.022225	0.0522	0.003	175.6	9.2	168.5	3.1	280	130	1.9	153000	168.5	<60	8.27	0.36	<3.8	792	452400	0.942	0.64	<0.044	0.0113	22.73	0.13	2.05	4.14	1.42	20.52	5.8	67.7	24.37	121.6	25.27	242.9	51.8	9540	0.282
AM22	RIM	AM22 RIM	190503	190503_384_LC636	LC636	30	10	3.5	0.182	0.015	0.02618	0.00072	0.10707	0.051	0.0043	169	13	166.6	4.5	200	180	27	153000	70.3	<57	4.51	0.151	<4.3	419	486000	1.08	0.76	<0.08	0.0092	29.4	0.058	1.18	2.68	0.9	11.5	3.02	34.9	12.61	63.3	14.15	145.3	32.1	11320	0.277
AM22	CORE	AM22 CORE	190503	190503_386_LC637	LC637	30	10	3.5	0.183	0.018	0.02712	0.00088	0.14379	0.0496	0.0055	170	15	172.5	5.5	130	220	1.2	153000	107.6	<68	5.26	0.199	<4.6	633	504000	1.15	0.78	<0.025	0.011	28.1	0.067	1.15	2.25	0.808	12.4	3.81	47.6	18.7	96.5	21.3	217	46.8	11250	0.301
AM22	RIM	AM22 RIM	190503	190503_387_LC638	LC638	30	10	3.5	0.179	0.01	0.02612	0.00034	0.1469	0.0505	0.0029	168.2	9.3	166.2	2.1	210	110	3	153000	58.9	<60	3.48	0.055	<3.7	249.4	454900	0.437	0.665	<0.044	0.0045	16.88	0.0306	0.44	1	0.435	4.78	1.462	18.31	7.15	39.8	9.24	99.3	24.23	10900	0.123
AM22	CORE	AM22 CORE	190503	190503_388_LC639	LC639	30	10	3.5	0.1798	0.0076	0.02588	0.00045	0.40494	0.0501	0.0018	167.6	6.5	164.7	2.8	199	81	3	153000	172.9	<62	6.43	0.331	9.4	992	454500	2.32	0.65	<0.058	0.0072	51.5	0.1	2.12	4.89	1.24	24.8	7.13	85.4	31.2	154.2	32.5	310	66.1	10970	0.573
AM22	RIM	AM22 RIM	190503	190503_389_LC640	LC640	30	10	3.5	0.185	0.017	0.02703	0.00069	0.23155	0.0502	0.0053	172	15	171.9	4.3	160	220	<0.45	153000	79	<84	2.96	<0.07	<6.1	202.5	433400	0.392	0.78	<0.066	<0.0079	14.34	0.0266	0.36	0.88	0.345	4.25	1.355	15.63	6.09	32.5	7.25	78	19.05	10510	0.109
AM22	CORE	AM22 CORE	190503	190503_396_LC641	LC641	30	10	3.5
AM22	RIM	AM22 RIM	190503	190503_397_LC642	LC642	30	10	3.5	0.195	0.011	0.02751	0.00042	0.13323	0.0518	0.0032	180.1	9.7	174.9	2.7	230	130	0.37	153000	93.1	<55	4.14	0.17	<4.3	345.1	456900	0.603	0.591	<0.011	<0.0022	17.93	0.0292	0.63	1.35	0.466	7.09	2.159	26.88	10.25	54.1	11.97	122.6	27.97	11060	0.242
AM22	CORE	AM22 CORE	190503	190503_398_LC643	LC643	30	10	3.5	0.174	0.024	0.02685	0.0008	0.39445	0.0472	0.0062	162	21	170.8	5	50	270	0.8	153000	71	<110	3.4	<0.086	<7	515	430400	0.339	0.66	<0.15	<0.01	15.46	0.102	2.42	3.49	1.53	13.7	3.62	42.9	15.5	82.2	17.9	184	43.1	10030	0.122
AM22	RIM	AM22 RIM	190503	190503_399_LC644	LC644	30	10	3.5	0.179	0.011	0.02668	0.00044	0.16118	0.0493	0.003	166.8	9.5	169.7	2.8	130	120	0.3	153000	56.8	<55	2.97	0.093	<3.7	242.4	452200	0.362	0.638	<0.011	<0.0029	15.75	0.0334	0.53	0.91	0.437	5.31	1.466	17.5	6.86	38.29	8.8	97.5	24.03	10790	0.114
AM22	CORE	AM22 CORE	190503	190503_401_LC645	LC645	30	10	3.5	0.206	0.013	0.0259	0.00048	0.17625	0.0579	0.0037	190	11	164.8	3	470	140	340	153000	129.4	<64	7.5	0.8	11.6	528	446100	0.991	2.13	5.5	0.088	24.71	0.107	1.52	2.86	0.653	12.57	3.69	44.4	15.91	81.9	17.32	168.7	36	10890	0.339
AM22	RIM	AM22 RIM	190503	190503_402_LC646	LC646	30	10	3.5	0.191	0.026	0.02754	0.00095	0.21559	0.0506	0.0067	176	22	175.1	6	160	260	116	153000	158	140	6.4	0.136	6.7	335	435900	0.634	0.68	1.14	0.41	18.26	0.093	0.93	1.53	0.46	6.95	2.23	27.5	10.28	54.3	11.55	111.6	24.68	10250	0.24
AM22	CORE	AM22 CORE	190503	190503_403_LC647	LC647	30	10	3.5	0.185	0.019	0.0263	0.0011	0.16109	0.0515	0.0059	171	16	167.4	6.7	210	250	3.49	153000	162.8	<63	13.8	0.418	<4.6	701	476000	0.463	0.61	<0.092	0.0111	15.43	0.218	4.01	6.32	1.602	22.87	6.32	67	22.32	102.2	20.44	190.7	39.7	10000	0.179
AM22	RIM	AM22 RIM	190503	190503_404_LC648	LC648	30	10	3.5	0.189	0.016	0.02635	0.00064	0.1137	0.0529	0.0046	175	13	167.7	4	240	180	3.69	153000	168.6	<59	13.14	0.396	<4.2	624	454900	0.46	0.7	<0.052	0.0109	14.08	0.14	2.35	4.55	1.35	20.1	5.42	58.7	19.6	91.1	18.1	171.7	35.9	9860	0.184
AM22	CORE	AM22 CORE	190503	190503_406_LC649	LC649	30	10	3.5	0.19	0.025	0.02684	0.00092	0.25303	0.0516	0.0066	176	21	170.7	5.8	200	260	1.43	153000	87	<71	4.9	0.77	<4.8	660	487800	0.441	24	<0.081	0.04	18.3	0.112	2.11	4.5	1.31	18.2	5.23	60.6	20.6	101	21.4	194	40.7	11450	0.167
AM22	RIM	AM22 RIM	190503	190503_407_LC650	LC650	30	10	3.5	0.176	0.011	0.02676	0.00043	0.078786	0.0478	0.0032	163.6	9.5	170.3	2.7	70	140	1.16	153000	85.1	<55	4.41	1.2	<4	388	454300	0.616	10.1	0.049	0.0037	18.36	0.0324	0.85	1.62	0.606	8.28	2.472	30.45	11.64	61.3	13.59	137.9	31.2	10680	0.184
AM22	CORE	AM22 CORE	190503	190503_408_LC651	LC651	30	10	3.5	0.1789	0.0069	0.02643	0.00036	0.1583	0.0493	0.0019	166.9	5.9	168.1	2.3	150	82	<0.3	153000	411	<63	7.5	0.344	<3.8	1493	454700	2.36	0.531	<0.011	0.0088	52.3	0.15	2.5	6.53	1.94	33.9	10.58	126.1	46.2	231	49.2	471	99.2	9270	0.654
AM22	RIM	AM22 RIM	190503	190503_409_LC652	LC652	30	10	3.5	0.171	0.011	0.02665	0.00042	0.0097783	0.0476	0.0035	159.6	9.6	169.6	2.6	60	150	0.35	153000	71.9	<59	4.15	0.115	<4.6	229.5	463400	0.435	0.6	<0.049	<0.0047	13.21	0.0191	0.41	1.06	0.334	4.63	1.454	17.85	6.87	36.6	8.35	86.2	20.64	11610	0.145
AM22	CORE	AM22 CORE	190503	190503_411_LC653	LC653	30	10	3.5	0.178	0.0094	0.02622	0.00055	0.27821	0.0495	0.0026	166.1	8.1	166.8	3.4	160	110	4.9	153000	143	<74	4.34	0.74	5.7	1335	434600	1.15	0.95	<0.1	0.043	34.7	0.297	4.8	9.17	2.88	39.4	10.99	124	42.6	203	40.8	387	80.6	10040	0.343
AM22	CORE	AM22 CORE	190503	190503_412_LC654	LC654	30	10	3.5	0.1771	0.0082	0.02545	0.00038	0.068823	0.0509	0.0027	165.3	7.1	162	2.4	240	120	49	153000	197.4	<78	9.05	0.44	<4.7	855	443200	1.256	0.62	0.17	0.034	31	0.143	2.23	4.75	1.22	22.4	6.35	75	26.7	130.5	26.7	253	53.7	10120	0.393
AM22	RIM	AM22 RIM	190503	190503_413_LC655	LC655	30	10	3.5	0.1782	0.0084	0.02662	0.00036	0.021416	0.0489	0.0024	166.2	7.3	169.3	2.3	120	100	0.51	153000	93	<61	3.22	0.107	<4	264.4	450800	0.462	0.641	<0.058	0.198	18.06	0.071	0.81	1.16	0.451	5.99	1.716	20.51	7.75	41.42	9.47	98	23.07	11090	0.162
AM22	CORE	AM22 CORE	190503	190503_414_LC656	LC656	30	10	3.5	0.177	0.016	0.02671	0.00074	0.037122	0.0485	0.0047	164	14	169.9	4.6	90	200	0.85	153000	125.2	<57	6.85	0.17	<4.1	360	481500	0.648	0.73	<0.074	<0.0038	15.32	0.0218	0.49	1.38	0.415	7.7	2.39	28.6	10.51	54.6	12.12	119.2	26	11710	0.234
AM22	RIM	AM22 RIM	190503	190503_416_LC657	LC657	30	10	3.5	0.207	0.016	0.02694	0.00036	0.15518	0.0556	0.0042	190	14	171.4	2.3	380	150	320	153000	57.6	<63	5.7	0.1	7.4	187	455200	0.482	0.63	1.88	0.082	11.17	0.0174	0.258	0.56	0.209	3.43	1.032	13.7	5.58	29.4	7.02	76.9	19.6	11460	0.146
AM22	CORE	AM22 CORE	190503	190503_417_LC658	LC658	30	10	3.5	0.171	0.012	0.02658	0.00056	0.1861	0.047	0.0034	162	11	169.1	3.5	60	150	1.31	153000	165.4	<63	9.92	0.297	<4	564	457200	0.577	0.68	<0.034	0.0051	14.3	0.085	1.64	2.93	0.898	14.24	4.17	48.1	17.15	84.3	17.6	169.7	36.51	9930	0.228
AM22	RIM	AM22 RIM	190503	190503_418_LC659	LC659	30	10	3.5	0.185	0.014	0.02695	0.00046	0.052682	0.0501	0.0039	172	12	171.4	2.9	160	160	46	153000	50.2	<63	3.24	0.073	<4	151.1	459200	0.28	0.61	0.16	0.0239	11.25	0.0193	0.296	0.471	0.245	2.7	0.831	10.06	4.09	24.1	5.88	66.5	16.9	11460	0.072
AM22	CORE	AM22 CORE	190503	190503_419_LC660	LC660	30	10	3.5	0.179	0.011	0.02545	0.0006	0.40512	0.0513	0.003	167	9.5	162	3.8	240	130	460	153000	156	<87	10.8	0.69	8.3	1080	499000	1.33	0.83	1.99	0.146	38.4	0.169	2.09	4.11	1.27	23.2	7	83	31.9	165	36.5	389	89.1	12210	0.423
AM22	RIM	AM22 RIM	190503	190503_426_LC661	LC661	30	10	3.5	0.1816	0.0076	0.0263	0.00039	0.12199	0.0504	0.0023	169.1	6.6	167.3	2.4	190	100	0.34	153000	58	<56	3.8	0.07	<3.6	294	450800	0.561	0.596	<0.062	<0.0034	22.91	0.0376	0.74	1.47	0.663	7.12	2.028	23.48	8.66	45.9	10.31	108.3	25.19	11080	0.14
AM22	CORE	AM22 CORE	190503	190503_427_LC662	LC662	30	10	3.5	0.186	0.014	0.02662	0.00045	0.22171	0.0509	0.0042	173	12	169.4	2.8	180	170	24	153000	152.8	<65	6.66	0.293	<3.9	855	453800	0.642	0.672	0.107	0.0073	19.9	0.144	2.63	5.33	1.49	24.2	6.9	79.2	27.2	130	26.3	246	51.1	10420	0.241
AM22	RIM	AM22 RIM	190503	190503_428_LC663	LC663	30	10	3.5	0.184	0.025	0.02601	0.00076	0.035835	0.0519	0.0074	170	22	165.5	4.8	210	300	<0.46	153000	86.8	<83	3.67	0.132	<5.9	281.1	430800	0.523	0.54	<0.092	<0.0066	16.77	0.027	0.59	1.16	0.401	5.83	1.79	21.6	8.26	45.1	10.15	103.5	23.98	10370	0.148
AM22	CORE	AM22 CORE	190503	190503_429_LC664	LC664	30	10	3.5	0.175	0.008	0.02542	0.00091	0.57834	0.0501	0.0021	163.7	6.9	161.8	5.7	193	96	560	153000	281	<87	13.2	8.5	11	2780	470000	5.37	0.58	4.7	0.47	150.6	0.96	15.7	24.4	5.57	96.5	25.2	270	90	409	83.1	736	150	10360	1.234
AM22	RIM	AM22 RIM	190503	190503_431_LC665	LC665	30	10	3.5	0.1805	0.0095	0.02586	0.00043	0.14207	0.051	0.0029	168	8.2	164.6	2.7	200	120	<0.3	153000	75.3	<58	3.65	0.096	<3.9	393	451400	0.561	0.632	<0.063	0.0042	25.5	0.0423	0.74	1.66	0.84	8.53	2.45	29.5	11.28	60.8	13.91	147.2	35.5	10640	0.148
AM22	CORE	AM22 CORE	190503	190503_432_LC666	LC666	30	10	3.5	0.189	0.013	0.02621	0.00052	0.12153	0.0528	0.0036	175	11	166.8	3.3	290	150	8.7	153000	135.4	<55	6.15	0.224	<4	351.1	454900	0.754	0.621	<0.078	0.0105	16.33	0.0249	0.431	1.2	0.379	6.85	2.227	28.2	10.55	54.98	12.15	124.1	26.78	11480	0.246
AM22	RIM	AM22 RIM	190503	190503_433_LC667	LC667	30	10	3.5	0.1751	0.0087	0.0262	0.00039	0.15596	0.0492	0.0025	165.1	8.1	166.7	2.5	150	110	0.48	153000	65.2	<53	3.31	0.079	<3.8	259.8	455400	0.357	0.584	<0.067	<0.0037	16.08	0.0283	0.52	0.98	0.498	5.27	1.551	19.52	7.41	40.5	9.12	99.4	24.28	10670	0.09
AM22	CORE	AM22 CORE	190503	190503_434_LC668	LC668	30	10	3.5	0.1796	0.0072	0.02501	0.00038	0.2322	0.0518	0.0018	167.4	6.2	159.2	2.4	270	84	541	153000	215.4	<55	12	1.1	28.2	1830	445000	2.65	0.671	3.34	0.163	83.2	0.408	6.91	14.4	3.89	61.7	16.4	179	58.4	268	52.4	471	93.3	10200	0.588
AM22	RIM	AM22 RIM	190503	190503_436_LC669	LC669	30	10	3.5
AM22	CORE	AM22 CORE	190503	190503_437_LC670	LC670	30	10	3.5	0.181	0.01	0.02641	0.00049	0.12854	0.05	0.0028	168.6	8.7	168	3.1	170	120	5.6	153000	153.5	<61	7.93	1.79	<4	747	459000	0.889	0.65	<0.045	0.0216	25.1	0.122	2.16	4.17	1.19	19.6	5.6	64.8	22.9	112.4	23.1	219	46.4	10110	0.298
AM22	RIM	AM22 RIM	190503	190503_438_LC671	LC671	30	10	3.5	0.198	0.023	0.02631	0.00087	0.29605	0.0547	0.006	183	20	167.4	5.4	340	240	4.3	153000	117	<90	5.57	0.37	<6.2	374	447400	0.598	0.54	0.93	0.039	17.2	0.052	0.62	1.54	0.539	8.2	2.49	29.6	11.28	58.2	12.76	126	27.5	10220	0.192
AM22	CORE	AM22 CORE	190503	190503_439_LC672	LC672	30	10	3.5
AM22	RIM	AM22 RIM	190503	190503_441_LC673	LC673	30	10	3.5	0.187	0.017	0.02642	0.00045	0.16513	0.0517	0.0049	173	14	168.1	2.8	190	180	<0.33	153000	105.5	<59	5.59	0.186	<3.6	349.1	453800	0.587	0.53	<0.034	<0.0043	14.91	0.0246	0.69	1.44	0.449	7.54	2.263	28.58	10.59	55.7	12.24	122.9	27.02	10600	0.2
AM22	CORE	AM22 CORE	190503	190503_442_LC674	LC674	30	10	3.5
AM22	RIM	AM22 RIM	190503	190503_443_LC675	LC675	30	10	3.5
AM22	CORE	AM22 CORE	190503	190503_444_LC676	LC676	30	10	3.5	0.19	0.018	0.02657	0.00054	0.14823	0.0521	0.0049	175	15	169.1	3.4	200	190	0.49	153000	170.6	<69	13.07	0.461	<3.9	792.3	457100	0.431	0.66	<0.045	0.0096	16.55	0.287	4.67	7.7	1.96	28.39	7.19	77.5	25.22	114.5	22.99	210.7	42.95	9370	0.178
AM22	RIM	AM22 RIM	190503	190503_446_LC677	LC677	30	10	3.5	0.171	0.013	0.02685	0.00054	0.18603	0.0462	0.0035	160	11	170.8	3.4	0	150	2.9	153000	203.1	<57	14.59	0.533	<4	862	460100	0.599	0.609	<0.074	0.0438	15.97	0.342	4.9	6.68	1.74	25.5	6.8	78.1	26.92	130.7	27.07	252.8	53	9100	0.254
AM22	CORE	AM22 CORE	190503	190503_447_LC678	LC678	30	10	3.5	0.259	0.034	0.02849	0.00099	0.12482	0.0667	0.0085	231	27	181.1	6.2	690	270	2.82	153000	158	<62	8.9	1.47	<4.3	550	501000	0.454	5.3	0.067	0.0159	13.3	0.078	1.45	3.24	0.97	14.8	4.17	49.3	17.2	83	17.2	169	34.5	11020	0.191
AM22	RIM	AM22 RIM	190503	190503_448_LC679	LC679	30	10	3.5	0.185	0.014	0.02746	0.00058	0.0016165	0.0494	0.0038	172	12	174.6	3.6	120	160	0.49	153000	171.1	<55	8.93	0.266	<4	434.1	450100	0.62	0.624	<0.052	<0.0033	14.56	0.0412	0.81	2.04	0.606	9.58	2.96	35.9	13.09	66.4	14.1	142.5	30.79	10240	0.261
AM22	CORE	AM22 CORE	190503	190503_449_LC680	LC680	30	10	3.5	0.172	0.015	0.02609	0.00087	0.168	0.0494	0.0047	165	15	166	5.5	130	190	1.84	153000	79	<64	4.46	0.163	8.7	479	485000	0.78	0.66	0.146	<0.0033	23.7	0.056	0.84	2.44	0.72	11.7	3.41	40.6	14.5	75	16.1	156	33.9	12000	0.23
AM22	RIM	AM22 RIM	190503	190503_456_LC681	LC681	30	10	3.5	0.175	0.011	0.02616	0.0004	0.18311	0.0483	0.0029	163.6	9.2	166.5	2.5	110	130	0.4	153000	59.7	<66	3.72	0.116	<4.2	334	469300	0.529	0.648	<0.061	<0.0034	19.5	0.043	0.7	1.37	0.579	7.18	2.09	25.3	9.49	51.6	12.04	128.5	32	11210	0.116
AM22	CORE	AM22 CORE	190503	190503_457_LC682	LC682	30	10	3.5	0.189	0.014	0.02666	0.0007	0.36393	0.0521	0.0047	175	12	169.6	4.4	230	180	0.9	153000	165.7	<65	8.07	0.691	<4.7	670	473100	1.09	1.15	<0.055	0.038	29.2	0.085	1.5	3	0.833	15.8	4.61	55.6	20.2	102.6	21.43	206.4	44.3	10560	0.332
AM22	RIM	AM22 RIM	190503	190503_458_LC683	LC683	30	10	3.5	0.1884	0.0087	0.02678	0.00041	0.14462	0.0512	0.0023	174.9	7.4	170.4	2.6	222	97	9.3	153000	74.6	<56	4.14	0.131	<4	284	452900	0.574	0.625	<0.034	0.037	18.78	0.0344	0.82	1.16	0.421	5.92	1.796	22	8.34	44	10	105.6	24.5	11180	0.186
AM22	CORE	AM22 CORE	190503	190503_459_LC684	LC684	30	10	3.5	0.169	0.021	0.02656	0.00066	0.12458	0.0466	0.006	157	18	169	4.1	-20	240	2.63	153000	108.9	<67	7.75	0.266	<4.7	330.6	470000	0.348	0.69	<0.017	<0.0031	9.97	0.0386	0.68	1.77	0.575	9.09	2.59	29.7	10.27	50.8	10.55	103.6	22.77	11220	0.14
AM22	RIM	AM22 RIM	190503	190503_461_LC685	LC685	30	10	3.5	0.19	0.014	0.0273	0.00075	0.044196	0.0507	0.004	176	12	173.6	4.7	190	160	3.39	153000	112.5	<61	8.37	0.255	<4.5	249.9	466900	0.464	0.59	<0.044	<0.0042	12.34	0.0152	0.38	0.96	0.396	5.34	1.692	21.13	7.68	39.5	8.56	86.3	19.31	11040	0.201
AM22	CORE	AM22 CORE	190503	190503_462_LC686	LC686	30	10	3.5	0.184	0.012	0.0269	0.00061	0.29307	0.0496	0.0031	171	10	171.1	3.8	150	130	5.3	153000	181	91	6.27	0.54	<4.2	1119	462000	1.138	0.67	<0.054	0.25	34.4	0.237	4.03	7.33	1.96	32.3	8.92	102.3	34.9	166.6	33.6	316.9	65.2	10550	0.346
AM22	RIM	AM22 RIM	190503	190503_463_LC687	LC687	30	10	3.5	0.1786	0.0081	0.02523	0.00041	0.13119	0.0507	0.003	166.7	7	160.6	2.6	210	130	1.07	153000	146	<72	5.42	0.366	<4.5	903	465100	2.12	0.498	<0.044	0.121	41.7	0.09	1.55	3.08	0.974	18.1	5.53	70.9	27.3	143	30.9	310	66.8	11760	0.644
AM22	CORE	AM22 CORE	190503	190503_464_LC688	LC688	30	10	3.5	0.17	0.01	0.0263	0.0005	0.18735	0.0476	0.0031	159.3	8.6	167.3	3.1	60	130	<0.37	153000	90	<71	4.44	0.172	<4	725	452000	0.767	0.68	<0.053	0.0097	26.2	0.137	2.43	4.22	1.37	18.3	4.89	58.7	21.5	111.5	23.9	240	54.3	10530	0.23
AM22	RIM	AM22 RIM	190503	190503_466_LC689	LC689	30	10	3.5	0.1785	0.0094	0.02653	0.00038	0.16281	0.0491	0.0028	166.3	8.1	168.8	2.4	120	120	<0.36	153000	75	<56	3.96	0.101	<3.9	334.3	456900	0.53	0.68	<0.078	<0.004	21.56	0.0387	0.78	1.47	0.554	7.67	2.126	26.35	10.08	52.6	11.7	120.1	27.76	10920	0.187
AM22	CORE	AM22 CORE	190503	190503_467_LC690	LC690	30	10	3.5	0.178	0.018	0.0266	0.00065	0.21771	0.049	0.0053	166	16	169.2	4.1	110	220	2.64	153000	70	<84	2.93	0.33	<5.8	442	436800	0.244	1.89	0.29	0.275	12.48	0.182	1.9	2.83	1.14	10.8	2.96	33.7	12.4	66.6	15	156	39.7	10330	0.07
AM22	RIM	AM22 RIM	190503	190503_468_LC691	LC691	30	10	3.5	0.184	0.02	0.02208	0.00069	0.6983	0.0589	0.0047	171	17	140.8	4.4	510	160	750	153000	49	1370	9.8	4.5	1260	273	377000	0.366	3.31	3.8	0.141	9.5	0.126	0.85	0.72	0.81	3.38	0.92	13.4	6.51	46.6	12.6	168	51.8	11990	0.059
AM22	CORE	AM22 CORE	190503	190503_469_LC692	LC692	30	10	3.5
AM22	RIM	AM22 RIM	190503	190503_471_LC693	LC693	30	10	3.5	0.187	0.011	0.02626	0.00043	0.010923	0.051	0.0029	173.1	9.3	167.1	2.7	230	130	160	153000	58.7	<60	4.9	0.077	10.9	232.5	456800	0.479	0.627	0.33	0.09	16.46	0.041	0.47	1.1	0.379	4.59	1.438	17.72	6.68	36.6	8.47	90.4	22.73	11180	0.131
AM22	CORE	AM22 CORE	190503	190503_472_LC694	LC694	30	10	3.5	0.15	0.036	0.02559	0.00093	0.22431	0.0427	0.0097	141	32	162.9	5.8	-150	440	<0.88	153000	169	<180	6.2	0.521	<12	898	432000	1.12	0.34	<0.18	<0.014	25.2	0.106	1.87	3.73	1.37	21.9	6.3	72.7	26.35	135.3	28.74	276.4	59.6	9470	0.41
AM22	RIM	AM22 RIM	190503	190503_473_LC695	LC695	30	10	3.5	0.1805	0.008	0.02639	0.00031	0.057267	0.0498	0.0023	168.2	6.9	167.9	1.9	162	99	0.57	153000	84.6	<63	3.91	0.107	<4.1	353.7	456500	0.648	0.616	<0.059	0.0074	22.32	0.0392	0.77	1.51	0.555	7.63	2.237	26.98	10.29	54.7	12.12	125.3	28.69	11100	0.198
AM22	CORE	AM22 CORE	190503	190503_474_LC696	LC696	30	10	3.5	0.184	0.011	0.02628	0.00046	0.078991	0.051	0.0032	170.9	9.8	167.2	2.9	200	130	0.41	153000	166.3	<62	13.89	0.609	<4.6	756	454600	0.496	0.703	<0.046	0.0256	18.41	0.323	4.77	7	1.96	25.8	6.71	71.4	23.75	110.4	21.96	205.6	42.3	9780	0.209
AM22	RIM	AM22 RIM	190503	190503_476_LC697	LC697	30	10	3.5	0.184	0.012	0.02674	0.00059	0.12267	0.0497	0.0033	170	11	170.1	3.7	170	150	1.6	153000	115	<64	5.59	0.2	<4	288	452600	0.546	0.588	<0.059	0.13	16.17	0.057	0.66	1.35	0.389	6.18	1.92	23.6	8.88	45.3	9.85	99.6	21.73	11040	0.209
AM22	CORE	AM22 CORE	190503	190503_477_LC698	LC698	30	10	3.5	0.184	0.017	0.02689	0.0006	0.056452	0.0496	0.0043	171	14	171	3.8	150	190	<0.43	153000	186	<83	5.74	0.328	<5.4	825	433800	0.88	0.58	<0.057	0.019	25.1	0.133	2.42	4.29	1.33	20.8	5.98	70.9	25.3	123	25.6	244	51.3	9710	0.247
AM22	RIM	AM22 RIM	190503	190503_478_LC699	LC699	30	10	3.5	0.193	0.012	0.02677	0.00047	0.48006	0.0521	0.0029	179	10	170.3	3	260	120	258	153000	48.8	<64	6.03	0.446	7.7	157.5	456100	0.331	5.3	3.14	0.075	12.25	0.022	0.236	0.57	0.306	2.77	0.849	10.18	4.29	24.7	6.02	70.1	19.18	11250	0.075
AM22	CORE	AM22 CORE	190503	190503_479_LC700	LC700	30	10	3.5	0.171	0.011	0.02538	0.00073	0.36693	0.0489	0.0028	160.1	9.3	161.5	4.6	130	120	188	153000	184	<66	7.23	0.478	<4.3	1308	469600	1.19	0.73	0.115	0.0203	35.4	0.253	4.42	7.73	2.18	38.1	10.47	118.5	41.6	199	40.1	363	74.3	10550	0.372
AM22	RIM	AM22 RIM	190503	190503_486_LC701	LC701	30	10	3.5	0.1685	0.0066	0.0249	0.0003	0.28301	0.0491	0.0019	157.9	5.8	158.6	1.9	155	76	1.16	153000	78.2	<57	4.14	0.122	<4	386.2	451400	0.555	0.553	<0.068	<0.0029	26.72	0.0498	0.85	2.07	0.968	10.02	2.675	31.33	11.21	57.1	12.74	130.1	31.79	10610	0.143
AM22	CORE	AM22 CORE	190503	190503_487_LC702	LC702	30	10	3.5	0.199	0.016	0.02774	0.00062	0.085507	0.0522	0.0042	183	13	176.3	3.9	230	170	1.03	153000	99	<57	5.05	0.141	<3.8	394	456600	0.435	0.594	<0.036	0.0041	12.34	0.057	0.89	1.92	0.67	9.8	2.73	32.8	11.9	60.9	13.3	130	28.6	11290	0.161
AM22	RIM	AM22 RIM	190503	190503_488_LC703	LC703	30	10	3.5	0.202	0.018	0.0273	0.00078	0.18755	0.0537	0.0047	186	15	173.6	4.9	310	190	0.43	153000	65.3	<77	4.08	0.134	<4.4	436	471300	0.505	0.64	<0.071	<0.0056	16.53	0.061	0.81	2.15	0.75	9.7	2.69	32.8	12.34	65.9	15.14	160	37.1	11510	0.172
AM22	CORE	AM22 CORE	190503	190503_489_LC704	LC704	30	10	3.5	0.171	0.015	0.0267	0.00087	0.22237	0.0465	0.004	160	13	169.8	5.4	90	210	11	153000	176.1	<82	10.28	0.953	<4.3	553.2	479100	0.767	0.61	0.094	0.022	16.81	0.08	1.46	2.8	0.634	12.47	3.91	46.8	16.96	85.9	18.46	181.7	38.34	10980	0.303
AM22	RIM	AM22 RIM	190503	190503_491_LC705	LC705	30	10	3.5	0.1896	0.0099	0.02585	0.00075	0.44489	0.0537	0.0028	176.1	8.6	164.5	4.7	340	120	6.3	153000	70	<69	4.45	0.306	12.1	450	502700	0.613	0.88	<0.068	<0.0053	19.7	0.054	0.82	1.95	0.74	9.8	2.59	32.2	13.17	69.5	16.1	170.8	40.3	11330	0.187
AM22	CORE	AM22 CORE	190503	190503_492_LC706	LC706	30	10	3.5	0.184	0.013	0.02704	0.00062	0.12581	0.0495	0.0035	171	11	172	3.9	130	140	3.8	153000	150	180	4.58	0.346	<4.1	409	464400	0.488	1.28	<0.046	0.8	15.2	0.084	1.3	1.83	0.687	8.86	2.67	33.6	12.12	63.6	13.99	138.6	31.6	11710	0.182
AM22	RIM	AM22 RIM	190503	190503_493_LC707	LC707	30	10	3.5	0.19	0.013	0.02677	0.00049	0.22669	0.0514	0.0034	176	11	170.3	3.1	210	140	<0.3	153000	80.9	<59	4.56	0.178	<3.8	370	457000	0.611	0.606	<0.072	0.0041	15.14	0.0322	0.66	1.38	0.536	7.17	2.183	27.65	10.72	57.5	12.91	135.5	31.7	10880	0.214
AM22	CORE	AM22 CORE	190503	190503_494_LC708	LC708	30	10	3.5	0.18	0.011	0.02642	0.00037	0.053983	0.0494	0.0032	167	9.8	168.1	2.3	130	130	0.35	153000	66	<61	3.6	0.613	<3.8	264.7	456000	0.485	1.21	<0.065	0.004	14.61	0.0287	0.48	1.03	0.447	5.39	1.569	19.63	7.6	42.2	9.58	102.8	25.15	11050	0.134
BS1	CORE	BS1 CORE	190503	190503_496_LC709	LC709	30	10	3.5	0.192	0.018	0.0269	0.00071	0.089107	0.0522	0.0049	178	15	171.1	4.5	240	190	2.06	153000	138.2	<65	9.82	0.369	<4	359.8	497000	0.742	0.66	<0.07	<0.0041	17.57	0.0316	0.58	1.52	0.418	8.15	2.4	29.6	10.55	53.7	11.91	117.3	25.43	12450	0.331
BS1	RIM	BS1 RIM	190503	190503_497_LC710	LC710	30	10	3.5
BS1	CORE	BS1 CORE	190503	190503_498_LC711	LC711	30	10	3.5	0.204	0.017	0.02665	0.00096	0.3724	0.0564	0.0056	188	14	169.5	6	410	210	4	153000	186.1	<79	17.2	1.96	5.4	1032	506000	0.654	0.73	0.46	0.0329	20.5	0.373	5.46	8.12	2.18	32.8	8.64	97.8	32.5	149.7	29.5	272	55.9	10200	0.255
BS1	RIM	BS1 RIM	190503	190503_499_LC712	LC712	30	10	3.5	0.221	0.022	0.02621	0.00064	0.37905	0.0629	0.0065	207	21	166.7	4	600	200	94	153000	149	<80	8.8	0.309	89	556	437400	1.103	0.62	1.7	0.052	20.25	0.067	1.01	2.16	0.613	10.68	3.59	42.5	16.61	86	18.43	183.8	40.1	10650	0.379
BS1	CORE	BS1 CORE	190503	190503_501_LC713	LC713	30	10	3.5	0.192	0.019	0.02682	0.00059	0.033343	0.0511	0.005	176	16	170.6	3.7	190	200	1.86	153000	154.1	<64	12.75	0.491	<3.7	471	449400	0.544	0.661	<0.06	0.0065	13.85	0.086	1.62	3.31	0.86	14.1	3.85	42.6	14.45	69.4	14.07	132.3	27.9	9690	0.19
BS1	RIM	BS1 RIM	190503	190503_502_LC714	LC714	30	10	3.5	0.197	0.027	0.02667	0.00068	0.015232	0.0539	0.0076	181	23	169.7	4.3	270	300	5.46	153000	123.1	<75	9.1	0.248	<4.5	228.1	489000	0.503	0.67	<0.078	<0.0046	11.46	0.0182	0.26	0.84	0.221	4.29	1.435	18.02	6.69	35.1	7.86	82.3	18.14	11580	0.223
BS1	CORE	BS1 CORE	190503	190503_503_LC715	LC715	30	10	3.5	0.224	0.025	0.0269	0.00079	0.013364	0.0598	0.0065	203	20	171.1	5	470	210	115	153000	195.3	<79	13.1	0.401	74	711	435900	0.546	0.5	0.67	0.039	12.78	0.162	2.43	4.62	1.222	19.1	5.36	61.9	21.59	104.3	21.62	196.9	42.2	8970	0.184
BS1	RIM	BS1 RIM	190503	190503_504_LC716	LC716	30	10	3.5	0.178	0.014	0.02658	0.0004	0.048885	0.0486	0.0038	165	12	169.1	2.5	90	150	2.18	153000	217	<61	10.97	0.295	<3.8	442.7	448800	0.639	0.589	<0.059	0.34	15.8	0.13	1.1	2.25	0.632	10.37	3.096	36.7	13.38	68.6	14.43	139.5	30.25	9930	0.245
BS1	CORE	BS1 CORE	190503	190503_506_LC717	LC717	30	10	3.5	0.187	0.014	0.02738	0.00059	0.16036	0.0493	0.0038	173	12	174.1	3.7	120	150	4	153000	141.4	<56	10.36	0.251	<4	541	447600	0.409	0.599	<0.072	0.0077	11.93	0.104	1.63	3.13	0.976	14.4	4.06	47.1	16.4	80.8	16.7	158.3	33.5	9760	0.144
BS1	RIM	BS1 RIM	190503	190503_507_LC718	LC718	30	10	3.5	0.483	0.06	0.02522	0.00083	0.42465	0.138	0.015	394	41	160.6	5.2	2100	210	62.5	153000	143.7	165	8.51	1.08	74	360.3	451500	2.31	0.69	765	0.148	12.84	0.1	1.08	1.82	0.565	7.6	2.38	29.3	10.61	56.1	12.3	121.8	26.67	10400	0.227
BS1	CORE	BS1 CORE	190503	190503_508_LC719	LC719	30	10	3.5	0.178	0.018	0.026	0.0006	0.19672	0.0485	0.0045	164	15	165.4	3.8	90	190	7.51	153000	169.1	<58	14.86	0.465	<3.7	367.1	469000	0.556	0.59	0.141	<0.0038	13.23	0.0531	1.02	2.03	0.609	9.22	2.769	32.18	11.35	55.37	11.79	111.2	24.2	9950	0.215
BS1	RIM	BS1 RIM	190503	190503_509_LC720	LC720	30	10	3.5	0.197	0.027	0.02661	0.00081	0.19856	0.0535	0.007	181	23	169.3	5.1	270	280	4.08	153000	117.4	<59	9.6	0.3	<4.2	265.9	495800	0.502	0.67	0.067	0.0049	13.64	0.0181	0.52	0.9	0.361	5.88	1.792	22.85	7.85	41.8	9.11	89.2	19.3	11160	0.216
BS1	CORE	BS1 CORE	190503	190503_516_LC721	LC721	30	10	3.5	0.183	0.016	0.02571	0.00084	0.07038	0.0518	0.0046	170	14	163.6	5.3	230	190	3.02	153000	170.1	<61	11.1	0.399	<4.5	591	491000	0.546	0.76	<0.063	<0.0051	14.13	0.097	2.12	4.3	1.19	16.9	4.82	54.4	18.3	87.9	17.9	171.9	35.5	11030	0.189
BS1	RIM	BS1 RIM	190503	190503_517_LC722	LC722	30	10	3.5	0.857	0.091	0.0308	0.0012	0.77881	0.199	0.016	621	49	195.7	7.5	2780	130	513	153000	187	91	18.4	1	577	651	483000	1.13	0.62	6.8	0.316	19.49	0.3	2.93	4.28	2.53	17.96	5.09	56.9	18.85	92.4	19.13	188.5	40.46	10790	0.357
BS1	CORE	BS1 CORE	190503	190503_518_LC723	LC723	30	10	3.5	0.752	0.042	0.0311	0.0018	0.5251	0.1763	0.0078	569	24	197	11	2613	74	16.7	153000	213	160	14.2	0.649	18.7	590	517000	0.496	0.9	5.3	0.65	13.9	0.32	3.14	4.09	1.34	17.5	4.74	53.2	18.04	85.4	17.91	164.1	34.2	10260	0.175
BS1	RIM	BS1 RIM	190503	190503_519_LC724	LC724	30	10	3.5	0.168	0.014	0.02632	0.00059	0.18834	0.0466	0.004	157	12	167.5	3.7	0	170	5.37	153000	152.9	<56	12.17	0.314	<3.5	320.7	477200	0.524	0.599	<0.033	<0.0033	12.63	0.0225	0.391	1.32	0.484	7.58	2.284	26.87	9.69	48.9	10.3	100.9	22.06	10440	0.189
BS1	CORE	BS1 CORE	190503	190503_521_LC725	LC725	30	10	3.5	0.18	0.014	0.02641	0.00048	0.1262	0.0493	0.0037	167	12	168	3	110	150	1.16	153000	230	<49	12.85	0.348	<3.4	606	468600	0.758	0.612	<0.072	0.0052	13.46	0.074	1.31	2.78	0.779	12.37	3.9	46.8	17.65	93.6	20.96	208.4	47.9	9767	0.298
BS1	RIM	BS1 RIM	190503	190503_522_LC726	LC726	30	10	3.5	0.217	0.02	0.02603	0.00054	0.19909	0.0606	0.0055	198	17	165.6	3.4	570	210	6.5	153000	147.8	<56	9.16	0.238	4.5	395	466200	0.625	0.698	2.4	0.0118	13.88	0.0413	0.6	1.77	0.459	8.88	2.67	32.5	11.76	59.4	12.77	126.3	27.2	11030	0.281
BS1	CORE	BS1 CORE	190503	190503_523_LC727	LC727	30	10	3.5
BS1	RIM	BS1 RIM	190503	190503_524_LC728	LC728	30	10	3.5	0.189	0.019	0.02671	0.00052	0.0058431	0.0512	0.0052	174	16	169.9	3.3	190	220	3.67	153000	221	<62	10.82	0.389	<4	940	478000	0.598	0.59	0.054	0.035	13.75	0.3	3.82	6.11	1.81	24.3	6.72	78	28.7	144	29.7	289	63.1	9780	0.276
BS1	CORE	BS1 CORE	190503	190503_526_LC729	LC729	30	10	3.5	0.282	0.035	0.0274	0.00051	0.083232	0.0739	0.0088	247	27	174.2	3.2	820	240	253	153000	212.4	72	20	0.799	14.2	540	459000	0.68	0.54	8	0.18	16.04	0.165	2.02	3.83	1.015	16	4.31	49.2	16.52	80	16.44	157.5	33.5	9560	0.259
BS1	RIM	BS1 RIM	190503	190503_527_LC730	LC730	30	10	3.5	0.196	0.015	0.0268	0.00059	0.01082	0.0533	0.0042	181	13	170.5	3.7	290	160	5.9	153000	177.8	<59	12.94	0.407	5.9	399	460800	0.707	0.593	0.098	0.0039	16.79	0.053	0.9	2.25	0.646	10.57	2.963	35.13	12.14	59.57	12.26	120.5	25.32	10160	0.263
BS1	CORE	BS1 CORE	190503	190503_528_LC731	LC731	30	10	3.5
BS1	RIM	BS1 RIM	190503	190503_529_LC732	LC732	30	10	3.5	0.178	0.015	0.02607	0.00048	0.11017	0.0496	0.0042	165	13	165.9	3	120	170	2.99	153000	160.5	<53	13.2	0.38	<3.7	365.9	467000	0.593	0.599	<0.062	0.0048	15.86	0.0354	0.71	1.85	0.533	8.93	2.64	31.13	10.98	54.9	11.43	113.2	23.95	10350	0.202
BS1	CORE	BS1 CORE	190503	190503_531_LC733	LC733	30	10	3.5	0.304	0.047	0.02851	0.00074	0.6195	0.075	0.01	262	34	181.2	4.6	840	260	3.28	153000	167	<60	8.75	0.265	15	565	452700	0.536	0.625	<0.06	0.0083	13.62	0.09	1.61	3	0.851	14.1	4.01	48.6	17.3	86.4	17.6	170	36	10190	0.216
BS1	RIM	BS1 RIM	190503	190503_532_LC734	LC734	30	10	3.5	0.212	0.032	0.02708	0.00067	0.3322	0.0541	0.0074	194	26	172.2	4.2	360	290	6.1	153000	187	<69	8.45	0.28	5.3	465.5	470500	0.827	0.66	0.154	0.3	15.77	0.123	1.33	2.02	0.431	9.46	3.05	37.9	14.27	70.2	15.32	153.9	32.95	11530	0.316
BS1	CORE	BS1 CORE	190503	190503_533_LC735	LC735	30	10	3.5	0.173	0.014	0.02619	0.00042	0.10271	0.0478	0.004	161	12	166.7	2.6	40	160	6.3	153000	221	<61	14.2	0.312	<4	457.5	462100	0.589	0.65	<0.055	0.0056	12.82	0.0624	1.29	2.36	0.745	10.78	3.18	37.97	13.74	70.2	15.04	151.2	33.3	9290	0.193
BS1	RIM	BS1 RIM	190503	190503_534_LC736	LC736	30	10	3.5	0.174	0.015	0.02614	0.00062	0.051671	0.0485	0.0042	162	13	166.4	3.9	110	180	1.14	153000	151.1	<61	9.98	0.311	<4.1	390.5	459600	0.577	0.622	<0.045	0.021	14.1	0.042	0.69	1.78	0.518	8.58	2.612	32.25	11.95	60.4	12.98	128.6	27.75	10460	0.234
BS1	CORE	BS1 CORE	190503	190503_536_LC737	LC737	30	10	3.5
BS1	RIM	BS1 RIM	190503	190503_537_LC738	LC738	30	10	3.5
BS1	CORE	BS1 CORE	190503	190503_538_LC739	LC739	30	10	3.5
BS1	RIM	BS1 RIM	190503	190503_539_LC740	LC740	30	10	3.5	0.181	0.013	0.02652	0.00054	0.18102	0.0504	0.0039	171	12	168.7	3.4	150	150	2.23	153000	162.3	<68	9.18	0.263	<4.1	352.5	461700	0.625	0.64	<0.046	<0.0047	13.53	0.0298	0.61	1.64	0.511	8.22	2.453	29.34	10.56	54.3	11.49	113.2	24.42	10590	0.219
BS1	CORE	BS1 CORE	190503	190503_546_LC741	LC741	30	10	3.5	0.168	0.02	0.02597	0.00069	0.11743	0.0482	0.0061	159	19	165.3	4.3	10	230	7.57	153000	181.4	<63	15.37	0.413	<3.9	584	460300	0.395	0.586	0.04	0.0102	12.82	0.124	2.23	4.05	1.146	17.35	4.76	52.7	17.83	84.7	17.25	162.4	34.22	9580	0.155
BS1	RIM	BS1 RIM	190503	190503_547_LC742	LC742	30	10	3.5	0.18	0.029	0.02599	0.00073	0.088344	0.0505	0.0083	166	24	165.4	4.6	90	300	6.32	153000	134	<66	10.43	0.337	<4.2	236.4	474700	0.509	0.58	<0.055	<0.0046	12.37	0.0255	0.37	1.01	0.287	5.19	1.622	19.75	7.13	37.21	8.13	80.8	17.74	11010	0.201
BS1	CORE	BS1 CORE	190503	190503_548_LC743	LC743	30	10	3.5	0.19	0.014	0.02624	0.00057	0.3047	0.0524	0.0037	176	12	167	3.6	250	150	2.36	153000	149.5	<57	10.79	0.773	9	607	466900	0.517	0.547	<0.037	0.0132	14.01	0.0725	1.56	3.59	1.067	17.09	4.9	55.7	18.8	88.8	18.09	171.3	35.8	10560	0.195
BS1	RIM	BS1 RIM	190503	190503_549_LC744	LC744	30	10	3.5	0.31	0.028	0.02556	0.00086	0.17976	0.0882	0.0078	273	22	162.7	5.4	1400	140	34	153000	167	<89	9.4	0.913	28.2	430.7	458300	0.677	0.55	2.8	0.073	13.42	0.102	1.04	2.28	0.87	10.96	3.24	37.8	13.16	64.2	13.5	133	27.97	10230	0.234
BS1	CORE	BS1 CORE	190503	190503_551_LC745	LC745	30	10	3.5	0.194	0.016	0.0257	0.00077	0.012321	0.0548	0.0045	179	13	163.6	4.9	350	180	4.9	153000	174	<70	14.73	0.552	<4.5	626	474100	0.63	0.562	<0.048	0.019	15.86	0.168	2.51	4.5	1.203	17.9	4.93	56.5	19.6	92.7	19.04	179.8	37	10090	0.219
BS1	RIM	BS1 RIM	190503	190503_552_LC746	LC746	30	10	3.5	0.193	0.019	0.02637	0.00062	0.0082784	0.0534	0.0053	177	16	167.8	3.9	230	200	6.57	153000	132.3	<61	10.13	0.324	<4	226.7	462600	0.513	0.657	<0.054	0.03	12.47	0.0267	0.39	0.97	0.267	4.82	1.534	18.5	6.96	35.67	7.74	79	17.23	10970	0.197
BS1	CORE	BS1 CORE	190503	190503_553_LC747	LC747	30	10	3.5	0.172	0.021	0.02614	0.00078	0.14183	0.0479	0.006	160	18	166.3	4.9	20	230	1.78	153000	295	<78	13.23	0.419	<4.4	343	451600	0.529	0.63	<0.057	0.075	13.3	0.068	0.78	1.48	0.445	8.29	2.563	29.61	10.62	52.3	11.13	107.6	23.24	9910	0.19
BS1	RIM	BS1 RIM	190503	190503_554_LC748	LC748	30	10	3.5	0.264	0.028	0.02556	0.00086	0.11023	0.0755	0.0088	236	23	162.7	5.4	970	250	29.1	153000	133.3	<62	10.84	0.343	29.8	315.9	488400	0.636	0.51	0.56	0.0151	12.58	0.036	0.66	1.34	0.447	7.05	2.03	24.96	9.43	49.2	10.54	104.4	22.41	11070	0.229
BS1	CORE	BS1 CORE	190503	190503_556_LC749	LC749	30	10	3.5	0.365	0.024	0.02787	0.00062	0.0801	0.0969	0.0071	322	18	177.2	3.9	1510	140	1580	153000	134.2	100	31.7	0.944	98	478	441400	0.562	0.74	2.58	0.851	16.46	0.276	2.39	3.53	0.768	14.71	4.03	44.3	14.55	70.5	14.09	130.3	26.99	9730	0.169
BS1	RIM	BS1 RIM	190503	190503_557_LC750	LC750	30	10	3.5	0.402	0.039	0.02686	0.00081	0.27936	0.109	0.01	338	28	170.8	5.1	1610	200	1750	153000	130	134	48	0.721	267	307	423200	0.844	0.8	12.4	0.99	16.79	0.3	1.67	1.73	0.86	7.82	2.3	25.8	9.05	45.4	9.9	97.7	21	10630	0.268
BS1	CORE	BS1 CORE	190503	190503_558_LC751	LC751	30	10	3.5
BS1	RIM	BS1 RIM	190503	190503_559_LC752	LC752	30	10	3.5	0.357	0.038	0.02677	0.00067	0.39005	0.097	0.01	306	28	170.3	4.2	1490	210	65	153000	151.5	<82	8.47	0.296	66	939	461000	0.788	0.66	8.5	0.159	20.57	0.246	2.96	5.25	1.82	24.6	6.93	81.6	28.1	138.4	28	266	55.6	9620	0.255
BS1	CORE	BS1 CORE	190503	190503_561_LC753	LC753	30	10	3.5	0.192	0.014	0.02654	0.00056	0.01028	0.0536	0.0042	180	13	168.9	3.5	280	160	0.94	153000	148.8	<64	8.63	0.332	<4.3	412.8	459500	0.652	0.583	0.087	<0.0032	15.04	0.0286	0.66	1.76	0.512	9.74	2.819	34.84	12.34	62	13.25	131.4	28.25	11090	0.248
BS1	RIM	BS1 RIM	190503	190503_562_LC754	LC754	30	10	3.5	0.322	0.064	0.0276	0.0012	0.025187	0.085	0.017	279	49	175.6	7.6	1090	450	11.8	153000	332	<110	8.2	0.8	124	514	451400	0.634	0.59	0.21	0.037	15.46	0.088	1.32	2.67	0.64	13.1	3.83	44.8	15.6	76.5	15.91	153.7	32.89	10660	0.262
BS1	CORE	BS1 CORE	190503	190503_563_LC755	LC755	30	10	3.5	0.196	0.016	0.02666	0.00055	0.042324	0.0535	0.0045	181	14	169.6	3.5	260	170	1.05	153000	138.1	<66	8.94	0.243	<4.4	362.7	459200	0.632	0.589	<0.049	<0.0052	12.09	0.03	0.74	1.49	0.43	7.8	2.494	30.36	10.99	56.5	12.05	121.1	26.29	10890	0.244
BS1	RIM	BS1 RIM	190503	190503_564_LC756	LC756	30	10	3.5	0.182	0.011	0.02596	0.00051	0.2342	0.0512	0.0035	169.3	9.7	165.2	3.2	200	140	1.84	153000	166.1	<71	7.12	0.236	<4.4	404	463600	0.765	0.507	0.09	0.224	17.22	0.093	0.7	1.79	0.447	8.26	2.684	33.18	12.01	63.3	13.18	133.5	28.72	11350	0.318
BS1	CORE	BS1 CORE	190503	190503_566_LC757	LC757	30	10	3.5	0.183	0.013	0.02617	0.0005	0.1929	0.0509	0.0038	170	11	166.5	3.2	200	150	1.21	153000	170.2	<62	12.09	0.44	<4.2	832	463700	0.574	0.65	<0.038	0.0202	16.36	0.25	3.46	5.96	1.46	25.1	6.8	75.7	25.3	120.9	24.2	226	46.4	10260	0.229
BS1	RIM	BS1 RIM	190503	190503_567_LC758	LC758	30	10	3.5	0.477	0.063	0.02664	0.0008	0.17793	0.125	0.015	388	42	169.4	5	1990	210	124	153000	146	147	13.7	0.47	127	343	404000	0.471	0.53	14.3	0.131	12.81	0.1	1.26	1.6	0.74	7.95	2.19	26.8	9.85	51.6	10.26	104.5	22.3	9120	0.166
BS1	CORE	BS1 CORE	190503	190503_568_LC759	LC759	30	10	3.5	0.203	0.02	0.02563	0.00058	0.16561	0.0576	0.0056	187	16	163.1	3.6	440	210	520	153000	131	<97	9.6	0.309	46.2	719	441300	0.537	0.63	3.05	0.093	17.39	0.086	1.23	4.1	1.01	20.1	5.81	65.7	22.4	103.8	21.2	206	42.4	10810	0.163
BS1	RIM	BS1 RIM	190503	190503_569_LC760	LC760	30	10	3.5	0.456	0.07	0.0265	0.001	0.49754	0.131	0.021	372	47	168.6	6.4	1880	300	44.3	153000	118.7	<96	8.9	0.5	26.7	235.4	436000	0.533	0.5	7.1	0.119	13.5	0.126	0.86	1.17	0.56	5.11	1.48	18.86	6.86	36.7	7.8	77.9	17.15	10560	0.177
AM18	CORE	AM18 CORE	190503	190503_576_LC761	LC761	30	10	3.5
AM18	RIM	AM18 RIM	190503	190503_577_LC762	LC762	30	10	3.5	0.177	0.028	0.0269	0.001	0.30589	0.0483	0.0083	165	24	170.9	6.4	60	330	23	153000	67	220	2.99	3.08	20	175	436000	0.369	1.5	2	0.212	10.55	0.066	0.92	0.6	0.319	2.61	0.95	11.1	4.63	25.6	6.43	80.6	22	10800	0.072
AM18	CORE	AM18 CORE	190503	190503_578_LC763	LC763	30	10	3.5	0.207	0.02	0.02729	0.00067	0.13814	0.0565	0.0061	194	19	173.6	4.2	370	210	62	153000	41.8	<79	4.3	2.4	460	260	458000	0.255	1.67	11.8	0.134	11	0.1	1.16	1.59	0.7	6	1.49	18	7	38.5	9.4	105	26	11100	0.052
AM18	RIM	AM18 RIM	190503	190503_579_LC764	LC764	30	10	3.5	0.286	0.03	0.0278	0.00082	0.31061	0.0725	0.0065	253	23	176.7	5.1	930	190	720	153000	46.4	1280	7.1	37	1320	340	473000	0.6	0.73	2.06	0.16	18.9	0.086	0.98	1.31	0.83	6.8	1.99	24.9	9.6	50.9	12.8	149	34	10640	0.108
AM18	CORE	AM18 CORE	190503	190503_581_LC765	LC765	30	10	3.5	0.191	0.014	0.02672	0.00076	0.32026	0.0517	0.0036	177	12	170	4.8	240	150	0.99	153000	37.1	<63	2.43	0.51	45	219	470000	0.234	0.83	0.7	0.0106	9.07	0.0285	0.46	0.95	0.47	4.29	1.23	14.9	6.05	33.4	8.19	101	26.8	11390	0.0374
AM18	RIM	AM18 RIM	190503	190503_582_LC766	LC766	30	10	3.5
AM18	CORE	AM18 CORE	190503	190503_583_LC767	LC767	30	10	3.5	0.273	0.055	0.0292	0.0021	0.9125	0.0639	0.0074	240	40	186	13	700	240	40	153000	74	180	5.1	1.9	73	598	483000	0.477	0.94	1.27	0.12	20.4	0.231	2.66	4.24	1.58	16.2	4.13	50	17.2	88.1	19.9	210	44.7	10390	0.256
AM18	RIM	AM18 RIM	190503	190503_584_LC768	LC768	30	10	3.5	0.215	0.061	0.0267	0.0021	0.38789	0.058	0.016	191	50	170	13	230	500	232	153000	380	1900	14.2	9.6	650	904	459000	2.37	2	5.6	0.43	39.8	0.2	0.99	2.6	1.35	17.7	4.28	64.5	25.6	135	29.7	288	65.2	9280	0.31
AM18	CORE	AM18 CORE	190503	190503_586_LC769	LC769	30	10	3.5	0.1759	0.0079	0.02462	0.00058	0.44725	0.0518	0.0021	164.4	6.8	156.8	3.7	262	89	7.2	153000	44.8	<70	2.59	1.44	20.3	639	488000	0.63	1.13	1.39	0.092	37.4	0.196	2.06	2.53	1.18	11.51	2.98	38.6	15.9	93.6	23.4	295	84.9	13750	0.127
AM18	CORE	AM18 CORE	190503	190503_587_LC770	LC770	30	10	3.5	0.187	0.011	0.02677	0.00096	0.49043	0.052	0.0031	174.2	9.1	170.3	6	260	130	14.3	153000	89	<74	5.13	1.52	36.4	843	471000	0.61	1.8	2.84	0.049	23.8	0.139	3.04	5.57	1.42	23.8	6.32	73.5	25	119.7	25.9	251	48.9	11470	0.268
AM18	RIM	AM18 RIM	190503	190503_588_LC771	LC771	30	10	3.5
AM18	CORE	AM18 CORE	190503	190503_589_LC772	LC772	30	10	3.5	0.181	0.017	0.02712	0.00081	0.3195	0.0487	0.0053	168	15	172.5	5.1	100	210	3.5	153000	38.7	<68	3.1	0.86	11	237	480000	0.261	1.06	5.4	0.051	10.3	0.042	0.66	1.05	0.56	4.55	1.23	15.6	6.24	36.5	8.86	106.6	27.5	11390	0.058
AM18	RIM	AM18 RIM	190503	190503_591_LC773	LC773	30	10	3.5	0.19	0.038	0.0274	0.0021	0.027999	0.0521	0.0073	189	18	174	13	460	250	31.4	153000	106	220	3.17	5.9	50	331	429000	0.42	0.71	3.8	0.285	16.5	0.108	0.97	1.33	0.62	7.2	1.73	21.3	8.2	46.7	11	122	32.2	9700	0.041
AM18	CORE	AM18 CORE	190503	190503_592_LC774	LC774	30	10	3.5
AM18	RIM	AM18 RIM	190503	190503_593_LC775	LC775	30	10	3.5	0.194	0.019	0.0261	0.0013	0.20526	0.0545	0.0055	179	16	166	8	320	210	1.15	153000	35.2	<66	2.26	0.088	<3.6	152	484000	0.261	0.45	0.062	0.0103	8.2	0.0165	0.24	0.45	0.215	2.31	0.69	9.3	3.88	22.9	6.4	84	23	11960	0.069
AM18	CORE	AM18 CORE	190503	190503_594_LC776	LC776	30	10	3.5	0.186	0.012	0.02469	0.00073	0.057716	0.0537	0.0032	172.7	9.9	157.2	4.6	370	150	75	153000	53	<73	4.6	3.8	262	555	472000	0.56	1.69	15.3	0.179	36.6	0.183	2.16	2.3	1.02	9.9	2.73	32.8	13.4	77.2	19.3	237	64.5	13670	0.129
AM18	CORE	AM18 CORE	190503	190503_596_LC777	LC777	30	10	3.5
AM18	CORE	AM18 CORE	190503	190503_597_LC778	LC778	30	10	3.5
AM18	CORE	AM18 CORE	190503	190503_598_LC779	LC779	30	10	3.5	0.201	0.015	0.02532	0.00046	0.25552	0.0574	0.0041	185	12	161.2	2.9	460	150	136	153000	65.8	142	3.18	2.33	440	206	448000	0.351	0.89	4.54	0.78	15.7	0.198	0.9	0.76	0.417	3.59	1.05	13.61	5.38	31.6	7.7	93.3	26.6	12010	0.066
AM18	CORE	AM18 CORE	190503	190503_599_LC780	LC780	30	10	3.5	0.183	0.015	0.025	0.0014	0.21267	0.0539	0.005	171	13	159.3	9	340	210	11	153000	94	<85	5.3	0.13	<5.6	777	499000	1.13	0.49	<0.083	0.129	33	0.099	1.6	3.15	1.49	15.9	4.57	59.2	23.6	126	29.1	300	62.3	10770	0.233
AM18	CORE	AM18 CORE	190503	190503_606_LC781	LC781	30	10	3.5	0.24	0.024	0.02627	0.00088	0.74893	0.0676	0.0066	218	19	167.2	5.5	790	180	185	153000	32	141	3.9	4.8	1620	149.9	421000	0.277	1.57	5.3	0.37	7.95	0.057	0.25	0.36	0.189	1.91	0.642	7.2	3.66	23.4	6.55	92	29.6	12300	0.041
AM18	RIM	AM18 RIM	190503	190503_607_LC782	LC782	30	10	3.5	0.1891	0.0096	0.02553	0.00088	0.073617	0.0537	0.0031	175.6	8.2	162.5	5.5	330	130	19	153000	26.3	<79	2.83	2.4	940	188	466000	0.384	4.7	3.3	0.162	13.2	0.039	0.23	0.43	0.201	2.36	0.666	9.42	4.51	29	8.29	110.9	35.7	13730	0.072
AM18	CORE	AM18 CORE	190503	190503_608_LC783	LC783	30	10	3.5	0.227	0.014	0.02539	0.00042	0.018467	0.0643	0.004	207	11	161.6	2.7	680	130	39	153000	155	370	4.15	11.5	220	310	430000	0.535	5.3	1.25	0.359	23.5	0.102	0.83	1.36	0.61	5.87	1.59	19.6	7.85	45.2	11.05	129.8	34.8	10980	0.119
AM18	CORE	AM18 CORE	190503	190503_609_LC784	LC784	30	10	3.5	0.22	0.016	0.02628	0.00045	0.059714	0.0606	0.0045	201	14	167.2	2.9	530	160	58	153000	39.9	<54	3.59	0.3	10.1	294	462000	0.271	0.84	0.71	0.082	10.68	0.077	0.98	1.59	0.756	6.33	1.75	21.1	8.05	44.5	10.44	116.4	30	11250	0.064
AM18	RIM	AM18 RIM	190503	190503_611_LC785	LC785	30	10	3.5	0.1925	0.0096	0.0264	0.00057	0.14058	0.0529	0.0027	178.3	8.1	168	3.6	280	110	3.7	153000	41.2	<66	2.72	0.82	7.7	325	444000	0.588	1.83	1.41	0.057	25.2	0.0362	0.46	0.74	0.368	4.04	1.226	17.53	7.55	47.6	12.13	150	41.6	11550	0.089
AM18	CORE	AM18 CORE	190503	190503_612_LC786	LC786	30	10	3.5	0.177	0.012	0.02619	0.00041	0.047375	0.0491	0.0034	165	11	166.6	2.6	140	130	19	153000	86.6	<56	4.32	0.187	4.4	484	467500	0.455	0.64	0.14	0.0214	15.9	0.08	1.44	2.73	0.966	12.2	3.37	39.8	14.3	73.4	16.3	165	37.5	11030	0.143
AM18	RIM	AM18 RIM	190503	190503_613_LC787	LC787	30	10	3.5
AM18	CORE	AM18 CORE	190503	190503_614_LC788	LC788	30	10	3.5	0.204	0.018	0.02577	0.00088	0.24982	0.057	0.0051	187	15	164	5.5	400	180	17	153000	60	120	3.23	1.9	460	283	425000	0.26	1.78	0.94	0.148	11.8	0.115	1.1	1.63	0.71	6.24	1.69	19.1	7.44	40.2	9.38	111	29	10810	0.067
AM18	RIM	AM18 RIM	190503	190503_616_LC789	LC789	30	10	3.5
AM18	CORE	AM18 CORE	190503	190503_617_LC790	LC790	30	10	3.5
AM18	CORE	AM18 CORE	190503	190503_618_LC791	LC791	30	10	3.5	0.162	0.022	0.0263	0.00086	0.41856	0.0443	0.0053	152	19	167.3	5.4	-80	230	<0.43	153000	40.5	<89	2.27	<0.06	<5.3	216	471000	0.284	0.62	<0.069	<0.0055	8.73	0.026	0.46	0.9	0.368	3.79	1.15	14.1	5.7	33.9	7.97	94.3	24.87	11720	0.062
AM18	RIM	AM18 RIM	190503	190503_619_LC792	LC792	30	10	3.5	0.239	0.029	0.02582	0.00067	0.45338	0.0658	0.0073	216	23	164.3	4.2	690	220	690	153000	70	240	10.6	9	1360	256.4	430000	0.462	2.07	6.1	0.373	14.57	0.125	0.69	0.8	0.38	3.74	1.126	15.1	6.41	38.8	9.4	110.4	30.5	10200	0.068
AM18	CORE	AM18 CORE	190503	190503_621_LC793	LC793	30	10	3.5	0.191	0.013	0.0262	0.00064	0.10272	0.0531	0.0038	177	11	166.7	4	280	150	0.33	153000	43.9	<58	2.47	0.061	<3.9	306	468000	0.263	0.56	<0.054	0.0134	10.4	0.064	0.7	1.56	0.74	6.4	1.64	19.8	8	45.9	11.8	140	37.5	11020	0.053
AM18	RIM	AM18 RIM	190503	190503_622_LC794	LC794	30	10	3.5
AM18	CORE	AM18 CORE	190503	190503_623_LC795	LC795	30	10	3.5	0.182	0.011	0.02585	0.00053	0.0054213	0.0512	0.0032	169.7	9.1	164.5	3.3	220	130	0.44	153000	43.2	<59	2.86	0.088	<3.8	200.9	468000	0.349	0.566	<0.065	<0.0036	10.82	0.0127	0.294	0.67	0.292	3.68	1.158	14.92	5.66	32.4	7.62	86.4	20.87	11930	0.136
AM18	RIM	AM18 RIM	190503	190503_624_LC796	LC796	30	10	3.5	0.18	0.014	0.02522	0.00098	0.51129	0.0529	0.0029	172	10	160.5	6.1	300	120	5.9	153000	35.7	<60	2.68	0.41	25	254	482000	0.6	0.86	0.35	0.158	25.3	0.064	0.47	0.48	0.225	3.34	0.94	13	5.7	37.8	10.1	135	41.7	14470	0.132
AM18	CORE	AM18 CORE	190503	190503_626_LC797	LC797	30	10	3.5	0.195	0.024	0.0243	0.00093	0.75227	0.0557	0.0029	179	19	154.8	5.8	420	120	132	153000	101	170	9	5.3	448	504	438000	1.06	1.36	4.4	0.25	39.9	0.119	1.35	0.68	0.513	5.56	1.76	25	10.82	70.8	17.8	221	62.5	12550	0.198
AM18	CORE	AM18 CORE	190503	190503_627_LC798	LC798	30	10	3.5	0.245	0.048	0.02671	0.00094	0.11286	0.066	0.013	219	39	169.9	5.9	640	400	79	153000	67	<110	3.56	3.23	91	257	489000	0.449	1.26	1.92	0.121	13.3	0.042	0.49	0.67	0.428	4.03	1.17	15.3	6.67	39.8	9.7	117	33	11770	0.088
AM18	CORE	AM18 CORE	190503	190503_628_LC799	LC799	30	10	3.5	0.177	0.018	0.025	0.0018	0.53029	0.0513	0.005	165	15	159	11	220	200	77	153000	24	<83	1.89	2.2	150	167	484000	0.278	0.78	2.7	0.28	11.4	0.057	0.39	0.36	0.177	2.2	0.598	8.7	3.82	26.5	7.2	102	31.7	12630	0.048
AM18	RIM	AM18 RIM	190503	190503_629_LC800	LC800	30	10	3.5
AM18	CORE	AM18 CORE	190503	190503_636_LC801	LC801	30	10	3.5	0.201	0.021	0.0251	0.0012	0.84888	0.0574	0.0036	190	19	159.8	7.6	460	130	88	153000	36	<79	8.1	6	440	361	418000	0.47	1.84	2.6	0.35	28.1	0.173	1.43	1.5	0.561	5.32	1.48	18.6	7.9	49.9	13.5	177	55.1	14710	0.116
AM18	CORE	AM18 CORE	190503	190503_637_LC802	LC802	30	10	3.5
AM18	CORE	AM18 CORE	190503	190503_638_LC803	LC803	30	10	3.5
AM18	RIM	AM18 RIM	190503	190503_639_LC804	LC804	30	10	3.5	0.184	0.013	0.02545	0.00065	0.059941	0.0522	0.004	171	11	162	4.1	250	160	6.1	153000	49	<71	2.95	0.84	30.3	181.2	478000	0.353	0.77	0.64	0.061	16.34	0.0347	0.5	0.49	0.35	3	0.93	11.04	4.72	27.8	6.88	82.6	22.3	12040	0.098
AM18	CORE	AM18 CORE	190503	190503_641_LC805	LC805	30	10	3.5	0.23	0.036	0.0257	0.0012	0.30433	0.0649	0.0098	210	30	163.5	7.3	730	340	100	153000	17	<110	2.75	0.78	553	196	520000	0.212	1.35	1.2	0.34	10.51	0.117	0.87	0.92	0.58	3.71	0.88	12	5.28	30.9	8.03	103.8	28.9	13670	0.089
AM18	RIM	AM18 RIM	190503	190503_642_LC806	LC806	30	10	3.5
AM4	CORE	AM4 CORE	190503	190503_643_LC807	LC807	30	10	3.5
AM4	RIM	AM4 RIM	190503	190503_644_LC808	LC808	30	10	3.5	0.1751	0.0093	0.02581	0.00049	0.092106	0.0492	0.0029	163.4	8	164.3	3.1	120	120	1.28	153000	223.8	<60	12.24	0.561	<3.6	1111	455000	0.987	0.526	<0.051	0.0381	22.3	0.326	4.5	7.33	1.86	32.2	8.75	102.2	34.4	165	33.1	315	63.6	10050	0.382
AM4	CORE	AM4 CORE	190503	190503_646_LC809	LC809	30	10	3.5	0.179	0.017	0.02619	0.00094	0.26466	0.0494	0.0047	166	15	166.6	5.9	130	200	<0.35	153000	145	<64	7.7	0.468	<4.1	760	471000	0.587	0.49	<0.092	0.0047	18.4	0.134	2.44	5.1	1.24	21	5.92	70	24.8	119	25.5	243	49.6	11990	0.278
AM4	RIM	AM4 RIM	190503	190503_647_LC810	LC810	30	10	3.5
AM4	CORE	AM4 CORE	190503	190503_648_LC811	LC811	30	10	3.5	0.188	0.016	0.02643	0.00059	0.15516	0.0516	0.0044	174	14	168.1	3.7	220	170	1.21	153000	154.1	<58	9.64	0.302	<3.8	370	460000	0.655	0.667	<0.069	<0.0027	14.44	0.0394	0.79	1.72	0.492	8.45	2.58	32.1	11.15	56.4	12.1	123.2	25.31	10650	0.226
AM4	RIM	AM4 RIM	190503	190503_649_LC812	LC812	30	10	3.5	0.175	0.012	0.02632	0.00065	0.028384	0.0483	0.0035	164	10	167.5	4.1	100	150	0.4	153000	123.3	<66	6.17	0.334	<4.2	451	461000	1.091	0.56	<0.059	0.012	20.7	0.0279	0.56	1.51	0.452	8.8	2.92	35.3	13.4	68.7	15.5	154	31.5	12170	0.423
AM4	CORE	AM4 CORE	190503	190503_651_LC813	LC813	30	10	3.5	0.191	0.012	0.02725	0.00054	0.03565	0.0509	0.0034	179	11	173.3	3.4	220	150	3.12	153000	155.2	<58	9.7	0.39	<4.1	510	447000	0.526	0.565	<0.046	0.0084	14.96	0.077	1.31	3.12	0.75	13.7	3.84	44.1	15.3	75.6	16	153	31.8	11100	0.239
AM4	RIM	AM4 RIM	190503	190503_652_LC814	LC814	30	10	3.5	0.298	0.059	0.0277	0.0015	0.79965	0.074	0.011	255	43	176.1	9.5	850	290	990	153000	132	90	31	0.9	28.2	477	431000	0.6	0.61	4.4	0.114	15	0.113	1.71	2.86	0.79	12.9	3.65	41.1	14.2	69.8	14.7	142	30	10650	0.218
AM4	CORE	AM4 CORE	190503	190503_653_LC815	LC815	30	10	3.5
AM4	CORE	AM4 CORE	190503	190503_654_LC816	LC816	30	10	3.5	0.198	0.017	0.02645	0.00059	0.3445	0.0549	0.0047	185	15	168.3	3.7	310	170	261	153000	190.8	<54	15.9	0.667	8.6	432	443400	0.482	0.63	1.69	0.108	13.25	0.08	1.49	2.54	0.646	10.77	3.15	37.5	13	65.2	13.58	134.2	28.43	9220	0.184
AM4	RIM	AM4 RIM	190503	190503_656_LC817	LC817	30	10	3.5	0.184	0.012	0.02615	0.00049	0.079256	0.0514	0.0035	171	11	166.4	3	210	140	1.11	153000	136.6	<55	7.34	0.324	<3.9	402	457300	0.87	0.574	<0.051	0.0055	18.08	0.0282	0.54	1.63	0.418	8.04	2.54	31.8	11.74	61.3	13.62	135.9	29.1	11570	0.344
AM4	CORE	AM4 CORE	190503	190503_657_LC818	LC818	30	10	3.5
AM4	CORE	AM4 CORE	190503	190503_658_LC819	LC819	30	10	3.5	0.246	0.018	0.02771	0.00066	0.35083	0.0641	0.0045	222	15	176.2	4.2	690	150	182	153000	160.9	<50	11.43	0.915	<3.7	576	448900	0.515	0.67	1.48	0.0188	14.72	0.131	1.97	3.8	1.003	16.4	4.57	52.2	17.78	85.8	17.45	168.7	34.1	10050	0.188
AM4	RIM	AM4 RIM	190503	190503_659_LC820	LC820	30	10	3.5	0.183	0.011	0.02694	0.00051	0.11187	0.0494	0.0031	170.2	9.7	171.3	3.2	130	130	1.54	153000	127.5	<55	6.63	0.308	<3.7	398.3	452000	0.982	0.532	<0.069	0.0075	20.61	0.0317	0.61	1.49	0.375	8.02	2.578	32.33	11.83	62.7	13.75	139.5	29.77	12170	0.389
AM4	CORE	AM4 CORE	190503	190503_666_LC821	LC821	30	10	3.5
AM4	CORE	AM4 CORE	190503	190503_667_LC822	LC822	30	10	3.5	0.182	0.012	0.02717	0.00074	0.24107	0.0489	0.0035	169	11	172.8	4.7	140	150	2.48	153000	114	<56	9.17	0.266	<4	344	451000	0.393	0.564	<0.034	<0.0035	10.73	0.046	1.19	2.11	0.59	9.1	2.54	30	10.6	53.5	11.2	111	24	10490	0.165
AM4	RIM	AM4 RIM	190503	190503_668_LC823	LC823	30	10	3.5	0.193	0.013	0.02714	0.00071	0.12929	0.0518	0.0038	178	11	172.6	4.5	230	160	3.3	153000	92.7	<59	3.88	0.439	6.8	361	442900	1.02	0.54	<0.096	0.037	21.34	0.049	0.86	1.36	0.362	6.9	2.08	27.5	10.6	57.6	12.77	132.4	29.95	12420	0.409
AM4	CORE	AM4 CORE	190503	190503_669_LC824	LC824	30	10	3.5	0.18	0.019	0.02763	0.00083	0.055009	0.0475	0.0053	167	17	175.7	5.2	50	220	0.87	153000	153.7	<61	7.55	0.354	<4.3	510	480000	0.628	0.61	<0.054	0.0063	12.91	0.053	0.94	2.3	0.617	11.91	3.46	43.3	15.13	77.5	16.74	168.4	34.67	11310	0.233
AM4	RIM	AM4 RIM	190503	190503_671_LC825	LC825	30	10	3.5
AM4	CORE	AM4 CORE	190503	190503_672_LC826	LC826	30	10	3.5	0.189	0.021	0.0269	0.0012	0.025487	0.0513	0.0062	175	18	171.2	7.6	190	250	2.92	153000	184	<74	11.7	0.34	<4.2	794	480000	0.503	0.53	<0.066	0.0164	16.4	0.172	3.32	6.55	1.47	24.2	6.38	72.4	24.2	116.4	23.4	227	45.4	10520	0.212
AM4	RIM	AM4 RIM	190503	190503_673_LC827	LC827	30	10	3.5	0.178	0.014	0.02673	0.0006	0.0039206	0.0486	0.004	166	12	170	3.8	80	160	12.6	153000	143.6	<67	9.05	0.5	17.8	431	450000	0.633	0.65	0.086	0.0143	14.2	0.0398	0.63	2.02	0.537	9.23	2.82	35.6	12.8	66	14.15	142.7	29.81	10720	0.245
AM4	CORE	AM4 CORE	190503	190503_674_LC828	LC828	30	10	3.5	0.176	0.013	0.0254	0.00059	0.028888	0.0505	0.0039	164	11	161.7	3.7	160	150	14.2	153000	126.9	66	6.65	0.51	17.6	389.1	464700	0.613	0.6	0.27	0.053	15	0.0455	0.75	1.51	0.488	8.54	2.464	30.9	11.5	59.4	12.87	132.3	28.79	11330	0.235
AM4	CORE	AM4 CORE	190503	190503_676_LC829	LC829	30	10	3.5	0.207	0.026	0.0273	0.0015	0.8046	0.0543	0.0052	190	22	173.8	9.1	310	190	24	153000	106	210	8	4.1	55	303	416000	0.431	0.81	1.05	0.072	11.06	0.052	0.79	1.2	0.416	6.5	1.91	23.7	8.6	46.4	10	107	24.2	10830	0.141
AM4	RIM	AM4 RIM	190503	190503_677_LC830	LC830	30	10	3.5	0.176	0.013	0.02629	0.00074	0.16996	0.0483	0.0034	163	11	167.3	4.6	80	140	15.4	153000	87.3	115	6.39	1.05	41	203	445000	0.361	0.57	0.52	0.056	8.83	0.032	0.43	0.9	0.245	4.11	1.23	15.6	5.85	31.8	7.52	83	20.58	11760	0.138
AM4	CORE	AM4 CORE	190503	190503_678_LC831	LC831	30	10	3.5	0.187	0.021	0.02725	0.0008	0.042325	0.0499	0.0056	173	17	173.3	5	130	220	82	153000	128	<65	8.65	0.81	7.8	640	453000	0.534	0.526	0.29	0.0173	16.04	0.054	1.37	2.74	0.86	15.1	4.54	55.5	19.4	94	19.7	192.6	38.3	10810	0.208
AM4	RIM	AM4 RIM	190503	190503_679_LC832	LC832	30	10	3.5	0.171	0.011	0.02422	0.00042	0.15639	0.051	0.0032	159.9	9.3	154.2	2.6	220	130	17.1	153000	45.8	<82	3.74	0.352	459	134	466000	0.345	0.66	0.73	0.067	8.32	0.029	0.32	0.36	0.086	1.84	0.62	8.4	3.59	21.5	5.56	68.6	19.15	14540	0.175
AM4	CORE	AM4 CORE	190503	190503_681_LC833	LC833	30	10	3.5	0.173	0.012	0.02393	0.00055	0.16812	0.0524	0.0035	162	10	152.4	3.5	270	140	18.3	153000	79	106	17.8	0.58	26.2	282.5	466000	0.585	0.68	0.37	0.047	14.4	0.045	0.51	0.8	0.306	4.37	1.39	18	7.4	44.6	11.18	143	39.2	12690	0.214
AM4	RIM	AM4 RIM	190503	190503_682_LC834	LC834	30	10	3.5	0.1706	0.0087	0.02375	0.00071	0.47786	0.0519	0.0024	159.7	7.6	151.3	4.5	270	100	15.4	153000	89.4	<97	5	1.81	21.6	427	476000	0.845	0.73	1.05	0.169	22.5	0.115	0.96	1.27	0.411	6.05	1.81	25.4	10.47	64.7	17.46	219	61.6	13070	0.347
AM4	CORE	AM4 CORE	190503	190503_683_LC835	LC835	30	10	3.5	0.176	0.013	0.02682	0.00062	0.29645	0.0475	0.0034	164	12	170.6	3.9	50	150	18.5	153000	166	120	8.22	1.07	<3.6	497	469300	0.705	0.531	0.078	0.41	19	0.16	1.38	2.23	0.576	10.96	3.33	40.7	14.82	75.2	15.86	156	32.8	11360	0.258
AM4	RIM	AM4 RIM	190503	190503_684_LC836	LC836	30	10	3.5	0.217	0.021	0.02664	0.00065	0.5698	0.0585	0.0049	198	17	169.5	4.1	470	180	380	153000	120.9	<63	13	0.401	13.5	328	465600	0.745	0.68	2.12	0.186	15.47	0.055	0.65	1.22	0.339	6.29	2.05	25.8	9.57	50.2	10.91	114.7	24.6	11990	0.286
AM4	CORE	AM4 CORE	190503	190503_686_LC837	LC837	30	10	3.5	0.186	0.012	0.02628	0.00059	0.19324	0.0527	0.0042	173	11	167.2	3.7	260	150	11.7	153000	189	<72	8.41	0.77	21.7	1490	451600	1.3	0.61	0.23	0.0332	35.2	0.252	4.59	9.3	2.65	44.4	12.1	140	46	212	41.6	389	75.1	9680	0.35
AM4	RIM	AM4 RIM	190503	190503_687_LC838	LC838	30	10	3.5	0.192	0.013	0.02769	0.00071	0.31718	0.0504	0.0031	178	11	176	4.5	170	130	21	153000	137.5	<64	7.85	0.86	18	435	443000	0.751	0.64	0.2	0.028	16.22	0.042	0.7	1.5	0.489	8.65	2.69	34.4	12.77	65.3	14.17	145.5	31.1	10650	0.287
AM4	CORE	AM4 CORE	190503	190503_688_LC839	LC839	30	10	3.5	0.183	0.011	0.02652	0.00079	0.60749	0.0497	0.0025	169.9	9.7	168.7	5	170	110	1.28	153000	71.5	<65	4.59	0.38	11.5	277	473000	0.559	0.52	0.206	0.091	14.66	0.066	0.79	1.08	0.271	4.8	1.56	19.7	7.62	43.8	10.39	120	29.9	13580	0.207
AM4	RIM	AM4 RIM	190503	190503_689_LC840	LC840	30	10	3.5	0.1744	0.0081	0.02455	0.00052	0.40343	0.0514	0.0022	163.1	7	156.3	3.3	240	95	9.5	153000	60.9	<78	4.8	0.269	16.7	327	457100	0.499	0.6	0.34	0.056	16	0.061	0.4	0.84	0.247	4.28	1.35	19.4	8.2	50.2	13.1	159	43.5	14080	0.182
AM4	CORE	AM4 CORE	190503	190503_696_LC841	LC841	30	10	3.5
AM4	RIM	AM4 RIM	190503	190503_697_LC842	LC842	30	10	3.5	0.183	0.021	0.0269	0.001	0.17392	0.0498	0.0065	170	18	171.3	6.5	140	270	1.31	153000	145	<80	9.37	0.582	<4.9	399	467000	0.582	0.5	<0.11	<0.0038	12.67	0.037	0.72	1.65	0.459	9.12	2.84	33.4	11.72	59.4	12.05	117.2	25.24	10760	0.202
AM4	CORE	AM4 CORE	190503	190503_698_LC843	LC843	30	10	3.5	0.206	0.032	0.0261	0.0011	0.072156	0.0579	0.0094	187	27	166.1	7.1	360	340	3.4	153000	93.6	<61	8.1	0.72	8	252	462000	0.356	1.03	0.36	0.021	10.21	0.0114	0.44	0.93	0.233	4.56	1.53	19.1	7.32	39.9	8.78	89.5	19.9	11390	0.171
AM4	RIM	AM4 RIM	190503	190503_699_LC844	LC844	30	10	3.5	0.192	0.027	0.02729	0.00056	0.16113	0.0509	0.0075	177	23	173.6	3.5	180	290	4.2	153000	174	<92	9.6	0.54	<5.3	707	478000	0.668	0.68	<0.074	0.0196	15.49	0.176	2.75	4.12	1.16	17.7	5.21	62.1	21.9	107	21.4	206	44.2	11080	0.28
AM4	CORE	AM4 CORE	190503	190503_701_LC845	LC845	30	10	3.5
AM4	RIM	AM4 RIM	190503	190503_702_LC846	LC846	30	10	3.5	0.191	0.021	0.02629	0.00099	0.22011	0.0526	0.0054	176	17	167.3	6.2	240	200	1.06	153000	114.4	<66	5.91	0.51	5.8	790	465000	0.8	0.68	<0.063	0.042	30.1	0.166	2.21	3.32	1.04	16.3	4.95	61.7	23.2	119	27.5	326	76	11880	0.333
AM4	CORE	AM4 CORE	190503	190503_703_LC847	LC847	30	10	3.5	0.232	0.047	0.0273	0.0012	0.22631	0.062	0.013	208	37	173.3	7.7	570	400	56.2	153000	130	<130	7.8	1.14	115	328.8	445000	0.524	0.71	0.55	0.059	13.59	0.045	0.87	1.39	0.362	6.93	2.12	25.6	9.69	50.7	11.18	115.7	25.5	11290	0.218
AM4	CORE	AM4 CORE	190503	190503_704_LC848	LC848	30	10	3.5	0.302	0.051	0.0317	0.003	0.47327	0.069	0.01	266	40	201	19	830	300	19.8	153000	112	<150	46	1.36	29	437	440000	0.88	0.63	1.18	0.43	17.2	0.35	0.78	1.04	0.47	8	2.54	32.1	11.9	64.7	14.1	147	31.8	10800	0.335
AM4	CORE	AM4 CORE	190503	190503_706_LC849	LC849	30	10	3.5	0.183	0.013	0.02534	0.00049	0.33632	0.052	0.0035	170	11	161.3	3.1	260	150	47	153000	137.5	102	8.6	0.533	61	597	466000	1.021	0.64	0.57	0.065	20.82	0.11	1.44	2.63	0.89	12.1	3.63	45.8	16.8	90.5	20.44	213.8	49.5	11940	0.446
AM4	RIM	AM4 RIM	190503	190503_707_LC850	LC850	30	10	3.5	0.178	0.014	0.02631	0.00066	0.48918	0.0501	0.0035	166	12	167.4	4.1	180	150	8	153000	141.4	<78	6.9	0.297	14.8	620	471000	1.022	0.59	0.16	0.041	21.2	0.097	1.69	3.25	1.04	14	4.08	50	17.9	95.8	22.3	237	49.2	11790	0.5
AM4	CORE	AM4 CORE	190503	190503_708_LC851	LC851	30	10	3.5	0.183	0.013	0.02547	0.00091	0.44869	0.0519	0.0031	170	11	162.1	5.7	250	130	6.8	153000	92	<63	4.48	0.79	7.8	651	474000	0.663	0.77	0.17	0.0532	21.2	0.11	1.91	3.53	1.04	14.4	4.19	50.3	18.4	96.3	21.7	237	54.1	12690	0.293
AM4	RIM	AM4 RIM	190503	190503_709_LC852	LC852	30	10	3.5	0.188	0.017	0.0262	0.0013	0.95071	0.0497	0.002	174	14	166.8	7.9	190	97	7.3	153000	133	97	5	0.35	11	660	437000	1.3	0.56	<0.07	0.65	29.8	0.336	3.25	2.84	0.94	12.7	3.79	48	18.5	99	24	272	68	11250	0.408
AM4	CORE	AM4 CORE	190503	190503_711_LC853	LC853	30	10	3.5	0.189	0.019	0.02625	0.00089	0.22533	0.0521	0.005	175	16	167	5.6	240	200	0.52	153000	176	<86	7.6	1.03	<5.2	1030	486000	1.1	0.55	<0.095	0.008	26.3	0.147	2.46	5.5	1.31	26	7.6	91	31.7	158	32.1	314	64.1	12080	0.447
AM4	CORE	AM4 CORE	190503	190503_712_LC854	LC854	30	10	3.5	0.302	0.028	0.0293	0.00099	0.41236	0.074	0.0062	264	22	186.2	6.2	950	180	162	153000	160	<58	9.7	2.45	6	647	453800	0.677	0.66	0.96	0.225	16.6	0.146	1.9	2.88	0.97	13.5	3.99	49.4	18.5	97.8	21.5	226	51.5	10770	0.258
AM4	RIM	AM4 RIM	190503	190503_713_LC855	LC855	30	10	3.5
AM4	CORE	AM4 CORE	190503	190503_714_LC856	LC856	30	10	3.5	0.231	0.02	0.0283	0.0019	0.36283	0.0598	0.005	210	16	180	12	590	150	180	153000	230	630	14.3	5	390	573	457000	0.443	3.7	3.1	0.78	16.7	0.29	1.66	2.91	0.81	12.9	3.94	44.6	16.3	82	18.5	188	43.4	11250	0.132
AM4	RIM	AM4 RIM	190503	190503_716_LC857	LC857	30	10	3.5	0.17	0.013	0.02424	0.00055	0.38175	0.0506	0.004	159	12	154.4	3.5	200	170	4.84	153000	70.3	<79	5.24	0.197	<4.6	279.1	481400	0.684	0.57	0.122	0.0099	15.04	0.0222	0.5	0.83	0.336	3.83	1.36	18.47	7.43	43.8	10.51	121.4	29.7	12800	0.285
AM4	CORE	AM4 CORE	190503	190503_717_LC858	LC858	30	10	3.5	0.205	0.021	0.02614	0.0006	0.12551	0.0567	0.0057	188	17	166.3	3.7	380	190	4.99	153000	174	<65	12.59	0.586	7.2	558	468600	0.505	0.553	0.049	0.045	14.75	0.178	2.52	3.82	0.96	15.2	4.23	49.5	16.7	81	16.79	160.8	34.1	10560	0.218
AM4	RIM	AM4 RIM	190503	190503_718_LC859	LC859	30	10	3.5	0.202	0.02	0.0252	0.00059	0.045226	0.0582	0.0058	185	16	160.4	3.7	410	200	16.3	153000	130.6	114	7.91	0.7	17.2	385.3	470300	0.816	0.62	0.46	0.082	16.85	0.0614	0.8	1.34	0.31	7.7	2.4	29.59	11.09	59.7	13.37	134.9	29.8	11950	0.324
AM4	CORE	AM4 CORE	190503	190503_719_LC860	LC860	30	10	3.5	0.197	0.014	0.02667	0.00047	0.29377	0.0535	0.0035	182	11	169.7	2.9	290	140	8.7	153000	164	<56	7.58	0.72	10.2	650	465100	0.563	0.568	0.31	0.035	15.4	0.086	1.37	3.09	0.94	16.1	4.8	56.6	19.9	100	20.4	198	41.6	11060	0.221
AM4	RIM	AM4 RIM	190503	190503_726_LC861	LC861	30	10	3.5	0.192	0.014	0.02677	0.00049	0.36346	0.0515	0.0037	177	12	170.3	3.1	210	150	112	153000	147.5	<64	9.3	0.256	4.6	492	457500	0.696	0.55	0.44	0.04	13.4	0.06	1.07	2.41	0.542	10.43	3.19	39.5	14.47	73.9	15.84	158.5	34	11430	0.279
AM4	CORE	AM4 CORE	190503	190503_727_LC862	LC862	30	10	3.5	0.187	0.013	0.02579	0.00061	0.092501	0.0525	0.0035	173	11	164.1	3.8	260	140	0.65	153000	144	<63	6.52	0.57	<3.9	807	472700	0.513	0.637	<0.015	0.0085	17.3	0.088	1.88	4.59	1.23	22	6.21	71.2	23.9	117	23.7	226	47.7	11710	0.204
AM4	RIM	AM4 RIM	190503	190503_728_LC863	LC863	30	10	3.5	0.189	0.016	0.0257	0.0014	0.82763	0.0537	0.0036	175	13	163.3	8.7	310	140	83	153000	77	140	17.7	2.54	109	301	441000	0.299	0.54	0.59	0.77	23.1	0.231	1.11	1.19	0.429	6.7	1.87	23.1	8.6	44.4	9.8	102	24.7	12220	0.092
AM4	CORE	AM4 CORE	190503	190503_729_LC864	LC864	30	10	3.5	0.237	0.032	0.02735	0.00087	0.2207	0.0605	0.0067	214	25	173.9	5.4	580	240	35	153000	300	500	6.32	0.4	56	373	457000	0.623	0.68	0.45	0.105	13.8	0.065	0.62	1.27	0.444	7	2.15	27.6	10.5	57.2	13	134	30.3	11360	0.257
AM18	CORE	AM18 CORE	190503	190503_731_LC865	LC865	30	10	3.5	0.17	0.012	0.02571	0.00072	0.25253	0.048	0.0032	159	10	163.6	4.5	90	140	1.4	153000	52.2	<59	2.3	0.071	<4	398	492000	0.357	0.66	0.11	0.023	16	0.104	1.56	2.09	0.93	8.83	2.2	28	10.48	58	13.66	157.3	41.3	12420	0.072
AM18	RIM	AM18 RIM	190503	190503_732_LC866	LC866	30	10	3.5
AM18	CORE	AM18 CORE	190503	190503_733_LC867	LC867	30	10	3.5	0.214	0.024	0.02843	0.0006	0.03296	0.0547	0.0062	196	20	180.7	3.7	320	230	5.4	153000	54.4	<60	2.44	0.053	10.6	269	482000	0.275	0.69	0.24	0.0145	10.39	0.0505	0.99	1.16	0.592	5.85	1.57	19.3	7.41	42.2	9.74	108	27.58	11820	0.08
AM18	RIM	AM18 RIM	190503	190503_734_LC868	LC868	30	10	3.5	0.18	0.011	0.02561	0.00056	0.075477	0.0507	0.0033	167.8	9.6	163	3.5	220	140	20.9	153000	69	<93	2.99	0.203	65	373	432000	0.519	0.58	1.06	0.088	18.87	0.074	0.86	1.08	0.629	5.71	1.93	23.3	9.67	55.7	12.78	145.2	37	10290	0.081
AM18	CORE	AM18 CORE	190503	190503_736_LC869	LC869	30	10	3.5	0.204	0.027	0.0264	0.0011	0.62987	0.0544	0.0058	187	22	168.3	7.2	320	220	18	153000	37.7	<70	3.1	0.16	80	182	486000	0.231	0.54	0.08	0.015	8.36	0.021	0.28	0.49	0.319	2.9	0.793	10.7	4.59	28	7.36	91.4	26.1	12470	0.037
AM18	RIM	AM18 RIM	190503	190503_737_LC870	LC870	30	10	3.5	0.208	0.016	0.02684	0.00061	0.45169	0.0554	0.004	191	13	170.7	3.8	390	150	282	153000	68	350	12.4	2.19	2900	266.8	442000	0.335	0.89	4.8	0.274	12.23	0.128	1.47	1.05	1.11	5.8	1.44	16.77	6.82	39.1	9.6	112.2	30.6	10770	0.06
AM18	CORE	AM18 CORE	190503	190503_738_LC871	LC871	30	10	3.5
AM18	CORE	AM18 CORE	190503	190503_739_LC872	LC872	30	10	3.5	0.238	0.04	0.0262	0.0014	0.46347	0.0661	0.0095	215	32	166.8	9.1	740	270	2.37	153000	68.7	<93	3.27	0.168	11.9	680	542000	0.49	0.89	0.14	0.02	22.5	0.091	2.28	4.35	1.45	18.3	5.1	57	21.2	105	23.5	237	49.8	13030	0.357
AM18	RIM	AM18 RIM	190503	190503_741_LC873	LC873	30	10	3.5	0.259	0.044	0.0266	0.0014	0.22025	0.072	0.014	233	36	169.2	8.8	900	440	16.3	153000	51	<130	3.9	0.15	42	302	502000	0.369	0.77	0.83	0.042	14.1	0.043	0.79	0.74	0.53	5.12	1.63	18.91	7.97	48.7	11.5	126	31.3	12140	0.268
AM18	CORE	AM18 CORE	190503	190503_742_LC874	LC874	30	10	3.5	0.212	0.028	0.0284	0.0021	0.69626	0.0539	0.0047	194	23	181	13	340	200	15	153000	50	<81	3.13	0.26	140	228	499000	0.284	0.77	1.5	0.25	9.5	0.067	0.45	0.93	0.42	3.87	1.1	15.6	5.8	35.6	8.8	104	28.5	12430	0.062
AM18	RIM	AM18 RIM	190503	190503_743_LC875	LC875	30	10	3.5
AM18	CORE	AM18 CORE	190503	190503_744_LC876	LC876	30	10	3.5	0.202	0.02	0.0274	0.0011	0.020024	0.0524	0.005	185	17	174	6.6	280	210	670	153000	31.9	<65	9	0.19	254	93	466500	0.226	0.77	3.1	0.199	7.27	0.111	1.09	0.435	0.797	1.61	0.4	5.8	2.46	15	3.65	43.9	11.9	12380	0.044
AM18	RIM	AM18 RIM	190503	190503_746_LC877	LC877	30	10	3.5	0.228	0.02	0.02683	0.00093	0.50411	0.0616	0.0047	208	17	170.7	5.8	630	160	98	153000	68	97	7.7	1.1	290	374	498900	0.565	0.88	1.97	0.89	25.4	0.44	2.58	1.88	1.85	6.98	2.06	25.5	9.98	56.3	12.76	138.3	34.7	12100	0.118
AM18	CORE	AM18 CORE	190503	190503_747_LC878	LC878	30	10	3.5	0.194	0.02	0.02681	0.00087	0.070603	0.0528	0.0058	180	17	170.6	5.5	270	230	3.8	153000	118	<73	4.84	0.31	<4.9	723	465000	0.47	0.53	0.21	0.025	17.4	0.117	1.93	4.31	1.22	18.8	5.15	61.7	21.5	107.4	22.5	219	44.6	11310	0.194
AM18	RIM	AM18 RIM	190503	190503_748_LC879	LC879	30	10	3.5	0.217	0.03	0.0265	0.0017	0.20005	0.0597	0.0091	199	25	168	11	550	360	4	153000	88	<130	3.91	0.26	11	621	475000	0.47	0.64	0.32	0.024	17.4	0.08	1.48	3.45	1.16	14	4.2	51.2	18.3	92.7	20.4	201	43.1	11380	0.211
AM18	CORE	AM18 CORE	190503	190503_749_LC880	LC880	30	10	3.5
AM18	CORE	AM18 CORE	190503	190503_756_LC881	LC881	30	10	3.5
AM18	RIM	AM18 RIM	190503	190503_757_LC882	LC882	30	10	3.5
AM18	CORE	AM18 CORE	190503	190503_758_LC883	LC883	30	10	3.5	0.18	0.027	0.0274	0.0016	0.088298	0.0481	0.0092	168	24	175	10	90	400	<0.64	153000	15	<130	2.4	<0.099	<7.2	129.2	485000	0.167	0.66	<0.18	<0.013	4.94	<0.0088	<0.21	0.34	0.242	2.04	0.514	8.13	3.32	21.1	5.17	68.8	19.5	12130	0.039
AM18	RIM	AM18 RIM	190503	190503_759_LC884	LC884	30	10	3.5	0.186	0.018	0.02697	0.00091	0.42342	0.0508	0.0046	173	15	171.5	5.7	300	260	0.85	153000	41	<87	2.31	0.074	<5.2	297	505000	0.302	0.67	<0.085	0.008	12.1	0.052	0.94	1.17	0.65	5.19	1.52	19.9	7.62	46.1	11.3	128	33.3	11800	0.07
AM22	CORE	AM22 CORE	190503	190503_761_LC885	LC885	30	10	3.5	0.18	0.02	0.02501	0.00073	0.0086039	0.0525	0.0057	168	16	159.2	4.6	240	220	19.9	153000	90	<83	3.82	0.314	6.4	611	473000	0.507	0.87	5.1	0.037	19.3	0.103	1.85	3.74	1.13	16.8	4.45	51.1	18.05	92.1	18.83	190.7	41.2	11250	0.182
AM22	RIM	AM22 RIM	190503	190503_762_LC886	LC886	30	10	3.5	0.173	0.022	0.02451	0.00076	0.14773	0.0503	0.0066	160	20	156	4.8	310	200	28.9	153000	112	190	3.44	0.82	19	342	453000	0.501	0.72	13.4	0.072	16	0.081	0.79	1.47	0.567	7.46	2.02	24.6	9.58	50.8	11.4	124	29.6	10480	0.12
AM22	CORE	AM22 CORE	190503	190503_763_LC887	LC887	30	10	3.5	0.166	0.018	0.02513	0.0007	0.22325	0.0485	0.0059	155	16	160	4.4	60	230	12.1	153000	100	<79	4.61	0.362	11.1	304.7	452000	0.32	0.8	4.47	0.045	11.68	0.057	0.7	1.44	0.523	6.14	1.76	22.7	8.43	48.2	10.63	117	27.89	10950	0.114
AM22	CORE	AM22 CORE	190503	190503_764_LC888	LC888	30	10	3.5	0.19	0.013	0.02663	0.00079	0.30921	0.0519	0.0035	176	11	169.4	4.9	260	150	8.5	153000	75	<63	5.31	0.428	6.8	407	451000	0.302	0.584	1.41	0.022	12.47	0.08	1.49	2.3	0.862	10.46	2.85	32.7	11.9	60.6	13.21	137	31.7	10650	0.136
AM22	RIM	AM22 RIM	190503	190503_766_LC889	LC889	30	10	3.5	0.193	0.01	0.02497	0.00053	0.010372	0.0561	0.0028	178.5	8.5	159	3.3	420	110	14.9	153000	72.9	<72	3.94	0.33	15.3	299.8	456300	0.487	0.7	3.7	0.03	18.3	0.043	0.66	1.24	0.58	5.71	1.61	21.22	8.17	46.5	10.71	115.1	28.42	10740	0.112
AM22	CORE	AM22 CORE	190503	190503_767_LC890	LC890	30	10	3.5
AM22	RIM	AM22 RIM	190503	190503_768_LC891	LC891	30	10	3.5	0.173	0.011	0.02636	0.00046	0.21528	0.0476	0.003	161.7	9.6	167.7	2.9	70	130	<0.32	153000	67.1	<57	4.3	0.102	<3.2	439	482500	0.625	0.559	<0.056	0.005	19.87	0.0359	0.69	1.63	0.751	9.17	2.64	32.9	12.54	69.6	15.4	165.2	38.1	11310	0.211
AM22	CORE	AM22 CORE	190503	190503_769_LC892	LC892	30	10	3.5	0.194	0.016	0.02797	0.00079	0.26291	0.0503	0.0038	180	13	177.8	4.9	190	160	2.01	153000	184	140	3.53	0.589	<3.9	449	481000	0.79	1.76	0.17	0.83	23	0.117	1.08	1.47	0.7	8.4	2.4	31.9	12.5	69.8	15.7	177	41.8	11780	0.237
AM22	CORE	AM22 CORE	190503	190503_771_LC893	LC893	30	10	3.5	0.23	0.015	0.02632	0.00046	0.29301	0.0634	0.0041	209	13	167.5	2.9	640	140	530	153000	56.1	<55	8.2	0.087	47.2	317	453400	0.292	0.596	2.66	0.119	12.44	0.0661	1.02	1.75	0.654	7.56	1.98	24.2	9.07	49	11.02	120.5	29.1	11050	0.091
AM22	RIM	AM22 RIM	190503	190503_772_LC894	LC894	30	10	3.5	0.172	0.01	0.02338	0.00043	0.30324	0.0541	0.0032	160.2	8.7	149	2.7	320	120	97	153000	73	155	6.2	1.3	54	259	450000	0.478	1.98	4.3	0.36	17.14	0.214	1.31	1.08	0.7	4.1	1.2	15.6	6.5	40.5	9.67	117	31.6	11840	0.107
AM22	CORE	AM22 CORE	190503	190503_773_LC895	LC895	30	10	3.5
AM22	RIM	AM22 RIM	190503	190503_774_LC896	LC896	30	10	3.5
AM22	CORE	AM22 CORE	190503	190503_776_LC897	LC897	30	10	3.5	0.197	0.013	0.02663	0.00056	0.32755	0.0536	0.0033	182	11	169.4	3.5	300	130	153	153000	51.6	<64	3.88	0.238	29	248	454900	0.257	3.2	2.33	0.084	9.15	0.059	0.87	1.11	0.522	5.28	1.39	17.6	6.68	37.6	8.88	101.6	26.5	11180	0.065
AM22	RIM	AM22 RIM	190503	190503_777_LC898	LC898	30	10	3.5	0.18	0.017	0.02437	0.0008	0.11891	0.0541	0.0052	167	14	155.2	5	330	200	6.3	153000	76.2	72	5.38	0.229	11.7	615	505000	0.93	0.86	0.71	0.052	38.9	0.116	1.76	2.67	1.32	13.74	3.84	46.2	17.25	92.8	20.12	221.3	53.2	11610	0.173
AM22	CORE	AM22 CORE	190503	190503_778_LC899	LC899	30	10	3.5	0.181	0.015	0.02628	0.00065	0.086414	0.05	0.0043	168	13	167.2	4.1	160	180	22	153000	65.4	<71	3.94	0.212	10.4	366	493000	0.317	0.65	1.4	0.0187	12.2	0.072	1.24	2.05	0.83	8.4	2.25	27.2	10.1	54.3	12.1	128	31.1	11680	0.091
AM22	RIM	AM22 RIM	190503	190503_779_LC900	LC900	30	10	3.5	0.191	0.023	0.02608	0.00081	0.24228	0.0555	0.0071	183	23	166	5.1	340	260	77	153000	73	200	3.7	0.6	24.7	297	453000	0.387	0.86	18.7	0.04	12.2	0.063	0.96	1.48	0.511	5.15	1.48	20.5	7.99	45.3	10.61	118.9	29.9	10670	0.107
AM22	CORE	AM22 CORE	190503	190503_786_LC901	LC901	30	10	3.5	0.171	0.013	0.02622	0.0005	0.0036419	0.0474	0.0038	159	12	166.9	3.1	40	160	1.96	153000	180	131	4.98	0.241	<3.3	408	475300	0.362	0.63	0.53	0.54	14.1	0.26	1.78	2.33	0.764	9.92	2.69	32.6	11.76	60.9	13.02	133.7	30	11340	0.119
AM22	RIM	AM22 RIM	190503	190503_787_LC902	LC902	30	10	3.5	0.1624	0.0089	0.02518	0.00053	0.092019	0.047	0.0026	152.4	7.7	160.3	3.3	40	110	13.9	153000	43	<72	3.3	0.243	<4	233	457000	0.331	0.62	8.7	0.0133	10.28	0.0304	0.48	0.75	0.4	3.77	1.08	14.6	6.08	36.3	8.86	105.4	28.8	11750	0.078
AM22	CORE	AM22 CORE	190503	190503_788_LC903	LC903	30	10	3.5	0.286	0.034	0.02774	0.00092	0.11039	0.0732	0.0079	254	26	176.4	5.7	950	200	9.4	153000	63.7	80	7.2	0.45	27	305	492000	0.319	0.61	7.8	0.039	10.87	0.0226	0.7	1.18	0.395	6.65	1.98	24.6	9.06	46.3	10.23	102	22.2	11540	0.159
AM22	CORE	AM22 CORE	190503	190503_789_LC904	LC904	30	10	3.5	0.179	0.018	0.0275	0.00057	0.10282	0.0472	0.0047	166	15	174.9	3.6	30	190	0.58	153000	40.7	<58	2.89	0.07	<3.6	230	485300	0.202	0.52	<0.017	0.0035	10.2	0.028	0.6	0.93	0.44	5.3	1.39	16.7	6.4	35.7	8.1	88	20.5	12030	0.083
AM22	RIM	AM22 RIM	190503	190503_791_LC905	LC905	30	10	3.5	0.192	0.017	0.02566	0.00061	0.23114	0.054	0.0046	178	15	163.3	3.9	310	180	18.6	153000	80.3	<88	4.15	0.34	24.6	439	454000	0.487	0.69	7.3	0.018	16.8	0.087	1.23	2.18	0.85	9.27	2.5	30.5	11.79	65.9	14.9	159	38	10520	0.135
AM22	CORE	AM22 CORE	190503	190503_792_LC906	LC906	30	10	3.5	0.189	0.012	0.02577	0.00064	0.37396	0.0537	0.0034	175	10	164	4	330	130	17	153000	69.5	<56	3.9	0.63	490	656	468400	0.471	1.25	2.2	0.069	20.4	0.167	2.97	4.3	1.53	16.9	4.5	52	18.8	99	21.3	224	51.2	11150	0.164
AM22	RIM	AM22 RIM	190503	190503_793_LC907	LC907	30	10	3.5	0.242	0.027	0.02683	0.00057	0.51079	0.0671	0.007	223	23	170.6	3.6	700	190	51	153000	65.2	<70	4.67	2.25	30	316	451000	0.488	5.2	4.1	0.066	13.1	0.057	0.54	1.05	0.42	4.97	1.45	20.7	8.4	49.8	11.72	134.3	34.6	10750	0.116
AM22	CORE	AM22 CORE	190503	190503_794_LC908	LC908	30	10	3.5	0.178	0.013	0.02621	0.00046	0.18226	0.0496	0.0036	166	11	166.8	2.9	130	150	0.83	153000	162	<64	8.54	0.444	<3.4	706	476300	0.673	0.511	<0.043	0.0109	16.71	0.116	1.93	4.01	1.22	17.9	4.99	59.6	21.38	106.9	22.31	219.6	46.49	9970	0.24
AM22	RIM	AM22 RIM	190503	190503_796_LC909	LC909	30	10	3.5	0.188	0.013	0.02496	0.0005	0.23369	0.0545	0.004	174	11	158.9	3.2	390	180	19.3	153000	134.9	<73	6.94	0.88	17.7	577	469000	1.043	1.2	2.95	0.087	26	0.063	0.83	2.08	0.702	11.41	3.68	45.8	16.62	87.8	18.29	181.4	38.4	10910	0.302
AM22	CORE	AM22 CORE	190503	190503_797_LC910	LC910	30	10	3.5	0.171	0.018	0.02619	0.00061	0.26934	0.0472	0.0048	159	15	166.6	3.8	30	200	0.45	153000	34.3	<61	2.77	0.087	<3.6	208	483100	0.222	0.476	<0.05	0.0047	7.8	0.0234	0.48	0.97	0.44	4.3	1.22	16.1	5.8	31	6.9	73	18.8	12220	0.048
AM22	RIM	AM22 RIM	190503	190503_798_LC911	LC911	30	10	3.5
AM22	CORE	AM22 CORE	190503	190503_799_LC912	LC912	30	10	3.5
AM22	CORE	AM22 CORE	190503	190503_801_LC913	LC913	30	10	3.5	0.203	0.017	0.0264	0.00057	0.062103	0.0558	0.0047	187	14	168	3.6	390	180	393	153000	80.1	105	5.56	0.193	<3.9	410	477600	0.414	0.85	15	0.053	14.25	0.057	0.99	1.58	0.783	7.6	2.21	27.4	10.82	63.2	15.1	172.2	43.7	11280	0.139
AM22	RIM	AM22 RIM	190503	190503_802_LC914	LC914	30	10	3.5	0.17	0.011	0.0251	0.00065	0.1622	0.0492	0.0033	159.1	9.8	159.8	4.1	140	140	0.63	153000	68.8	<66	4.41	0.086	<3.9	508	488500	0.741	0.54	<0.067	0.0042	23.2	0.0316	0.58	1.45	0.783	8.65	2.5	33.5	13.27	77.3	17.9	201	50.6	11430	0.147
AM22	CORE	AM22 CORE	190503	190503_803_LC915	LC915	30	10	3.5	0.184	0.019	0.02643	0.00076	0.12924	0.0507	0.0053	171	17	168.2	4.8	170	210	0.79	153000	64	<63	3.73	0.198	<4.2	380	484000	0.316	0.66	0.11	<0.0042	12.3	0.0361	0.68	1.74	0.69	9.6	2.67	31.7	11	57	12.4	124	26.6	11820	0.097
AM22	RIM	AM22 RIM	190503	190503_804_LC916	LC916	30	10	3.5	0.192	0.016	0.02551	0.00065	0.20972	0.0547	0.0044	178	14	162.4	4.1	400	200	52	153000	60.9	88	4.24	0.69	58	404	474000	0.562	0.94	4.5	0.086	17	0.09	0.98	1.89	0.76	8.19	2.36	28	11.1	61.9	14	152	36	11600	0.15
AM22	CORE	AM22 CORE	190503	190503_806_LC917	LC917	30	10	3.5	0.194	0.0094	0.02819	0.00082	0.29288	0.0505	0.0027	181.3	8.5	179.2	5.2	180	110	3.9	153000	62	<58	3.46	0.86	4	364	466200	0.345	2.72	0.099	0.029	12.1	0.064	1.03	1.49	0.562	6.57	1.9	24.8	9.8	56.1	13.9	163	40.5	11190	0.099
AM22	RIM	AM22 RIM	190503	190503_807_LC918	LC918	30	10	3.5	0.175	0.013	0.02507	0.00072	0.059164	0.0511	0.004	163	12	159.6	4.5	200	160	14.3	153000	64.8	<89	3	0.367	18.1	287	453000	0.421	0.77	0.12	0.0251	12.33	0.033	0.34	0.82	0.371	4.55	1.303	17.9	7.53	45	10.71	128	32.6	10490	0.133
AM22	CORE	AM22 CORE	190503	190503_808_LC919	LC919	30	10	3.5	0.184	0.012	0.02666	0.00042	0.023132	0.0503	0.0033	171	10	169.6	2.6	170	140	6.1	153000	72.4	<56	3.29	0.23	10.4	382	468700	0.315	0.62	0.4	0.0043	12.7	0.065	1.3	2.08	0.858	8.5	2.32	28.9	10.7	59.1	13.2	143	34.9	11120	0.095
AM22	RIM	AM22 RIM	190503	190503_809_LC920	LC920	30	10	3.5	0.18	0.012	0.02643	0.00049	0.24649	0.0494	0.0031	168	10	168.1	3.1	160	140	0.68	153000	59.2	<74	3.57	0.104	<4	425	488500	0.55	0.65	<0.096	<0.0038	15.96	0.0265	0.46	1.21	0.585	6.19	2.02	27.2	10.75	65.7	16.08	184.5	47.7	10860	0.125
AM22	CORE	AM22 CORE	190503	190503_816_LC921	LC921	30	10	3.5	0.189	0.016	0.0269	0.00065	0.47544	0.0511	0.004	175	13	171.1	4.1	240	180	29	153000	58.7	<56	2.99	0.153	9.2	397	485600	0.34	0.63	0.81	0.026	14.3	0.077	1.14	2.3	0.99	9.1	2.57	30.7	11.06	59.8	13.55	146.3	34.5	11530	0.083
AM22	RIM	AM22 RIM	190503	190503_817_LC922	LC922	30	10	3.5
AM22	CORE	AM22 CORE	190503	190503_818_LC923	LC923	30	10	3.5	0.2411	0.0079	0.03435	0.00055	0.25987	0.0509	0.0016	219.1	6.5	217.7	3.4	225	72	5.2	153000	479	<67	2.09	0.106	18.8	1155	486400	2.2	0.81	0.056	0.088	10.24	0.0326	0.49	1.87	0.388	14	5.36	81	34.6	201	44.6	462	99.2	11760	0.637
AM22	RIM	AM22 RIM	190503	190503_819_LC924	LC924	30	10	3.5	0.211	0.014	0.0281	0.0013	0.69454	0.0546	0.0028	194	11	178.8	8.2	360	110	383	153000	311	151	9.4	2	990	600	454000	1	1.43	8	0.295	15.3	0.098	1.01	1.48	0.576	8.4	2.71	38.7	16.2	94	22	237	57	11410	0.224
AM22	CORE	AM22 CORE	190503	190503_821_LC925	LC925	30	10	3.5	0.249	0.048	0.0249	0.0012	0.10168	0.072	0.012	225	39	158.2	7.4	940	390	680	153000	53	520	4.8	4.4	540	164	488000	0.255	9.3	85	0.157	7.74	0.074	0.73	0.55	0.295	2.54	0.59	9.2	3.93	24.1	6.4	80.7	22.6	12360	0.048
AM22	RIM	AM22 RIM	190503	190503_822_LC926	LC926	30	10	3.5	0.18	0.018	0.0252	0.00097	0.083237	0.0517	0.0043	168	15	160.4	6.1	380	310	12.5	153000	63.2	<85	3.94	0.7	18	267	513000	0.33	0.68	6.1	0.088	10.3	0.041	0.55	0.91	0.46	3.9	1.2	16.7	6.7	40.3	9.6	118	32.2	12590	0.067
AM18	CORE	AM18 CORE	190503	190503_823_LC927	LC927	30	10	3.5
AM18	CORE	AM18 CORE	190503	190503_824_LC928	LC928	30	10	3.5	0.258	0.019	0.02575	0.00044	0.41036	0.0726	0.005	232	15	163.9	2.8	920	140	10	153000	160	111	4.24	0.87	8.6	740	462800	0.9	0.72	0.83	0.31	23.6	0.177	2.5	4.03	1.24	18.3	5.12	60.7	21.4	111	23.7	241	54.3	11890	0.279
AM18	RIM	AM18 RIM	190503	190503_826_LC929	LC929	30	10	3.5	0.246	0.011	0.02517	0.00049	0.25181	0.071	0.0031	223.2	8.9	160.3	3.1	936	91	7	153000	89.4	<60	4.37	0.414	6	529	484100	1.216	0.621	0.4	0.071	28	0.0622	0.91	2.31	0.636	10.57	3.17	40.6	15.27	81.3	17.2	178.5	41.6	12570	0.302
AM4	CORE	AM4 CORE	190503	190503_827_LC930	LC930	30	10	3.5	0.421	0.047	0.02849	0.00082	0.14391	0.107	0.012	354	33	181.1	5.1	1680	220	1.58	153000	175	<69	7.97	0.612	<4.3	1260	487000	0.8	0.51	0.097	0.26	20.7	0.236	3.16	5.53	2.13	28.4	8.7	106	37.1	187	36.6	361	71.2	10650	0.266
AM4	RIM	AM4 RIM	190503	190503_828_LC931	LC931	30	10	3.5	1.23	0.13	0.0347	0.0016	0.70406	0.255	0.019	805	60	220.1	9.7	3180	120	200	153000	99	200	25	0.85	360	451.7	467000	0.97	0.62	1.91	0.22	19.29	0.097	0.7	1.43	0.387	7.6	2.55	33.4	12.6	68.4	15.73	166.8	36.9	12850	0.4
AM4	CORE	AM4 CORE	190503	190503_829_LC932	LC932	30	10	3.5
AM4	RIM	AM4 RIM	190503	190503_831_LC933	LC933	30	10	3.5
AM4	CORE	AM4 CORE	190503	190503_832_LC934	LC934	30	10	3.5	1.25	0.12	0.0369	0.0017	0.71252	0.247	0.019	810	52	234	11	3120	120	20.5	153000	238	<75	11.7	0.623	12	452	472000	0.588	0.531	1.27	0.84	16.13	0.206	2.42	2.59	0.748	11.37	3.15	39.5	13.19	66.1	13.24	129.6	27.5	10350	0.194
AM18 LHG	CORE	AM18 LHG CORE	190503	190503_833_LC935	LC935	30	10	3.5	0.212	0.019	0.02721	0.00065	0.084641	0.0569	0.0051	194	16	173	4.1	430	200	0.89	153000	90.2	<78	3.25	0.18	<5.7	573	446500	0.515	0.396	<0.072	0.0135	16.7	0.126	2.04	3.86	1.47	15.6	3.98	48.5	16.8	85.8	17.46	180	38.5	10280	0.206
AM18 LHG	RIM	AM18 LHG RIM	190503	190503_834_LC936	LC936	30	10	3.5	0.193	0.013	0.0261	0.0006	0.39389	0.0537	0.0034	179	11	166.1	3.8	330	140	30	153000	156.1	<63	9.32	1.38	19.1	2605	473300	2.29	0.55	0.7	0.046	28.8	0.207	3.99	11.8	7.14	73.3	20.6	234.3	77.4	354	65.1	573	111.6	10370	0.366
AM18 LHG	CORE	AM18 LHG CORE	190503	190503_836_LC937	LC937	30	10	3.5	0.177	0.016	0.02722	0.00091	0.18826	0.0475	0.0042	165	14	173.1	5.7	60	180	32	153000	36.9	<83	2.15	<0.067	6	198	448100	0.257	0.5	0.26	0.0179	11	0.0227	0.37	0.95	0.358	4.61	1.11	14.1	5.41	29.9	6.94	80.4	21.16	11220	0.038
AM18 LHG	CORE	AM18 LHG CORE	190503	190503_837_LC938	LC938	30	10	3.5	0.18	0.012	0.02584	0.00045	0.32214	0.0506	0.0032	167	10	164.4	2.8	190	130	0.53	153000	221	<58	5.25	0.171	4.5	1250	460500	1.25	0.478	<0.048	0.014	55.8	0.226	4.23	9	3.11	37.7	9.6	110	38.2	187	37.8	361	77.1	9290	0.257
AM18 LHG	RIM	AM18 LHG RIM	190503	190503_838_LC939	LC939	30	10	3.5	0.174	0.011	0.026	0.00072	0.11772	0.0487	0.0032	162.2	9.7	165.4	4.5	110	140	0.5	153000	240	<63	7.34	0.243	<4.3	1390	473100	2.43	0.59	<0.093	0.0117	96	0.292	6.5	12.8	4.08	46.2	11.1	123	41.5	203	39.8	374	76.8	9380	0.423
AM18 LHG	CORE	AM18 LHG CORE	190503	190503_839_LC940	LC940	30	10	3.5	0.253	0.026	0.02629	0.00053	0.0087269	0.07	0.0072	228	21	167.3	3.3	870	210	1.89	153000	56.5	<81	2.86	<0.057	7	380	482300	0.358	0.43	<0.096	0.0132	15.3	0.064	0.77	1.66	0.77	7.6	2.17	24.8	10.1	56.6	13.1	146	37.5	11330	0.08
AM22	CORE	AM22 CORE	190503	190503_846_LC941	LC941	30	10	3.5	0.484	0.031	0.02958	0.00064	0.4217	0.1189	0.0068	399	21	187.9	4	1931	97	1.14	153000	99.9	<75	4.36	0.797	<4.3	289.9	461700	0.579	1.81	<0.091	0.015	13.33	0.0321	0.6	1.13	0.362	6.22	1.83	23.13	8.69	45.5	10.02	103.4	22.67	11370	0.177
AM22	CORE	AM22 CORE	190503	190503_847_LC942	LC942	30	10	3.5	0.206	0.014	0.02588	0.0005	0.4083	0.0576	0.0037	189	12	164.7	3.2	470	140	11.4	153000	77	<68	3.35	0.26	9.1	510	475000	0.483	0.88	0.43	0.0151	20.7	0.122	1.62	3.17	1.25	12.7	3.4	42	14.5	75	16	161	36.5	11780	0.107
AM22	CORE	AM22 CORE	190503	190503_848_LC943	LC943	30	10	3.5
AM22	RIM	AM22 RIM	190503	190503_849_LC944	LC944	30	10	3.5	0.212	0.014	0.02635	0.00042	0.31797	0.0585	0.0037	195	12	167.7	2.6	480	130	36	153000	100.9	<60	5.57	0.136	<3.7	394	470400	0.624	0.537	0.43	0.022	17.61	0.0404	0.75	1.65	0.593	8.19	2.38	30.3	11.45	61.3	13.49	138.9	31.52	11100	0.192
AM22	CORE	AM22 CORE	190503	190503_851_LC945	LC945	30	10	3.5	0.552	0.038	0.02895	0.00079	0.51419	0.1387	0.0082	444	24	184	4.9	2190	100	210	153000	133	<75	3.81	0.236	9.5	862	438300	0.78	0.98	3.2	0.061	25	0.157	2.67	4.19	1.77	19.4	5.48	69.1	24.6	127.3	27.3	278	61.2	9670	0.227
AM22	CORE	AM22 CORE	190503	190503_852_LC946	LC946	30	10	3.5	0.529	0.076	0.02942	0.00095	0.88283	0.125	0.014	415	47	186.9	5.9	1850	190	18.7	153000	76	73	4.78	0.188	18.4	379	462100	0.517	0.584	1.1	0.118	19.6	0.065	0.8	1.41	0.655	6.58	2	26.4	10.53	59.1	13.33	150.9	36.9	10940	0.096
AM22	CORE	AM22 CORE	190503	190503_853_LC947	LC947	30	10	3.5	0.245	0.032	0.02807	0.00073	0.087763	0.0642	0.0088	220	27	178.4	4.6	600	320	620	153000	148	<88	8.88	1.13	66	596	429900	0.427	4.62	0.37	0.181	14.9	0.105	2.03	3.62	1.01	17.3	4.62	53.4	17.9	88.1	17.3	167	33.1	9830	0.16
AM22	RIM	AM22 RIM	190503	190503_854_LC948	LC948	30	10	3.5	0.323	0.044	0.02767	0.00087	0.20986	0.085	0.011	280	32	175.9	5.5	1230	270	13.2	153000	260	200	8.5	0.76	22.1	832	411000	0.555	0.54	0.28	0.221	18.5	0.238	3.55	5.91	1.48	23	6.33	73.1	24.49	120.4	23.5	226.5	45.7	8950	0.199
AM22	CORE	AM22 CORE	190503	190503_856_LC949	LC949	30	10	3.5	0.86	0.084	0.0323	0.00094	0.1761	0.194	0.02	624	45	204.9	5.9	2720	160	35	153000	81	<120	3.79	0.64	31	350	449000	0.35	0.57	1.34	0.056	12.5	0.079	1.02	1.9	0.6	9	2.29	27	10	52	10.6	111	25	11690	0.145
AM22	CORE	AM22 CORE	190503	190503_857_LC950	LC950	30	10	3.5	0.306	0.063	0.0276	0.0017	0.9377	0.0757	0.0097	258	41	175	11	860	220	29	153000	84	<70	4.02	0.56	52	420	437000	0.408	2.5	1.08	0.18	14.3	0.208	1.9	2.32	0.91	9.8	2.7	33.6	11.7	58	11.9	124	27.9	10860	0.111
AM22	RIM	AM22 RIM	190503	190503_858_LC951	LC951	30	10	3.5
AM22	CORE	AM22 CORE	190503	190503_859_LC952	LC952	30	10	3.5	0.22	0.02	0.02581	0.00047	0.031186	0.0617	0.0054	205	19	164.3	3	630	200	13.7	153000	120.5	<69	7.77	0.693	13.6	528	493500	0.633	0.7	0.3	0.041	17.7	0.0612	1.18	2.38	0.721	11.9	3.6	43.7	15.46	79.5	17.16	165.4	35.5	11510	0.237
AM22	RIM	AM22 RIM	190503	190503_861_LC953	LC953	30	10	3.5	0.22	0.019	0.02547	0.00056	0.11047	0.0629	0.0055	201	16	162.1	3.5	640	190	22	153000	118.2	<84	7.13	0.64	15.7	482	488000	0.631	0.78	0.39	0.042	18.1	0.072	0.84	2.16	0.762	10.48	3.12	39.1	13.98	73.3	15.22	156.5	34.1	11840	0.243
AM22	CORE	AM22 CORE	190503	190503_862_LC954	LC954	30	10	3.5	0.187	0.014	0.02623	0.00051	0.33514	0.0522	0.0045	173	12	166.9	3.2	240	180	14.4	153000	160.7	<69	5.37	0.754	<4.6	867	460000	0.79	0.91	0.068	0.101	24.92	0.154	2.87	5.3	1.46	23.4	6.4	74.2	25.69	129.8	26.65	259.8	54.3	10620	0.283
AM22	RIM	AM22 RIM	190503	190503_863_LC955	LC955	30	10	3.5	0.1921	0.0077	0.02604	0.00044	0.38499	0.0537	0.0019	178.1	6.6	165.7	2.8	348	84	21	153000	81	<59	4.06	0.146	<3.1	427	467300	0.793	0.553	0.122	0.0181	26.09	0.0525	0.96	1.73	0.715	9.64	2.71	32.9	12.04	64	14.12	148.9	34.33	11050	0.259
AM22	CORE	AM22 CORE	190503	190503_864_LC956	LC956	30	10	3.5	0.174	0.024	0.02456	0.00058	0.53744	0.0517	0.0067	163	21	156.4	3.6	250	290	<0.59	153000	127	<120	4.33	0.23	<7.4	1580	505000	0.96	0.49	<0.19	0.0369	42.6	0.441	8.4	12	4.36	48.1	12.51	139.2	45.6	221	45.9	439	94.9	10850	0.237
BS1	CORE	BS1 CORE	190503	190503_866_LC957	LC957	30	10	3.5	0.226	0.037	0.0267	0.0022	0.36161	0.062	0.01	206	31	170	14	600	360	1.6	153000	124.7	<120	6.6	0.327	8.4	420	456000	0.449	0.45	0.15	0.066	15.23	0.063	0.87	1.74	0.61	8.4	2.72	32.9	12.07	64.6	13.21	135.9	28.85	9720	0.241
BS1	CORE	BS1 CORE	190503	190503_867_LC958	LC958	30	10	3.5
BS1	RIM	BS1 RIM	190503	190503_868_LC959	LC959	30	10	3.5	0.182	0.016	0.02602	0.00048	0.19607	0.0512	0.0045	169	14	165.6	3	200	180	1.49	153000	246	<67	11.7	0.433	18	1260	478000	1.01	0.62	<0.072	0.0119	19.7	0.191	3.15	5.9	2.18	27.28	8.55	106.5	38.7	189	36.5	341	70.2	9730	0.301
AC25	RIM	AC25 RIM	191024	191024_006_LC0960	LC0960	30	5	3.5	0.231	0.022	0.03177	0.00077	0.17588	0.0532	0.0054	210	18	201.6	4.8	270	210	22.9	153000	205	<620	7.56	0.78	17.4	1196	425500	1.64		0.6	0.06	14.52	0.189	2.57	4.82	0.99	23.8	8.12	98	38.5	194.1	38.8	357	76.8	9200	0.536
AC25	CORE	AC25 CORE	191024	191024_007_LC0961	LC0961	30	5	3.5	0.188	0.013	0.02613	0.00058	0.29987	0.0524	0.0035	174	11	166.3	3.7	260	140	19.6	153000	81	1200	4.77	0.331	16.9	423	435800	0.665		0.41	0.042	23.95	0.062	1.11	1.9	0.74	9.19	2.63	31.1	12.24	67.1	15.3	153.2	37.4	10070	0.18
AC25	RIM	AC25 RIM	191024	191024_008_LC0962	LC0962	30	5	3.5	0.181	0.013	0.02611	0.00044	0.17664	0.0503	0.0035	168	11	166.1	2.7	160	140	<0.47	153000	37	500	3.42	0.102	<12	244.9	427300	0.477		<0.098	<0.0035	15.81	0.0225	0.53	1.02	0.501	5.53	1.529	17.56	7.2	37.4	8.58	87.8	22.83	9990	0.085
AC25	CORE	AC25 CORE	191024	191024_010_LC0963	LC0963	30	5	3.5	0.191	0.03	0.02569	0.00099	0.19576	0.0552	0.0091	175	26	163.5	6.2	270	340	2.66	153000	101	<630	11.1	0.4	<14	331	405200	0.572		<0.12	<0.0061	11.25	0.043	0.73	1.55	0.51	7.76	2.27	27.6	9.88	50.5	10.63	102.4	23	8590	0.153
AC25	RIM	AC25 RIM	191024	191024_011_LC0964	LC0964	30	5	3.5	0.182	0.011	0.02569	0.00056	0.087862	0.0518	0.0032	169.5	9.3	163.5	3.5	230	130	<0.5	153000	45	640	3.89	0.16	12.4	310.4	422300	0.618		<0.083	<0.0061	18.65	0.035	0.48	1.41	0.479	6.66	1.9	22.89	9.1	48.4	10.82	113.4	26.9	10100	0.197
AC25	CORE	AC25 CORE	191024	191024_012_LC0965	LC0965	30	5	3.5	0.1828	0.0097	0.02599	0.0004	0.2307	0.0509	0.0023	170	8.3	165.4	2.5	230	110	2.62	153000	90	<510	4.25	0.272	<12	820	417700	1.05		<0.074	0.0259	30.4	0.171	2.67	4.18	1.57	19.7	5.69	65.4	24.8	125.5	28.1	276	62.8	9610	0.28
AC25	RIM	AC25 RIM	191024	191024_013_LC0966	LC0966	30	5	3.5	0.197	0.013	0.02654	0.00055	0.17782	0.0544	0.004	182	11	168.9	3.5	320	160	0.62	153000	<35	610	3.31	0.128	14	229.3	418200	0.386		<0.087	0.0105	13.1	0.0201	0.46	0.81	0.401	4.22	1.274	15.74	6.28	35.1	8.51	93.1	24.21	9690	0.103
AC25	CORE	AC25 CORE	191024	191024_015_LC0967	LC0967	30	5	3.5	0.175	0.01	0.02563	0.00057	0.31335	0.0497	0.0029	163.4	8.8	163.1	3.6	160	120	5.3	153000	161	<560	4.68	0.24	<13	648	417700	1.243		<0.074	0.22	36.1	0.106	1.5	2.44	1.05	13	3.96	47	18.69	100.7	23.1	239	58.3	9530	0.307
AC25	RIM	AC25 RIM	191024	191024_016_LC0968	LC0968	30	5	3.5	0.171	0.0094	0.02462	0.00061	0.15341	0.0507	0.0029	159.8	8.1	156.8	3.9	190	120	78	153000	<35	<500	4.77	0.82	24.6	279.4	433000	0.588		0.97	0.099	23.32	0.191	1.91	2.18	0.99	7.55	2.03	21.67	7.9	41.8	9.43	99	24.73	10370	0.098
AC25	RIM	AC25 RIM	191024	191024_017_LC0969	LC0969	30	5	3.5	0.182	0.011	0.02638	0.00057	0.087316	0.0509	0.0035	171	10	167.9	3.6	190	140	0.64	153000	67	<490	4.38	0.246	<11	305.1	435400	0.629		<0.094	0.0382	17.74	0.0369	0.56	1.26	0.43	6.25	1.96	23.61	9.21	46.2	10.7	104.4	23.57	10590	0.222
AC25	RIM	AC25 RIM	191024	191024_018_LC0970	LC0970	30	5	3.5	0.169	0.013	0.02572	0.0005	0.15242	0.0478	0.0037	158	11	163.7	3.2	50	150	0.49	153000	<31	<450	3.07	0.162	<10	271.3	442500	0.401		<0.096	0.0067	12.99	0.0323	0.74	1	0.442	5.03	1.52	18.39	7.62	41.7	10.34	113.3	29.33	10230	0.095
AC25	RIM	AC25 RIM	191024	191024_020_LC0971	LC0971	30	5	3.5	0.169	0.015	0.02554	0.00083	0.36042	0.048	0.0039	158	13	162.6	5.2	80	170	<0.54	153000	112	<530	6.26	0.322	<12	653	423700	1.67		<0.1	0.0075	29.5	0.042	0.79	2.42	0.7	12.61	4.04	49.8	19.44	102.7	22.98	223.3	49.1	9620	0.465
AC25	CORE	AC25 CORE	191024	191024_021_LC0972	LC0972	30	5	3.5	0.201	0.011	0.02623	0.00048	0.13758	0.0548	0.0033	185.4	9.3	166.9	3	390	120	1.4	153000	60	<460	4.29	0.285	<10	508	433000	0.695		<0.057	0.009	18.54	0.072	1.2	2.42	0.723	11.09	3.41	39.9	15.34	79.6	17.66	177.7	40.3	10460	0.229
AC25	RIM	AC25 RIM	191024	191024_022_LC0973	LC0973	30	5	3.5
AC25	RIM	AC25 RIM	191024	191024_023_LC0974	LC0974	30	5	3.5	0.179	0.021	0.02669	0.0007	0.27722	0.0496	0.0063	166	18	169.8	4.4	80	250	2.38	153000	82	<500	6.09	0.275	<12	395.4	432000	0.699		<0.093	0.0114	14	0.038	0.64	1.88	0.447	8.2	2.538	31.22	11.98	62.4	13.84	135.5	30.87	10250	0.232
AC25	RIM	AC25 RIM	191024	191024_025_LC0975	LC0975	30	5	3.5	0.263	0.022	0.0253	0.00071	0.23388	0.0743	0.0056	235	17	161.1	4.5	970	170	710	153000	82	<490	22.9	1.01	104	195	423400	0.533		5.2	0.57	11.59	0.18	1	0.96	0.367	3.88	1.259	14.63	5.7	30.16	6.75	68	15.82	10130	0.164
AC25	CORE	AC25 CORE	191024	191024_026_LC0976	LC0976	30	5	3.5	0.178	0.012	0.02644	0.00062	0.074613	0.0498	0.0036	168	11	168.2	3.9	140	150	0.87	153000	95	<470	5.71	0.515	<11	463	432000	0.978		<0.074	0.014	24.2	0.056	1.25	2.12	0.686	10.82	3.27	38.6	14.31	71.1	15.4	148.5	32.52	10550	0.325
AC25	RIM	AC25 RIM	191024	191024_027_LC0977	LC0977	30	5	3.5	0.189	0.016	0.02647	0.00051	0.18014	0.0523	0.0047	175	13	168.4	3.2	220	180	<0.49	153000	<31	<470	2.66	0.097	<11	209	436000	0.382		<0.02	<0.0045	13.26	0.018	0.32	0.74	0.386	3.81	1.241	14.84	5.85	31.2	7.77	84.6	20.87	10490	0.104
AC25	RIM	AC25 RIM	191024	191024_035_LC0979	LC0979	30	5	3.5	0.201	0.014	0.02636	0.00055	0.017975	0.0558	0.0039	185	11	167.7	3.4	370	150	1.73	153000	41	<470	3.03	0.27	<11	191.9	435700	0.422		1.4	0.0079	13.11	0.0218	0.269	0.74	0.406	3.74	1.11	13.72	5.54	29.67	7.21	76	20.03	10480	0.128
AC25	RIM	AC25 RIM	191024	191024_036_LC0980	LC0980	30	5	3.5	0.203	0.015	0.02647	0.00068	0.21094	0.0556	0.0041	187	12	168.4	4.3	380	160	<0.48	153000	44	<470	3.32	0.132	<11	346.2	445000	0.639		<0.091	0.0143	15.97	0.02	0.35	0.96	0.485	5.59	1.648	23.08	9.35	55.1	13.71	148.6	37.6	9940	0.188
AC25	CORE	AC25 CORE	191024	191024_037_LC0981	LC0981	30	5	3.5	0.171	0.013	0.0259	0.00051	0.23225	0.0478	0.0036	160	11	164.8	3.2	70	150	<0.46	153000	94	<440	3.64	0.145	<11	643	442000	0.541		<0.075	0.37	21.2	0.193	2.56	4.15	1.33	17.2	4.69	52.5	19.6	98.7	22.5	221	49.9	10110	0.18
AC25	RIM	AC25 RIM	191024	191024_038_LC0982	LC0982	30	5	3.5	0.189	0.015	0.02744	0.00054	0.041508	0.0502	0.0042	174	13	174.5	3.4	140	170	0.47	153000	<29	<450	2.65	<0.084	<10	107.2	436500	0.247		<0.11	<0.0047	7.4	0.0124	0.045	0.44	0.168	2.14	0.573	6.43	3	16.71	4.02	47.1	13	10700	0.052
AC25	CORE	AC25 CORE	191024	191024_040_LC0983	LC0983	30	5	3.5	0.194	0.021	0.02622	0.00087	0.10836	0.054	0.006	179	18	166.8	5.5	300	230	1.39	153000	189	<500	8.11	1.23	<11	698	437000	1.05		<0.13	0.008	21.27	0.061	1.39	3.09	0.99	15.45	4.87	57	21.71	109.1	23.85	223.1	46.3	9390	0.29
AC25	RIM	AC25 RIM	191024	191024_041_LC0984	LC0984	30	5	3.5	0.172	0.011	0.02559	0.00053	0.0050034	0.0489	0.0033	160.1	9.6	162.9	3.3	100	140	<0.51	153000	40	<460	3.25	<0.092	<11	267.5	437600	0.417		<0.055	<0.0028	17.21	0.0293	0.4	1.09	0.403	4.9	1.547	18.9	7.6	42.1	9.97	106.5	26.79	10630	0.139
AC25	CORE	AC25 CORE	191024	191024_043_LC0986	LC0986	30	5	3.5	0.225	0.011	0.03131	0.00059	0.2744	0.052	0.0025	205.7	9.3	198.8	3.7	260	100	13.9	153000	249	<520	4.61	0.694	<12	1205	439900	2.48		0.14	0.29	21.26	0.11	1.06	2.63	0.726	19.4	7.02	94.1	39	206	45.8	448	100.1	9930	0.705
AC25	RIM	AC25 RIM	191024	191024_045_LC0987	LC0987	30	5	3.5	0.19	0.016	0.02655	0.00059	0.14433	0.052	0.0044	176	13	168.9	3.7	220	170	<0.52	153000	<30	<490	2.06	<0.078	<10	100.1	432700	0.222		<0.062	<0.0058	8.08	0.0092	0.135	0.308	0.171	1.64	0.52	5.85	2.63	14.97	4.02	46.8	13.45	10940	0.053
AC25	CORE	AC25 CORE	191024	191024_046_LC0988	LC0988	30	5	3.5	0.173	0.015	0.02592	0.00055	0.087961	0.0487	0.0043	161	13	165	3.4	100	180	0.96	153000	92	<590	4.93	0.201	<14	479.5	432600	0.736		<0.15	<0.0073	17.38	0.075	1.56	2.29	0.778	11.49	3.36	38.5	14.6	75.3	16.67	163.3	39	10320	0.253
AC25	RIM	AC25 RIM	191024	191024_047_LC0989	LC0989	30	5	3.5	0.185	0.013	0.02592	0.0007	0.21139	0.0521	0.0043	172	11	164.9	4.4	240	170	0.55	153000	56	<490	3.85	0.103	<12	411	465000	0.481		<0.071	0.0059	18.14	0.073	1.24	2.31	0.91	10.1	2.72	31.8	12.35	63.6	14.82	149.7	36.7	10850	0.17
AC25	CORE	AC25 CORE	191024	191024_048_LC0990	LC0990	30	5	3.5	0.182	0.018	0.02605	0.00076	0.18827	0.0514	0.0056	169	16	165.8	4.7	200	230	<0.71	153000	238	<610	7.1	0.231	<14	656	418800	0.827		<0.1	<0.0062	18.49	0.107	1.5	3.64	0.93	15.86	4.56	54.2	20.32	104.9	22.26	212.7	48	9110	0.278
AC25	RIM	AC25 RIM	191024	191024_051_LC0992	LC0992	30	5	3.5	0.22	0.016	0.02658	0.00048	0.15934	0.0598	0.0044	201	13	169.1	3	530	160	1.2	153000	65	<490	2.96	0.117	<12	266.9	456000	0.464		<0.067	0.0106	15.52	0.027	0.33	1.06	0.415	5.2	1.62	18.58	7.77	42.3	9.9	106.6	27.37	10700	0.112
AC25	CORE	AC25 CORE	191024	191024_052_LC0993	LC0993	30	5	3.5	0.229	0.019	0.02717	0.00068	0.035999	0.061	0.0049	208	15	172.8	4.3	570	170	0.84	153000	73	<490	3.77	0.12	<11	522	461000	0.59		<0.1	0.0137	19.2	0.078	1.18	2.84	0.96	12.7	3.69	43.3	15.5	77.5	18.1	176	40.2	11400	0.203
AC25	RIM	AC25 RIM	191024	191024_053_LC0994	LC0994	30	5	3.5	0.189	0.015	0.02445	0.00054	0.046821	0.0566	0.0047	175	13	155.7	3.4	410	170	41.6	153000	62	<780	5.5	1.39	253	497	427600	0.844		5.1	0.106	22	0.139	1.31	2.01	1.05	8.58	2.52	33	13.92	76.9	18.25	188.7	47.1	9950	0.192
AC25	CORE	AC25 CORE	191024	191024_055_LC0995	LC0995	30	5	3.5	0.232	0.027	0.02907	0.0009	0.12977	0.0589	0.0076	210	22	184.7	5.6	430	250	0.97	153000	112	<590	5.15	0.156	<13	437.2	416300	0.735		<0.036	0.023	17.39	0.036	0.66	1.51	0.536	9.21	2.93	36.1	13.73	68.4	15.13	144.4	31.71	9820	0.221
AC25	RIM	AC25 RIM	191024	191024_056_LC0996	LC0996	30	5	3.5	0.175	0.015	0.02651	0.00052	0.30881	0.0476	0.004	163	13	168.6	3.3	50	170	<0.6	153000	91	<530	4.14	0.172	<11	394.5	428000	0.663		<0.024	<0.0068	15.23	0.0232	0.93	1.51	0.59	8.45	2.47	30.3	11.87	62.6	14.5	144.9	35.12	9950	0.211
AC25	CORE	AC25 CORE	191024	191024_057_LC0997	LC0997	30	5	3.5	0.194	0.019	0.0266	0.00071	0.23553	0.0539	0.0053	181	17	169.2	4.4	250	190	<0.53	153000	160	<480	7.9	0.286	<10	481	439200	0.72		<0.019	0.0075	15.19	0.06	0.96	2.19	0.655	11.04	3.29	39.4	15.31	75.6	16.6	156.7	35.2	9950	0.231
AC25	RIM	AC25 RIM	191024	191024_058_LC0998	LC0998	30	5	3.5	0.198	0.021	0.02677	0.00068	0.061716	0.0541	0.0058	181	18	170.3	4.3	260	220	2.8	153000	210	<470	8.31	0.267	<11	600	432900	0.515		<0.019	0.0043	12.24	0.073	1.64	3.33	1.052	15.13	4.67	52.8	19.33	90.9	18.89	175.1	37	9460	0.182
AC25	CORE	AC25 CORE	191024	191024_065_LC0999	LC0999	30	5	3.5	0.191	0.017	0.02858	0.00046	0.045119	0.0488	0.0044	177	14	181.6	2.9	110	190	820	153000	49	<560	15.6	3.11	930	347	375100	0.633		4	0.057	24.8	0.115	1.48	1.91	0.87	8.42	2.26	26.3	9.73	53	12.38	131.2	34.2	8680	0.094
AC25	RIM	AC25 RIM	191024	191024_066_LC1000	LC1000	30	5	3.5	0.188	0.017	0.0268	0.00061	0.2307	0.0513	0.005	174	14	170.5	3.8	210	210	<0.79	153000	218	<720	3.1	<0.14	<16	490.4	426000	0.78		<0.18	0.041	26.2	0.053	0.67	1.69	0.74	7.32	2.47	32.7	13.48	74.8	18.29	202.2	53.7	9680	0.134
AC25	RIM	AC25 RIM	191024	191024_067_LC1001	LC1001	30	5	3.5	0.181	0.012	0.02552	0.00042	0.16303	0.0518	0.0037	168	10	162.5	2.6	220	150	<0.55	153000	200	<450	5.65	0.285	<9.9	695	450600	1.29		<0.095	0.62	27.8	0.221	1.97	3.38	0.9	15.78	4.68	56.8	22.1	111.3	24.4	235	52.4	10630	0.417
AC25	RIM	AC25 RIM	191024	191024_068_LC1002	LC1002	30	5	3.5	0.193	0.016	0.02587	0.00057	0.068356	0.0548	0.0048	178	13	164.7	3.6	330	190	27.3	153000	36	<470	4.06	2.2	144	217.3	450000	0.357		1.19	0.0119	12.13	0.0202	0.37	0.6	0.364	3.66	1.075	14.33	6.12	34.1	8.72	95.7	25.33	10610	0.13
AC25	CORE	AC25 CORE	191024	191024_070_LC1003	LC1003	30	5	3.5	0.192	0.014	0.02523	0.00051	0.11534	0.0557	0.0046	178	12	160.6	3.2	370	170	517	153000	70	<550	4.34	0.26	<13	482.8	425800	0.841		0.116	0.046	31.55	0.067	0.93	2.63	1.1	11.8	3.35	38.5	14.29	73.8	16.49	168.1	40.5	9820	0.24
AC25	RIM	AC25 RIM	191024	191024_071_LC1004	LC1004	30	5	3.5	0.1833	0.0092	0.02652	0.00037	0.21987	0.0499	0.0025	170.6	7.8	168.7	2.3	190	110	0.89	153000	68	<500	4.49	0.108	<12	348.3	448100	0.534		<0.066	<0.0043	26.56	0.067	0.75	1.86	0.94	8.23	2.28	26.84	10.2	53.2	12.1	128.7	32.32	10350	0.128
AC25	RIM	AC25 RIM	191024	191024_072_LC1005	LC1005	30	5	3.5	0.232	0.046	0.0258	0.0014	0.00129	0.066	0.013	208	37	164.4	8.5	580	400	1.69	153000	<38	<650	2.75	3.69	<15	131.9	440000	0.252		1.53	0.043	6.74	0.025	0.41	0.61	0.207	2.77	0.98	10.8	4.11	21.6	4.85	47.4	12.19	11160	0.057
AC25	CORE	AC25 CORE	191024	191024_073_LC1006	LC1006	30	5	3.5	0.2015	0.0094	0.02635	0.00037	0.091033	0.0556	0.0026	185.9	8	167.6	2.3	390	110	145	153000	322	<470	17.7	3.9	28.6	1544	427200	2.01		10.9	0.411	150	0.585	8.3	11.2	4.73	39.3	9.14	102.5	40.8	224	55.1	605	148.9	7340	0.326
AC25	RIM	AC25 RIM	191024	191024_075_LC1007	LC1007	30	5	3.5	0.174	0.0054	0.02578	0.00028	0.14177	0.049	0.0015	162.7	4.7	164.1	1.7	138	69	<0.52	153000	82	<460	9.48	0.26	<9.8	819	438600	1.636		0.024	0.0426	128.1	0.297	6.13	7.48	3.62	23.7	5.14	54.2	20.89	110.6	27.33	303.3	77.4	8850	0.182
AC25	RIM	AC25 RIM	191024	191024_076_LC1008	LC1008	30	5	3.5	0.206	0.022	0.02721	0.00051	0.48573	0.0542	0.0051	188	18	173.1	3.2	290	180	14	153000	141	<440	6.23	0.294	<10	554	460000	1.12		0.138	0.071	30.3	0.076	1.35	3.01	0.777	14.47	4.13	46	17.52	85.6	18.35	178.1	38.2	10870	0.361
AC25	RIM	AC25 RIM	191024	191024_077_LC1009	LC1009	30	5	3.5	0.433	0.031	0.02848	0.00055	0.14774	0.1097	0.0068	362	21	181	3.4	1730	120	38	153000	168	<460	9.7	3.78	551	1026	438900	1.84		2.69	0.064	122.5	0.276	5.6	11.14	3.37	39.5	9.18	92.7	32.2	155.6	33.36	319.2	73.4	9330	0.361
AC25	CORE	AC25 CORE	191024	191024_078_LC1010	LC1010	30	5	3.5	0.175	0.011	0.02601	0.00044	0.125	0.0491	0.0031	163.1	9.7	165.5	2.8	120	140	9.7	153000	106	<450	6	0.208	<11	586	452100	0.911		<0.088	0.0128	29.18	0.071	1.1	2.5	0.877	11.82	3.73	43.7	17.4	88.7	20.57	210.7	50.4	10310	0.232
AC25	RIM	AC25 RIM	191024	191024_080_LC1011	LC1011	30	5	3.5	0.198	0.017	0.02729	0.0007	0.1118	0.0532	0.0048	183	14	173.6	4.4	280	190	<0.74	153000	54	<670	2.65	<0.12	<15	283.9	431700	0.563		<0.17	<0.011	19.22	0.0201	0.42	1.28	0.467	5.39	1.48	18.7	7.8	43.5	10.63	118.1	30.36	10550	0.154
AC25	CORE	AC25 CORE	191024	191024_081_LC1012	LC1012	30	5	3.5	0.1781	0.0099	0.02545	0.00045	0.024541	0.051	0.003	165.9	8.6	162	2.8	200	120	33	153000	104	<470	5.8	0.269	<11	718	443200	1.046		0.27	0.0135	32.5	0.116	1.83	3.97	1.2	17.4	4.93	58.3	21.96	110.3	24.6	239	55	10170	0.25
AC25	RIM	AC25 RIM	191024	191024_082_LC1013	LC1013	30	5	3.5	0.184	0.013	0.02648	0.00053	0.16007	0.0506	0.0036	171	11	168.5	3.3	170	150	<0.57	153000	43	<480	2.84	<0.089	<11	224.6	441000	0.366		<0.076	<0.0031	14.45	0.0227	0.36	1	0.442	4.5	1.334	16.17	6.52	34.5	8.45	92.3	23.76	10830	0.098
AC25	RIM	AC25 RIM	191024	191024_083_LC1014	LC1014	30	5	3.5	0.191	0.014	0.02577	0.00059	0.04502	0.0541	0.0042	177	12	164	3.7	320	170	4.3	153000	92	<510	3.75	0.52	195	504	438000	0.562		0.26	0.035	19.1	0.096	1.62	2.41	1.01	11.1	3.13	37.5	14.8	77	18	187	47.2	10530	0.119
AC25	CORE	AC25 CORE	191024	191024_085_LC1015	LC1015	30	5	3.5	0.19	0.013	0.0266	0.00062	0.1998	0.0519	0.0036	176	11	169.2	3.9	230	140	0.6	153000	63	<500	3.73	0.126	<11	329.4	452900	0.533		0.039	0.0126	18.06	0.042	0.39	1.37	0.633	6.8	1.935	23.78	9.4	52	12.41	131.8	32.33	10650	0.147
AC25	RIM	AC25 RIM	191024	191024_087_LC1017	LC1017	30	5	3.5
AC25	CORE	AC25 CORE	191024	191024_088_LC1018	LC1018	30	5	3.5	0.18	0.016	0.02657	0.00073	0.12051	0.0505	0.0049	170	15	169	4.6	130	180	0.6	153000	103	<440	6.62	0.272	<9.6	661	434900	0.493		<0.084	0.0096	16.42	0.167	2.93	5.19	1.54	20.9	5.61	63.5	22.15	101.4	21.06	193	40.4	9820	0.165
AC25	RIM	AC25 RIM	191024	191024_095_LC1019	LC1019	30	5	3.5	0.165	0.012	0.02619	0.00047	0.012717	0.0455	0.0035	154	10	166.7	3	-30	150	0.62	153000	49	<470	2.5	<0.092	<10	225.6	433900	0.362		<0.062	<0.0058	14.76	0.0185	0.42	0.91	0.441	4.68	1.443	17.1	6.87	36.6	8.12	86.8	20.87	10400	0.112
AC25	RIM	AC25 RIM	191024	191024_096_LC1020	LC1020	30	5	3.5	0.191	0.016	0.02646	0.00052	0.23833	0.0522	0.0043	176	13	168.4	3.3	220	170	0.56	153000	111	<450	6.03	0.176	<10	347.3	444900	0.608		<0.058	<0.0071	16.6	0.026	0.49	1.45	0.424	7.57	2.43	28.22	10.99	54.5	12.25	123	27.11	11010	0.28
AC25	CORE	AC25 CORE	191024	191024_097_LC1021	LC1021	30	5	3.5	0.197	0.013	0.02661	0.00056	0.018997	0.0542	0.0037	182	11	169.3	3.5	340	130	53	153000	111	<460	4.72	0.212	<10	609	429800	1.02		0.42	0.032	33	0.057	0.91	2.29	0.8	13.7	4	49.3	19.4	96	22	207	46.2	10240	0.275
AC25	RIM	AC25 RIM	191024	191024_098_LC1022	LC1022	30	5	3.5	0.186	0.011	0.02689	0.00047	0.13897	0.0503	0.003	172.5	9.5	171	3	170	130	0.68	153000	36	<470	2.4	<0.085	<10	176.1	431700	0.306		<0.087	<0.0051	12.44	0.016	0.31	0.82	0.316	3.76	1.051	12.51	5.06	27.1	6.47	70.7	18.94	10520	0.077
AC25	RIM	AC25 RIM	191024	191024_100_LC1023	LC1023	30	5	3.5	0.199	0.014	0.02774	0.00066	0.052417	0.0524	0.0038	184	12	176.3	4.1	260	150	1.2	153000	42	<550	3.41	2.65	44.6	244.2	423800	0.382		1.51	0.0177	15.66	0.045	0.61	1.16	0.551	5.38	1.48	17.93	7.23	37.3	8.76	92.7	24.16	10200	0.118
AC25	CORE	AC25 CORE	191024	191024_101_LC1024	LC1024	30	5	3.5	0.177	0.014	0.02578	0.00045	0.049593	0.0498	0.0041	165	12	164.1	2.8	130	160	0.66	153000	98	<470	4.36	0.154	<10	353.7	435200	0.652		<0.089	<0.0061	18.47	0.0307	0.59	1.52	0.434	6.8	2.26	27.75	10.9	55.9	12.87	131.6	30.66	10600	0.277
AC25	RIM	AC25 RIM	191024	191024_102_LC1025	LC1025	30	5	3.5	0.201	0.013	0.02581	0.00057	0.082647	0.0568	0.004	185	11	164.3	3.6	410	150	0.96	153000	38	<480	2.92	0.091	<11	267.5	442900	0.418		<0.083	0.0345	13.59	0.0282	0.29	0.84	0.512	4.66	1.412	17.8	7.55	41.5	10.23	113.6	29.9	10510	0.111
AC25	RIM	AC25 RIM	191024	191024_103_LC1026	LC1026	30	5	3.5	0.196	0.012	0.02456	0.00048	0.21432	0.0578	0.0037	181	11	156.4	3	450	140	31.2	153000	74	<650	12.5	0.55	427	489	442300	0.93		1.57	0.178	30.4	0.067	0.91	2.27	0.86	10.91	3.02	37.3	14.93	77.3	17.71	182.4	43.7	10440	0.302
AC25	CORE	AC25 CORE	191024	191024_105_LC1027	LC1027	30	5	3.5	0.203	0.017	0.02667	0.00077	0.34167	0.0552	0.0043	187	14	169.6	4.8	370	170	289	153000	53	<450	6.7	0.177	12.3	498	456000	0.71		2.58	0.09	24.1	0.063	1.21	2.47	1.01	10.87	3.08	38.2	14.91	79.1	18.42	195.5	46.4	10570	0.143
AC25	RIM	AC25 RIM	191024	191024_106_LC1028	LC1028	30	5	3.5
AC25	RIM	AC25 RIM	191024	191024_107_LC1029	LC1029	30	5	3.5	0.193	0.023	0.02511	0.00074	0.4408	0.0579	0.0061	178	20	159.8	4.6	450	220	13.1	153000	140	<690	5	0.44	502	906	428200	0.88		0.84	0.024	30.3	0.131	2.37	4.07	2.09	18.9	5.66	68.2	27.3	141.4	32	322	74	9440	0.232
AC25	CORE	AC25 CORE	191024	191024_108_LC1030	LC1030	30	5	3.5	0.208	0.02	0.02735	0.00074	0.15837	0.0536	0.0045	191	17	173.9	4.6	360	200	194	153000	177	<630	10	0.6	<12	882	436300	1.2		0.79	0.113	28.05	0.155	2.83	4.76	1.24	21.3	6.52	77	28.09	138	29.6	272.1	59	9980	0.398
AC25	RIM	AC25 RIM	191024	191024_110_LC1031	LC1031	30	5	3.5	0.204	0.015	0.02588	0.00078	0.35924	0.0571	0.0039	188	12	164.7	4.9	440	140	13.5	153000	54	<660	4.2	0.61	580	198.5	442000	0.412		0.17	0.034	13.17	0.059	0.79	0.99	0.343	3.55	1.19	13.72	5.63	30.6	7.41	81.5	21.35	11320	0.12
AC25	CORE	AC25 CORE	191024	191024_111_LC1032	LC1032	30	5	3.5	0.186	0.013	0.02583	0.00048	0.18169	0.0524	0.0035	173	11	164.4	3	250	140	1.15	153000	45	<460	3.09	<0.09	<9.7	199.5	443700	0.341		<0.097	<0.006	13.53	0.0227	0.37	0.65	0.414	3.83	1.087	14.01	5.65	30.63	7.57	83.2	21.24	10750	0.09
AC25	RIM	AC25 RIM	191024	191024_112_LC1033	LC1033	30	5	3.5	0.173	0.01	0.02574	0.00043	0.26929	0.0486	0.0029	161.1	9.1	163.8	2.7	110	120	<0.56	153000	60	<430	3.5	<0.075	<9.9	383	435900	0.55		<0.018	0.0107	20.63	0.0426	0.65	1.29	0.719	7.3	2.16	26.3	10.78	58.8	14.23	152.4	38.9	10180	0.117
AC25	CORE	AC25 CORE	191024	191024_113_LC1034	LC1034	30	5	3.5	0.191	0.014	0.02647	0.00046	0.00076881	0.0527	0.004	177	12	168.4	2.9	240	150	<0.66	153000	96	<510	4.09	0.102	<12	617	429900	0.692		<0.099	0.0079	22.22	0.127	1.76	3.54	1.26	16.2	4.47	50	18.9	93.8	20.97	210.3	48.4	10380	0.193
AC25	RIM	AC25 RIM	191024	191024_115_LC1035	LC1035	30	5	3.5	0.187	0.011	0.02631	0.00045	0.083109	0.0517	0.0031	173.8	9.7	167.4	2.8	230	130	<0.68	153000	64	<510	3.65	<0.096	<12	368.9	429500	0.642		<0.087	<0.0045	20.08	0.0325	0.69	1.37	0.6	7.48	2.26	28.6	11.04	58.4	13.23	138.5	32.72	10380	0.199
AC25	RIM	AC25 RIM	191024	191024_116_LC1036	LC1036	30	5	3.5	0.162	0.012	0.02504	0.00059	0.1428	0.0465	0.0034	152	11	159.4	3.7	30	150	<0.67	153000	155	<510	6.67	0.74	<11	929	452500	1.012		<0.099	0.008	28.41	0.151	2.91	5.35	1.43	25.8	7.43	84.6	30.02	142.9	30.33	282	59.5	10500	0.301
AC25	CORE	AC25 CORE	191024	191024_117_LC1037	LC1037	30	5	3.5
AC25	RIM	AC25 RIM	191024	191024_118_LC1038	LC1038	30	5	3.5	0.196	0.017	0.02678	0.00053	0.011956	0.0534	0.0047	180	14	170.4	3.3	250	180	1.96	153000	28	<500	2.36	<0.1	<11	152.6	436800	0.273		<0.15	0.0089	11.13	0.0149	0.274	0.65	0.249	2.6	0.85	10.47	4.37	23.52	5.97	66.2	18.05	11150	0.076
AC25	CORE	AC25 CORE	191024	191024_125_LC1039	LC1039	30	5	3.5	0.174	0.018	0.02584	0.00062	0.081759	0.0492	0.005	161	15	164.4	3.9	80	200	<0.65	153000	98	<520	4.9	0.157	<12	450.4	453500	0.608		<0.022	<0.0081	16.41	0.054	0.84	2.07	0.616	10.35	3.09	36.9	14.07	70.3	15.87	155.5	35.75	10650	0.201
AC25	RIM	AC25 RIM	191024	191024_126_LC1040	LC1040	30	5	3.5	0.185	0.014	0.02526	0.00049	0.067288	0.0533	0.0042	171	12	160.8	3.1	280	160	0.82	153000	82	<490	3.76	0.108	<10	361.9	468000	0.572		<0.12	0.17	18.99	0.042	0.58	1.23	0.601	6.26	1.868	25.2	10.42	58.1	13.78	150.2	38.7	10860	0.161
AC25	CORE	AC25 CORE	191024	191024_127_LC1041	LC1041	30	5	3.5	0.217	0.021	0.02683	0.00068	0.02097	0.0589	0.0057	197	17	170.7	4.3	430	200	530	153000	231	<540	10.8	0.262	37	487	442700	0.58		3.11	0.61	15.36	0.165	1.7	2.58	0.783	11.79	3.54	40.3	15.3	74.1	16.57	158.3	35.97	10170	0.2
AC25	RIM	AC25 RIM	191024	191024_128_LC1042	LC1042	30	5	3.5	0.175	0.012	0.02468	0.00045	0.06888	0.0518	0.0039	163	10	157.1	2.8	210	150	0.72	153000	98	<520	3.17	0.108	<10	486	454400	0.459		<0.1	0.127	18.28	0.15	1.78	3	1.16	11.7	3.21	36.9	14.6	75.3	17.2	186	47.3	10640	0.112
AC25	CORE	AC25 CORE	191024	191024_130_LC1043	LC1043	30	5	3.5	0.167	0.027	0.02506	0.00071	0.09854	0.0486	0.0077	155	23	159.5	4.5	30	290	1.82	153000	99	<570	7.4	0.59	<13	344.8	442000	0.464		<0.15	<0.0096	12.35	0.033	0.62	1.44	0.429	7.39	2.29	28.3	10.44	53.3	12.02	117.6	26.88	10630	0.198
AC25	RIM	AC25 RIM	191024	191024_131_LC1044	LC1044	30	5	3.5	0.176	0.022	0.02499	0.00083	0.11052	0.052	0.0069	163	19	159.1	5.2	170	260	2.1	153000	149	<700	9	0.39	<16	316.6	451400	0.699		<0.19	<0.0066	15.46	0.0216	0.39	1.27	0.321	6.37	2.16	25.9	9.79	50.9	11.07	113.5	24.64	11490	0.298
AC25	RIM	AC25 RIM	191024	191024_132_LC1045	LC1045	30	5	3.5	0.201	0.023	0.02597	0.00091	0.060919	0.0569	0.0073	185	20	165.2	5.7	360	260	0.72	153000	103	<490	5.45	0.286	<11	354	470000	0.591		<0.073	<0.0016	18.2	0.0292	0.53	1.58	0.463	7.21	2.43	29.2	11.22	57.3	12.68	125.3	27.1	10920	0.22
AC25	CORE	AC25 CORE	191024	191024_133_LC1046	LC1046	30	5	3.5	0.182	0.016	0.02746	0.00048	0.18018	0.0481	0.004	169	13	174.6	3	80	170	<0.61	153000	139	<510	5.31	0.215	<11	573.8	452000	1.23		<0.069	0.149	30.69	0.075	0.85	2.62	0.67	13	3.84	46.7	18.27	89.2	19.86	195.6	42.65	10790	0.378
AC25	RIM	AC25 RIM	191024	191024_135_LC1047	LC1047	30	5	3.5	0.198	0.018	0.02471	0.00074	0.17848	0.0583	0.0053	182	15	157.4	4.7	450	190	8.3	153000	63	<690	3.95	0.32	96	231.5	463900	0.385		5.4	0.055	14.02	0.034	0.43	0.87	0.412	4.14	1.35	15.73	6.39	35.7	8.63	94.4	24.83	11280	0.092
AC25	CORE	AC25 CORE	191024	191024_136_LC1048	LC1048	30	5	3.5	0.19	0.012	0.02491	0.00052	0.15525	0.0554	0.0035	176	10	158.6	3.3	380	140	0.76	153000	133	<490	5.53	0.238	<10	837	444700	1.47		0.87	0.0186	38.66	0.099	1.68	3.92	1.22	18.76	5.69	69.2	26.46	129	28.51	271.6	61.2	10540	0.445
AC25	RIM	AC25 RIM	191024	191024_137_LC1049	LC1049	30	5	3.5	0.165	0.01	0.02554	0.00052	0.080287	0.0462	0.0028	154.2	9.1	162.5	3.3	20	130	47	153000	52	<490	2.98	<0.094	<11	192.5	440500	0.3		<0.11	0.056	12.91	0.029	0.44	0.64	0.354	3.65	1.05	13.83	5.48	30	7.23	81.1	20.87	10590	0.094
AC25	CORE	AC25 CORE	191024	191024_138_LC1050	LC1050	30	5	3.5	0.186	0.02	0.02601	0.00055	0.27402	0.052	0.0055	172	17	165.5	3.5	200	210	47	153000	90	<500	8.1	0.68	12.3	361.8	434900	0.647		0.23	0.181	17.8	0.064	0.91	1.55	0.545	7.77	2.32	27.63	10.94	56.2	12.89	130.1	29.56	10280	0.217
AC25	RIM	AC25 RIM	191024	191024_140_LC1051	LC1051	30	5	3.5	0.232	0.026	0.0276	0.0011	0.13157	0.062	0.0075	211	21	175.3	7.2	560	250	32	153000	<29	<580	3.5	<0.12	<13	102.4	416000	0.216		<0.091	0.263	7.24	0.0116	0.17	0.203	0.168	1.75	0.464	6.35	2.71	16.26	4.19	46.9	13.59	10310	0.049
AC25	CORE	AC25 CORE	191024	191024_141_LC1052	LC1052	30	5	3.5	0.187	0.02	0.02551	0.00099	0.044336	0.054	0.006	173	17	162.4	6.3	290	230	4.57	153000	124	<560	5.5	2.74	35	623	418900	0.482		1.34	0.031	17.12	0.105	1.85	4.25	1.2	18	4.98	55.7	19.83	92.4	20.01	188.2	39.5	9720	0.171
AC25	RIM	AC25 RIM	191024	191024_142_LC1053	LC1053	30	5	3.5	0.177	0.013	0.02598	0.00055	0.18699	0.0496	0.0037	165	12	165.3	3.5	130	150	0.91	153000	81	<460	4.27	0.096	<10	313	444400	0.564		<0.079	0.03	19.79	0.0335	0.55	1.2	0.445	6.2	1.91	23.8	9.46	48.6	11.47	118.2	27.7	10770	0.203
AC25	CORE	AC25 CORE	191024	191024_143_LC1054	LC1054	30	5	3.5	0.182	0.015	0.02551	0.00051	0.11237	0.051	0.0039	169	13	162.4	3.2	210	160	<0.59	153000	130	<450	5.83	0.266	<10	619	453600	0.609		<0.06	0.0076	17.47	0.092	1.59	3.24	1.118	15.86	4.68	53.9	19.58	94.5	20.76	199.5	43	10370	0.205
AC25	RIM	AC25 RIM	191024	191024_145_LC1055	LC1055	30	5	3.5	0.182	0.011	0.02587	0.00052	0.090108	0.0512	0.0031	169.1	9.1	164.6	3.3	210	130	0.66	153000	74	<460	4.73	1.05	25.1	448	436400	1.171		0.153	0.011	41.3	0.184	2.28	4	1.23	13.99	3.56	39.3	13.98	68.9	14.8	147.9	33.2	10350	0.252
AC25	CORE	AC25 CORE	191024	191024_146_LC1056	LC1056	30	5	3.5
AC25	RIM	AC25 RIM	191024	191024_147_LC1057	LC1057	30	5	3.5	0.173	0.011	0.02507	0.00045	0.018104	0.0496	0.0032	161.7	9.8	159.6	2.9	160	140	0.63	153000	218	<440	4.24	0.133	<9.2	332.8	455300	0.711		<0.088	0.43	19.18	0.092	0.86	1.4	0.59	6.02	1.943	24.72	9.89	51.7	12.3	126.7	30.52	10810	0.198
AC25	CORE	AC25 CORE	191024	191024_148_LC1058	LC1058	30	5	3.5
AC25	RIM	AC25 RIM	191024	191024_155_LC1059	LC1059	30	5	3.5	0.167	0.012	0.02523	0.00049	0.16346	0.0481	0.0034	156	10	160.6	3.1	80	150	<0.69	153000	179	<510	7.29	0.335	<10	631	454100	0.993		<0.065	0.071	26.31	0.069	1.28	2.87	0.884	14.03	4.32	52	19.37	100	21.56	206.7	45.1	10430	0.317
AC25	CORE	AC25 CORE	191024	191024_156_LC1060	LC1060	30	5	3.5	0.174	0.014	0.02528	0.00044	0.17731	0.0502	0.0042	162	12	160.9	2.7	150	170	12.7	153000	103	<470	4.64	0.171	<10	511.3	463200	1.004		0.062	0.0068	26.57	0.0555	0.95	2.13	0.73	10.64	3.27	40.3	15.49	80.9	18.18	182.3	42.1	10980	0.368
AC25	RIM	AC25 RIM	191024	191024_157_LC1061	LC1061	30	5	3.5	0.172	0.013	0.02539	0.0004	0.14542	0.049	0.0038	160	11	161.6	2.5	100	150	0.71	153000	80	<480	3.56	<0.092	<9.5	424	452200	0.725		<0.081	0.045	22.7	0.049	0.92	1.5	0.679	7.48	2.22	30	12.13	66.8	16.1	174.8	44	10560	0.155
AC25	CORE	AC25 CORE	191024	191024_158_LC1062	LC1062	30	5	3.5	0.175	0.02	0.02582	0.00092	0.30815	0.0496	0.0053	163	17	164.3	5.8	160	230	1.19	153000	147	<490	9.4	0.48	<11	593	482000	0.599		<0.028	0.0147	17.21	0.109	1.78	3.98	1.1	17	4.83	54	18.93	89.8	19.17	177.7	37.5	10670	0.231
AC25	RIM	AC25 RIM	191024	191024_160_LC1063	LC1063	30	5	3.5	0.169	0.016	0.02557	0.00056	0.059091	0.0483	0.0047	157	14	162.8	3.5	50	190	<0.69	153000	90	<520	4.72	0.159	<11	335.2	449600	0.59		0.055	<0.0046	18.73	0.0297	0.65	1.62	0.526	7.22	2.29	26.7	10.27	51.7	11.6	118.3	26.34	11050	0.251
AC25	RIM	AC25 RIM	191024	191024_161_LC1064	LC1064	30	5	3.5	0.178	0.013	0.02574	0.00051	0.087216	0.0504	0.0038	166	11	163.8	3.2	150	150	<0.71	153000	76	<510	3.36	0.501	<11	398.9	446200	0.516		<0.085	0.0217	18.5	0.06	0.49	1.56	0.534	7.74	2.24	28.9	11.59	61	14.78	164.2	40.7	10660	0.156
AC25	RIM	AC25 RIM	191024	191024_162_LC1065	LC1065	30	5	3.5	0.174	0.013	0.02347	0.00059	0.27007	0.0546	0.004	164	12	149.5	3.7	320	150	42	153000	70	<600	14.7	1.03	27.9	478	466900	0.663		7	0.059	23.7	0.0461	0.85	1.77	0.95	9.47	2.78	33.7	13.77	74.2	17.38	181.3	45.7	10970	0.174
AC25	RIM	AC25 RIM	191024	191024_163_LC1066	LC1066	30	5	3.5	0.181	0.015	0.02482	0.00047	0.18431	0.0527	0.0041	168	13	158	2.9	280	170	5.1	153000	74	<550	3.25	0.479	<11	522	453500	0.332		0.26	0.0273	18.16	0.197	2.53	4.02	1.56	15.01	3.7	42.2	15.28	77.8	17.57	181.3	43.59	10720	0.121
AC25	CORE	AC25 CORE	191024	191024_165_LC1067	LC1067	30	5	3.5	0.1656	0.007	0.02482	0.00033	0.25775	0.0479	0.0018	155.3	6	158	2.1	99	85	24	153000	200	<470	4.12	0.215	<10	1226	449800	2.33		<0.06	0.0163	64.5	0.136	2.39	5.52	1.52	28.7	8.55	101.9	38.7	192	41.5	399	86.5	10950	0.588
AC25	RIM	AC25 RIM	191024	191024_166_LC1068	LC1068	30	5	3.5	0.174	0.011	0.02566	0.00044	0.1922	0.0493	0.003	162.4	9.2	163.3	2.8	150	130	<0.58	153000	65	<450	3.04	0.1	<9.3	411	459000	0.69		<0.087	0.0051	18.94	0.034	0.55	1.36	0.565	6.85	2.226	28.54	11.81	64.8	15.65	169.4	42.35	10460	0.185
AC22	CORE	AC22 CORE	191024	191024_167_LC1069	LC1069	30	5	3.5	0.201	0.017	0.02467	0.00062	0.45013	0.0589	0.0044	185	14	157.1	3.9	490	170	6090	153000	195	530	21.1	1.05	39.2	934	404100	0.64		0.32	0.08	16.53	0.301	4.28	5.91	1.59	28.3	7.54	86.2	29.46	135.5	27.52	250.2	53.9	7910	0.248
AC22	RIM	AC22 RIM	191024	191024_168_LC1070	LC1070	30	5	3.5	0.176	0.021	0.02572	0.00073	0.20818	0.0497	0.0057	162	18	163.7	4.6	80	220	2.88	153000	160	<430	12.14	0.374	<8.9	364.1	448200	0.53		<0.072	<0.0044	13.86	0.0511	0.96	2.1	0.526	9.34	2.97	32.1	11.37	55.2	12.06	115.4	24.73	9690	0.222
AC22	CORE	AC22 CORE	191024	191024_170_LC1071	LC1071	30	5	3.5	0.178	0.016	0.02575	0.00059	0.03959	0.052	0.0053	165	14	163.9	3.7	210	200	69	153000	207	<400	10.3	0.401	8.8	706	447000	0.676		0.22	0.0152	17.56	0.126	2.45	4.41	1.202	19.76	5.53	64.7	22.7	106.6	22.94	218.9	45.7	9580	0.23
AC22	RIM	AC22 RIM	191024	191024_171_LC1072	LC1072	30	5	3.5
AC22	CORE	AC22 CORE	191024	191024_172_LC1073	LC1073	30	5	3.5
AC22	RIM	AC22 RIM	191024	191024_173_LC1074	LC1074	30	5	3.5	0.264	0.018	0.02343	0.00065	0.42817	0.0838	0.0072	237	14	149.3	4.1	1160	160	50	153000	165	<550	18.4	22.8	40	788	448700	1.05		0.47	0.72	25.73	1.43	10.1	9.9	3.46	26.1	7	73.8	24.5	115.2	24.37	237.1	52.6	10980	0.309
YM43	CORE	YM43 CORE	191024	191024_175_LC1075	LC1075	30	5	3.5	0.1764	0.0094	0.02636	0.00046	0.17592	0.0486	0.0026	164.5	8.1	167.7	2.9	130	120	<0.91	153000	210	<620	5.78	0.412	<13	1778	451300	2.18		<0.1	0.0186	59.7	0.281	4.63	9.56	2.73	46.9	13.71	158.6	56.9	270	57	540	109.9	10550	0.543
YM43	RIM	YM43 RIM	191024	191024_176_LC1076	LC1076	30	5	3.5	0.183	0.016	0.02616	0.00056	0.24452	0.0507	0.0043	170	14	166.5	3.5	170	180	<0.86	153000	105	<630	3.74	<0.12	<14	408.2	456600	0.701		<0.14	<0.0074	23.41	0.041	1	1.84	0.607	8.72	2.62	31.7	12.17	63.5	14.65	148.5	34.3	11070	0.228
YM43	CORE	YM43 CORE	191024	191024_177_LC1077	LC1077	30	5	3.5	0.161	0.016	0.02573	0.00062	0.087682	0.0459	0.0049	150	14	163.8	3.9	-40	200	<0.76	153000	158	<590	7.8	0.215	<12	562	466200	0.967		<0.12	<0.0069	21.98	0.055	0.94	2.43	0.738	12	3.77	44.2	17.41	90.1	19.69	195.3	43	10030	0.297
YM43	RIM	YM43 RIM	191024	191024_178_LC1078	LC1078	30	5	3.5	0.161	0.017	0.02565	0.00054	0.024119	0.0458	0.0048	150	15	163.2	3.4	-20	200	<0.78	153000	77	<560	3.63	<0.09	<12	236.9	446900	0.468		<0.14	<0.0071	14.52	0.0195	0.38	0.9	0.397	4.82	1.459	18.41	7.01	37	8.77	87.2	20.8	10920	0.147
YM43	CORE	YM43 CORE	191024	191024_185_LC1079	LC1079	30	5	3.5	0.248	0.038	0.0266	0.001	0.26777	0.067	0.01	221	31	169.3	6.4	640	320	343	153000	<40	<810	2.48	0.17	<19	185.4	446000	0.225		2.03	0.184	9.75	0.064	0.29	1	0.293	3.71	1.05	12.5	5.22	29.2	7.25	81	21.64	11130	0.088
YM43	RIM	YM43 RIM	191024	191024_186_LC1080	LC1080	30	5	3.5	0.17	0.012	0.0253	0.00052	0.30587	0.0487	0.0033	159	10	161.1	3.3	110	140	<0.82	153000	83	<580	3.48	0.128	<13	479	451600	0.696		<0.1	0.23	25.4	0.107	1.23	1.98	0.83	9.01	2.71	33.3	13.68	74.5	18.12	192.1	50.5	10410	0.151
YM43	CORE	YM43 CORE	191024	191024_187_LC1081	LC1081	30	5	3.5	0.213	0.02	0.02785	0.0007	0.20551	0.0559	0.0057	195	16	177.1	4.4	380	200	7.7	153000	115	<670	4.1	0.22	<13	1067	441700	0.676		<0.19	0.073	52.1	0.424	7.3	10.9	3.74	35	8.22	92.4	33.3	164	35.5	345	80.2	10110	0.102
YM43	RIM	YM43 RIM	191024	191024_188_LC1082	LC1082	30	5	3.5	0.1802	0.0094	0.02557	0.00058	0.36385	0.0513	0.0026	167.7	8.1	162.7	3.6	220	110	280	153000	161	<570	9.4	0.145	18	742	450800	1.02		3	0.306	51.7	0.218	3.04	4.97	2.06	18.7	4.85	55.5	21.4	112.7	25.1	265	62.9	10010	0.171
YM43	CORE	YM43 CORE	191024	191024_190_LC1083	LC1083	30	5	3.5	0.178	0.01	0.02584	0.0006	0.20882	0.05	0.0028	165.5	8.8	164.4	3.8	190	130	45	153000	239	<690	5.8	0.76	21	1940	449200	2.07		0.129	0.041	60.8	0.26	4.35	10.84	2.62	57	16.7	184	65.1	298	59.9	542	107.7	10760	0.613
YM43	RIM	YM43 RIM	191024	191024_191_LC1084	LC1084	30	5	3.5	0.191	0.025	0.02616	0.00078	0.20716	0.0528	0.007	176	21	166.4	4.9	220	260	<0.98	153000	108	<690	5.6	0.17	<14	332	454000	0.488		<0.15	<0.0086	16.43	0.032	0.58	1.48	0.53	7.55	2.15	26.8	9.99	51.5	11.89	119	27.6	10440	0.161
YM43	CORE	YM43 CORE	191024	191024_192_LC1085	LC1085	30	5	3.5	0.51	0.11	0.02815	0.00094	0.94525	0.118	0.015	391	56	178.9	5.9	1820	280	21	153000	59	<520	5.9	1.71	19	432	455400	0.353		1.01	0.126	14.69	0.139	1.81	2.66	1.14	11	2.99	34.8	12.81	65.4	14.99	157.6	38	10650	0.153
YM43	RIM	YM43 RIM	191024	191024_193_LC1086	LC1086	30	5	3.5	0.205	0.019	0.02528	0.00075	0.092106	0.0591	0.0056	188	16	160.9	4.7	490	210	1.28	153000	49	<530	3.58	0.143	<11	366.2	453000	0.484		0.4	0.026	15.4	0.044	0.69	1.18	0.569	6.18	1.98	24.5	10.41	57.7	13.97	152	39.5	10310	0.101
YM43	CORE	YM43 CORE	191024	191024_195_LC1087	LC1087	30	5	3.5	0.173	0.015	0.02557	0.0007	0.29812	0.049	0.0039	162	13	162.7	4.4	120	160	390	153000	157	<700	10	0.51	37	913	426000	2.29		3	0.141	52.7	0.112	1.78	4.35	1.12	23.6	7.18	80	29.4	143.8	31.3	291	61.9	10350	0.759
YM43	RIM	YM43 RIM	191024	191024_196_LC1088	LC1088	30	5	3.5	0.175	0.017	0.02606	0.00064	0.16793	0.0479	0.0045	162	15	165.8	4	70	190	<0.84	153000	102	<590	4.98	0.208	<12	431.1	455000	0.71		<0.1	0.0044	23.09	0.041	0.82	1.93	0.661	9.98	2.92	34.4	12.96	69.7	15.59	151.6	34.6	10670	0.254
YM43	CORE	YM43 CORE	191024	191024_197_LC1089	LC1089	30	5	3.5	0.275	0.049	0.02679	0.00093	0.37017	0.074	0.012	242	37	170.4	5.8	860	320	1.3	153000	48	<780	4.1	0.22	<16	283.4	437900	0.479		0.17	0.05	12.61	0.049	0.3	1.35	0.307	5.42	1.81	21.2	8.66	43	10.3	109.3	25.6	10740	0.21
YM43	RIM	YM43 RIM	191024	191024_198_LC1090	LC1090	30	5	3.5	0.232	0.019	0.02625	0.00073	2.6302e-05	0.0643	0.0056	210	16	167	4.6	650	180	7.9	153000	51	<680	4.7	0.7	29	392	456600	0.807		1.04	0.104	22.65	0.126	1.04	1.29	0.55	6.49	2.07	27.5	11.45	60.2	15.19	165	40.6	11470	0.253
YM43	RIM	YM43 RIM	191024	191024_200_LC1091	LC1091	30	5	3.5	0.21	0.031	0.0241	0.001	0.32636	0.0633	0.0086	192	26	153.4	6.5	600	300	86	153000	80	<720	4.2	1.07	133	324.5	461800	0.43		0.21	0.063	12.21	0.107	0.74	1.69	0.62	5.09	1.56	20.68	8.97	51.8	12.8	137.6	36.6	10500	0.113
YM43	CORE	YM43 CORE	191024	191024_201_LC1092	LC1092	30	5	3.5	0.204	0.021	0.02541	0.00071	0.2008	0.0585	0.0059	188	17	161.7	4.5	480	210	159	153000	170	<630	7.2	0.82	<13	1263	428000	1.52		0.92	0.064	46.4	0.264	4.4	10.17	2.68	42.2	12.18	129.7	42.2	192.6	39.3	346	68.6	10270	0.425
YM43	RIM	YM43 RIM	191024	191024_202_LC1093	LC1093	30	5	3.5	0.19	0.011	0.02673	0.00052	0.18022	0.0515	0.003	175.8	9.6	170	3.3	230	130	63	153000	54	<490	3.97	<0.11	<11	183.4	451000	0.591		0.16	0.0054	14.42	0.0146	0.46	0.79	0.291	4.27	1.319	15.26	5.54	29	6.43	62.9	15.45	10550	0.163
YM43	CORE	YM43 CORE	191024	191024_203_LC1094	LC1094	30	5	3.5	0.168	0.019	0.02638	0.00074	0.057788	0.0468	0.0055	155	16	167.8	4.7	-30	220	2.89	153000	136	<610	6.64	0.429	<13	554	460000	0.797		0.3	0.057	19.42	0.063	0.94	2.48	0.726	12.85	4	47.5	17.8	87.8	18.99	186.5	40.6	10590	0.328
YM43	RIM	YM43 RIM	191024	191024_205_LC1095	LC1095	30	5	3.5	0.187	0.018	0.02615	0.00072	0.035454	0.0523	0.0053	173	15	166.4	4.5	210	200	<0.92	153000	92	<660	5	<0.12	<12	322.8	444200	0.673		<0.094	<0.0062	17.8	0.025	0.47	1.32	0.359	6.51	2.14	26.6	10.25	51.3	11.2	113.9	24.87	11280	0.259
YM43	CORE	YM43 CORE	191024	191024_206_LC1096	LC1096	30	5	3.5	0.175	0.019	0.02757	0.00089	0.16145	0.0467	0.0054	162	16	175.3	5.6	-20	210	47	153000	132	<510	6.52	0.67	<11	523	476000	0.686		0.46	0.082	19.78	0.099	1.65	3.05	0.814	13.22	3.95	46.3	16.7	79.9	17.33	164.2	36	11170	0.211
YM43	RIM	YM43 RIM	191024	191024_207_LC1097	LC1097	30	5	3.5	0.184	0.013	0.02628	0.00054	0.181	0.0512	0.004	170	11	167.2	3.4	180	160	<0.63	153000	94	<460	4.75	0.139	<9	378.9	444900	0.658		<0.076	<0.0053	20.66	0.039	0.77	1.79	0.739	9.96	2.94	33.4	12.26	57.3	12.68	124.1	27.46	10960	0.221
YM43	CORE	YM43 CORE	191024	191024_215_LC1099	LC1099	30	5	3.5
YM43	RIM	YM43 RIM	191024	191024_216_LC1100	LC1100	30	5	3.5	0.202	0.017	0.02599	0.00074	0.2068	0.0564	0.0047	186	15	165.4	4.6	390	180	7.5	153000	114	<480	9.2	0.87	18.6	569	457400	0.69		0.55	0.133	22.58	0.075	1.62	3.15	0.86	14.76	4.26	48.5	18.07	87	18.89	184.6	39.9	11010	0.288
YM43	CORE	YM43 CORE	191024	191024_217_LC1101	LC1101	30	5	3.5	0.188	0.019	0.02764	0.00071	0.23887	0.0494	0.0049	174	16	175.8	4.5	120	200	1.41	153000	76	<560	4.58	0.216	<12	583	432000	0.442		0.27	0.071	18.9	0.134	1.88	3.02	1.44	14.6	3.99	45.1	17.2	90.3	20.9	215	53.3	10060	0.17
YM43	RIM	YM43 RIM	191024	191024_218_LC1102	LC1102	30	5	3.5	0.181	0.015	0.02656	0.00052	0.011596	0.0496	0.0042	167	13	168.9	3.3	110	170	13.6	153000	156	<440	4.75	0.126	22.1	270.4	443400	0.462		1.07	0.82	17.3	0.22	1.25	1.09	0.475	5.25	1.551	19.53	7.87	42.3	10.29	111.8	27.91	10370	0.205
YM43	CORE	YM43 CORE	191024	191024_220_LC1103	LC1103	30	5	3.5	0.161	0.022	0.02586	0.00086	0.1757	0.044	0.0059	149	19	164.6	5.4	-120	240	<0.63	153000	126	<480	7.21	0.192	<9.8	434	453200	0.571		0.02	<0.0049	12.15	0.0381	0.74	2.1	0.686	10.36	3.13	36	13.67	67.8	14.96	147.6	32.2	9770	0.238
YM43	RIM	YM43 RIM	191024	191024_221_LC1104	LC1104	30	5	3.5	0.189	0.019	0.02685	0.00068	0.061998	0.0509	0.0051	174	16	170.8	4.3	150	180	<0.63	153000	78	<450	4.47	0.191	<8.6	263	448300	0.42		<0.086	<0.0045	13.18	0.0159	0.32	0.93	0.332	4.89	1.674	19.79	7.85	41.3	9.57	96.7	22.5	10620	0.156
YM43	CORE	YM43 CORE	191024	191024_222_LC1105	LC1105	30	5	3.5	0.198	0.019	0.02718	0.00079	0.073444	0.0524	0.0049	182	16	172.8	5	240	200	172	153000	115	<570	8	0.165	19.4	546	455100	0.682		1.03	0.055	16.06	0.083	1.74	3.29	0.99	13.29	4.09	46.6	16.98	84.5	18.31	179	39.7	10190	0.238
YM43	RIM	YM43 RIM	191024	191024_223_LC1106	LC1106	30	5	3.5	0.193	0.018	0.0282	0.00071	0.14505	0.0503	0.005	178	15	179.3	4.5	120	190	<0.68	153000	82	<510	4.54	<0.098	<11	280.7	454400	0.529		<0.087	<0.0036	14.35	0.0249	0.3	1.18	0.397	5.8	1.728	22.11	8.28	44.2	9.92	102.7	23.43	11320	0.202
YM43	CORE	YM43 CORE	191024	191024_225_LC1107	LC1107	30	5	3.5	0.2546	0.0087	0.03544	0.0006	0.21858	0.0522	0.0018	229.9	7	224.5	3.7	272	78	198	153000	306	<450	9.5	0.351	30.6	1530	452100	1.188		5.5	0.235	15	0.23	3.58	5.48	1.87	31.1	9.92	123	48.5	250	55.8	555	129	9450	0.521
YM43	RIM	YM43 RIM	191024	191024_226_LC1108	LC1108	30	5	3.5	0.219	0.022	0.02896	0.00084	0.28243	0.0555	0.0062	199	18	184	5.3	320	220	6.79	153000	69	<590	3.37	1.96	<11	224.3	479000	0.378		1.1	0.088	7.88	0.057	0.36	0.93	0.336	3.31	1.19	15.52	6.55	37.1	8.91	98.1	26.03	12180	0.175
YM43	CORE	YM43 CORE	191024	191024_227_LC1109	LC1109	30	5	3.5
YM43	RIM	YM43 RIM	191024	191024_228_LC1110	LC1110	30	5	3.5	0.172	0.014	0.02636	0.00052	0.21546	0.0474	0.0036	160	12	167.7	3.3	40	150	<0.59	153000	124	<430	5.52	0.223	<9.4	414	463900	0.608		<0.019	0.028	19.83	0.0464	0.83	1.73	0.601	9.06	2.85	33.3	12.98	64.1	14.15	140.8	31.58	10970	0.248
YM43	CORE	YM43 CORE	191024	191024_230_LC1111	LC1111	30	5	3.5	0.175	0.021	0.02672	0.00081	0.051752	0.0481	0.0062	162	18	169.9	5.1	30	240	<0.81	153000	63	<530	4.05	<0.1	<11	392	446900	0.689		<0.12	<0.009	19.07	0.0325	0.6	1.45	0.524	7.73	2.39	29.8	12.04	63.1	14.32	148.6	33.7	10520	0.207
YM43	RIM	YM43 RIM	191024	191024_231_LC1112	LC1112	30	5	3.5	0.175	0.012	0.02668	0.00055	0.083171	0.0476	0.0034	163	11	169.8	3.4	60	140	4.5	153000	81	<440	3.49	0.151	<8.3	369	463000	0.725		<0.075	<0.0057	21.28	0.052	0.83	1.68	0.503	7.99	2.31	29.1	11.25	59.3	13.45	137.1	31.3	11070	0.216
YM43	CORE	YM43 CORE	191024	191024_232_LC1113	LC1113	30	5	3.5	0.195	0.021	0.0268	0.0006	0.093295	0.053	0.0058	180	18	170.5	3.8	240	220	161	153000	201	<670	14.7	0.55	<14	1353	457000	1.02		2.42	0.058	22.3	0.271	3.82	7.23	2.3	35.1	10.8	126.5	44.3	206.3	41.6	377	77.9	9240	0.279
YM43	RIM	YM43 RIM	191024	191024_233_LC1114	LC1114	30	5	3.5	0.181	0.013	0.02768	0.00058	0.037683	0.0484	0.0037	170	12	176	3.7	80	150	<0.61	153000	153	<470	6.23	0.245	<9.2	409	432600	0.91		<0.02	<0.0059	18.34	0.0319	0.52	1.68	0.445	9.2	2.81	33	12.63	63.3	14.35	142.5	31.1	11580	0.384
YM43	CORE	YM43 CORE	191024	191024_235_LC1115	LC1115	30	5	3.5	0.186	0.018	0.02684	0.00071	0.12214	0.0502	0.005	172	16	170.7	4.4	140	200	136	153000	201	<540	10.9	0.473	<12	781	456000	0.736		1.04	0.198	21.9	0.209	3	4.81	1.16	22	6.24	70.7	25.4	120.5	25.2	230	48.5	10400	0.26
YM43	RIM	YM43 RIM	191024	191024_236_LC1116	LC1116	30	5	3.5	0.174	0.014	0.0266	0.00061	0.19624	0.0473	0.004	162	12	169.2	3.8	50	170	<0.7	153000	121	<490	4.79	0.19	<10	444.5	449700	0.76		<0.083	<0.0044	23.6	0.0368	0.67	1.98	0.62	10.57	2.93	35.9	13.6	68.9	15.25	148.9	32.42	10960	0.304
YM43	CORE	YM43 CORE	191024	191024_237_LC1117	LC1117	30	5	3.5	0.195	0.016	0.0246	0.0022	0.33091	0.0591	0.0066	180	14	156	14	520	230	15.5	153000	159	<600	9	0.53	47	707	503000	0.89		1.26	0.258	25.2	0.127	1.99	3.78	0.91	17.1	5.32	64.6	22.8	112	23.7	231	48.1	11230	0.42
YM43	RIM	YM43 RIM	191024	191024_238_LC1118	LC1118	30	5	3.5	0.186	0.013	0.02644	0.00046	0.018591	0.0522	0.004	175	12	168.2	2.9	220	150	5.6	153000	131	<460	5.06	0.201	<9.7	367.2	447900	0.616		0.237	0.55	21.91	0.192	1.08	1.77	0.496	7.95	2.472	29.4	11.02	57	12.72	125.9	28.15	10780	0.208
YM43	CORE	YM43 CORE	191024	191024_245_LC1119	LC1119	30	5	3.5	0.232	0.012	0.03431	0.00052	0.30336	0.0491	0.0024	211	10	217.5	3.2	130	100	1.6	153000	429	<480	5.49	0.109	<9.8	1159	457000	1.41		<0.093	0.093	13.46	0.085	1.45	2.81	0.85	17	5.93	82.8	35.2	195	46.5	474	109.6	9360	0.509
YM43	RIM	YM43 RIM	191024	191024_246_LC1120	LC1120	30	5	3.5	0.237	0.015	0.03496	0.00063	0.13564	0.0494	0.0031	215	12	221.5	3.9	130	130	0.95	153000	194	<480	3.1	<0.081	<8.6	542.4	454600	0.917		<0.02	0.042	8.37	0.045	0.63	1.2	0.32	7.34	2.79	38.7	16.84	92.3	21.96	230.9	54.7	10790	0.441
YM43	RIM	YM43 RIM	191024	191024_247_LC1121	LC1121	30	5	3.5	0.284	0.034	0.02606	0.00062	0.057993	0.08	0.0095	249	26	165.8	3.9	1060	210	25.3	153000	125	<550	14	1.64	61	468	429000	0.9		3.4	0.267	25.1	0.136	1.66	2.33	0.71	10.31	3.1	37.3	14.1	71.7	15.5	153.3	33.2	9820	0.387
YM43	CORE	YM43 CORE	191024	191024_248_LC1122	LC1122	30	5	3.5	0.1746	0.0086	0.0254	0.00055	0.25779	0.0498	0.0024	163.2	7.5	161.7	3.4	170	110	0.88	153000	303	<470	8	3.57	14	3537	466000	3.56		0.29	0.054	109.2	0.577	9.2	23.4	5.61	111.9	31.5	344.3	114.8	516	101.7	890	175.6	10440	0.951
YM43	RIM	YM43 RIM	191024	191024_250_LC1123	LC1123	30	5	3.5	0.175	0.013	0.02618	0.00054	0.2435	0.0485	0.0037	162	11	166.6	3.4	90	150	10	153000	95	<440	5.39	0.118	<9.3	307.6	447000	0.625		0.069	0.022	16.65	0.0351	0.45	1.18	0.472	6.35	1.934	23.8	9.26	47.4	11.26	115	26.98	10930	0.245
YM43	CORE	YM43 CORE	191024	191024_251_LC1124	LC1124	30	5	3.5	0.195	0.014	0.02588	0.00053	0.0048279	0.054	0.0038	180	12	164.7	3.3	320	150	336	153000	152	<450	9.2	1.3	26	639	459000	0.801		1.65	0.115	22.38	0.087	1.46	3.23	0.88	15.4	4.58	53.9	19.8	97.5	20.96	200.9	43.7	11130	0.291
YM43	RIM	YM43 RIM	191024	191024_252_LC1125	LC1125	30	5	3.5	0.171	0.01	0.02623	0.0005	0.025182	0.0468	0.0028	159.4	8.9	166.9	3.1	50	130	<0.63	153000	77	<450	4.78	0.13	<9.3	366.2	451100	0.577		<0.06	<0.0053	26.3	0.052	1.04	1.61	0.748	8.03	2.36	27.5	10.75	56.1	13.37	139.5	33.58	10650	0.153
YM43	CORE	YM43 CORE	191024	191024_253_LC1126	LC1126	30	5	3.5	0.215	0.025	0.02717	0.00083	0.22242	0.0583	0.0073	197	21	172.8	5.2	450	280	<0.9	153000	49	<590	3.13	0.209	<13	264.1	438000	0.342		<0.13	0.0163	12.05	0.036	0.3	0.8	0.374	4.35	1.49	18.04	7.59	42.7	10.8	120.9	31.9	10670	0.104
YM43	RIM	YM43 RIM	191024	191024_255_LC1127	LC1127	30	5	3.5	0.213	0.02	0.02629	0.00076	0.07758	0.0589	0.0054	196	17	167.3	4.8	500	200	7.4	153000	67	<500	6.4	0.17	14.2	243.1	458000	0.443		0.76	0.123	16.79	0.047	0.6	1.06	0.428	4.96	1.421	17	7.04	37.6	8.95	94.9	23.21	10700	0.231
YM43	CORE	YM43 CORE	191024	191024_256_LC1128	LC1128	30	5	3.5
YM43	RIM	YM43 RIM	191024	191024_257_LC1129	LC1129	30	5	3.5	0.362	0.023	0.02649	0.00054	0.16527	0.0989	0.0067	311	17	168.6	3.4	1520	130	84	153000	56	<490	10.7	0.198	25	264.6	457100	0.388		1.63	0.055	12.27	0.04	0.52	0.81	0.406	3.96	1.33	16.8	7.19	40.9	10.16	117.8	31.69	10290	0.106
YM43	CORE	YM43 CORE	191024	191024_258_LC1130	LC1130	30	5	3.5	0.176	0.014	0.0261	0.00056	0.30968	0.0488	0.0038	163	12	166.1	3.5	100	160	11.1	153000	202	<480	10.3	0.499	<10	796	444000	0.951		0.25	0.0143	28.48	0.106	2.06	3.55	1.27	17.3	5.52	66.4	24.42	123.5	26.25	243.4	51.7	8810	0.322
YM43	RIM	YM43 RIM	191024	191024_260_LC1131	LC1131	30	5	3.5	0.2	0.014	0.02777	0.00055	0.11544	0.0525	0.0035	184	11	176.6	3.4	250	140	<0.66	153000	61	<450	3.34	<0.086	<9.1	302	438100	0.516		<0.061	<0.0048	17.1	0.038	0.55	1.21	0.465	5.74	1.73	21.8	8.73	47.6	11.38	121.4	30.6	10380	0.137
YM43	CORE	YM43 CORE	191024	191024_261_LC1132	LC1132	30	5	3.5	0.178	0.013	0.02655	0.0006	0.013603	0.0489	0.0037	165	11	168.9	3.7	100	150	<0.66	153000	63	<450	3.22	0.1	<9.5	517	453400	0.39		<0.02	0.0151	18.07	0.127	1.84	3.25	1.13	12.3	3.54	40.4	15.3	76.6	18.3	195	47.6	10920	0.109
YM43	RIM	YM43 RIM	191024	191024_262_LC1133	LC1133	30	5	3.5	0.1734	0.0099	0.02516	0.0004	0.048997	0.0502	0.003	161.8	8.5	160.2	2.5	160	120	<0.7	153000	66	<480	3.9	<0.091	<10	427	449300	0.717		<0.021	0.0095	24.7	0.0495	0.85	1.81	0.64	7.75	2.47	29.6	12.05	66.9	16.15	173.8	43	10640	0.183
YM43	CORE	YM43 CORE	191024	191024_263_LC1134	LC1134	30	5	3.5	0.179	0.015	0.0259	0.00067	0.30232	0.0493	0.0041	167	13	164.8	4.2	180	190	41	153000	77	<600	4.4	0.174	<13	870	443000	0.59		0.12	0.02	25.6	0.176	2.79	5.34	1.66	25.4	7.05	78.4	27.2	131.7	28.4	260	55.7	10680	0.206
YM43	RIM	YM43 RIM	191024	191024_265_LC1135	LC1135	30	5	3.5	0.176	0.012	0.02573	0.00052	0.073692	0.0502	0.0038	164	10	163.7	3.3	170	160	<0.58	153000	74	<460	4.2	0.133	<8.2	581	451300	0.998		0.024	0.0061	25.4	0.059	1.08	2.29	0.716	11.69	3.32	43.1	17.08	93.4	21.6	219.1	52.4	10460	0.247
YM43	CORE	YM43 CORE	191024	191024_266_LC1136	LC1136	30	5	3.5	0.199	0.019	0.02686	0.00057	0.29591	0.0536	0.0049	182	16	170.9	3.6	260	190	<0.75	153000	111	<470	5.48	0.18	<9.7	525	450600	0.604		<0.02	0.0081	17.37	0.071	1.48	2.49	0.883	13.25	3.93	45.4	16.17	81.7	17.53	171.2	36.7	10450	0.251
YM43	RIM	YM43 RIM	191024	191024_267_LC1137	LC1137	30	5	3.5	0.181	0.018	0.02562	0.00079	0.045597	0.0518	0.0055	168	15	163.1	5	210	220	<0.81	153000	68	<530	3.51	0.11	<10	270.1	448000	0.367		<0.1	<0.007	17	0.024	0.22	1.1	0.51	4.88	1.53	20	7.79	41.7	10.07	103.6	25.85	10350	0.114
YM43	CORE	YM43 CORE	191024	191024_268_LC1138	LC1138	30	5	3.5	0.181	0.015	0.02568	0.00053	0.04673	0.0514	0.0044	168	13	163.4	3.3	190	180	3.5	153000	76.3	<480	3.6	0.116	<9.3	439	456700	0.609		<0.08	0.0242	18.94	0.048	0.8	1.87	0.8	8.82	2.72	32.7	13.4	69.7	16.63	168.6	41.32	10450	0.156
YM43	RIM	YM43 RIM	191024	191024_275_LC1139	LC1139	30	5	3.5	0.175	0.013	0.02689	0.00063	0.1363	0.0479	0.0035	164	11	171	4	70	150	<0.71	153000	87	<520	3.78	0.176	<10	505	443600	0.68		<0.029	<0.008	22	0.056	1.18	2.38	0.9	10.23	3.11	37.8	15.1	82	18.65	192.8	45.3	10410	0.223
YM43	CORE	YM43 CORE	191024	191024_276_LC1140	LC1140	30	5	3.5	0.164	0.019	0.027	0.00076	0.01075	0.0443	0.0052	152	17	171.7	4.7	-80	230	4.3	153000	136	<470	5.88	0.8	<9.6	425	464800	0.59		<0.11	0.0194	15.1	0.068	0.94	2.01	0.61	10.5	3.04	34.8	13.1	66.4	14.7	139	31.2	11160	0.244
YM43	RIM	YM43 RIM	191024	191024_277_LC1141	LC1141	30	5	3.5	0.178	0.013	0.02543	0.00074	0.42215	0.0509	0.0034	166	11	161.9	4.7	210	140	1.36	153000	50	<610	3.8	0.113	<13	197.3	446000	0.343		<0.14	0.035	14.13	0.027	0.31	0.76	0.404	4.02	1.05	13.4	5.56	31	7.83	86.6	23	10720	0.14
YM43	RIM	YM43 RIM	191024	191024_278_LC1142	LC1142	30	5	3.5	0.1829	0.0095	0.02641	0.00043	0.055492	0.0503	0.0027	170	8.2	168.1	2.7	180	110	1	153000	120	<460	5.53	0.114	<9.2	842	461700	1.062		<0.12	0.0178	35.49	0.064	1.23	3.24	1.36	17.4	5.39	64	25.35	134.2	30.14	305.5	76.3	9290	0.135
YM43	CORE	YM43 CORE	191024	191024_280_LC1143	LC1143	30	5	3.5	0.195	0.02	0.02615	0.00071	0.052131	0.0542	0.0056	180	17	166.4	4.5	290	210	6.5	153000	97	<480	5.08	0.304	<10	460.2	461000	0.777		<0.094	0.0304	22.91	0.049	0.8	1.89	0.559	9.71	3	36.3	13.88	73.3	16.32	158.3	36.2	10790	0.27
YM43	RIM	YM43 RIM	191024	191024_281_LC1144	LC1144	30	5	3.5	0.177	0.01	0.02654	0.00056	0.29293	0.0488	0.0028	165.3	8.7	168.8	3.5	130	130	11	153000	186	<450	6.14	0.408	<9.6	771	455300	1.32		0.16	0.025	30.1	0.088	1.34	2.85	0.97	15.9	5.01	62.2	23.3	121	26.4	248	55.1	10050	0.358
YM43	RIM	YM43 RIM	191024	191024_282_LC1145	LC1145	30	5	3.5	0.28	0.075	0.0262	0.0014	0.28716	0.078	0.02	244	59	166.6	8.6	850	590	<1.3	153000	113	<940	6.5	0.19	<20	616	523000	0.58		<0.21	<0.011	17.4	0.174	1.87	3.9	1.26	17	5.34	53.3	19.7	96	20.2	189	40.2	11180	0.206
YM43	RIM	YM43 RIM	191024	191024_283_LC1146	LC1146	30	5	3.5	0.174	0.014	0.02604	0.00066	0.031523	0.0486	0.0041	165	13	165.7	4.1	120	180	1.7	153000	71	<520	2.65	<0.099	<11	329.7	458900	0.436		<0.12	0.0067	14.39	0.0318	0.42	0.88	0.426	5.49	1.78	22.31	9.65	52.4	12.97	140.6	35.74	10920	0.127
YM43	CORE	YM43 CORE	191024	191024_285_LC1147	LC1147	30	5	3.5	0.2	0.015	0.02766	0.00064	0.015621	0.0529	0.004	184	12	175.9	4	250	160	85	153000	131	<490	7.45	0.553	<9.9	927	448400	0.818		0.56	0.0295	26.1	0.223	3.89	6.82	1.75	27.7	7.65	84.9	30.3	144.1	30.2	276.6	58.1	10280	0.282
YM43	RIM	YM43 RIM	191024	191024_286_LC1148	LC1148	30	5	3.5	0.195	0.015	0.0275	0.0006	0.17137	0.0516	0.004	180	13	174.9	3.8	200	160	<0.73	153000	95	<500	5.22	0.126	<10	429.1	446800	0.747		<0.022	<0.0047	20.83	0.054	0.71	1.92	0.635	9.61	2.78	35.1	12.8	66.2	14.95	151.8	34.4	10590	0.227
YM43	CORE	YM43 CORE	191024	191024_287_LC1149	LC1149	30	5	3.5
YM43	RIM	YM43 RIM	191024	191024_288_LC1150	LC1150	30	5	3.5
YM43	CORE	YM43 CORE	191024	191024_290_LC1151	LC1151	30	5	3.5	0.189	0.016	0.02633	0.00054	0.070528	0.0522	0.0045	174	14	167.5	3.4	210	180	59	153000	87	<470	4.82	0.67	<11	438	448200	0.83		1.31	0.0073	24.7	0.044	0.99	1.93	0.613	10	3.1	35.5	13.7	69.1	15.3	148	33	10660	0.283
YM43	RIM	YM43 RIM	191024	191024_291_LC1152	LC1152	30	5	3.5	0.1744	0.0091	0.02673	0.00052	0.00065346	0.0476	0.0027	162.8	7.9	170	3.3	60	110	<0.68	153000	113	<500	5.35	0.229	<11	572	446000	1.069		<0.067	<0.0065	36.9	0.068	1.28	2.79	0.807	14.25	4.17	50.6	18.23	91.1	19.2	181.5	37.9	11220	0.362
YM43	CORE	YM43 CORE	191024	191024_292_LC1153	LC1153	30	5	3.5	0.194	0.024	0.0268	0.0011	0.063018	0.0528	0.0069	179	20	170.8	7.2	240	260	9.4	153000	152	<840	7.1	0.61	<19	621	477000	0.76		0.2	0.143	19.92	0.119	1.62	3.19	0.88	14.82	4.58	51.7	19.8	96.6	21.2	207	45.2	11070	0.311
YM43	RIM	YM43 RIM	191024	191024_293_LC1154	LC1154	30	5	3.5	0.173	0.012	0.02536	0.00049	0.21284	0.0505	0.0038	161	10	161.5	3.1	160	150	<0.71	153000	72	<470	3.42	<0.1	<10	341.6	440800	0.571		<0.14	<0.0044	20.21	0.0338	0.44	1.22	0.525	6.57	2.05	25	10.01	53.5	12.64	137.2	33.9	10420	0.184
YM43	CORE	YM43 CORE	191024	191024_295_LC1155	LC1155	30	5	3.5	0.1747	0.0099	0.02557	0.00047	0.16703	0.0497	0.0028	163	8.7	162.7	3	160	120	<0.84	153000	175	<540	7.41	0.48	<11	1020	457700	1.34		<0.073	0.0089	35.5	0.167	2.71	5.77	1.69	27.5	8.09	90.8	33.07	156.7	33.58	304.9	65.2	10210	0.399
YM43	RIM	YM43 RIM	191024	191024_296_LC1156	LC1156	30	5	3.5	0.179	0.013	0.02552	0.00065	0.17898	0.0507	0.0036	166	12	162.5	4.1	240	170	<0.84	153000	76	<570	3.41	<0.11	<12	310.2	457000	0.495		<0.088	<0.01	20.22	0.043	0.68	1.45	0.66	7.17	1.96	22.53	9.07	47.1	11.24	117.2	29.36	10710	0.142
YM43	CORE	YM43 CORE	191024	191024_297_LC1157	LC1157	30	5	3.5	0.182	0.012	0.02583	0.00056	0.11017	0.0513	0.0034	169	10	164.4	3.5	210	140	4.4	153000	160	<520	7.86	3.65	<10	1190	441000	2.88		0.86	0.0246	65	0.285	5.28	9.4	1.85	38.8	10.6	116	38.7	180	35.8	329	67	9670	0.587
YM43	RIM	YM43 RIM	191024	191024_298_LC1158	LC1158	30	5	3.5	0.185	0.013	0.02645	0.00054	0.097838	0.0511	0.0037	172	11	168.3	3.4	190	150	<0.73	153000	97	<480	4.93	0.177	<9.6	304.2	449900	0.536		<0.12	<0.0035	18.11	0.0281	0.51	1.38	0.468	6.33	2.07	24.42	9.17	46.4	10.56	108.4	24.74	10790	0.178
YM43	CORE	YM43 CORE	191024	191024_305_LC1159	LC1159	30	5	3.5	0.185	0.016	0.02578	0.00059	0.090547	0.0525	0.0047	171	13	164.1	3.7	220	180	1.75	153000	83	<520	5.89	0.122	<11	644	453000	0.459		0.3	0.056	19.7	0.115	2.04	4.23	1.16	18.3	5.19	56.1	20.54	98.8	21.47	209.1	45	10730	0.22
YM43	RIM	YM43 RIM	191024	191024_306_LC1160	LC1160	30	5	3.5	0.196	0.027	0.0262	0.0011	0.044724	0.0526	0.0067	179	23	166.6	6.8	260	270	<0.88	153000	116	<550	6.1	0.162	<12	460	466000	0.843		<0.14	<0.0066	22.94	0.0314	0.8	2.09	0.672	9.95	3.15	39.5	14.19	72.9	16.17	157.5	33.8	10760	0.307
YM43	CORE	YM43 CORE	191024	191024_307_LC1161	LC1161	30	5	3.5
YM43	RIM	YM43 RIM	191024	191024_308_LC1162	LC1162	30	5	3.5	0.169	0.015	0.02531	0.0005	0.20708	0.0481	0.0042	157	13	161.1	3.2	90	190	<0.77	153000	122	<530	6.13	0.29	<12	404.6	461400	0.808		<0.073	<0.0064	21.35	0.035	0.77	1.64	0.603	8.99	2.751	33.74	12.47	63.3	13.68	129.8	28.55	10890	0.256
YM43	RIM	YM43 RIM	191024	191024_310_LC1163	LC1163	30	5	3.5	0.184	0.016	0.02615	0.00059	0.15463	0.0511	0.0045	170	14	166.4	3.7	170	180	1.81	153000	93	<500	2.77	0.137	<10	312.9	455000	0.306		0.159	0.053	12.46	0.061	0.55	1.21	0.551	6.54	1.885	22.29	9.01	50	11.79	126.8	31.63	10630	0.119
YM43	RIM	YM43 RIM	191024	191024_311_LC1164	LC1164	30	5	3.5	0.164	0.027	0.0258	0.0012	0.32143	0.0464	0.0071	153	23	164.4	7.6	-10	300	537	153000	200	<870	16.1	0.42	42	528	455000	0.79		7.5	0.23	19.8	0.121	1.13	2.19	0.65	11.7	3.49	45.9	16.2	83	17.8	175.6	37.4	9980	0.266
YM43	RIM	YM43 RIM	191024	191024_312_LC1165	LC1165	30	5	3.5	0.197	0.018	0.02605	0.00046	0.037135	0.0552	0.0052	181	15	165.7	2.9	310	190	4.31	153000	139	<570	6.36	0.252	21.3	605	468000	0.833		0.78	0.096	24.19	0.092	1.59	3.2	0.887	14.21	4.39	50.7	19.26	93.9	20.62	200.1	42.6	10760	0.375
YM43	CORE	YM43 CORE	191024	191024_313_LC1166	LC1166	30	5	3.5	0.168	0.02	0.02553	0.00061	0.015688	0.0479	0.0059	155	17	162.5	3.8	10	230	67	153000	134	2500	20.9	2.74	1060	701	450000	0.443		0.162	0.217	17.35	0.213	3	5.34	1.44	21.7	5.95	65	22.9	106.4	22.5	205	42.5	9790	0.209
YM43	RIM	YM43 RIM	191024	191024_315_LC1167	LC1167	30	5	3.5	0.187	0.019	0.02609	0.0007	0.019252	0.0525	0.0056	172	16	166	4.4	190	210	1.23	153000	110	<530	5.64	0.135	<11	359.3	453000	0.668		0.025	<0.0039	15.2	0.0393	0.5	1.61	0.373	8	2.29	28.13	10.75	58.4	12.92	126.2	28.48	10550	0.233
YM43	CORE	YM43 CORE	191024	191024_316_LC1168	LC1168	30	5	3.5
YM43	RIM	YM43 RIM	191024	191024_317_LC1169	LC1169	30	5	3.5	0.273	0.051	0.02627	0.00067	0.62892	0.0695	0.0076	239	35	167.1	4.2	850	260	8.3	153000	75	<560	3.33	0.22	18.6	229.8	465000	0.395		0.56	0.41	14.66	0.105	0.9	1.13	0.44	4.81	1.27	16	6.6	35.5	8.59	93.3	23.05	10770	0.111
YM43	RIM	YM43 RIM	191024	191024_318_LC1170	LC1170	30	5	3.5	0.181	0.012	0.0264	0.00044	0.035951	0.0498	0.0034	168	10	168	2.8	150	140	7.3	153000	93	<460	4.76	0.228	9.9	527.7	447400	0.78		0.27	0.091	21.38	0.074	1.24	2.36	0.854	10.98	3.4	41.8	15.79	83.5	18.82	188.8	43.7	10810	0.323
YM43	RIM	YM43 RIM	191024	191024_320_LC1171	LC1171	30	5	3.5	0.247	0.045	0.0263	0.001	0.17655	0.068	0.013	218	35	167.6	6.5	560	330	320	153000	103	<770	5.9	0.69	98	278	458800	0.573		6.3	0.102	12.51	0.033	0.51	0.94	0.296	5.57	1.79	20.1	8.12	44.1	9.54	97.4	22	10830	0.206
YM43	CORE	YM43 CORE	191024	191024_321_LC1172	LC1172	30	5	3.5	0.175	0.015	0.02633	0.00069	0.03332	0.0486	0.0042	163	12	167.5	4.3	80	170	1.32	153000	115	<490	4.64	2.12	<10	554	453500	0.714		2.18	0.0264	21.1	0.071	1.37	3.06	0.868	13.71	4.11	48.2	17.74	87.3	18.56	181.2	38.65	11230	0.23
YM43	RIM	YM43 RIM	191024	191024_322_LC1173	LC1173	30	5	3.5	0.178	0.024	0.0253	0.002	0.24946	0.0518	0.007	166	21	161	12	240	280	<1.2	153000	90	<820	4.5	<0.17	<19	412	439000	0.73		<0.24	<0.013	20.5	0.046	0.66	1.51	0.38	8.2	2.7	32.7	13.3	64.8	15.25	152	36.2	10990	0.22
YM43	CORE	YM43 CORE	191024	191024_323_LC1174	LC1174	30	5	3.5	0.179	0.018	0.02572	0.00063	0.097137	0.0507	0.0049	166	15	163.7	4	190	210	<0.74	153000	95	<540	5.15	0.208	<12	510	461000	0.736		<0.024	<0.0081	19.8	0.048	0.91	2.26	0.69	11.54	3.53	40.8	15.64	80.7	17.5	170.6	37.7	10620	0.273
YM43	RIM	YM43 RIM	191024	191024_325_LC1175	LC1175	30	5	3.5	0.164	0.014	0.02583	0.00045	0.18576	0.0464	0.0043	153	13	164.4	2.8	-20	180	<0.84	153000	71	<540	2.77	<0.1	<12	360.8	463500	0.654		<0.075	<0.0066	21.41	0.029	0.74	1.63	0.579	8.08	2.38	29.3	11.13	57	12.67	127.8	29.51	11200	0.249
YM43	CORE	YM43 CORE	191024	191024_326_LC1176	LC1176	30	5	3.5
YM43	RIM	YM43 RIM	191024	191024_327_LC1177	LC1177	30	5	3.5	0.187	0.016	0.02394	0.00063	0.1877	0.0578	0.0053	175	15	152.5	3.9	400	190	17.6	153000	88	<450	4.88	0.71	19	311.7	446600	0.525		0.7	0.054	16.27	0.093	0.8	1.63	0.596	6.38	1.94	23.4	8.98	48.1	10.6	106.3	25.45	10360	0.155
YM42	CORE	YM42 CORE	191024	191024_328_LC1178	LC1178	30	5	3.5	0.1719	0.0085	0.02633	0.00047	0.20115	0.0479	0.0025	162.2	7.8	167.5	3	80	110	99	153000	173	<480	7.7	0.447	<11	885	448300	2.29		0.066	0.0124	52.9	0.109	2.17	4.68	1.17	23.5	6.81	79.3	28.4	134	28.3	262.2	54.9	10380	0.617
YM42	RIM	YM42 RIM	191024	191024_335_LC1179	LC1179	30	5	3.5	0.166	0.013	0.02641	0.00052	0.047784	0.0457	0.0036	155	11	168	3.3	-30	150	<0.87	153000	107	<560	5.18	0.176	<12	380	446300	0.587		<0.12	<0.0013	20.6	0.048	0.97	1.73	0.556	8	2.58	31.2	11.74	59	13.54	136.5	29.82	10360	0.243
YM42	CORE	YM42 CORE	191024	191024_336_LC1180	LC1180	30	5	3.5	0.185	0.017	0.02649	0.00065	0.3147	0.0507	0.0046	171	15	168.5	4.1	160	180	<0.9	153000	146	<610	7.19	0.46	<13	923	439800	0.554		<0.084	0.0087	18.31	0.164	3.41	6.25	1.68	26.2	7.12	82.7	29.61	142.9	29.78	272.1	57.3	9700	0.236
YM42	RIM	YM42 RIM	191024	191024_337_LC1181	LC1181	30	5	3.5
YM42	CORE	YM42 CORE	191024	191024_338_LC1182	LC1182	30	5	3.5	0.189	0.015	0.02667	0.00055	0.10945	0.0515	0.0041	175	13	169.7	3.5	230	170	10.7	153000	104	<530	8.4	0.92	<11	677	445000	0.62		0.29	0.076	22.3	0.161	2.16	4.26	1.28	18.6	5.35	57.5	20.8	102	23.1	216	49.6	10820	0.285
YM42	RIM	YM42 RIM	191024	191024_340_LC1183	LC1183	30	5	3.5	0.18	0.013	0.0278	0.0006	0.073068	0.0474	0.0038	167	12	176.8	3.8	30	150	4.26	153000	71	<530	4.83	0.143	<12	385	443200	0.66		0.38	0.086	22.8	0.0428	0.57	1.42	0.611	7.01	2.24	28	10.9	61.8	14.18	153.7	37.8	10340	0.228
YM42	CORE	YM42 CORE	191024	191024_341_LC1184	LC1184	30	5	3.5	0.199	0.013	0.02778	0.0006	0.26426	0.0519	0.0033	183	11	176.6	3.8	230	130	34	153000	142	<480	5.24	0.337	13.4	702	436400	1.065		0.161	0.035	29.42	0.096	1.55	3.29	1.11	17.4	5.17	60.1	22.54	109	23.74	228.3	49.5	10230	0.287
YM42	RIM	YM42 RIM	191024	191024_342_LC1185	LC1185	30	5	3.5	0.185	0.015	0.02807	0.00061	0.095455	0.048	0.0038	171	13	178.4	3.9	60	160	1.05	153000	51	<470	3.09	<0.092	<8.6	244.8	448500	0.397		<0.021	<0.0066	16.45	0.0282	0.49	1.08	0.446	5.04	1.473	17.86	7.21	39	8.84	93.7	22.65	10300	0.108
YM42	CORE	YM42 CORE	191024	191024_343_LC1186	LC1186	30	5	3.5	0.2641	0.0096	0.03719	0.00055	0.086656	0.0516	0.002	237.5	7.7	235.4	3.4	245	83	2.92	153000	355	<450	4.41	0.3	<10	1341	442200	1.905		<0.11	0.0118	13.24	0.075	1.4	3.07	0.83	20.2	7.07	98.7	41.4	225	51.7	514	118.4	9700	0.646
YM42	RIM	YM42 RIM	191024	191024_345_LC1187	LC1187	30	5	3.5	0.199	0.025	0.02822	0.0009	0.1025	0.0519	0.0069	182	21	179.4	5.6	220	270	<0.78	153000	130	<510	6.9	0.185	<12	333	436800	0.494		<0.13	<0.0075	14.85	0.0231	0.55	1.46	0.444	7.09	2.18	27	10.24	52	11.54	112	24.6	9870	0.176
YM42	CORE	YM42 CORE	191024	191024_346_LC1188	LC1188	30	5	3.5
YM42	RIM	YM42 RIM	191024	191024_347_LC1189	LC1189	30	5	3.5
YM42	CORE	YM42 CORE	191024	191024_348_LC1190	LC1190	30	5	3.5	0.18	0.013	0.02593	0.00059	0.021649	0.0506	0.0039	167	12	165	3.7	170	160	5.3	153000	296	<600	15.6	0.97	<12	942	470000	1.252		<0.11	0.0114	22.47	0.128	2.28	3.97	1.29	19.8	6.18	77.9	29.6	147	31.4	300	64.3	9040	0.393
YM42	RIM	YM42 RIM	191024	191024_350_LC1191	LC1191	30	5	3.5	0.168	0.014	0.02547	0.00053	0.36391	0.0477	0.0037	157	12	162.1	3.4	50	150	<0.87	153000	55	<600	4.12	<0.12	<12	393.9	461000	0.632		<0.085	<0.0067	17.69	0.0305	0.5	1.3	0.589	6.69	2.14	27.21	11.48	65.3	15.64	170.4	42.6	10930	0.214
YM42	CORE	YM42 CORE	191024	191024_351_LC1192	LC1192	30	5	3.5	0.176	0.012	0.02597	0.00058	0.036421	0.0494	0.0036	164	10	165.3	3.6	120	150	<0.95	153000	99	<600	5.46	0.271	<13	540	447100	0.905		<0.13	<0.0067	26.25	0.067	1.16	2.19	0.836	11.74	3.6	43.8	16.99	86.2	18.99	186.1	41.9	10720	0.281
YM42	RIM	YM42 RIM	191024	191024_352_LC1193	LC1193	30	5	3.5	0.199	0.014	0.02715	0.00064	0.19677	0.0533	0.0036	183	11	172.7	4	280	140	<0.88	153000	100	<590	4.99	0.136	<12	376	446100	0.707		<0.14	<0.0074	20.4	0.046	0.62	1.75	0.516	8.84	2.51	31.2	11.75	58	13.14	132.5	29.7	10990	0.287
YM42	CORE	YM42 CORE	191024	191024_353_LC1194	LC1194	30	5	3.5
YM42	RIM	YM42 RIM	191024	191024_355_LC1195	LC1195	30	5	3.5	0.186	0.014	0.02748	0.00046	0.087951	0.0495	0.0041	172	12	174.8	2.9	110	160	1.5	153000	65	<470	2.94	0.103	<9.3	311.7	434700	0.508		<0.14	0.0061	16.93	0.0277	0.61	1.06	0.51	5.79	1.66	21.67	8.98	49.3	12.12	129.3	33	10390	0.139
YM42	CORE	YM42 CORE	191024	191024_356_LC1196	LC1196	30	5	3.5	0.477	0.037	0.02852	0.00077	0.17735	0.12	0.01	392	24	181.2	4.9	1910	150	21	153000	99	<490	4.69	1.04	28	522	440600	0.433		0.71	0.04	17.1	0.097	1.65	3.41	0.98	14	3.91	44.6	16.3	81.2	17.4	167	36.9	10570	0.17
YM42	RIM	YM42 RIM	191024	191024_357_LC1197	LC1197	30	5	3.5
YM42	CORE	YM42 CORE	191024	191024_358_LC1198	LC1198	30	5	3.5	0.199	0.015	0.02598	0.00062	0.1731	0.0558	0.0041	184	12	165.3	3.9	360	160	297	153000	144	<500	8.3	1.94	133	784	436800	1.076		2.06	0.152	33.8	0.193	2.79	5.47	1.23	22.2	6.26	72.4	25.7	122.7	25.3	235	50.1	10410	0.333
YM42	RIM	YM42 RIM	191024	191024_365_LC1199	LC1199	30	5	3.5	0.18	0.012	0.0274	0.00057	0.19223	0.0478	0.0032	168	10	174.2	3.6	70	140	7	153000	71	<510	4.24	0.152	<10	438	447300	0.653		<0.094	0.016	29.14	0.056	1.2	2	0.654	10.15	2.96	34.2	13.08	68.4	15.49	149.3	34.45	10440	0.189
YM42	CORE	YM42 CORE	191024	191024_366_LC1200	LC1200	30	5	3.5
YM42	RIM	YM42 RIM	191024	191024_367_LC1201	LC1201	30	5	3.5	0.202	0.023	0.02695	0.00066	0.048895	0.0545	0.0064	185	19	171.4	4.1	290	230	5.6	153000	80	<500	4.84	0.237	<11	347.3	450900	0.64		<0.11	<0.0076	23.35	0.042	0.68	1.5	0.602	7.69	2.47	27.3	10.63	54.9	12.17	127.3	29.4	11060	0.186
YM42	CORE	YM42 CORE	191024	191024_368_LC1202	LC1202	30	5	3.5	0.199	0.021	0.0262	0.0011	0.22071	0.0555	0.0059	183	18	166.8	6.9	350	220	11.4	153000	173	<570	6.4	0.403	14.2	500.9	446500	0.529		<0.14	0.077	16.81	0.053	1.1	2.46	0.8	13.06	3.8	43.8	16.52	78.8	16.94	160.3	35.2	10800	0.155
YM42	RIM	YM42 RIM	191024	191024_370_LC1203	LC1203	30	5	3.5	0.175	0.011	0.02648	0.00053	0.041572	0.0482	0.0032	162.8	9.7	168.5	3.4	80	140	<0.68	153000	60	<440	3.64	0.174	<8.9	468	441800	0.423		0.092	0.034	16.56	0.084	1.22	2.48	0.875	11.17	3.16	36.9	13.63	72.2	16.56	168	41	10580	0.173
YM42	CORE	YM42 CORE	191024	191024_371_LC1204	LC1204	30	5	3.5	0.191	0.018	0.02521	0.00087	0.30327	0.056	0.006	177	15	160.5	5.5	370	230	7.6	153000	141	<710	6.3	0.26	34	1093	443000	0.888		1.15	0.133	29.2	0.223	4.07	7.23	1.89	31	9.05	97.6	35.1	169.4	35	322	67.9	10780	0.438
YM42	RIM	YM42 RIM	191024	191024_372_LC1205	LC1205	30	5	3.5	0.187	0.014	0.02563	0.00065	0.021033	0.0524	0.0041	173	12	163.1	4.1	260	160	1.94	153000	72	<570	5.1	0.127	<12	420	456000	0.699		<0.083	0.057	25.28	0.044	0.92	1.69	0.614	8.78	2.58	31.1	12.43	64.3	15.24	156.7	37.3	10670	0.235
YM42	CORE	YM42 CORE	191024	191024_373_LC1206	LC1206	30	5	3.5	0.178	0.013	0.02665	0.0007	0.035357	0.0485	0.0041	165	11	169.5	4.4	120	160	<0.83	153000	157	<540	10.5	0.39	<11	694	472000	1.007		<0.13	0.0095	21.37	0.065	1.39	3.06	0.97	14.32	4.59	54.9	21.49	110.6	24.77	236.4	51.2	9320	0.304
YM42	RIM	YM42 RIM	191024	191024_375_LC1207	LC1207	30	5	3.5
YM42	CORE	YM42 CORE	191024	191024_376_LC1208	LC1208	30	5	3.5	0.176	0.019	0.02698	0.00084	0.32788	0.0476	0.0049	164	16	171.6	5.3	60	210	108	153000	190	<880	7.6	0.84	52	1113	445000	3.2		0.98	0.099	23.5	0.082	1.26	2.73	1.44	16.4	5.9	78.5	32.4	181	42.8	450	105.4	8750	0.7
YM42	RIM	YM42 RIM	191024	191024_377_LC1209	LC1209	30	5	3.5
YM42	CORE	YM42 CORE	191024	191024_378_LC1210	LC1210	30	5	3.5
YM42	RIM	YM42 RIM	191024	191024_380_LC1211	LC1211	30	5	3.5	0.184	0.015	0.02612	0.00056	0.064465	0.0514	0.0042	171	13	166.2	3.5	190	170	1.1	153000	97	<490	4.54	0.186	<10	339.6	461000	0.549		<0.093	<0.01	19.37	0.0255	0.69	1.61	0.498	7.05	2.32	26.81	10.49	52.7	11.87	116	27.03	11050	0.228
YM42	CORE	YM42 CORE	191024	191024_381_LC1212	LC1212	30	5	3.5	0.178	0.012	0.0257	0.00053	0.23232	0.0503	0.0035	166	11	163.6	3.3	160	140	1.43	153000	259	<400	11.81	0.79	<8.9	1435	465700	1.072		<0.019	0.081	23.4	0.346	4.76	8.5	2.62	43.8	12.3	138.3	47.5	217	43.1	388	78.9	9940	0.328
YM42	RIM	YM42 RIM	191024	191024_382_LC1213	LC1213	30	5	3.5	0.166	0.013	0.02532	0.00068	0.10263	0.0478	0.0039	159	13	161.2	4.2	110	180	<0.8	153000	104	<490	4.71	0.125	<12	490	447000	1.01		<0.12	0.239	27.66	0.102	0.89	1.79	0.71	8.9	2.75	34.6	14.44	77.6	18.85	198.3	48.5	10630	0.256
YM42	CORE	YM42 CORE	191024	191024_383_LC1214	LC1214	30	5	3.5	0.161	0.015	0.02636	0.00062	0.026459	0.0438	0.004	150	13	167.7	3.9	-90	170	9.4	153000	224	<550	11.2	0.627	<11	636	453600	0.719		<0.13	0.062	19.64	0.11	1.82	3.66	1.01	16.64	4.85	54	20.11	97.6	21.06	202.2	43.11	9620	0.263
YM42	RIM	YM42 RIM	191024	191024_385_LC1215	LC1215	30	5	3.5	0.163	0.018	0.02635	0.00078	0.062989	0.0467	0.0055	152	16	167.6	4.9	-20	220	2.83	153000	131	<460	9.3	0.322	<11	295.7	458300	0.575		<0.068	0.028	13.75	0.0197	0.57	1.09	0.371	5.99	1.99	23.5	9.09	47.4	10.54	102.1	22.87	10850	0.263
YM42	CORE	YM42 CORE	191024	191024_386_LC1216	LC1216	30	5	3.5	0.173	0.023	0.02539	0.00078	0.21454	0.0507	0.007	160	19	161.6	4.9	80	260	<0.81	153000	110	<510	7.5	0.52	<11	676	456000	0.402		<0.12	0.0081	17.47	0.137	2.7	5.14	1.48	21.1	5.86	62.9	21.8	101.5	21.3	194	39.7	9730	0.142
YM42	RIM	YM42 RIM	191024	191024_387_LC1217	LC1217	30	5	3.5	0.168	0.021	0.02535	0.00067	0.088481	0.0471	0.0059	155	18	161.4	4.2	10	240	<0.81	153000	96	<520	5.78	0.242	<10	354.3	462900	0.654		<0.077	<0.006	15.72	0.0282	0.57	1.41	0.447	7.92	2.44	28.9	11.05	58.1	13.04	126.9	27.85	10910	0.186
YM42	CORE	YM42 CORE	191024	191024_388_LC1218	LC1218	30	5	3.5	0.19	0.016	0.02677	0.00065	0.018568	0.0527	0.0047	178	14	170.3	4.1	230	180	<0.76	153000	102	<480	3.73	0.148	<11	369	459000	0.662		<0.089	<0.0036	14.31	0.0185	0.46	1.2	0.389	6.64	2.16	29.1	11.21	61	13.82	140.3	31.6	12670	0.289
YM42	RIM	YM42 RIM	191024	191024_395_LC1219	LC1219	30	5	3.5	0.212	0.02	0.0262	0.0011	0.055445	0.0588	0.0057	194	16	166.9	7.2	500	220	<0.99	153000	150	<660	4.73	0.24	<16	500	456000	0.89		<0.25	0.11	28.26	0.081	1.14	2.01	0.77	10.5	3.24	39.5	15.12	79.6	17.96	177	39.8	11070	0.33
YM42	CORE	YM42 CORE	191024	191024_396_LC1220	LC1220	30	5	3.5	0.167	0.02	0.02542	0.00068	0.10296	0.0482	0.006	155	17	161.8	4.3	0	230	<0.81	153000	191	<560	13.7	0.83	<11	838	468000	0.579		<0.027	0.0183	16.53	0.26	4.05	6.71	1.72	25.4	7.12	77.3	27.15	125.9	26.4	241.6	51.2	9480	0.222
YM42	RIM	YM42 RIM	191024	191024_397_LC1221	LC1221	30	5	3.5	0.179	0.024	0.02585	0.00085	0.15325	0.0516	0.0071	165	20	164.5	5.4	110	270	4.21	153000	101	<550	7.18	0.201	<11	190	469300	0.418		<0.081	<0.0054	11.14	0.0168	0.41	0.75	0.195	3.63	1.167	15.41	5.89	30.5	6.85	70.2	15.69	11650	0.191
YM42	RIM	YM42 RIM	191024	191024_398_LC1222	LC1222	30	5	3.5	0.232	0.022	0.02535	0.00085	0.24002	0.0669	0.0072	211	18	161.4	5.4	740	230	5.5	153000	69	<570	3.45	0.149	<12	442.7	478000	0.336		1.12	0.0156	14.52	0.088	1.07	2.37	1.03	10.66	3.07	34	12.91	68.5	15.17	156.9	37.9	10960	0.11
YM42	CORE	YM42 CORE	191024	191024_400_LC1223	LC1223	30	5	3.5	0.183	0.025	0.02636	0.00096	0.19406	0.0521	0.0076	167	21	167.7	6	100	260	2.32	153000	127	<560	6.23	0.407	<11	332	460000	0.532		<0.12	<0.0055	14.09	0.038	0.79	1.42	0.32	7.49	2.49	28.1	10.35	51.4	11.23	110.6	23.9	10000	0.198
YM42	RIM	YM42 RIM	191024	191024_401_LC1224	LC1224	30	5	3.5	0.175	0.012	0.02512	0.00072	0.37137	0.0503	0.0032	163	10	159.9	4.6	180	130	40	153000	325	<640	10.1	4.33	16	2410	467000	2.76		<0.19	0.41	90.9	0.75	11.9	21.5	4.22	89	23.5	245	82.4	356	71.7	614	122	9650	0.63
YM42	CORE	YM42 CORE	191024	191024_402_LC1225	LC1225	30	5	3.5	0.1866	0.0054	0.02443	0.00034	0.087477	0.0559	0.0018	173.5	4.6	155.6	2.1	425	72	770	153000	448	<440	15.3	13.64	433	4708	448200	7.38		11.6	0.87	242	1.41	20.4	35.9	6.17	152.3	42.2	457.2	153.5	707	138.1	1221	234.7	9920	1.375
YM42	RIM	YM42 RIM	191024	191024_403_LC1226	LC1226	30	5	3.5	0.172	0.016	0.02529	0.00063	0.2849	0.0493	0.0044	160	14	161	3.9	110	180	3	153000	246	<460	5.73	0.244	<9.5	426.3	449000	0.71		<0.1	0.67	21.6	0.26	1.46	1.86	0.531	9.46	2.88	35.6	13.27	65.6	14.5	142.1	31.18	11040	0.257
YM42	CORE	YM42 CORE	191024	191024_405_LC1227	LC1227	30	5	3.5	0.195	0.014	0.02763	0.00056	0.24037	0.0513	0.0037	180	12	175.7	3.5	190	150	640	153000	130	<490	10.3	1.66	350	801	456000	0.932		2.89	0.106	29.4	0.178	3.46	5.25	1.51	23.6	6.61	72.3	25.2	122.9	25.98	244.1	53.1	10660	0.318
YM42	RIM	YM42 RIM	191024	191024_406_LC1228	LC1228	30	5	3.5	0.223	0.016	0.02553	0.00071	0.053577	0.0638	0.0049	204	13	162.5	4.5	700	170	103	153000	78	<890	7.5	0.45	47	454.1	457000	1		2.88	0.077	34.9	0.163	1.75	2.7	0.92	11.3	3.05	34.9	13.43	70.8	16.37	173	43.2	11040	0.33
YM42	CORE	YM42 CORE	191024	191024_407_LC1229	LC1229	30	5	3.5	0.19	0.015	0.02557	0.00059	0.10901	0.0545	0.0046	176	13	162.8	3.7	300	170	1.22	153000	172	<520	8.4	0.356	<11	800	475000	0.698		<0.12	0.0109	19.88	0.174	2.76	5.15	1.27	22.3	6.53	71.4	25.8	123.3	26.4	252	52.4	10290	0.255
YM42	RIM	YM42 RIM	191024	191024_408_LC1230	LC1230	30	5	3.5	0.167	0.014	0.02515	0.00051	0.38044	0.048	0.0036	156	12	160.1	3.2	70	150	1.88	153000	104	<510	5.73	0.283	<11	543	464000	1.04		<0.097	0.048	33.3	0.0527	1.23	2.54	0.746	13.46	3.95	46.4	17	83.1	18.43	174	38	11190	0.354
YM42	CORE	YM42 CORE	191024	191024_410_LC1231	LC1231	30	5	3.5	0.1737	0.0094	0.02447	0.00058	0.030388	0.0519	0.0031	162.4	8.1	155.8	3.7	250	130	0.9	153000	207	<540	6.7	0.46	<11	1112	451000	2.08		<0.13	0.051	54.9	0.13	2.16	5.27	1.45	28.4	8.09	99	35.3	169.2	34.4	326	66.9	10450	0.606
YM42	RIM	YM42 RIM	191024	191024_411_LC1232	LC1232	30	5	3.5	0.175	0.019	0.0255	0.00077	0.016758	0.0505	0.0058	162	17	162.3	4.9	110	230	<0.76	153000	114	<480	5.77	0.234	<9.7	374.5	476000	0.638		<0.07	<0.0037	17.11	0.0306	0.67	1.64	0.453	8.27	2.67	30.1	11.71	58.6	13.11	129.6	27.77	10650	0.218
YM42	CORE	YM42 CORE	191024	191024_412_LC1233	LC1233	30	5	3.5	0.164	0.021	0.0241	0.001	0.21483	0.0503	0.0071	154	18	153.5	6.3	170	300	155	153000	646	<720	7.7	4.2	27	2410	433000	2.36		1.4	0.221	65	0.66	9.6	19.6	5.5	85	22.5	234	77	337	67	580	113	8870	0.46
YM42	RIM	YM42 RIM	191024	191024_413_LC1234	LC1234	30	5	3.5	0.18	0.016	0.02604	0.00056	0.099319	0.0502	0.0044	169	14	165.7	3.5	170	180	1.63	153000	114	<390	7.47	0.262	<8	301.6	469100	0.55		<0.059	<0.0052	14.08	0.0252	0.57	1.4	0.381	6.7	2.078	24.87	9.36	48.2	10.51	103	22.95	11230	0.209
YM42	CORE	YM42 CORE	191024	191024_415_LC1235	LC1235	30	5	3.5	0.218	0.028	0.02687	0.0008	0.32945	0.0587	0.0075	196	24	170.9	5	360	270	4.12	153000	149.8	<400	10.4	0.361	<7.1	320	458700	0.467		<0.11	0.0107	9.32	0.0201	0.48	1.15	0.32	6.41	2.05	25.6	9.72	50.5	11.18	110	24.06	10900	0.22
YM42	RIM	YM42 RIM	191024	191024_416_LC1236	LC1236	30	5	3.5	0.184	0.017	0.02543	0.00063	0.084317	0.0517	0.0048	170	14	161.9	3.9	210	200	2.84	153000	130	<400	7.72	0.408	<8	328.1	474800	0.675		<0.13	0.0125	15.14	0.0252	0.57	1.12	0.383	6.68	2.21	25.65	10.03	51.2	11.6	113.8	25.15	11370	0.22
YM42	CORE	YM42 CORE	191024	191024_417_LC1237	LC1237	30	5	3.5	0.177	0.017	0.02521	0.00059	0.067168	0.0514	0.005	164	14	160.5	3.7	160	190	118	153000	112	<380	12.6	0.335	57	790	467000	0.64		0.81	0.0179	16.61	0.217	3.7	5.52	1.79	23.22	6.49	71.9	25.55	120.8	25.05	225.1	47.3	10330	0.193
YM42	RIM	YM42 RIM	191024	191024_418_LC1238	LC1238	30	5	3.5
YM42	CORE	YM42 CORE	191024	191024_425_LC1239	LC1239	30	5	3.5	0.181	0.014	0.02576	0.00052	0.0349	0.0504	0.0037	168	12	163.9	3.3	190	160	<0.59	153000	109	<390	4.6	0.173	<7.6	518	477000	0.98		<0.075	<0.006	23.36	0.047	0.79	2.12	0.675	11.12	3.37	41.7	16.19	81.2	18.65	180.5	39.8	11570	0.328
YM42	RIM	YM42 RIM	191024	191024_426_LC1240	LC1240	30	5	3.5	0.171	0.011	0.02558	0.00043	0.28797	0.0485	0.003	159.6	9.4	162.8	2.7	100	130	<0.57	153000	118.2	<380	4.59	0.237	<8.6	652	467000	1.014		<0.018	<0.0054	30.17	0.078	1.37	3.21	1.015	14.97	4.52	54.7	20.25	103.2	22.61	221.4	48.4	10720	0.314
YM42	RIM	YM42 RIM	191024	191024_427_LC1241	LC1241	30	5	3.5	0.18	0.012	0.02667	0.00058	0.10435	0.0492	0.0033	167	10	169.7	3.7	130	140	1.32	153000	63	<400	3.51	<0.077	62	244.1	446000	0.448		<0.062	0.032	16.86	0.0339	0.53	1.05	0.491	4.57	1.423	17.46	7.02	38.3	9.25	99.4	24.76	10380	0.14
YM42	CORE	YM42 CORE	191024	191024_428_LC1242	LC1242	30	5	3.5	0.198	0.022	0.02522	0.00054	0.1458	0.057	0.0067	182	19	160.5	3.4	370	250	9.1	153000	150	<440	8.3	0.33	18.1	599	465000	0.734		0.64	0.07	17.7	0.086	1.48	2.85	1.03	14.17	4.17	51.4	18.75	91.8	20.48	194.6	41.9	10690	0.357
YM42	RIM	YM42 RIM	191024	191024_430_LC1243	LC1243	30	5	3.5	0.201	0.017	0.02597	0.00057	0.099141	0.0565	0.0049	185	15	165.3	3.6	370	180	5.83	153000	98	<460	6.8	0.19	12.8	355	465200	0.509		0.26	0.05	18.96	0.041	0.75	1.48	0.541	7.87	2.47	29.5	10.94	55.1	12.49	123.7	27.3	11070	0.239
YM42	CORE	YM42 CORE	191024	191024_431_LC1244	LC1244	30	5	3.5	0.166	0.012	0.02473	0.00057	0.16565	0.0494	0.004	155	11	157.4	3.6	120	170	182	153000	155	<490	7.19	1.43	<10	911	463300	1.24		0.42	0.084	36.4	0.121	1.7	4.66	1.13	22.3	6.99	78.6	28.61	138.3	28.6	268	56.9	10820	0.431
YM42	RIM	YM42 RIM	191024	191024_432_LC1245	LC1245	30	5	3.5	0.167	0.018	0.02617	0.00056	0.095148	0.0468	0.005	155	15	166.5	3.5	20	220	<0.75	153000	105	<460	6.46	0.165	<9.4	342	465300	0.475		<0.023	<0.0077	14.16	0.0331	0.72	1.5	0.519	7.44	2.32	28.13	10.49	53.9	11.93	122.5	26.89	10550	0.2
YM42	CORE	YM42 CORE	191024	191024_433_LC1246	LC1246	30	5	3.5	0.181	0.019	0.02616	0.00098	0.22019	0.0506	0.0054	168	16	166.4	6.2	180	220	16	153000	160	<810	5.1	0.82	<18	1220	449000	1.75		<0.086	0.025	51.6	0.207	3.5	7.2	1.74	34	9.9	111	39.6	183	37.9	359	74.5	10660	0.444
YM42	RIM	YM42 RIM	191024	191024_435_LC1247	LC1247	30	5	3.5	0.181	0.012	0.02581	0.00053	0.13803	0.0513	0.0038	168	11	164.3	3.3	190	150	<0.77	153000	61	<490	3.39	0.11	<10	368.6	451500	0.627		<0.076	<0.0066	22.33	0.051	0.78	1.82	0.757	8	2.38	28.7	11.41	59	13.57	140.3	32.66	10630	0.15
YM42	CORE	YM42 CORE	191024	191024_436_LC1248	LC1248	30	5	3.5	0.181	0.014	0.02595	0.00057	0.13862	0.0506	0.004	168	12	165.2	3.6	180	170	<0.75	153000	130	<490	6.3	0.72	<11	1301	451200	1.08		<0.1	0.059	35.3	0.291	4.6	9.1	2.39	40	11.14	124	42.6	200.2	41.4	377	77.6	10490	0.29
YM42	RIM	YM42 RIM	191024	191024_437_LC1249	LC1249	30	5	3.5	0.789	0.063	0.03121	0.00093	0.45557	0.185	0.013	582	34	198.1	5.8	2630	110	19.1	153000	92	<490	5.3	0.217	45	423.4	458300	0.822		0.3	0.16	22.85	0.038	0.72	1.72	0.552	8.41	2.66	32.4	12.6	68	15.09	155.2	35.43	11080	0.282
AM4 DYKE	CORE	AM4 DYKE CORE	191024	191024_438_LC1250	LC1250	30	5	3.5	0.21	0.029	0.02679	0.00076	0.075006	0.0572	0.0082	191	25	170.4	4.8	340	300	340	153000	90	<730	7.9	0.35	42	569	478000	0.68		1.25	0.162	18.3	0.146	2.46	3.7	0.82	15.1	4.42	49.8	17.4	86.6	18	173.8	37.4	11110	0.277
AM4 DYKE	RIM	AM4 DYKE RIM	191024	191024_440_LC1251	LC1251	30	5	3.5	0.176	0.014	0.02561	0.00055	0.065583	0.0499	0.0039	163	12	163	3.5	130	160	2.81	153000	126	<450	6.48	0.358	<9.6	386	456200	0.832		0.31	0.087	19.18	0.072	0.93	1.75	0.409	8.13	2.38	30	11.69	61.8	13.96	140.2	31.5	11670	0.394
AM22	CORE	AM22 CORE	191024	191024_441_LC1252	LC1252	30	5	3.5	0.185	0.013	0.02484	0.00062	0.016157	0.0561	0.005	176	14	158.1	3.9	400	180	9	153000	481	<960	6.4	0.84	<22	946	487000	2.74		<0.26	0.45	54.3	0.199	2.25	4.19	1.08	22.6	6.49	81.2	30.4	147	32.4	322	66.8	12240	0.78
AM22	RIM	AM22 RIM	191024	191024_442_LC1253	LC1253	30	5	3.5	0.175	0.021	0.02654	0.00084	0.17558	0.0482	0.0058	162	18	168.8	5.3	50	230	<1.3	153000	100	<820	4.9	0.2	<18	479	475000	0.73		<0.055	0.0133	21	0.045	0.8	2.44	0.77	11.7	3.39	40.7	14.77	75.5	17	159.3	36.3	11330	0.219
AM22	CORE	AM22 CORE	191024	191024_443_LC1254	LC1254	30	5	3.5	0.185	0.012	0.02755	0.00058	0.13756	0.0491	0.0036	172	11	175.2	3.7	110	140	3.49	153000	278	<660	8.56	2.56	18.9	1440	462000	2.3		<0.098	0.41	44.7	0.341	5	10.7	2.31	46.9	13.1	140	48	212	43.1	387	76.5	10770	0.438
AM22	RIM	AM22 RIM	191024	191024_445_LC1255	LC1255	30	5	3.5
AM22	CORE	AM22 CORE	191024	191024_446_LC1256	LC1256	30	5	3.5	0.175	0.011	0.02614	0.0005	0.025827	0.0488	0.0033	162.9	9.4	166.3	3.1	100	140	35.5	153000	133	<530	6.26	0.273	<11	622	453000	1.149		0.24	<0.0069	29.9	0.072	1.29	2.86	0.92	14.11	4.33	51.6	19.76	97.4	21.31	207.2	45.2	10320	0.311
AM22	RIM	AM22 RIM	191024	191024_447_LC1257	LC1257	30	5	3.5	0.179	0.011	0.02611	0.00053	0.014844	0.0508	0.0036	166.7	9.9	166.1	3.4	180	140	1.01	153000	126	<570	6.27	0.334	<11	628	464000	1.68		<0.14	0.0078	43.6	0.092	1.57	4.43	1.06	18.4	5.18	57	20.1	97.1	20.6	196	42	10800	0.462
AM22	CORE	AM22 CORE	191024	191024_448_LC1258	LC1258	30	5	3.5	0.171	0.01	0.02472	0.0005	0.04504	0.0504	0.0032	159.3	8.8	157.4	3.1	170	130	<0.95	153000	109	<580	5.16	0.292	<12	477.6	473000	0.97		<0.13	<0.0093	21.98	0.043	0.62	1.95	0.688	9.38	2.89	35.6	14.14	74.8	17.7	191.1	47	11980	0.426
AM22	RIM	AM22 RIM	191024	191024_455_LC1259	LC1259	30	5	3.5	0.204	0.019	0.02795	0.00063	0.011489	0.0533	0.0052	186	16	177.7	4	240	190	<0.89	153000	119	<540	4.82	0.457	<11	419.4	446000	0.661		<0.11	<0.0055	18.76	0.0371	0.71	1.71	0.509	8.9	2.76	34.2	12.83	65.8	14.38	145.2	32.21	11220	0.275
AM22	CORE	AM22 CORE	191024	191024_456_LC1260	LC1260	30	5	3.5	0.173	0.02	0.0256	0.00079	0.019205	0.0498	0.006	160	17	162.9	4.9	70	220	3.23	153000	257	<600	6.04	0.3	<13	1313	463000	0.717		<0.11	0.0145	20	0.164	2.72	5.87	2.13	31.4	9.65	115.8	42.9	200	40.8	372	77	9260	0.287
AM22	RIM	AM22 RIM	191024	191024_457_LC1261	LC1261	30	5	3.5	0.183	0.016	0.02688	0.0007	0.043948	0.0499	0.0043	170	13	170.9	4.4	130	170	67	153000	36	<590	3.59	0.132	<12	323.5	458000	0.564		0.61	0.178	17	0.039	0.26	0.9	0.388	5.02	1.82	21.69	9.27	51.8	12.36	132.3	33	11070	0.155
AM22	CORE	AM22 CORE	191024	191024_458_LC1262	LC1262	30	5	3.5
AM22	RIM	AM22 RIM	191024	191024_460_LC1263	LC1263	30	5	3.5	0.171	0.016	0.02601	0.0006	0.0087743	0.0481	0.0046	159	14	165.5	3.7	50	190	1.61	153000	119	<480	5.94	0.258	<9.6	359.9	446200	0.574		<0.11	0.01	18.44	0.041	0.48	1.78	0.509	8.28	2.54	29.7	11.41	56.6	12.41	119	26.05	10360	0.245
AM22	CORE	AM22 CORE	191024	191024_461_LC1264	LC1264	30	5	3.5	0.63	0.1	0.03	0.0012	0.8365	0.153	0.021	485	63	190.7	7.7	2130	260	1.49	153000	80	<460	4.01	0.198	107	286.6	437800	0.319		1.6	0.108	11.51	0.046	0.67	1.16	0.452	5.47	1.606	20.6	8.18	44.4	11.07	119.1	30.34	10400	0.105
AM22	RIM	AM22 RIM	191024	191024_462_LC1265	LC1265	30	5	3.5
AM22	CORE	AM22 CORE	191024	191024_463_LC1266	LC1266	30	5	3.5
AM22	RIM	AM22 RIM	191024	191024_465_LC1267	LC1267	30	5	3.5	0.204	0.018	0.02616	0.00072	0.10694	0.0565	0.005	187	15	166.4	4.5	440	200	0.91	153000	85	<460	4.41	0.124	<8.7	263.5	473000	0.495		<0.095	0.036	15.24	0.0233	0.61	1.08	0.377	5.55	1.72	20.8	7.94	40.3	8.95	89.5	19.97	11490	0.181
AM22	CORE	AM22 CORE	191024	191024_466_LC1268	LC1268	30	5	3.5	0.1744	0.0089	0.02441	0.0005	0.090755	0.0522	0.0029	163	7.8	155.4	3.2	270	130	5.3	153000	267	<690	5.4	2.19	<15	2946	436000	3.29		0.21	0.231	93.3	0.565	8.5	18.9	4.6	89.5	24.76	276.8	95.2	447	90.7	819	164.8	10150	0.84
AM22	RIM	AM22 RIM	191024	191024_467_LC1269	LC1269	30	5	3.5	0.19	0.028	0.02654	0.00099	0.021015	0.0527	0.0084	176	24	168.8	6.2	230	310	2.9	153000	80	<950	4.7	0.52	<18	395	460000	0.557		<0.28	0.115	24.4	0.053	0.62	1.77	0.67	9.2	2.67	29.5	12.02	58.3	13.41	133	30.8	10820	0.194
AM22	CORE	AM22 CORE	191024	191024_468_LC1270	LC1270	30	5	3.5	0.235	0.022	0.02828	0.00082	0.1519	0.0606	0.0057	212	18	179.7	5.1	480	200	306	153000	114	<440	10.4	0.21	10.5	411	450300	0.524		2.93	0.114	15.22	0.069	1	2.05	0.68	9.36	2.96	35	12.95	66	14.61	143.9	31.8	9870	0.172
AM22	RIM	AM22 RIM	191024	191024_470_LC1271	LC1271	30	5	3.5	0.161	0.014	0.02543	0.00059	0.083421	0.046	0.0041	150	12	161.9	3.7	10	170	<1	153000	51	<580	3.67	0.12	<12	257.7	455000	0.453		<0.091	<0.007	20.13	0.035	0.5	1.14	0.462	5.42	1.58	18.54	7.32	39.9	9.67	108.2	25.85	10690	0.118
AM22	CORE	AM22 CORE	191024	191024_471_LC1272	LC1272	30	5	3.5	0.197	0.014	0.02654	0.00055	0.022318	0.0542	0.004	182	11	168.8	3.4	300	150	<0.91	153000	292	<550	11.3	0.484	42	956	444000	1.44		<0.11	0.0103	27.6	0.106	1.67	3.99	1.11	19.3	6.16	77.6	29.5	148.6	32.6	303	63.7	9010	0.426
AM22	RIM	AM22 RIM	191024	191024_472_LC1273	LC1273	30	5	3.5	0.182	0.012	0.02553	0.00048	0.074884	0.0519	0.0034	169	10	162.5	3	230	130	<0.9	153000	55	<570	4.21	0.233	<12	307.7	456000	0.825		<0.089	0.0137	23.24	0.048	0.62	1.5	0.597	6.59	2.09	22.5	8.86	46.9	11.73	123.1	29.73	11190	0.247
AM22	RIM	AM22 RIM	191024	191024_473_LC1274	LC1274	30	5	3.5	0.191	0.021	0.02549	0.00078	0.063475	0.0543	0.0061	176	18	162.2	4.9	270	230	102	153000	55	<860	4.8	<0.18	<17	368	484000	0.421		0.24	0.076	15.03	0.038	0.58	1.76	0.53	8.3	2.34	28.6	10.9	58.2	13.1	145	34.8	11420	0.176
AM22	RIM	AM22 RIM	191024	191024_475_LC1275	LC1275	30	5	3.5	0.192	0.017	0.02592	0.00067	0.24363	0.0528	0.0044	177	15	164.9	4.2	280	190	5.09	153000	107	<570	7.7	0.289	19.5	479	445000	0.713		0.35	0.171	20.78	0.068	0.9	2.34	0.713	11.23	3.46	39.1	14.85	73.1	16.48	161.1	34.9	10750	0.287
AC25	CORE	AC25 CORE	191025	191025_006_LC1276	LC1276	30	5	3.5	0.278	0.023	0.0298	0.0012	0.31677	0.0675	0.0051	248	18	189.2	7.5	820	150	9.8	153000	153	<350	9.5	0.634	43	749	449000	0.755		1.21	0.214	23.3	0.215	2.98	5.17	1.49	23.4	6.15	68.2	24.2	114	23.4	218	46.9	9950	0.393
AC25	RIM	AC25 RIM	191025	191025_007_LC1277	LC1277	30	5	3.5
AC25	CORE	AC25 CORE	191025	191025_008_LC1278	LC1278	30	5	3.5	0.214	0.028	0.02802	0.00096	0.29694	0.0544	0.0068	195	23	178.1	6	270	260	67	153000	71	<410	3.7	0.28	42	259	415600	0.357		0.25	0.038	9.6	0.0287	0.49	1.28	0.536	4.87	1.44	17.9	7.34	39.2	9.52	101.1	25.6	9860	0.125
AC25	RIM	AC25 RIM	191025	191025_010_LC1279	LC1279	30	5	3.5	0.216	0.026	0.0272	0.0011	0.65153	0.0559	0.0056	198	22	172.9	6.8	410	230	21.7	153000	62	<490	5.4	1.68	450	398	440500	0.69		0.94	0.041	20.64	0.041	0.7	1.84	0.621	7.13	2.21	27.3	11.04	61.9	14.83	165.3	41.2	10580	0.18
AC25	CORE	AC25 CORE	191025	191025_011_LC1280	LC1280	30	5	3.5	0.208	0.018	0.02837	0.00085	0.036197	0.0527	0.0047	195	13	180.3	5.3	270	200	11.6	153000	48	<410	2.8	0.151	<12	366.8	429700	0.453		<0.079	0.0143	14.11	0.0292	0.64	1.36	0.65	6.77	2.03	24.86	10.52	59.6	14.04	151.4	39.3	10050	0.127
AC25	RIM	AC25 RIM	191025	191025_012_LC1281	LC1281	30	5	3.5	0.19	0.014	0.02692	0.00056	0.22292	0.0505	0.0036	176	12	171.3	3.5	180	150	1.03	153000	46	<360	3.11	0.109	11.4	305	431300	0.538		<0.083	<0.007	15.72	0.0218	0.37	1	0.465	5.32	1.56	20.09	8.48	48.8	11.62	126.5	33.3	10170	0.131
AC25	CORE	AC25 CORE	191025	191025_013_LC1282	LC1282	30	5	3.5	0.214	0.023	0.02713	0.00099	0.0060522	0.0563	0.0063	196	19	172.5	6.2	380	240	14.4	153000	57	<460	4.09	0.199	15.8	525	431000	0.399		0.6	0.088	18.2	0.144	2.2	3.45	1.15	12.5	3.4	40.8	15.5	80.9	18.27	178.3	44.8	9920	0.151
AC25	RIM	AC25 RIM	191025	191025_015_LC1283	LC1283	30	5	3.5	0.21	0.033	0.0273	0.0012	0.16397	0.0583	0.0097	192	28	173.4	7.6	440	360	2.37	153000	53	<370	4.8	0.24	<12	485	450000	0.81		<0.13	0.033	24.2	0.044	0.93	2	0.84	9.28	2.76	34.6	14.28	76.3	18.18	185.8	43.5	9750	0.201
AC25	CORE	AC25 CORE	191025	191025_016_LC1284	LC1284	30	5	3.5	0.241	0.014	0.03292	0.00056	0.33221	0.0518	0.0028	219	11	208.8	3.5	260	120	10.8	153000	370	<390	4.14	3.07	87	1920	452300	9.5		0.93	0.073	31.9	0.088	1.55	4.31	0.438	30.2	11.1	154	63.1	327	69.5	648	136	10740	4
AC25	RIM	AC25 RIM	191025	191025_017_LC1285	LC1285	30	5	3.5
AC25	CORE	AC25 CORE	191025	191025_018_LC1286	LC1286	30	5	3.5	0.213	0.027	0.0272	0.0012	0.46492	0.0573	0.0071	194	22	173	7.4	380	240	16.6	153000	105	<430	9.5	1.61	630	640	440000	0.411		1	0.124	15.83	0.119	1.6	4.03	1.13	17.1	4.86	56.6	20.4	99.4	20.9	194	41.2	10260	0.211
AC25	RIM	AC25 RIM	191025	191025_020_LC1287	LC1287	30	5	3.5
AC25	CORE	AC25 CORE	191025	191025_021_LC1288	LC1288	30	5	3.5	0.227	0.019	0.02655	0.00056	0.40537	0.0601	0.0044	207	15	168.9	3.5	540	160	39.8	153000	45	<390	5.76	0.124	18.7	538	445800	0.713		0.77	0.052	20.5	0.081	1.08	1.95	0.91	9.75	2.75	37.7	15.74	84.1	19.85	212	53	9980	0.185
AC25	RIM	AC25 RIM	191025	191025_022_LC1289	LC1289	30	5	3.5
AC25	RIM	AC25 RIM	191025	191025_023_LC1290	LC1290	30	5	3.5
AC25	CORE	AC25 CORE	191025	191025_025_LC1291	LC1291	30	5	3.5	0.192	0.025	0.0258	0.001	0.051233	0.0547	0.0075	177	22	164.3	6.3	320	290	174	153000	83	<440	6.3	0.9	89	411	466000	0.569		1.58	0.157	18.4	0.236	2.42	3.09	1.08	10.7	2.76	32.3	12.18	63.8	15.3	166	39.5	10830	0.165
AC25	RIM	AC25 RIM	191025	191025_026_LC1292	LC1292	30	5	3.5	0.205	0.016	0.02704	0.00063	0.28044	0.0554	0.0042	189	14	172	4	380	160	1.08	153000	51	<380	4.27	0.155	<11	442	476000	0.767		0.047	0.0085	23.71	0.048	0.9	1.77	0.817	8.69	2.49	30.9	12.92	70.6	16.7	178	43	10690	0.193
AC25	RIM	AC25 RIM	191025	191025_027_LC1293	LC1293	30	5	3.5	0.191	0.017	0.0268	0.001	0.053715	0.0515	0.0047	177	14	170.6	6.3	220	190	7.9	153000	37	<390	3.28	0.131	<10	412	456000	0.468		0.16	0.02	15.35	0.099	1.28	1.79	0.92	8.7	2.65	28.9	11.88	63.2	14.69	166	42.3	10190	0.09
AC25	CORE	AC25 CORE	191025	191025_028_LC1294	LC1294	30	5	3.5	0.194	0.032	0.02746	0.00089	0.094413	0.0501	0.0086	177	26	174.6	5.6	60	320	1.05	153000	72	<410	6.64	0.243	<11	434.1	435900	0.61		<0.11	0.0173	15.77	0.039	0.84	1.73	0.516	10.24	3.04	36.5	13.74	68.3	15.05	145.8	31.78	10330	0.287
AC25	RIM	AC25 RIM	191025	191025_035_LC1295	LC1295	30	5	3.5	0.209	0.027	0.02812	0.00079	0.15136	0.0521	0.0065	191	22	178.8	4.9	200	260	2.26	153000	85	<450	6.26	0.273	<13	342	454000	0.643		0.34	0.048	14.36	0.031	0.74	1.48	0.311	7.82	2.35	28.5	10.67	53.8	12.03	117.9	26	10690	0.21
AC25	CORE	AC25 CORE	191025	191025_036_LC1296	LC1296	30	5	3.5	0.177	0.01	0.02639	0.00063	0.018796	0.0479	0.003	165.3	8.7	167.9	4	80	130	3.06	153000	118	<380	5.69	0.336	<10	827	459000	1.71		<0.087	0.0178	42.5	0.099	2.03	3.92	1.36	20.2	5.94	71	26.54	130.9	28.68	273.4	59.4	10930	0.579
AC25	RIM	AC25 RIM	191025	191025_037_LC1297	LC1297	30	5	3.5	0.183	0.014	0.0268	0.00054	0.14545	0.0485	0.0035	170	12	170.5	3.4	80	150	29	153000	100	<330	5.86	0.378	<8.6	566	464100	1		0.23	0.206	23.4	0.095	1.48	2.72	0.891	13.37	3.91	46.7	17.7	88.2	19.39	187.1	41.1	10570	0.296
AC25	CORE	AC25 CORE	191025	191025_038_LC1298	LC1298	30	5	3.5	0.204	0.02	0.0271	0.00079	0.25786	0.0544	0.005	187	17	172.4	5	330	200	370	153000	40	<430	19	0.52	347	374	454000	0.644		3.4	0.196	17.3	0.075	1.13	1.25	0.6	6.5	2.03	25.2	10.46	60	14.8	156	39.5	10190	0.134
AC25	RIM	AC25 RIM	191025	191025_040_LC1299	LC1299	30	5	3.5	0.2	0.011	0.02737	0.00048	0.098583	0.0511	0.0029	184.5	9	174.1	3	220	120	<0.76	153000	69	<510	3.91	0.228	<13	472.5	435400	0.914		<0.17	<0.0077	31.18	0.071	1.09	2.34	0.66	9.96	2.81	35.4	13.92	75.7	17.6	184.9	44.6	10250	0.224
AC25	RIM	AC25 RIM	191025	191025_041_LC1300	LC1300	30	5	3.5	-0.6	7.7	0.07	0.058	0.51252	0.21	0.17	1080	360	370	340	2300	1500	320	153000	300	2000	30	39	17000	280	356000	0.32		13.5	0.39	10	0.34	<0.85	1.11	0.44	4.3	1.3	14.1	6.3	34.5	9.8	95	22.8	6870	0.73
AC25	CORE	AC25 CORE	191025	191025_042_LC1301	LC1301	30	5	3.5
AC25	RIM	AC25 RIM	191025	191025_043_LC1302	LC1302	30	5	3.5	0.197	0.019	0.02687	0.00053	0.13183	0.0514	0.0049	182	16	170.9	3.4	200	190	<0.61	153000	31	<430	3.2	0.121	<11	351	452000	0.451		<0.08	0.0075	13.94	0.057	0.92	1.66	0.73	7.04	2.02	25.2	9.92	55.8	13.94	149.6	40.7	10220	0.076
AC25	CORE	AC25 CORE	191025	191025_045_LC1303	LC1303	30	5	3.5	0.17	0.027	0.02716	0.00092	0.23339	0.0445	0.0075	158	23	172.8	5.8	-40	340	2.02	153000	81	<590	4.61	1.55	18.8	679	435000	0.552		0.81	0.19	21.6	0.264	3.88	6.06	2.04	23	5.97	60.9	21.75	105.8	22.14	212.9	44.8	9330	0.173
AC25	RIM	AC25 RIM	191025	191025_046_LC1304	LC1304	30	5	3.5	0.306	0.036	0.0264	0.001	0.025376	0.086	0.012	279	33	167.7	6.5	1180	290	635	153000	81	<830	19	6.05	6400	660	432700	0.57		18.4	0.098	21.1	0.193	2.63	4	1.88	19.5	5.03	56	21.25	104.7	22.44	221	48.4	9470	0.199
AC25	RIM	AC25 RIM	191025	191025_047_LC1305	LC1305	30	5	3.5
AC25	CORE	AC25 CORE	191025	191025_048_LC1306	LC1306	30	5	3.5	0.185	0.014	0.02633	0.00051	0.042216	0.0496	0.004	171	12	167.5	3.2	130	160	<0.63	153000	93	<400	3.42	0.15	<10	944	456100	0.633		<0.07	0.0183	25.43	0.22	3.67	6.6	2.71	27	7.21	81	29.92	148.9	31.9	315.7	72.8	9890	0.15
AC25	RIM	AC25 RIM	191025	191025_050_LC1307	LC1307	30	5	3.5	0.203	0.021	0.02638	0.00058	0.05878	0.055	0.0058	186	18	167.8	3.7	350	210	2.18	153000	44	<510	3.11	0.226	<13	339.5	479400	0.575		<0.051	0.0128	21.53	0.038	1.09	1.35	0.77	7.97	2.12	26	9.98	51.7	12.54	125	31.1	11030	0.147
AC25	CORE	AC25 CORE	191025	191025_051_LC1308	LC1308	30	5	3.5	0.188	0.015	0.02687	0.00061	0.073221	0.0496	0.0039	174	12	170.9	3.8	170	170	8.5	153000	53	<440	4.21	0.15	<11	340	464500	0.45		0.058	0.052	14.67	0.057	1.02	1.3	0.618	6.48	1.92	24.4	9.78	54.2	13.23	144.5	36.6	10550	0.142
AC25	RIM	AC25 RIM	191025	191025_052_LC1309	LC1309	30	5	3.5	0.184	0.012	0.02624	0.00047	0.14934	0.0495	0.0031	171	10	167	3	140	130	67	153000	63	<390	5.39	0.209	<9.9	520	456000	0.853		0.9	0.064	34.3	0.071	0.92	2.46	1.23	11.04	3.05	37.2	14.92	82.7	19.6	209	52.5	10350	0.201
AC25	CORE	AC25 CORE	191025	191025_053_LC1310	LC1310	30	5	3.5	0.182	0.018	0.02591	0.00079	0.21101	0.0505	0.0057	169	15	164.9	5	130	220	8.5	153000	207	<470	14.2	0.49	15.3	587	459000	0.674		0.3	0.062	16.28	0.161	2.24	3.48	1.03	16.04	4.79	53	18.79	89	18.62	178.9	38.65	9390	0.246
AC25	RIM	AC25 RIM	191025	191025_055_LC1311	LC1311	30	5	3.5	0.208	0.03	0.02665	0.00091	0.045274	0.0557	0.0086	190	25	169.6	5.7	310	300	7.2	153000	160	<540	11.1	0.303	46	505	459000	0.95		0.91	0.277	19.93	0.092	1.21	2.42	0.59	10.96	3.7	40.3	15.98	77.7	17.36	166.3	36.61	11220	0.527
AC25	CORE	AC25 CORE	191025	191025_056_LC1312	LC1312	30	5	3.5
AC25	RIM	AC25 RIM	191025	191025_057_LC1313	LC1313	30	5	3.5
AC25	CORE	AC25 CORE	191025	191025_058_LC1314	LC1314	30	5	3.5	0.187	0.016	0.02705	0.00057	0.22337	0.0519	0.0047	173	14	172	3.6	200	180	<0.62	153000	38	<390	2.77	<0.1	<11	351	473000	0.351		<0.069	0.0137	14.08	0.057	1.08	1.83	0.866	8.31	2.17	25.7	10.3	55.7	13.1	144.5	36.49	11050	0.082
AC25	RIM	AC25 RIM	191025	191025_065_LC1315	LC1315	30	5	3.5	0.255	0.024	0.02563	0.0008	0.056421	0.0734	0.0069	229	19	163.1	5.1	920	220	26	153000	50	<530	5.5	0.78	748	227	439700	0.299		1.41	0.03	11.5	0.049	0.45	1.19	0.593	5.13	1.4	17.1	6.55	33.4	7.86	81.4	20.51	10550	0.076
AC25	CORE	AC25 CORE	191025	191025_066_LC1316	LC1316	30	5	3.5	0.178	0.014	0.0271	0.00051	0.086099	0.0486	0.004	166	12	172.3	3.2	90	160	<0.67	153000	80	<440	3.45	0.122	<12	503	449500	0.704		<0.15	0.0079	21.95	0.066	0.74	1.94	0.773	9.93	2.96	35.7	14.67	78.7	18.7	196	47.8	10230	0.177
AC25	RIM	AC25 RIM	191025	191025_067_LC1317	LC1317	30	5	3.5	0.192	0.013	0.02721	0.00059	0.33263	0.0519	0.0034	177	11	173.1	3.7	240	140	<0.67	153000	54	<440	2.79	0.194	<11	339.7	453800	0.461		<0.027	<0.0078	18.66	0.0291	0.5	1.43	0.653	7.21	2.17	26.4	10.11	53.3	12.45	128	31.2	10050	0.127
AC25	CORE	AC25 CORE	191025	191025_068_LC1318	LC1318	30	5	3.5	0.181	0.016	0.02647	0.00059	0.26137	0.0501	0.0041	168	14	168.4	3.7	150	170	34	153000	83	<440	3.82	0.45	<12	790	448300	0.93		0.17	0.126	29.4	0.126	1.95	4.61	1.7	22.8	6.5	74	26	122	24.9	222	47.1	10630	0.17
AC25	RIM	AC25 RIM	191025	191025_070_LC1319	LC1319	30	5	3.5	0.199	0.017	0.02731	0.00052	0.11987	0.0541	0.0044	183	14	173.7	3.3	300	170	3.77	153000	45	<410	2.82	<0.11	<11	265.7	451600	0.398		<0.074	0.008	14.85	0.0323	0.37	1.02	0.497	5.24	1.459	19	7.51	41.4	10.41	112.7	29.5	10480	0.091
YM43	CORE	YM43 CORE	191025	191025_071_LC1320	LC1320	30	5	3.5	0.186	0.015	0.02719	0.00046	0.18407	0.0495	0.0032	172	12	172.9	2.9	200	150	5.1	153000	155	<430	5.98	0.341	<11	965	469000	1.5		0.25	0.26	38.9	0.192	2.8	4.98	1.44	22.6	7.04	83.5	30.5	153	33.8	328	70.1	10180	0.427
YM43	RIM	YM43 RIM	191025	191025_072_LC1321	LC1321	30	5	3.5	0.196	0.013	0.02733	0.00052	0.36501	0.0545	0.0035	181	11	173.8	3.3	350	140	2.51	153000	77	<480	3.95	0.187	<12	341.1	478000	0.649		0.21	0.043	22.48	0.051	0.71	1.75	0.641	7.53	2.31	29	10.7	54.3	12.82	131	29.79	10890	0.176
YM43	CORE	YM43 CORE	191025	191025_073_LC1322	LC1322	30	5	3.5	0.171	0.015	0.02647	0.00066	0.12403	0.0491	0.0043	160	13	168.4	4.2	120	180	58	153000	64	<420	6.09	0.156	<12	465	466000	0.497		0.45	0.043	21.11	0.116	1.56	3.46	1.12	12.25	3.48	39.8	14	72.2	16.02	164	37.5	11230	0.167
YM43	RIM	YM43 RIM	191025	191025_075_LC1323	LC1323	30	5	3.5	0.18	0.011	0.02724	0.00069	0.11145	0.0503	0.0033	167.2	9.8	173.2	4.3	180	140	0.9	153000	69	<380	5.3	0.118	<9.4	542	463000	0.899		<0.16	0.0031	30.5	0.063	1.1	1.94	1.02	11.8	3.51	41.7	16.3	84.8	20	207	49.1	10300	0.228
YM43	CORE	YM43 CORE	191025	191025_076_LC1324	LC1324	30	5	3.5	0.173	0.015	0.02751	0.00078	0.32532	0.0471	0.0048	161	13	174.9	4.9	20	200	<0.63	153000	51	<390	3.02	0.154	<11	328	465000	0.422		<0.094	<0.009	14.3	0.043	0.71	1.81	0.637	7.77	2.31	25.6	9.72	50.2	11.68	121.7	28.4	10990	0.111
YM43	RIM	YM43 RIM	191025	191025_077_LC1325	LC1325	30	5	3.5	0.1905	0.009	0.02668	0.00048	0.10959	0.0532	0.0026	176.7	7.6	169.7	3	300	110	<0.55	153000	62	<380	3.37	0.164	<9.7	531	460300	0.779		<0.11	<0.0073	29.4	0.085	1.27	2.92	0.97	12.88	3.7	42.5	16.16	83.3	18.75	193.1	45	10660	0.168
YM43	CORE	YM43 CORE	191025	191025_078_LC1326	LC1326	30	5	3.5	0.19	0.053	0.0271	0.0012	0.076283	0.052	0.015	173	47	172.3	7.6	140	600	4.9	153000	160	<660	14.7	0.94	<18	510	449000	0.57		1.69	0.102	17.29	0.11	2.06	4.77	0.9	16.3	4.35	46.6	17.3	75.7	15.69	146.7	30.4	9810	0.27
YM43	RIM	YM43 RIM	191025	191025_080_LC1327	LC1327	30	5	3.5	0.226	0.029	0.02669	0.00076	0.12987	0.0624	0.0081	205	24	169.8	4.8	550	270	24.7	153000	93	<580	6.7	<0.16	<16	300.9	462300	0.56		<0.17	0.04	16.77	0.035	0.24	1.07	0.47	6.21	2.03	23.9	9	48.8	10.52	109.5	25.51	11020	0.232
YM43	RIM	YM43 RIM	191025	191025_081_LC1328	LC1328	30	5	3.5	0.249	0.026	0.02804	0.00086	0.092315	0.0663	0.0076	224	21	178.2	5.4	680	230	158	153000	179	<420	16.8	0.364	14.6	456.2	451000	0.589		0.97	0.134	12.68	0.084	0.91	2.32	0.83	10.98	3.32	38	14.15	71.1	15.72	148.5	33.39	9130	0.356
YM43	RIM	YM43 RIM	191025	191025_082_LC1329	LC1329	30	5	3.5
YM43	CORE	YM43 CORE	191025	191025_083_LC1330	LC1330	30	5	3.5	0.219	0.012	0.02708	0.00058	0.03512	0.0599	0.0035	201	10	172.2	3.6	550	130	699	153000	94	<410	9.72	0.217	53.5	660	458300	0.85		3.32	0.178	27.2	0.133	2.2	4.47	1.19	18.3	5.04	59.2	20.7	102	22.1	211	46.4	10850	0.233
YM43	RIM	YM43 RIM	191025	191025_085_LC1331	LC1331	30	5	3.5	9.1	6.7	0.113	0.072	0.86801	0.3	0.13	1170	480	590	330	2140	700	890	153000	<33	<570	32	0.82	160	319	455000	0.58		7.5	0.59	17.47	0.094	0.74	1.17	0.64	6.5	1.76	24.7	10.05	50.3	11.96	122.4	31.5	9870	0.34
YM43	RIM	YM43 RIM	191025	191025_086_LC1332	LC1332	30	5	3.5	0.204	0.014	0.02578	0.00048	0.26385	0.0588	0.0041	187	12	164.1	3	470	150	19.8	153000	96	<320	4.91	0.373	102	657	491900	0.683		0.29	0.055	22.28	0.145	2.63	3.98	1.515	17.05	4.86	54.4	20	100.5	22.94	236.1	52.9	11070	0.237
YM43	CORE	YM43 CORE	191025	191025_087_LC1333	LC1333	30	5	3.5
YM43	RIM	YM43 RIM	191025	191025_088_LC1334	LC1334	30	5	3.5
YM43	CORE	YM43 CORE	191025	191025_095_LC1335	LC1335	30	5	3.5	0.177	0.016	0.02629	0.00065	0.32307	0.0487	0.0046	167	15	167.3	4.1	80	180	<0.58	153000	96	<360	4.63	0.195	<9.9	646	466000	0.739		<0.063	<0.0059	23.5	0.087	1.57	3.56	1.05	16.5	4.77	54.4	20.01	102.6	21.8	213	45.8	10580	0.261
YM43	RIM	YM43 RIM	191025	191025_096_LC1336	LC1336	30	5	3.5	0.224	0.024	0.02636	0.00075	0.31065	0.0606	0.0065	203	19	167.7	4.7	540	230	18.5	153000	43	<370	5.3	0.23	12.1	249.6	457900	0.5		0.19	0.12	11.73	0.062	0.56	0.76	0.47	4.56	1.271	16.24	7.19	40.6	9.92	111	29	10620	0.133
YM43	RIM	YM43 RIM	191025	191025_097_LC1337	LC1337	30	5	3.5	0.191	0.014	0.02599	0.00062	0.27102	0.0518	0.0037	176	12	165.4	3.9	230	150	85	153000	57	<370	4.21	0.115	<9.1	539	460800	0.457		0.49	0.055	19.79	0.138	1.95	2.95	1.192	13.73	3.77	43.7	16.76	85.9	19.3	196.1	45.7	10680	0.15
YM43	RIM	YM43 RIM	191025	191025_098_LC1338	LC1338	30	5	3.5	0.176	0.016	0.02702	0.0007	0.036177	0.0469	0.0044	164	14	171.8	4.4	30	190	<0.73	153000	59	<470	4.2	<0.13	<12	473	468000	0.626		<0.18	<0.0064	19.91	0.101	1.13	2.04	0.91	9.33	2.83	34.4	13.84	75.6	17.76	191	46.4	10180	0.209
YM43	CORE	YM43 CORE	191025	191025_100_LC1339	LC1339	30	5	3.5	0.204	0.015	0.02673	0.00068	0.17807	0.0534	0.0038	188	12	170	4.3	300	150	1.39	153000	160	<450	6.26	0.364	<10	1140	447000	1.47		0.124	0.044	39.7	0.191	3.16	6.46	1.87	30.7	9.16	103.2	37.6	181.3	38.5	360	73.4	10160	0.425
YM43	RIM	YM43 RIM	191025	191025_101_LC1340	LC1340	30	5	3.5	0.326	0.021	0.02772	0.00072	0.29927	0.0827	0.0053	285	16	176.2	4.5	1200	130	8.8	153000	120	<440	7.01	0.48	24.5	487	445400	0.91		0.81	0.072	23.9	0.083	1.34	2.25	0.738	10.99	3.28	39.9	15.46	76	17.16	167.5	36	10190	0.349
YM43	CORE	YM43 CORE	191025	191025_102_LC1341	LC1341	30	5	3.5	0.265	0.026	0.02688	0.00072	0.31804	0.0687	0.0065	237	21	171	4.5	790	200	270	153000	104	<400	7.8	2.84	47	564.1	450000	0.561		14.9	0.075	15.05	0.131	1.95	3.38	1.14	14.75	4.41	49.7	17.63	87.3	18.79	179.8	39.3	10570	0.172
YM43	RIM	YM43 RIM	191025	191025_103_LC1342	LC1342	30	5	3.5	0.258	0.018	0.02706	0.00052	0.042981	0.0668	0.0046	231	15	172.1	3.3	740	150	26	153000	45	<350	4.04	1.95	<8.7	263.9	460000	0.46		0.72	0.074	12.66	0.087	0.9	1.22	0.438	4.73	1.383	18.52	7.42	42.3	10.68	117.3	30.13	10650	0.157
YM43	RIM	YM43 RIM	191025	191025_105_LC1343	LC1343	30	5	3.5
YM43	CORE	YM43 CORE	191025	191025_106_LC1344	LC1344	30	5	3.5
YM43	RIM	YM43 RIM	191025	191025_107_LC1345	LC1345	30	5	3.5
YM43	RIM	YM43 RIM	191025	191025_108_LC1346	LC1346	30	5	3.5
YM43	CORE	YM43 CORE	191025	191025_110_LC1347	LC1347	30	5	3.5	0.248	0.051	0.0277	0.0011	0.11443	0.063	0.014	222	42	176.2	7.1	520	480	5.3	153000	189	<630	8	0.42	18	683	422000	0.5		0.71	0.099	16.83	0.109	1.59	3.9	1.08	18.7	5.26	60.9	21.9	106.4	22.4	212	44.2	9370	0.21
YM43	RIM	YM43 RIM	191025	191025_111_LC1348	LC1348	30	5	3.5	0.207	0.015	0.02729	0.00059	0.19471	0.0531	0.004	190	13	173.6	3.7	270	150	0.88	153000	340	<370	7.84	0.315	<8.8	795	452300	1.2		<0.12	0.78	29.2	0.22	2.35	3.65	1.14	18.4	5.56	65.9	25	127.1	27.1	263	57	9700	0.335
YM43	RIM	YM43 RIM	191025	191025_112_LC1349	LC1349	30	5	3.5	0.199	0.014	0.02807	0.00053	0.021073	0.0498	0.0036	184	11	178.4	3.3	140	150	<0.63	153000	100	<410	4.81	0.263	<9.8	574	435800	0.882		0.089	0.008	24.44	0.084	1.07	2.75	0.84	12.44	3.71	46.2	17.57	89.9	20.13	202.6	46	10030	0.258
YM43	CORE	YM43 CORE	191025	191025_113_LC1350	LC1350	30	5	3.5	0.211	0.018	0.02674	0.00053	0.22074	0.0544	0.0045	194	15	170.1	3.3	340	170	209	153000	209	<470	8.3	0.63	23.4	865	427000	1.88		0.59	0.57	42.9	0.318	3.04	4.91	1.23	23.7	7.27	77.7	28.3	132.9	28.2	265.8	55.1	9710	0.514
YM43	RIM	YM43 RIM	191025	191025_115_LC1351	LC1351	30	5	3.5
YM43	CORE	YM43 CORE	191025	191025_116_LC1352	LC1352	30	5	3.5	0.175	0.017	0.0276	0.001	0.19969	0.0462	0.0043	163	14	175.5	6.4	0	190	<0.84	153000	85	<560	3.25	<0.15	<14	547	452000	0.75		<0.15	<0.01	23.25	0.085	1.42	2.47	0.94	11.3	3.23	40.4	16.09	85.9	20.19	210	49.7	10340	0.232
YM43	RIM	YM43 RIM	191025	191025_117_LC1353	LC1353	30	5	3.5	0.21	0.019	0.02788	0.00061	0.12195	0.0534	0.005	192	16	177.2	3.8	270	190	0.86	153000	57	<440	2.82	0.301	<11	360	451200	0.595		<0.12	0.0103	16.98	0.041	0.84	1.27	0.638	7.11	2.04	25.4	10.79	58	13.5	150.6	37.1	10520	0.167
YM43	RIM	YM43 RIM	191025	191025_118_LC1354	LC1354	30	5	3.5	0.229	0.055	0.0259	0.0011	0.6294	0.061	0.013	207	45	165	7.2	530	450	11.1	153000	64	<770	2.8	3.84	25	434	428000	0.39		1.36	0.199	16.4	0.34	3	2.41	1.01	9.89	2.59	29.1	11.9	64.8	15.7	178	44.7	9610	0.157
YM43	CORE	YM43 CORE	191025	191025_125_LC1355	LC1355	30	5	3.5	0.179	0.021	0.02668	0.0008	0.37198	0.0484	0.0065	167	18	169.7	5	80	270	157	153000	67	<510	5.4	<0.13	13	342	442000	0.43		1.18	0.035	15.7	0.047	0.77	1.36	0.6	6.51	1.91	25.3	10.05	56.6	12.73	136	34.2	10050	0.141
YM43	RIM	YM43 RIM	191025	191025_126_LC1356	LC1356	30	5	3.5	0.259	0.02	0.02737	0.00066	0.3349	0.0684	0.0053	232	16	174.1	4.1	790	170	2110	153000	109	<410	21	0.307	137	641	418500	0.741		14.5	0.56	26.8	0.166	2.43	3.72	1.47	17.6	4.94	56.1	20.8	104.2	22.6	220.5	52	9270	0.198
YM43	CORE	YM43 CORE	191025	191025_127_LC1357	LC1357	30	5	3.5	0.213	0.06	0.0264	0.0019	0.46676	0.057	0.015	195	50	168	12	420	530	<1.4	153000	89	<940	3.8	0.99	<24	768	440000	0.66		0.35	0.032	25.1	0.19	1.83	4.75	1.49	20.7	6.07	72.3	24.9	119.5	24	223	49	10180	0.21
YM43	RIM	YM43 RIM	191025	191025_128_LC1358	LC1358	30	5	3.5	0.204	0.016	0.02675	0.00053	0.28549	0.0553	0.0048	188	14	170.2	3.3	360	180	121	153000	67	<440	3.62	0.19	<10	358.3	440400	0.65		1.26	0.04	20.71	0.041	0.6	1.4	0.564	6.69	2.01	26.62	10.4	56.4	13.71	148	37.8	10550	0.17
YM43	CORE	YM43 CORE	191025	191025_130_LC1359	LC1359	30	5	3.5	0.184	0.011	0.02579	0.00053	0.28618	0.051	0.0026	170.8	9	164.1	3.3	230	120	7.3	153000	139	<380	6.21	0.66	11.3	864	461700	1.7		0.8	0.104	41.1	0.188	3.14	5.68	1.38	25.1	7.12	77.8	28.1	133.2	28.88	270.3	56.6	10760	0.439
YM43	RIM	YM43 RIM	191025	191025_131_LC1360	LC1360	30	5	3.5	0.203	0.017	0.02583	0.00065	0.12123	0.0571	0.0047	186	14	164.4	4.1	410	170	780	153000	92	<360	9.9	1.16	285	416.4	450600	0.784		5.4	0.159	22.53	0.161	1.68	2.47	0.689	9.62	2.79	33.76	12.74	63.6	14.42	141.1	30.55	10600	0.226
YM43	RIM	YM43 RIM	191025	191025_132_LC1361	LC1361	30	5	3.5	0.221	0.025	0.02853	0.00088	0.039454	0.0569	0.0067	202	20	181.3	5.5	410	230	6.2	153000	72	<480	5.9	<0.12	12.4	666	473000	1.05		1.05	0.08	32.1	0.058	1.44	2.34	1.06	13.6	4.29	53.7	20.4	104	22.1	219	46.2	10510	0.318
YM43	CORE	YM43 CORE	191025	191025_133_LC1362	LC1362	30	5	3.5
YM43	RIM	YM43 RIM	191025	191025_135_LC1363	LC1363	30	5	3.5	0.217	0.017	0.02716	0.00072	0.16721	0.0587	0.0047	198	15	172.8	4.5	500	190	3.32	153000	79	<380	4.7	0.149	<9.7	307.8	460000	0.57		1.21	0.08	17.11	0.045	0.74	1.18	0.6	6.01	1.84	21	8.97	48.4	11.83	119.5	30.08	10450	0.258
YM43	CORE	YM43 CORE	191025	191025_136_LC1364	LC1364	30	5	3.5
YM43	RIM	YM43 RIM	191025	191025_137_LC1365	LC1365	30	5	3.5
YM43	CORE	YM43 CORE	191025	191025_138_LC1366	LC1366	30	5	3.5	0.18	0.013	0.02669	0.00084	0.45332	0.0504	0.0039	172	13	169.8	5.3	180	160	11.9	153000	124	<420	4.34	0.52	<11	786	455000	1.11		0.12	0.12	34	0.155	2.32	4.4	1.46	20.3	5.79	67.1	24.9	124	26.83	261.8	56.3	10430	0.377
YM43	RIM	YM43 RIM	191025	191025_140_LC1367	LC1367	30	5	3.5	0.206	0.02	0.02794	0.00088	0.30227	0.0546	0.005	189	17	177.6	5.5	340	190	1.25	153000	67.6	<390	3.6	0.44	<9.8	334.1	483000	0.599		0.065	0.054	18.68	0.096	1.08	1.67	0.553	6.87	2.09	24.9	10.19	54	12.81	131.8	31.7	11050	0.192
YM43	RIM	YM43 RIM	191025	191025_141_LC1368	LC1368	30	5	3.5	0.19	0.012	0.02734	0.00052	0.17752	0.0503	0.0034	176	10	173.9	3.3	170	140	<0.57	153000	70	<360	3.77	0.122	<9.5	332.4	455200	0.59		<0.1	0.0071	21.19	0.0253	0.46	1.52	0.489	6.49	2.18	24.86	9.8	50.8	11.96	122.8	29.03	10820	0.141
YM43	CORE	YM43 CORE	191025	191025_142_LC1369	LC1369	30	5	3.5	0.249	0.033	0.02776	0.00093	0.45059	0.0665	0.008	223	27	176.5	5.8	710	270	27	153000	46	<530	3.63	0.2	<14	481	470000	0.428		0.28	0.04	15.76	0.122	2.41	3.08	1.27	13.3	3.69	40.7	14.99	75.7	16.75	171	38.4	10660	0.119
YM43	RIM	YM43 RIM	191025	191025_143_LC1370	LC1370	30	5	3.5	0.216	0.026	0.02681	0.00074	0.08617	0.0589	0.0076	196	21	170.6	4.7	430	240	214	153000	59	<410	5.6	0.82	200	409	452800	0.609		4.2	0.103	18.3	0.112	1.25	2.21	0.83	9.3	2.68	30.9	12.3	63.2	14.9	153	36.7	10870	0.156
YM42	CORE	YM42 CORE	191025	191025_145_LC1371	LC1371	30	5	3.5	0.188	0.018	0.02708	0.00075	0.056489	0.0495	0.0049	174	15	172.2	4.7	120	200	<0.75	153000	281	<490	7.6	0.27	<12	582.2	441700	1.08		<0.12	0.8	22.5	0.27	2.02	2.49	0.69	12.36	3.84	47.5	18.29	94.3	20.93	207.6	46.2	10240	0.433
YM42	RIM	YM42 RIM	191025	191025_146_LC1372	LC1372	30	5	3.5	0.164	0.018	0.02598	0.0006	0.032042	0.0451	0.0049	154	15	165.3	3.7	-10	220	<0.8	153000	59	<510	3.72	<0.14	<13	238.8	457100	0.374		<0.15	<0.0077	16.2	0.0302	0.33	0.95	0.382	4.83	1.51	17.27	6.96	37	8.87	93.5	23.43	11000	0.163
YM42	CORE	YM42 CORE	191025	191025_147_LC1373	LC1373	30	5	3.5	0.37	0.059	0.0376	0.0029	0.90309	0.068	0.0063	318	43	238	18	740	200	82	153000	385	<490	46	1.96	920	1627	443500	3.44		1.94	0.85	23.7	0.7	5.3	6.9	0.79	37.2	12.02	148.9	56.1	265	54.1	478	100.6	9900	0.774
YM42	RIM	YM42 RIM	191025	191025_148_LC1374	LC1374	30	5	3.5	0.183	0.013	0.02823	0.00086	0.098909	0.0486	0.0044	170	11	179.4	5.4	90	180	<0.79	153000	45	<490	3.4	0.166	<13	336.5	448800	0.635		<0.099	<0.0089	23.74	0.039	0.71	1.62	0.525	8.02	2.23	26.37	10.11	53.6	12.57	123.9	29.01	10800	0.166
YM42	CORE	YM42 CORE	191025	191025_155_LC1375	LC1375	30	5	3.5	0.184	0.014	0.02777	0.0006	0.092318	0.0476	0.0037	170	12	176.6	3.8	60	160	<0.55	153000	125	<350	4.18	0.401	<9	566	443200	0.643		<0.023	0.006	18.56	0.07	1.31	2.77	0.84	13.56	3.96	46.7	17.4	88.7	19.79	197.8	45	10830	0.225
YM42	RIM	YM42 RIM	191025	191025_156_LC1376	LC1376	30	5	3.5	0.2	0.011	0.02741	0.00049	0.057088	0.0523	0.0031	184.4	9.2	174.3	3.1	260	120	<0.57	153000	64.4	<340	2.91	0.112	<8.7	378	447300	0.605		<0.023	0.0034	17.26	0.0263	0.67	1.39	0.594	6.9	2.2	27.3	11.07	60.2	14.42	154.8	38.1	10440	0.193
AM22	CORE	AM22 CORE	191025	191025_157_LC1377	LC1377	30	5	3.5
AM22	RIM	AM22 RIM	191025	191025_158_LC1378	LC1378	30	5	3.5
AM22	CORE	AM22 CORE	191025	191025_160_LC1379	LC1379	30	5	3.5	0.232	0.028	0.02732	0.0007	0.12304	0.0613	0.0077	209	23	173.7	4.4	500	250	3.44	153000	54	<400	4.43	0.132	17.7	421	442000	0.302		0.34	0.134	14.54	0.102	1.34	3.01	1.04	10.79	3.17	34.6	12.45	66	15.14	157.3	35.2	10270	0.121
AM22	RIM	AM22 RIM	191025	191025_161_LC1380	LC1380	30	5	3.5	0.208	0.014	0.02765	0.00066	0.12906	0.0543	0.0041	194	13	175.8	4.1	350	170	<0.58	153000	71	<370	3.34	<0.096	<8.4	308.3	438600	0.52		<0.098	0.16	15.06	0.054	0.6	1.14	0.412	5.13	1.67	21.02	8.88	49.7	12.65	135.9	34.2	10590	0.153
AM22	CORE	AM22 CORE	191025	191025_162_LC1381	LC1381	30	5	3.5	0.212	0.011	0.02628	0.00038	0.0027215	0.0595	0.0033	194.8	9.6	167.2	2.4	560	110	3830	153000	165	4030	16.7	11.8	1315	1305	460000	1.96		0.88	0.278	53.8	0.232	3.9	8.29	1.78	39.3	11.03	122.6	43.6	206	42.9	394	80.4	11130	0.633
AM22	RIM	AM22 RIM	191025	191025_163_LC1382	LC1382	30	5	3.5	0.199	0.015	0.02728	0.00049	0.10995	0.0525	0.004	183	13	173.5	3.1	250	160	<0.61	153000	111	<390	5.24	0.191	<10	403.9	447000	0.729		<0.11	<0.0067	21.94	0.0311	0.84	1.84	0.518	9.32	2.7	33	12.82	63.3	14.03	140.5	30.31	10900	0.289
AM22	CORE	AM22 CORE	191025	191025_165_LC1383	LC1383	30	5	3.5	0.256	0.017	0.0327	0.00079	0.34263	0.0556	0.0032	231	13	207.4	5	410	130	143	153000	303	<400	6.3	0.31	30	977	464000	1.27		3.7	0.353	11.97	0.093	1.07	2.28	0.77	15.2	5.23	72.8	31.2	166.5	38.6	391	88.8	10270	0.496
AM22	RIM	AM22 RIM	191025	191025_166_LC1384	LC1384	30	5	3.5	0.208	0.023	0.02541	0.00081	0.36755	0.0597	0.0071	191	19	161.7	5.1	580	290	31.3	153000	80	<460	2.85	0.31	55	261.4	473000	0.357		0.21	0.069	11.5	0.086	0.57	0.88	0.366	3.42	1.21	16.98	7.1	41.1	10.67	117.7	30.7	11520	0.128
AM22	CORE	AM22 CORE	191025	191025_167_LC1385	LC1385	30	5	3.5	0.24	0.033	0.0263	0.0011	0.20829	0.066	0.01	216	26	167.6	6.7	670	300	3.56	153000	164	<480	7.05	0.173	13.5	672	441000	0.97		0.28	0.254	22.5	0.136	1.67	3.24	1.08	16	5	56.9	21.7	107.8	24	231	49	9610	0.368
AM22	RIM	AM22 RIM	191025	191025_168_LC1386	LC1386	30	5	3.5	0.204	0.015	0.0269	0.00049	0.057169	0.055	0.0041	188	12	171.1	3.1	340	160	11.7	153000	59	<340	4.2	0.131	10.9	339	447000	0.57		0.46	0.086	18.32	0.0373	0.61	1.34	0.455	6.38	2.02	24.5	10.16	55.2	13.44	139.7	32.3	10440	0.261
AM22	CORE	AM22 CORE	191025	191025_170_LC1387	LC1387	30	5	3.5	0.187	0.016	0.02573	0.00073	0.27471	0.0514	0.0041	173	14	163.7	4.6	230	170	<0.54	153000	84	<340	5.54	0.21	<8.6	658	448000	0.51		<0.1	0.0133	19.7	0.136	2.77	4.86	1.42	18.9	5.2	57.5	20.6	102	21.6	209	43.7	10330	0.182
AM22	RIM	AM22 RIM	191025	191025_171_LC1388	LC1388	30	5	3.5	0.185	0.0097	0.02649	0.00064	0.060252	0.0501	0.0027	172	8.3	168.5	4	200	120	<0.54	153000	78	<340	3.77	0.183	<9.1	690	458000	0.826		<0.063	0.0051	26	0.107	2.05	3.81	1.19	17.1	5	58.2	21.3	105.3	23.8	235	50.9	10260	0.234
AM22	CORE	AM22 CORE	191025	191025_172_LC1389	LC1389	30	5	3.5	0.173	0.013	0.02648	0.00053	0.1562	0.047	0.0034	161	11	168.4	3.4	30	150	0.69	153000	44	<380	2.86	<0.11	<9.1	467	461000	0.338		<0.096	0.0104	15.4	0.132	2.02	3.52	1.31	12.9	3.38	36.3	14.1	71.3	17	175	43.1	11060	0.088
AM22	RIM	AM22 RIM	191025	191025_173_LC1390	LC1390	30	5	3.5	0.197	0.018	0.02582	0.00069	0.047852	0.0566	0.0054	181	15	164.3	4.3	370	200	10.1	153000	68	<390	4.6	1.24	13.4	157.1	452000	0.311		0.38	0.049	7.8	0.0227	0.17	0.41	0.205	2.4	0.779	9.97	4.06	24.9	6.76	80	22.07	11770	0.073
AM22	CORE	AM22 CORE	191025	191025_175_LC1391	LC1391	30	5	3.5	0.258	0.019	0.03138	0.00092	0.32221	0.0595	0.0041	232	16	199.2	5.7	540	160	25	153000	96	<410	4.23	0.47	<10	530	454000	0.89		0.18	0.025	30.6	0.079	1.15	2.28	0.862	11.1	3.27	39.8	15.61	84.1	20.1	202	47.1	10400	0.224
AM22	RIM	AM22 RIM	191025	191025_176_LC1392	LC1392	30	5	3.5	0.198	0.016	0.02607	0.00082	0.12714	0.0569	0.0049	183	14	165.9	5.2	440	190	24.4	153000	53	<500	3.19	0.32	128	243.7	495900	0.44		2.09	0.037	14.32	0.035	0.61	0.72	0.431	4.04	1.33	16.4	6.62	40.7	9.66	107.6	27.99	11700	0.112
AM22	CORE	AM22 CORE	191025	191025_177_LC1393	LC1393	30	5	3.5	0.178	0.02	0.02754	0.00068	0.078769	0.0471	0.0053	165	17	175.1	4.3	10	210	6.1	153000	375	<400	6.14	0.232	<11	442	460800	0.533		<0.079	0.17	14.6	0.134	1.58	2.27	0.86	10.37	3.02	35.3	13.33	68.3	15.4	159.9	36.9	10700	0.197
AM22	RIM	AM22 RIM	191025	191025_178_LC1394	LC1394	30	5	3.5	0.1777	0.0098	0.0273	0.00047	0.060373	0.0475	0.0028	165.7	8.4	173.6	2.9	60	120	<0.66	153000	65	<390	3.55	<0.1	<10	260.7	453000	0.487		<0.027	<0.0039	20.39	0.033	0.56	1.05	0.541	5.82	1.62	18.95	7.54	39.9	9.68	104.9	26.85	10810	0.12
AM22	CORE	AM22 CORE	191025	191025_185_LC1395	LC1395	30	5	3.5	0.2	0.014	0.02695	0.00093	0.26689	0.0539	0.0038	185	12	171.4	5.8	330	150	2.7	153000	73	<410	6.09	0.313	<11	849	458000	0.742		0.31	0.178	26.93	0.21	3.18	5.35	1.9	23.2	6.63	72.8	26.62	134.1	29.23	284	63.3	10400	0.244
AM22	RIM	AM22 RIM	191025	191025_186_LC1396	LC1396	30	5	3.5	0.205	0.017	0.02658	0.00066	0.011325	0.0567	0.0049	192	16	169.1	4.2	430	200	2.05	153000	59	<340	3.56	0.201	10.2	291.3	457000	0.531		<0.085	0.0183	17.39	0.046	0.77	1.27	0.539	6.28	1.827	22	8.69	46.8	10.67	114.7	26.77	10770	0.177
AM22	CORE	AM22 CORE	191025	191025_187_LC1397	LC1397	30	5	3.5	0.198	0.018	0.02787	0.00068	0.11743	0.0523	0.0048	182	15	177.2	4.3	230	190	1.92	153000	121	<390	4.65	0.35	<11	585	443200	0.507		<0.093	0.0206	17.67	0.089	1.71	3.46	1.07	15.45	4.53	50.8	18.38	91	19.93	187	40.1	10390	0.193
AM22	RIM	AM22 RIM	191025	191025_188_LC1398	LC1398	30	5	3.5	0.183	0.02	0.02743	0.00081	0.27469	0.0496	0.0052	170	17	174.5	5.1	140	220	0.8	153000	36	<440	3.15	<0.13	<10	189.5	463000	0.334		<0.048	<0.0081	10.61	0.0101	0.28	0.66	0.315	3.45	0.993	12.9	5.57	31.1	7.72	86.5	22	10770	0.089
AM22	CORE	AM22 CORE	191025	191025_190_LC1399	LC1399	30	5	3.5	0.2	0.012	0.02621	0.0007	0.12651	0.0561	0.0036	184.5	9.9	166.7	4.4	390	130	2.12	153000	53.3	<320	3.93	0.09	8.3	456	459200	0.422		0.141	0.081	17.11	0.159	1.99	2.88	1.23	10.84	2.88	33.6	13.11	69.6	17.29	199	51.1	10400	0.12
AM22	RIM	AM22 RIM	191025	191025_191_LC1400	LC1400	30	5	3.5	0.232	0.021	0.02747	0.00091	0.45899	0.0624	0.0049	211	18	174.7	5.7	640	180	1.89	153000	60	<360	5.5	<0.11	<9.4	546	445000	0.934		0.26	0.045	27.7	0.063	1.14	2.04	0.92	11.06	3.36	40.4	16.53	90.4	22.16	244	56.1	10100	0.24
AC25	CORE	AC25 CORE	191025	191025_192_LC1401	LC1401	30	5	3.5	0.198	0.011	0.02714	0.00041	0.17149	0.0532	0.0033	183.1	9.6	172.6	2.6	290	130	76	153000	92	<440	4.72	0.181	<11	643	443800	1.23		0.64	0.047	33.8	0.073	1.35	2.65	0.92	13.93	4.08	49.1	19.58	102.9	23.22	228.8	52.1	9950	0.326
AC25	RIM	AC25 RIM	191025	191025_193_LC1402	LC1402	30	5	3.5	0.183	0.014	0.02657	0.00061	0.094965	0.0508	0.0039	170	12	169	3.8	190	160	<0.7	153000	79	<410	3.38	0.149	<11	493.4	466000	0.663		<0.17	0.0119	24.03	0.092	0.97	2.71	0.9	10.21	3.11	38.5	14.44	77.2	17.69	182.1	43.5	10620	0.191
AC25	CORE	AC25 CORE	191025	191025_195_LC1403	LC1403	30	5	3.5	0.198	0.025	0.028	0.0011	0.0051074	0.0531	0.0066	182	21	177.9	6.7	240	250	<0.77	153000	151	<440	5.13	0.144	<12	407.5	463800	0.668		<0.04	<0.0072	15.38	0.03	0.7	1.57	0.46	8.05	2.56	31.2	12.52	64.8	14.95	151.2	34.1	11400	0.234
AC25	RIM	AC25 RIM	191025	191025_196_LC1404	LC1404	30	5	3.5	0.203	0.023	0.02754	0.00097	0.1889	0.0533	0.0068	186	19	175.1	6.1	250	240	<0.81	153000	49	<440	3.14	0.135	<11	212.5	433000	0.259		<0.17	<0.0096	14.45	0.0194	0.4	0.99	0.42	4.82	1.26	15.93	6.28	32.7	7.93	84.7	20.86	10380	0.084
AC25	CORE	AC25 CORE	191025	191025_197_LC1405	LC1405	30	5	3.5	0.214	0.018	0.02815	0.00069	0.13381	0.0551	0.0044	196	15	179	4.3	360	170	12.3	153000	187	<400	2.96	0.49	<9.8	672	445200	0.596		<0.081	0.208	24.9	0.218	2.92	4.74	1.67	19.8	5.11	59.1	21	104.1	22.8	227	52.5	10210	0.19
AC25	RIM	AC25 RIM	191025	191025_198_LC1406	LC1406	30	5	3.5	0.305	0.049	0.02828	0.00076	0.21546	0.082	0.013	264	36	179.7	4.8	990	280	20.2	153000	46	<420	12.2	0.32	280	224.5	458000	0.329		0.61	0.047	15.98	0.044	0.56	1.17	0.425	5.02	1.43	16.1	6.38	34	8.21	88.1	22.31	10980	0.11
AC25	CORE	AC25 CORE	191025	191025_200_LC1407	LC1407	30	5	3.5	0.197	0.02	0.02784	0.00068	0.34275	0.0497	0.0043	181	16	177	4.2	170	180	75	153000	55	<350	4.08	0.222	<8.8	344.2	449000	0.562		0.28	0.09	17.41	0.044	0.78	1.71	0.616	7.6	2.17	26.61	10.23	54.3	12.66	131.8	31.03	10590	0.178
AC25	RIM	AC25 RIM	191025	191025_201_LC1408	LC1408	30	5	3.5	0.189	0.025	0.0266	0.001	0.066913	0.0506	0.0072	175	22	169.4	6.3	170	300	39	153000	39	<590	5.5	<0.16	<15	200.8	420000	0.42		<0.16	0.097	11.02	0.04	0.19	0.52	0.33	3.17	1.05	14	5.63	31.9	8.15	86.4	22.44	9980	0.132
AC25	CORE	AC25 CORE	191025	191025_202_LC1409	LC1409	30	5	3.5	0.203	0.019	0.02697	0.00078	0.082136	0.0541	0.0054	187	16	171.5	4.9	310	220	48	153000	140	<410	5.9	0.4	47	815	436700	1.19		0.9	0.0136	35.5	0.132	2.24	4.62	1.39	18.7	5.46	64.2	24.71	124.4	27.7	274.1	60.9	9220	0.275
AC25	RIM	AC25 RIM	191025	191025_203_LC1410	LC1410	30	5	3.5	0.196	0.027	0.02672	0.00078	0.051617	0.0524	0.0075	180	22	170	4.9	200	270	179	153000	105	<470	7.6	0.205	12.7	888	438000	1.37		5.8	0.062	44.4	0.081	1.68	3.34	1.57	19.7	5.59	72.5	28.1	139.4	30.7	291	63.6	8680	0.276
AC25	CORE	AC25 CORE	191025	191025_205_LC1411	LC1411	30	5	3.5	0.189	0.014	0.02666	0.00049	0.16891	0.0506	0.0036	175	12	169.6	3.1	210	160	2.1	153000	181	<350	6.51	0.381	<9.4	622	450300	0.962		<0.024	0.34	24.25	0.149	1.33	2.83	0.816	14.44	4.4	50.7	19.72	96.4	20.98	202.2	44.1	10280	0.303
AC25	RIM	AC25 RIM	191025	191025_206_LC1412	LC1412	30	5	3.5	0.167	0.018	0.02714	0.00077	0.37636	0.0452	0.0047	156	16	172.6	4.8	-40	210	<0.77	153000	88	<460	4.3	0.236	<12	291.4	464000	0.525		<0.05	0.013	17.06	0.026	0.78	1.34	0.511	5.83	1.85	23.06	8.49	46.6	10.63	106.3	24.55	11030	0.186
AC25	CORE	AC25 CORE	191025	191025_207_LC1413	LC1413	30	5	3.5	0.18	0.02	0.02683	0.00088	0.11295	0.0481	0.0056	167	17	170.6	5.6	60	230	16	153000	92	<540	4.5	0.18	<13	424.3	451000	0.67		<0.11	0.024	19.07	0.056	1.01	1.73	0.65	9.49	2.83	32.6	12.6	68.6	15.32	154.9	36.26	10850	0.215
AC25	RIM	AC25 RIM	191025	191025_208_LC1414	LC1414	30	5	3.5	0.186	0.012	0.02721	0.0005	0.039964	0.049	0.0031	173	10	173.1	3.2	150	140	<0.64	153000	57	<410	3.39	<0.11	<9.7	351	447400	0.529		<0.094	<0.0064	18.12	0.0303	0.53	0.89	0.608	6.02	1.82	23.75	9.97	56.4	13.82	150.8	38.63	10190	0.129
AC25	CORE	AC25 CORE	191025	191025_215_LC1415	LC1415	30	5	3.5	0.199	0.015	0.02843	0.00059	0.019339	0.0506	0.0041	183	13	180.7	3.7	170	160	<0.58	153000	134.5	<360	5.58	0.165	<9.8	706	441400	0.747		<0.069	0.0102	20.99	0.124	2.17	3.98	1.28	18.15	5.24	60.1	22.31	109.2	24.2	229.5	50.3	9800	0.226
AC25	RIM	AC25 RIM	191025	191025_216_LC1416	LC1416	30	5	3.5	0.178	0.012	0.02709	0.00047	0.30625	0.0481	0.0033	168	11	172.3	3	80	140	<0.6	153000	93	<360	4.04	<0.097	<9.1	409.9	437000	0.671		<0.087	<0.0065	25.28	0.042	1.1	2.16	0.699	8.92	2.85	34.2	12.68	62.8	13.64	136.1	30.55	10240	0.218
AC25	CORE	AC25 CORE	191025	191025_217_LC1417	LC1417	30	5	3.5
AC25	RIM	AC25 RIM	191025	191025_218_LC1418	LC1418	30	5	3.5	0.178	0.02	0.0267	0.001	0.0096859	0.0505	0.0066	166	17	170.1	6.6	170	250	670	153000	38	<670	5.2	<0.18	27	361	428000	1.06		0.5	0.26	28.4	0.11	1.32	2.38	0.59	9.1	2.54	27.5	10.3	54.3	12.8	132	29.9	10100	0.231
AC25	RIM	AC25 RIM	191025	191025_220_LC1419	LC1419	30	5	3.5	0.216	0.018	0.02824	0.00077	0.29426	0.0553	0.0052	202	17	179.5	4.9	390	210	203	153000	98	<450	9.2	0.65	153	432.7	443400	0.746		2.18	0.042	22.15	0.053	0.75	1.72	0.63	9.21	2.85	34.2	13.26	68.5	15.76	153.1	34.32	10810	0.442
AC25	CORE	AC25 CORE	191025	191025_221_LC1420	LC1420	30	5	3.5	0.188	0.016	0.02638	0.00049	0.076731	0.0517	0.0043	174	13	167.8	3.1	210	170	1.32	153000	200	<370	7.69	0.318	<9.2	656.4	446600	1.136		<0.025	0.0069	24.14	0.074	1.49	2.94	0.9	14.79	4.47	54.1	20.34	102.1	22.63	217.3	46.9	9720	0.357
AC25	RIM	AC25 RIM	191025	191025_222_LC1421	LC1421	30	5	3.5	0.191	0.013	0.02703	0.00043	0.0066263	0.0511	0.0035	177	11	171.9	2.7	210	150	117	153000	131	<360	24	0.71	237	676	438300	1.59		1.21	0.043	31.57	0.072	1.1	2.51	0.79	13.9	4.18	52	20.73	108.2	24.51	238.6	53.8	10920	0.488
AC25	CORE	AC25 CORE	191025	191025_223_LC1422	LC1422	30	5	3.5	0.199	0.018	0.02765	0.00069	0.093006	0.0532	0.0048	184	15	175.8	4.3	280	190	3.8	153000	197	<430	7.5	0.44	<11	980	464000	1.27		<0.16	0.042	32	0.161	2.48	5.1	1.49	24.5	7.09	84.9	31.1	153	32.7	310	66.7	10170	0.4
AC25	RIM	AC25 RIM	191025	191025_225_LC1423	LC1423	30	5	3.5	0.203	0.012	0.0277	0.00043	0.15597	0.0531	0.003	186.8	9.9	176.1	2.7	300	120	15.9	153000	79	<370	7.7	0.35	77	522	433300	0.955		0.53	0.077	31	0.072	1.26	2.32	1.06	11.49	3.22	39.4	15.7	79.8	18.4	191.2	46.9	10070	0.26
AC25	CORE	AC25 CORE	191025	191025_226_LC1424	LC1424	30	5	3.5	0.204	0.019	0.02889	0.00074	0.25835	0.0511	0.0045	187	16	183.6	4.6	200	190	<0.65	153000	112	<360	6.45	0.186	<9.1	564	449200	0.577		<0.094	0.0182	15.07	0.103	2.06	3.4	1.108	15.13	4.23	49.1	17.87	87.5	19.08	183	39.3	9780	0.189
AC25	RIM	AC25 RIM	191025	191025_227_LC1425	LC1425	30	5	3.5	0.179	0.016	0.02756	0.00067	0.32264	0.047	0.0041	166	14	175.3	4.2	30	170	14.6	153000	38	<350	3.39	<0.093	<8.9	217.1	443200	0.394		0.22	0.014	12.21	0.0241	0.45	0.72	0.328	4.2	1.158	14.75	6.2	33.4	8.33	92.3	23.93	10540	0.101
AC25	RIM	AC25 RIM	191025	191025_228_LC1426	LC1426	30	5	3.5	0.244	0.026	0.0284	0.001	0.13702	0.0622	0.0068	221	21	180.5	6.6	590	240	1.59	153000	83	<470	5.1	<0.13	<12	477	422000	0.67		<0.13	0.008	17.71	0.049	1.14	1.82	0.65	8.86	2.81	34.6	14.27	74.3	16.88	176.5	42.5	9610	0.208
AC25	RIM	AC25 RIM	191025	191025_230_LC1427	LC1427	30	5	3.5	0.18	0.012	0.02623	0.00051	0.28073	0.0497	0.0032	167	11	166.9	3.2	150	130	<0.53	153000	86.2	<350	4.38	0.228	<8	587.4	444700	1.039		<0.023	<0.0034	32.35	0.064	0.88	2.29	0.93	11.41	3.7	45.6	17.83	92.6	21.14	215.2	49.4	9910	0.257
AC25	CORE	AC25 CORE	191025	191025_231_LC1428	LC1428	30	5	3.5	0.186	0.018	0.02665	0.0009	0.17151	0.0524	0.0058	173	15	169.5	5.6	230	220	537	153000	90	<500	9.7	0.36	42	923	457000	0.8		3.79	0.245	32.3	0.285	3.85	6.46	2.2	24.5	6.71	78.7	29.46	144.5	31.6	315	71.5	10760	0.267
AC25	RIM	AC25 RIM	191025	191025_232_LC1429	LC1429	30	5	3.5
AC25	CORE	AC25 CORE	191025	191025_233_LC1430	LC1430	30	5	3.5	0.19	0.017	0.02729	0.00069	0.07846	0.0509	0.0049	175	15	173.5	4.3	170	200	30	153000	49	<430	2.93	<0.12	<11	480	435400	0.411		0.122	0.035	15.41	0.11	1.9	2.73	1.21	12.38	3.34	38.6	14.54	74.6	17.02	174.7	42.7	10300	0.104
AC25	RIM	AC25 RIM	191025	191025_235_LC1431	LC1431	30	5	3.5	0.191	0.016	0.02768	0.00066	0.10628	0.0504	0.0048	176	14	176	4.2	150	180	<0.61	153000	68	<360	3.41	0.152	<11	398.7	439900	0.644		<0.079	<0.0059	22.15	0.04	0.66	1.35	0.61	7.76	2.26	28	11.95	63.1	15.03	157.4	38.62	10090	0.18
AC25	CORE	AC25 CORE	191025	191025_236_LC1432	LC1432	30	5	3.5	0.201	0.018	0.03025	0.00061	0.060602	0.0494	0.0049	189	16	192.1	3.8	100	180	<0.66	153000	136	<420	6.09	0.275	<11	758	439400	1.26		<0.13	<0.0054	28	0.078	1.65	3.74	0.96	18.7	5.58	62.1	23.9	119.9	25.9	247	53.8	10280	0.385
AC25	RIM	AC25 RIM	191025	191025_237_LC1433	LC1433	30	5	3.5	0.181	0.017	0.02865	0.00069	0.12731	0.0468	0.0047	171	15	182.1	4.3	0	190	<0.69	153000	57	<420	3.31	<0.12	<11	200.1	436800	0.392		<0.12	<0.0063	12.71	0.0171	0.28	0.8	0.274	3.99	1.127	14.7	5.96	30.57	7.47	77.9	18.92	10280	0.089
AC25	RIM	AC25 RIM	191025	191025_238_LC1434	LC1434	30	5	3.5
AC25	CORE	AC25 CORE	191025	191025_245_LC1435	LC1435	30	5	3.5	0.21	0.025	0.02791	0.00078	0.34252	0.0531	0.0058	191	21	177.4	4.9	230	220	1.92	153000	112	<420	4.89	0.126	<9.9	649	434100	0.775		<0.1	0.169	27.04	0.12	1.63	3.16	1.42	14.74	4.46	51.3	19.83	100.9	22.17	216	48.5	8540	0.192
AC25	RIM	AC25 RIM	191025	191025_246_LC1436	LC1436	30	5	3.5	0.197	0.015	0.0277	0.00058	0.042336	0.0507	0.0041	182	13	176.1	3.6	170	170	0.85	153000	144	<420	5.5	0.193	<11	580	441800	1.035		<0.13	0.13	38.01	0.153	1.5	3.22	1.2	14.51	4	47.8	17.66	86	18.83	175.2	38.1	9200	0.226
AC25	CORE	AC25 CORE	191025	191025_247_LC1437	LC1437	30	5	3.5	0.206	0.025	0.0277	0.001	0.20693	0.0527	0.007	189	21	175.9	6.4	250	290	24.7	153000	66	<630	3.7	1.34	<16	348.6	433000	0.48		0.38	0.065	21.7	0.043	0.93	1.27	0.68	6.89	2.03	23.7	9.77	55.4	13.3	142.9	35.9	10000	0.099
AC25	RIM	AC25 RIM	191025	191025_248_LC1438	LC1438	30	5	3.5	0.204	0.015	0.02662	0.00058	0.083218	0.0543	0.0041	188	12	169.4	3.7	320	160	354	153000	44	<460	3.54	1.98	12.4	182.6	436300	0.335		8.6	0.0077	13.48	0.0201	0.2	0.63	0.315	3.21	0.928	12.08	4.88	28	7.01	80.3	21.79	10670	0.097
AC25	RIM	AC25 RIM	191025	191025_250_LC1439	LC1439	30	5	3.5	0.195	0.013	0.02808	0.00045	0.14579	0.0491	0.0032	181	11	178.5	2.8	130	140	7.5	153000	75	<350	3.92	0.094	<8.8	347.5	434200	0.583		0.037	<0.0072	22.05	0.0377	0.77	1.2	0.66	6.93	2.13	25.8	10.15	53.2	12.59	134.5	32.12	9950	0.136
AC25	CORE	AC25 CORE	191025	191025_251_LC1440	LC1440	30	5	3.5	0.186	0.025	0.02826	0.00081	0.061746	0.0463	0.0065	171	22	179.6	5.1	-30	260	<0.67	153000	63	<410	3.32	<0.12	<11	421	434600	0.5		<0.041	0.0067	15.5	0.09	1.15	2.12	0.95	9	2.66	31.6	12.6	66.8	15.6	168	39.7	10070	0.125
AC25	RIM	AC25 RIM	191025	191025_252_LC1441	LC1441	30	5	3.5	0.202	0.014	0.02811	0.00035	0.16232	0.0511	0.0035	186	12	178.7	2.2	200	150	<0.59	153000	60	<340	3.2	<0.092	<9	260.3	431500	0.412		<0.084	<0.0067	17.75	0.024	0.42	1.17	0.444	5.12	1.501	18.35	7.33	40.8	9.98	106.4	27.34	10170	0.126
AC25	RIM	AC25 RIM	191025	191025_253_LC1442	LC1442	30	5	3.5	0.207	0.018	0.0268	0.00063	0.30539	0.0544	0.0045	190	15	170.4	4	310	170	5.7	153000	39	<330	4.1	0.34	160	316.1	445000	0.391		0.28	0.02	13.5	0.072	0.99	1.64	0.755	7.15	1.98	22.57	9.13	48.9	11.82	125.1	31.99	10480	0.118
AC25	CORE	AC25 CORE	191025	191025_255_LC1443	LC1443	30	5	3.5	0.183	0.015	0.02768	0.00092	0.33475	0.0464	0.0044	170	13	176	5.7	10	190	3.6	153000	169	<550	6.9	1.17	<13	1240	436000	0.92		0.74	0.161	34.6	0.276	4.55	8.39	2.51	39	10.84	119.4	41.4	192	38.7	365	72.9	9800	0.343
AC25	RIM	AC25 RIM	191025	191025_256_LC1444	LC1444	30	5	3.5	0.202	0.015	0.02775	0.00058	0.26938	0.0514	0.0037	186	13	176.4	3.6	210	150	69	153000	87	<350	5.74	0.272	11.3	516	437300	0.938		0.3	0.172	25.03	0.096	0.99	2.08	0.628	11.35	3.36	40.6	15.92	82	18.42	186.5	43.1	10450	0.262
AC25	CORE	AC25 CORE	191025	191025_257_LC1445	LC1445	30	5	3.5	0.1934	0.0075	0.02721	0.00035	0.24921	0.0502	0.0018	179.3	6.4	173.1	2.2	188	80	<0.6	153000	254	<370	9.9	0.66	10.6	1751	447400	3.72		<0.073	0.0043	87.7	0.193	3.57	7.68	2.45	38.5	12.3	146.4	54.6	271.4	57.9	538	112.4	9620	0.841
AC25	RIM	AC25 RIM	191025	191025_258_LC1446	LC1446	30	5	3.5	0.195	0.022	0.02848	0.00071	0.23715	0.0485	0.0055	179	19	181	4.5	60	210	<0.62	153000	60	<400	2.73	<0.11	<11	220	446200	0.364		<0.13	<0.0061	14.2	0.0258	0.55	0.85	0.343	4.23	1.195	15.3	6.3	35.1	8.35	89.6	23.08	10490	0.102
AC25	CORE	AC25 CORE	191025	191025_260_LC1447	LC1447	30	5	3.5
AC25	RIM	AC25 RIM	191025	191025_261_LC1448	LC1448	30	5	3.5	0.191	0.015	0.02812	0.00069	0.069426	0.0498	0.0039	177	13	178.7	4.3	150	160	0.63	153000	94	<340	3.16	<0.094	<8.3	797	455000	0.667		<0.067	0.0206	20.5	0.155	2.51	4.13	2.04	19.4	5.88	67.9	24.6	115	25.5	244	55.3	10420	0.198
AC25	CORE	AC25 CORE	191025	191025_262_LC1449	LC1449	30	5	3.5
AC25	RIM	AC25 RIM	191025	191025_263_LC1450	LC1450	30	5	3.5	0.196	0.027	0.02771	0.00093	0.0093008	0.0503	0.0073	181	23	176.2	5.8	150	300	6.5	153000	55	<510	2.95	<0.14	<13	226.5	428000	0.321		<0.13	0.0126	13.91	0.0183	0.31	0.88	0.34	4.27	1.41	15.5	6.78	35.2	8.51	92	23.2	10070	0.112
AC25	CORE	AC25 CORE	191025	191025_265_LC1451	LC1451	30	5	3.5	0.403	0.031	0.02895	0.00063	0.12642	0.0982	0.0072	341	22	183.9	3.9	1540	150	265	153000	100	<350	42	0.65	231	530	437000	0.719		9.7	0.68	17.38	0.188	1.97	3.1	0.93	12.26	3.54	41.5	16.18	83.9	18.71	187.5	42.8	9620	1.13
AC25	RIM	AC25 RIM	191025	191025_266_LC1452	LC1452	30	5	3.5	0.185	0.014	0.02715	0.00052	0.20984	0.0487	0.0036	172	12	172.7	3.2	110	150	0.98	153000	78	<360	2.95	0.142	<9.4	250.8	434700	0.444		<0.11	0.18	15.53	0.056	0.66	0.81	0.494	4.53	1.447	17.68	7.14	39.4	9.4	101.8	26.02	10220	0.095
AC25	CORE	AC25 CORE	191025	191025_267_LC1453	LC1453	30	5	3.5
AC25	RIM	AC25 RIM	191025	191025_268_LC1454	LC1454	30	5	3.5
AC25	CORE	AC25 CORE	191025	191025_275_LC1455	LC1455	30	5	3.5	0.182	0.013	0.02705	0.00044	0.19781	0.0489	0.0034	169	11	172	2.8	130	150	<0.79	153000	292	<420	9.8	1.36	<12	2880	429400	2.69		<0.1	0.06	86.3	0.639	11.7	23.1	5.26	96.2	26.7	285	93.5	416	82.8	714	139.7	8760	0.68
AC25	RIM	AC25 RIM	191025	191025_276_LC1456	LC1456	30	5	3.5	0.203	0.016	0.02778	0.00057	0.049507	0.0548	0.0044	186	13	176.6	3.6	340	170	<0.6	153000	62	<370	3.06	<0.1	<9.7	291.8	449100	0.519		<0.14	<0.0064	15.32	0.0196	0.35	1.33	0.41	5.44	1.79	21.1	8.92	47.6	11.19	116.8	27.79	10540	0.152
AC25	CORE	AC25 CORE	191025	191025_277_LC1457	LC1457	30	5	3.5	0.195	0.011	0.02853	0.0004	0.19933	0.0508	0.0027	180.6	9.2	181.3	2.5	200	120	2	153000	71.1	<320	4.01	0.09	<7.8	453	437900	0.95		<0.11	0.0103	25.97	0.059	0.98	1.86	0.667	9.76	2.76	33.9	13.21	70.2	16.64	167.5	39.6	10470	0.257
AC25	RIM	AC25 RIM	191025	191025_278_LC1458	LC1458	30	5	3.5	0.188	0.01	0.02679	0.00042	0.043713	0.0516	0.0028	174.2	8.5	170.4	2.7	230	110	161	153000	63	<350	4.44	0.4	290	629	447100	0.997		1.54	0.042	31.07	0.127	1.78	3.43	1.25	14.22	4.03	48.1	18.76	98.8	22.71	235.3	56.9	10580	0.283
AC25	CORE	AC25 CORE	191025	191025_280_LC1459	LC1459	30	5	3.5	0.183	0.01	0.02559	0.00047	0.071552	0.0527	0.0029	170.1	8.6	162.9	2.9	280	120	107	153000	214	<350	5.01	0.44	<8.3	1210	438500	2.42		0.55	0.09	68.6	0.216	3.26	7.23	1.79	33.8	9.8	106	38.1	184	39.5	368	77.1	10180	0.498
AC25	RIM	AC25 RIM	191025	191025_281_LC1460	LC1460	30	5	3.5	0.201	0.016	0.02688	0.00052	0.025163	0.0551	0.0045	185	14	171	3.3	340	170	0.86	153000	69	<340	3.73	0.13	<9.2	391	448700	0.564		<0.098	0.0096	19.95	0.044	0.88	1.82	0.646	8.23	2.53	29.5	11.68	60.5	13.8	140.7	32.36	10490	0.18
AC25	RIM	AC25 RIM	191025	191025_282_LC1461	LC1461	30	5	3.5	0.27	0.039	0.0263	0.0011	0.20998	0.075	0.011	240	32	167.3	7.1	910	330	17	153000	100	<510	6.8	0.9	520	457	442000	0.65		1.17	0.037	25.15	0.066	1.08	2.82	0.89	10.48	3.15	38.1	13.95	72.4	15.37	148.9	32.6	9450	0.213
AC25	CORE	AC25 CORE	191025	191025_283_LC1462	LC1462	30	5	3.5	0.197	0.022	0.02723	0.00077	0.094012	0.0529	0.0059	182	18	173.2	4.8	260	230	55	153000	98	<440	3.5	<0.12	<12	612	429500	0.68		1.04	0.043	18.96	0.07	1.48	2.81	1.44	14.9	4.2	48.8	18.5	95.5	20.2	203	46.5	9120	0.137
AC25	RIM	AC25 RIM	191025	191025_285_LC1463	LC1463	30	5	3.5	0.194	0.018	0.02613	0.00056	0.52698	0.0534	0.0045	180	15	166.3	3.5	300	180	0.86	153000	113	<450	4.3	0.225	<12	565	436400	1.15		0.58	0.0101	29.93	0.063	1.1	2.42	1.15	12.66	3.75	44.4	16.99	86.5	19.22	191.8	43	9140	0.215
AC25	CORE	AC25 CORE	191025	191025_286_LC1464	LC1464	30	5	3.5	0.178	0.02	0.02748	0.00065	0.1413	0.0467	0.0051	165	17	174.7	4.1	30	220	7.2	153000	114	<380	6.38	0.385	<9.2	570	446000	0.69		0.083	0.019	20.54	0.096	1.47	3.21	1.06	14.89	4.05	49.9	17.96	87.5	19.62	181.8	39.2	10500	0.246
AC25	RIM	AC25 RIM	191025	191025_287_LC1465	LC1465	30	5	3.5	0.19	0.011	0.02725	0.00052	0.46518	0.0509	0.0028	176.2	9.7	173.3	3.3	210	120	<0.62	153000	54	<360	3.97	0.105	<8.1	594	431000	0.806		<0.068	0.0075	30.3	0.066	1.54	2.98	1.47	15.4	4.2	48.8	17.46	87	19.16	194.6	48.3	10110	0.158
AC25	CORE	AC25 CORE	191025	191025_288_LC1466	LC1466	30	5	3.5	0.188	0.013	0.02661	0.00052	0.10508	0.0507	0.0035	174	11	169.3	3.3	220	150	400	153000	166	<410	7	0.59	29.1	860	446700	1.61		1.48	0.167	40.9	0.134	1.96	4.04	1.03	20.5	6.18	74.3	27.69	135.4	28.34	268.2	56.5	10230	0.466
AC25	RIM	AC25 RIM	191025	191025_290_LC1467	LC1467	30	5	3.5	0.2	0.018	0.02674	0.00057	0.0071287	0.0559	0.0051	184	16	170.1	3.6	360	190	245	153000	80	<400	6.9	4.77	273	479	454600	0.748		2.57	0.098	24.76	0.086	1.07	1.88	0.77	9.85	2.95	34.3	13.79	74.6	17.26	186.9	45.9	10580	0.251
AC25	CORE	AC25 CORE	191025	191025_291_LC1468	LC1468	30	5	3.5	0.182	0.024	0.02778	0.00071	0.17484	0.0492	0.0065	168	20	176.6	4.4	70	250	<0.71	153000	71	<430	3.88	<0.12	<10	535	459600	0.617		<0.12	<0.0057	21.38	0.108	1.79	3	0.96	12.43	3.49	41.5	15.94	82.2	18.75	200.5	47	10150	0.192
AC25	RIM	AC25 RIM	191025	191025_292_LC1469	LC1469	30	5	3.5	0.209	0.025	0.02778	0.00079	0.17397	0.0555	0.0072	192	21	176.6	5	340	270	1.52	153000	54	<530	3.05	<0.14	<13	224.3	463000	0.349		0.72	<0.0063	15.34	0.022	0.61	1.02	0.45	5.26	1.28	16.4	6.6	34.3	8.34	96	23.85	11010	0.093
AC25	CORE	AC25 CORE	191025	191025_293_LC1470	LC1470	30	5	3.5	0.222	0.019	0.02757	0.00065	0.12724	0.059	0.0053	203	16	175.3	4	490	190	12.2	153000	114	<420	5.05	0.252	18.8	603	450800	1.11		0.16	0.048	27.2	0.068	1.45	2.77	0.8	12.9	3.94	50.7	19.1	99.8	21.7	208	46.3	10690	0.305
AC25	RIM	AC25 RIM	191025	191025_295_LC1471	LC1471	30	5	3.5	0.189	0.016	0.02677	0.00057	0.18508	0.0509	0.0043	174	14	170.3	3.5	180	170	<0.69	153000	54	<400	2.86	<0.11	<11	205.6	459400	0.378		<0.1	<0.0082	14.19	0.0224	0.39	0.75	0.377	3.74	1.164	14.49	5.88	31.9	7.5	84.5	21.44	10920	0.109
AC25	CORE	AC25 CORE	191025	191025_296_LC1472	LC1472	30	5	3.5
AC25	RIM	AC25 RIM	191025	191025_297_LC1473	LC1473	30	5	3.5	0.201	0.013	0.02813	0.0007	0.09897	0.0518	0.0036	185	11	178.8	4.4	230	150	<0.73	153000	104	<430	5.18	0.268	<12	517.8	450500	1.28		0.45	<0.0066	34.12	0.056	1.14	3.46	0.858	14.32	3.99	45.2	16.45	78.8	17.19	164.5	36.12	10490	0.343
AC25	CORE	AC25 CORE	191025	191025_298_LC1474	LC1474	30	5	3.5
AC25	RIM	AC25 RIM	191025	191025_305_LC1475	LC1475	30	5	3.5	0.213	0.018	0.02829	0.00061	0.20754	0.0539	0.0045	195	15	179.8	3.8	290	170	<0.63	153000	130	<340	6.23	0.278	<9.1	434	443400	0.767		<0.1	<0.0053	23.07	0.037	0.77	1.91	0.648	10.21	3.12	37	13.79	67.5	14.63	138.4	29.3	10030	0.272
AC25	CORE	AC25 CORE	191025	191025_306_LC1476	LC1476	30	5	3.5	0.187	0.012	0.02776	0.00037	0.5106	0.0479	0.0028	173	10	176.5	2.3	80	120	8.9	153000	185	<340	4.88	0.646	<8.9	835	438800	1.6		0.126	0.0211	37.3	0.104	1.98	4.12	1.17	18.52	5.86	68.8	26.15	130	29.18	283.2	61.9	10280	0.495
AC25	RIM	AC25 RIM	191025	191025_307_LC1477	LC1477	30	5	3.5	0.222	0.014	0.02819	0.00042	0.21495	0.0563	0.0035	203	12	179.2	2.6	400	130	850	153000	59	<330	11	0.189	60	389	430300	0.689		1.88	0.324	20.59	0.086	0.91	1.31	0.598	7.32	2.26	28.2	11.35	61.8	14.54	155.4	37.9	10260	0.158
AC25	CORE	AC25 CORE	191025	191025_308_LC1478	LC1478	30	5	3.5	0.1903	0.009	0.02659	0.00055	0.40293	0.0536	0.0028	176.7	7.6	169.2	3.5	330	110	13.6	153000	87	<440	5.5	5.27	284	510	470000	1.97		1.57	0.165	27.1	0.169	1.91	1.55	1.19	7.17	2.3	31.5	13.6	83.2	22.7	270	71.9	17790	1.78
AC25	RIM	AC25 RIM	191025	191025_310_LC1479	LC1479	30	5	3.5	0.204	0.015	0.02845	0.00062	0.15118	0.0513	0.0037	188	13	180.8	3.9	210	150	8.96	153000	37	<320	5.01	2.43	487	399.1	436400	0.413		1.23	0.062	15.54	0.183	2.55	2.6	1.96	9.99	2.58	29.37	11.5	60.3	13.69	151.2	38.72	10110	0.078
AC25	CORE	AC25 CORE	191025	191025_311_LC1480	LC1480	30	5	3.5
AC25	RIM	AC25 RIM	191025	191025_312_LC1481	LC1481	30	5	3.5	0.18	0.024	0.0286	0.00075	0.11004	0.0448	0.0062	166	21	181.8	4.7	-90	250	<0.63	153000	75	<390	3.95	0.122	<11	288.4	428300	0.523		<0.11	<0.0071	15.72	0.0168	0.5	1.2	0.418	5.89	1.831	22.06	9.01	46.5	10.52	108.4	25.63	10130	0.18
AC25	CORE	AC25 CORE	191025	191025_313_LC1482	LC1482	30	5	3.5	0.187	0.012	0.02859	0.00061	0.14239	0.0467	0.0033	173	10	181.7	3.8	50	150	<0.63	153000	68	<350	3.44	<0.096	<9.7	428	448000	0.407		<0.072	0.117	15.42	0.104	1.59	2.48	0.923	11.13	2.93	34.7	12.9	66.1	14.85	155.3	36.4	10370	0.114
AC25	RIM	AC25 RIM	191025	191025_315_LC1483	LC1483	30	5	3.5	0.202	0.026	0.02783	0.00097	0.013934	0.0514	0.0071	186	22	176.9	6.1	190	280	<0.83	153000	164	<440	2.88	<0.13	<10	317.6	427000	0.51		<0.06	0.097	15.01	0.042	0.81	0.96	0.45	5.08	1.86	21.7	9.07	52.1	11.83	129.1	33.3	9690	0.147
AC25	CORE	AC25 CORE	191025	191025_316_LC1484	LC1484	30	5	3.5	0.216	0.019	0.02749	0.00053	0.28281	0.0555	0.0047	197	16	174.8	3.3	350	180	8.5	153000	54	<360	3.17	0.189	<9	315.7	442900	0.49		<0.11	0.042	15.8	0.044	0.86	1.26	0.544	6.84	2.05	24.04	9.6	51.6	11.96	123	29.68	10390	0.155
AC25	RIM	AC25 RIM	191025	191025_317_LC1485	LC1485	30	5	3.5	0.193	0.016	0.02817	0.00054	0.052855	0.0487	0.0042	178	13	179.1	3.4	90	170	2.82	153000	48	<340	2.85	<0.099	<9.8	226.3	436700	0.388		0.026	0.0099	13.35	0.0298	0.6	0.88	0.4	4.34	1.172	15.42	6.6	35.2	8.86	99	26.17	10560	0.116
AC25	RIM	AC25 RIM	191025	191025_318_LC1486	LC1486	30	5	3.5	0.207	0.013	0.0271	0.00048	0.11358	0.0544	0.0036	190	11	172.4	3	370	130	61	153000	106	<350	6.8	0.55	310	787	438200	1.47		3.2	0.077	42.06	0.218	2.78	4.02	2.03	18.5	5.47	64.3	24.12	124.3	27.13	265.4	60.2	9660	0.303
AC25	CORE	AC25 CORE	191025	191025_320_LC1487	LC1487	30	5	3.5	0.174	0.021	0.02709	0.00095	0.18403	0.0458	0.0061	162	18	172.3	5.9	-40	250	2.6	153000	163	<560	6.1	0.38	<14	472	451000	0.86		<0.13	0.088	25.36	0.057	1.08	2.22	0.48	10.5	3.6	40.2	14.54	74.3	16.26	154.8	33.1	10900	0.331
AC25	RIM	AC25 RIM	191025	191025_321_LC1488	LC1488	30	5	3.5	0.187	0.017	0.02717	0.00051	0.09247	0.0492	0.0046	173	14	172.8	3.2	100	190	3.6	153000	81	<390	3.99	0.21	<11	528	444500	0.96		<0.12	<0.0072	28.3	0.051	0.86	1.89	0.74	10.29	3.16	39	15.89	84.5	19.2	196	44.4	10680	0.236
AC25	CORE	AC25 CORE	191025	191025_322_LC1489	LC1489	30	5	3.5	0.196	0.015	0.02787	0.00063	0.014304	0.05	0.0038	181	12	177.2	3.9	170	160	420	153000	93	<380	5.4	0.272	14	433.5	436200	0.652		8.6	0.096	18.59	0.061	0.83	1.86	0.67	9.06	2.83	33.5	13.04	70.4	15.79	162.2	37.69	10240	0.205
AC25	RIM	AC25 RIM	191025	191025_323_LC1490	LC1490	30	5	3.5	0.186	0.019	0.02812	0.00073	0.039526	0.0472	0.0048	172	16	178.7	4.6	10	200	<0.66	153000	55	<380	3.52	<0.11	<9.9	347.2	452200	0.538		<0.16	0.0045	18.97	0.0383	0.59	1.54	0.632	6.43	2.09	24.74	10.2	56.5	13.02	138.4	33.88	10490	0.138
AC25	CORE	AC25 CORE	191025	191025_325_LC1491	LC1491	30	5	3.5	0.184	0.014	0.0267	0.00057	0.010306	0.0499	0.0041	173	13	169.9	3.6	140	160	0.85	153000	122.8	<330	5.95	0.216	<8.5	628	430500	0.838		<0.12	0.0044	20.13	0.093	1.52	3.11	0.94	14.96	4.58	53.4	19.36	99.8	20.97	205	43.8	10140	0.312
AC25	RIM	AC25 RIM	191025	191025_326_LC1492	LC1492	30	5	3.5	0.208	0.025	0.02799	0.00077	0.093644	0.0529	0.0062	190	20	177.9	4.8	250	240	350	153000	73.4	<340	8.7	0.164	16.3	280.2	427900	0.485		3.8	0.177	13.06	0.062	0.61	1.44	0.401	6.49	1.887	22.83	8.53	43.8	9.77	97.9	22.42	10280	0.17
AC22	RIM	AC22 RIM	191025	191025_327_LC1493	LC1493	30	5	3.5	0.213	0.018	0.02957	0.00077	0.057167	0.0515	0.0045	195	15	187.8	4.8	190	170	5.46	153000	166	<450	10	0.573	12.8	488.1	453500	0.676		<0.16	0.0074	14.13	0.046	0.89	1.88	0.543	9.97	3.22	39.7	15.14	78.3	17.29	170.8	38.28	9880	0.277
AC22	RIM	AC22 RIM	191025	191025_328_LC1494	LC1494	30	5	3.5	0.232	0.037	0.028	0.0014	0.023212	0.061	0.01	209	30	178.2	8.5	460	350	8	153000	193	<430	14.7	0.38	<11	438	463000	0.548		<0.14	<0.0054	14.83	0.081	1.26	2.62	0.7	11.5	3.31	39.1	13.72	65.8	14.5	133	28.4	9910	0.211
AM4 DYKE	RIM	AM4 DYKE RIM	191025	191025_335_LC1495	LC1495	30	5	3.5	0.169	0.011	0.02724	0.00061	0.024606	0.0453	0.003	157.9	9.4	173.2	3.8	-40	130	6.6	153000	160	<330	7.78	0.213	18.5	541	450000	0.945		0.048	0.0108	23.07	0.064	1.04	2.47	0.744	12.22	3.63	44.7	16.91	85.8	18.96	183.3	39.08	10250	0.322
AM4 DYKE	RIM	AM4 DYKE RIM	191025	191025_336_LC1496	LC1496	30	5	3.5	0.1942	0.0085	0.02782	0.00055	0.26227	0.0508	0.0022	180	7.2	176.9	3.4	213	96	0.65	153000	76	<330	4.31	0.144	<8.7	394	457000	0.666		<0.093	0.0314	22.24	0.054	0.81	1.7	0.467	6.87	2.22	29.4	11.51	62.2	14.53	161.8	40.7	11830	0.214
AM4 DYKE	CORE	AM4 DYKE CORE	191025	191025_337_LC1497	LC1497	30	5	3.5	0.203	0.015	0.02767	0.00059	0.015833	0.0524	0.004	187	13	175.9	3.7	240	160	<0.63	153000	151	<350	5.77	0.309	<9.6	854	444600	0.957		<0.12	0.0082	23.06	0.106	2.08	4.51	1.3	21.6	6.44	74.1	27.3	136.1	29.6	283	60.8	10200	0.331
AM4 DYKE	RIM	AM4 DYKE RIM	191025	191025_338_LC1498	LC1498	30	5	3.5	0.197	0.01	0.02791	0.00071	0.47954	0.0506	0.0023	182.2	8.7	177.4	4.5	210	100	<0.79	153000	68	<440	3.27	0.21	<11	425	433000	0.65		<0.16	0.019	23.64	0.054	0.95	1.54	0.79	9.02	2.63	33.3	12.43	67.3	15.57	174.3	41.9	11230	0.13
AM4 DYKE	CORE	AM4 DYKE CORE	191025	191025_340_LC1499	LC1499	30	5	3.5	0.1983	0.0088	0.02767	0.00035	0.19479	0.0508	0.0022	183.3	7.4	175.9	2.2	207	95	<0.57	153000	29.2	<330	1.97	<0.098	<8.1	457	428500	0.237		<0.13	0.023	10.04	0.11	1.67	2.32	1.35	10.66	3.06	34	13.46	71.7	16.69	181.3	50.3	10370	0.03
AM4 DYKE	RIM	AM4 DYKE RIM	191025	191025_341_LC1500	LC1500	30	5	3.5	0.1885	0.0073	0.02707	0.00036	0.33099	0.0497	0.0018	175.1	6.2	172.2	2.3	164	80	1.01	153000	17.7	<320	2.46	<0.089	<8.4	412.6	442400	0.315		<0.024	0.026	11.28	0.063	0.77	1.42	0.926	7.69	2.3	29.7	11.79	64.4	15.72	182.2	48.7	10770	0.039
AM4 DYKE	RIM	AM4 DYKE RIM	191025	191025_342_LC1501	LC1501	30	5	3.5	0.194	0.015	0.02744	0.00057	0.14616	0.0509	0.0045	179	13	174.5	3.6	170	180	136	153000	99	<340	6.3	0.207	11.1	876	441800	0.852		1.06	0.06	28.95	0.168	3	5.4	1.71	23.55	6.52	75.4	28.16	135.3	29.24	274	58.5	10000	0.268
AM4 DYKE	CORE	AM4 DYKE CORE	191025	191025_343_LC1502	LC1502	30	5	3.5	0.191	0.01	0.02772	0.00076	0.2155	0.052	0.003	177	9	176.2	4.7	260	130	16	153000	49	<400	3.1	<0.11	<11	511	470000	0.413		<0.12	0.057	15.9	0.089	1.18	1.72	0.8	8.19	2.32	32.8	13.82	82.4	20.2	230	62.8	10830	0.058
AM4 DYKE	RIM	AM4 DYKE RIM	191025	191025_345_LC1503	LC1503	30	5	3.5	0.1976	0.0061	0.02754	0.00045	0.11515	0.0512	0.0017	183	5.2	175.1	2.8	233	72	20.8	153000	39	<330	4.6	<0.1	18.8	340.7	431900	0.556		0.22	0.054	18.13	0.046	0.44	0.93	0.456	5.63	1.657	22	9.13	54.3	13.14	152.7	42	10930	0.151
AM4 DYKE	RIM	AM4 DYKE RIM	191025	191025_346_LC1504	LC1504	30	5	3.5	0.186	0.015	0.02807	0.00063	0.063045	0.0473	0.0038	172	13	178.5	4	40	160	1.42	153000	140	<330	5.87	0.407	<7.7	626	448000	0.845		<0.067	0.012	20.44	0.101	1.68	3.39	0.99	15	4.59	54.4	20	95.9	20.98	201.9	44.5	10580	0.245
AM4 DYKE	CORE	AM4 DYKE CORE	191025	191025_347_LC1505	LC1505	30	5	3.5	0.207	0.013	0.0269	0.00082	0.12689	0.0545	0.0039	191	11	171.1	5.1	370	170	250	153000	158	1050	4.8	3.71	228	1430	428000	2.05		0.72	0.248	59.4	0.436	6.1	10.7	2.65	42.3	12.1	133	45	212	45.1	434	91	11210	0.426
AM4 DYKE	RIM	AM4 DYKE RIM	191025	191025_348_LC1506	LC1506	30	5	3.5	0.1903	0.0061	0.02708	0.00043	0.20198	0.0502	0.0016	176.7	5.2	172.2	2.7	190	71	5.88	153000	286	<330	7.18	2.45	40.1	2478	440000	3.22		0.107	0.209	91.6	0.642	9.95	18.5	4.28	84.1	23.44	244.8	82.2	368	72.6	656	131.8	10180	0.707
AM4 DYKE	CORE	AM4 DYKE CORE	191025	191025_350_LC1507	LC1507	30	5	3.5	0.584	0.063	0.0326	0.0011	0.55512	0.126	0.012	457	41	207	6.6	1950	180	4260	153000	261	2430	8.1	4.45	1920	340	415200	0.38		1.16	0.401	13.1	0.148	1.1	2.15	0.7	8.02	2.46	29	10.74	52.2	11.23	111.3	24.7	10080	0.149
AM4 DYKE	RIM	AM4 DYKE RIM	191025	191025_351_LC1508	LC1508	30	5	3.5	0.168	0.016	0.0257	0.0012	0.21608	0.0489	0.0067	163	19	163.8	7.3	100	260	4.94	153000	147	<500	7.4	0.18	<13	508	440400	0.602		<0.18	0.069	15.89	0.121	1.62	2.4	0.89	11.8	3.61	42.6	15.9	79.4	17.4	167	36.4	9660	0.266
AM4 DYKE	RIM	AM4 DYKE RIM	191025	191025_352_LC1509	LC1509	30	5	3.5	0.27	0.023	0.02895	0.0006	0.44991	0.0663	0.0049	241	18	183.9	3.8	730	150	1720	153000	81	<390	17.1	0.308	40	425	411000	0.613		2.17	0.224	15.59	0.071	0.78	2.04	0.691	10.15	3.06	35.4	13.15	66.2	14.39	143	32.2	9730	0.175
AM4 DYKE	RIM	AM4 DYKE RIM	191025	191025_353_LC1510	LC1510	30	5	3.5	0.196	0.0073	0.02827	0.00042	0.48852	0.0495	0.0016	181.5	6.2	179.7	2.6	162	71	<0.6	153000	44.4	<340	2.2	<0.093	<8.5	456.5	440100	0.511		<0.12	0.0109	17.94	0.0333	0.58	1	0.56	6.59	2.11	28.3	12.63	73.4	18.81	220.6	64.2	11260	0.092
AM4 DYKE	RIM	AM4 DYKE RIM	191025	191025_355_LC1511	LC1511	30	5	3.5	0.1886	0.0064	0.02726	0.00043	0.23723	0.0496	0.0017	175.3	5.5	173.3	2.7	165	75	1.16	153000	39	<310	2.7	<0.092	<8.2	312.5	436000	0.334		<0.023	0.0191	13.3	0.0292	0.43	0.82	0.433	4.65	1.545	19.41	8.8	50.2	12.73	151.4	44.23	10320	0.048
AM4 DYKE	RIM	AM4 DYKE RIM	191025	191025_356_LC1512	LC1512	30	5	3.5	0.1878	0.0052	0.02672	0.00039	0.00035749	0.0505	0.0016	174.6	4.4	170	2.5	202	68	4.33	153000	41.9	<370	2.06	0.162	<9.4	356.2	439000	0.569		<0.076	0.07	24.97	0.093	1.07	1.21	0.54	5.61	1.71	21.73	9.36	56.7	15.12	174.9	49.5	11920	0.151
AM4 DYKE	CORE	AM4 DYKE CORE	191025	191025_357_LC1513	LC1513	30	5	3.5	0.19	0.012	0.02788	0.00076	0.44588	0.0514	0.0031	176	10	177.3	4.7	240	130	4.2	153000	186	<360	4.6	0.33	12.2	963	471000	1.58		0.2	0.214	50.4	0.226	1.95	3.96	1.28	21.5	6.57	80.6	29	148	32.3	320	72	10910	0.387
AM4 DYKE	RIM	AM4 DYKE RIM	191025	191025_358_LC1514	LC1514	30	5	3.5	0.197	0.015	0.02692	0.00071	0.45832	0.0517	0.0036	182	13	171.3	4.5	260	160	18.2	153000	43	<710	1.8	0.22	33	366	419000	0.53		0.31	0.04	22	0.044	0.69	0.84	0.32	5.1	1.63	22.1	9.35	57.9	15.67	190.2	56.8	13920	0.219
AM4 DYKE	RIM	AM4 DYKE RIM	191025	191025_365_LC1515	LC1515	30	5	3.5	0.1867	0.006	0.02763	0.00034	0.2154	0.0485	0.0016	173.7	5.1	175.7	2.1	132	75	2.66	153000	44	<370	3.28	0.148	28.1	506	431500	0.361		0.44	0.069	18.9	0.159	1.5	2.26	1.15	10.6	3.18	37.3	14.98	79.2	18.29	200.1	53.7	10470	0.066
AM4 DYKE	RIM	AM4 DYKE RIM	191025	191025_366_LC1516	LC1516	30	5	3.5	0.1879	0.0074	0.02854	0.00065	0.1752	0.0494	0.0024	174.8	6.3	181.4	4.1	160	110	0.77	153000	42	<390	3.18	0.151	<11	362	459000	0.57		<0.052	<0.0097	21.62	0.028	0.61	1.34	0.55	6.93	2.1	25.6	10.48	59.4	14.2	163.3	41.5	11320	0.125
AM4 DYKE	RIM	AM4 DYKE RIM	191025	191025_367_LC1517	LC1517	30	5	3.5
AM4 DYKE	RIM	AM4 DYKE RIM	191025	191025_368_LC1518	LC1518	30	5	3.5	0.288	0.029	0.038	0.0015	0.33703	0.0544	0.0053	254	23	240.5	9.2	290	190	76	153000	137	<360	9.1	0.71	<9.3	462	440700	0.582		0.67	0.0244	15.27	0.071	1.24	2.29	0.71	11.9	3.45	40.6	14.19	70.4	14.83	139.3	30.2	10050	0.229
AM4 DYKE	RIM	AM4 DYKE RIM	191025	191025_370_LC1519	LC1519	30	5	3.5	0.198	0.011	0.0284	0.00044	0.11121	0.0499	0.0027	182.6	9	180.5	2.8	170	120	2.03	153000	212	<360	7.08	1.08	<9.7	1272	433700	2.18		<0.12	0.049	45.7	0.242	3.47	7.2	1.56	35.8	10.27	115.2	41.3	192.7	40.6	392	81.5	10800	0.634
AM4 DYKE	RIM	AM4 DYKE RIM	191025	191025_371_LC1520	LC1520	30	5	3.5	0.226	0.014	0.03318	0.00061	0.081694	0.0489	0.0031	206	12	210.4	3.8	150	140	8.5	153000	130	<410	6.01	0.32	<10	388.4	435800	0.82		<0.079	0.046	20.05	0.045	0.62	1.47	0.478	7.9	2.6	30.8	11.71	60.7	13.92	141.9	31.71	10880	0.365
AM4 DYKE	RIM	AM4 DYKE RIM	191025	191025_372_LC1521	LC1521	30	5	3.5	0.201	0.019	0.02829	0.00065	0.18263	0.0523	0.0046	185	16	179.8	4.1	260	180	0.87	153000	185	<390	7.16	0.48	<9.2	960	461000	1.47		<0.043	0.0068	34.6	0.141	2.11	5.2	1.43	23.6	7.1	83.9	30.2	149.6	31.2	300	62.6	10280	0.391
AM4 DYKE	RIM	AM4 DYKE RIM	191025	191025_373_LC1522	LC1522	30	5	3.5	0.199	0.015	0.02712	0.00087	0.33577	0.0519	0.0037	184	13	172.5	5.4	270	170	15	153000	51	<590	2.84	0.3	32	472	440000	0.52		<0.27	0.146	17.7	0.086	1.29	1.01	0.37	6.37	2.13	29.2	12.1	75.7	19.4	238	70.9	11680	0.069
AM4 DYKE	RIM	AM4 DYKE RIM	191025	191025_375_LC1523	LC1523	30	5	3.5	0.1909	0.0071	0.02862	0.0004	0.028694	0.0479	0.0019	177.2	6	181.9	2.5	89	85	1.21	153000	48.3	<350	4.13	<0.099	<9.7	316.9	440700	0.582		<0.092	0.023	18.44	0.042	0.5	1.16	0.488	5.77	1.65	20.98	8.59	49.4	12.42	146.2	40.7	11230	0.095
AM4 DYKE	CORE	AM4 DYKE CORE	191025	191025_376_LC1524	LC1524	30	5	3.5	0.208	0.022	0.0278	0.00054	0.00074989	0.0536	0.0056	190	18	176.8	3.4	270	210	3.4	153000	174	<400	6.48	0.39	<9.9	707	443900	1.11		<0.033	0.073	21.71	0.129	2.12	3.72	0.99	17.4	5.12	61.3	22.44	110.5	23.67	232.8	50.3	10250	0.33
AM4 DYKE	RIM	AM4 DYKE RIM	191025	191025_377_LC1525	LC1525	30	5	3.5	0.206	0.015	0.02775	0.00059	0.0092351	0.0532	0.0039	189	12	176.4	3.7	310	170	1.2	153000	115	<370	7.02	0.27	<10	616	439900	1.17		0.111	0.049	33.93	0.084	1.17	2.72	0.708	13.39	4.15	49.8	19.2	99.7	21.44	210.8	45.7	10220	0.363
AM4 DYKE	RIM	AM4 DYKE RIM	191025	191025_378_LC1526	LC1526	30	5	3.5
AM4 DYKE	RIM	AM4 DYKE RIM	191025	191025_380_LC1527	LC1527	30	5	3.5	0.1885	0.0056	0.02692	0.00033	0.008613	0.0498	0.0016	175.2	4.7	171.2	2.1	174	71	1.45	153000	64	<400	3.71	0.166	<9.7	487	437000	0.673		<0.13	0.0251	24.74	0.046	0.71	1.5	0.57	7.45	2.47	31.5	13.4	76.7	19.11	222.8	60.1	10950	0.155
AM4 DYKE	RIM	AM4 DYKE RIM	191025	191025_381_LC1528	LC1528	30	5	3.5	0.195	0.022	0.02896	0.00073	0.24953	0.0475	0.0052	180	19	184	4.5	50	220	1.9	153000	61	<610	4.1	0.27	<15	525	430000	0.92		<0.19	0.023	24.19	0.043	0.71	1.99	0.57	9.2	2.95	38.5	15.47	83.6	19.84	211.2	54.2	10440	0.242
AM4 DYKE	CORE	AM4 DYKE CORE	191025	191025_382_LC1529	LC1529	30	5	3.5
AM4 DYKE	RIM	AM4 DYKE RIM	191025	191025_383_LC1530	LC1530	30	5	3.5	0.2217	0.0096	0.03082	0.0006	0.034784	0.0515	0.0025	202.9	8	195.7	3.7	230	110	790	153000	99	<380	4	0.47	52	626	435300	1.07		0.47	0.116	28.5	0.121	1.34	2.41	0.82	11.86	3.63	46.1	18.18	103.8	24.38	257.9	60	10650	0.314
AM4 DYKE	CORE	AM4 DYKE CORE	191025	191025_385_LC1531	LC1531	30	5	3.5	0.194	0.015	0.02713	0.00056	0.096378	0.051	0.004	179	13	172.5	3.5	190	170	<0.64	153000	171	<360	11.1	0.408	<9.9	861	441000	1.2		<0.026	0.0058	21.32	0.113	1.64	3.57	1.31	18.7	5.9	70.2	27.1	139.6	30.4	292.2	63	8350	0.323
AM4 DYKE	RIM	AM4 DYKE RIM	191025	191025_386_LC1532	LC1532	30	5	3.5	0.226	0.034	0.02828	0.00098	0.0441	0.057	0.0087	205	27	179.8	6.2	360	310	1.14	153000	111	<470	7.5	0.27	<11	466	429000	0.632		0.25	<0.013	14.91	0.06	0.81	2.09	0.89	11.28	3.3	41.2	14.53	74.5	16.21	159.3	34.3	9470	0.217
AM4 DYKE	CORE	AM4 DYKE CORE	191025	191025_387_LC1533	LC1533	30	5	3.5	0.196	0.014	0.02709	0.00052	0.047576	0.0518	0.0038	181	12	172.3	3.2	220	150	<0.65	153000	142	<380	5.22	0.239	<9.6	727	438600	1.48		0.04	<0.0077	42.9	0.072	1.55	3.3	0.92	17.4	4.96	60.9	23.04	113.8	24.89	235.4	49.3	10430	0.456
AM4 DYKE	RIM	AM4 DYKE RIM	191025	191025_388_LC1534	LC1534	30	5	3.5	0.1851	0.0064	0.02624	0.00047	0.3165	0.0504	0.0017	172.3	5.5	167	3	198	77	45	153000	57	<410	3.04	0.216	12.3	298	421000	0.497		0.12	0.077	21.9	0.069	0.64	1.39	0.551	5.63	1.74	21.9	8.57	46.3	11.71	124.9	32.4	11220	0.086
AM4 DYKE	RIM	AM4 DYKE RIM	191025	191025_395_LC1535	LC1535	30	5	3.5	0.193	0.018	0.02849	0.00095	0.25264	0.0515	0.0047	179	15	181.1	5.9	220	190	3.07	153000	153	<400	5.8	0.169	<9.8	386	471000	0.465		<0.044	0.0067	10.37	0.043	0.44	1.61	0.59	8	2.58	31.4	11.97	62.5	13.96	145.8	34	11040	0.175
AM4 DYKE	RIM	AM4 DYKE RIM	191025	191025_396_LC1536	LC1536	30	5	3.5	0.216	0.02	0.02893	0.00067	0.3882	0.0536	0.0047	197	17	183.9	4.2	270	180	0.7	153000	128	<350	5.55	0.234	<9.6	655	429700	0.77		<0.089	<0.0037	18.1	0.087	1.5	3.83	1.09	16.56	4.99	56.8	20.83	100.4	21.87	213.9	44.7	10220	0.225
AM4 DYKE	RIM	AM4 DYKE RIM	191025	191025_397_LC1537	LC1537	30	5	3.5	0.1984	0.005	0.02824	0.00037	0.1123	0.0506	0.0013	183.6	4.2	179.5	2.3	213	58	0.88	153000	37	<340	2.52	<0.1	<9.6	451.4	432500	0.602		<0.074	0.0087	20.66	0.039	0.59	1.04	0.501	6.56	2.016	26.8	12.06	73	18.9	224.2	64.1	11210	0.134
AM4 DYKE	CORE	AM4 DYKE CORE	191025	191025_398_LC1538	LC1538	30	5	3.5
AM4 DYKE	RIM	AM4 DYKE RIM	191025	191025_400_LC1539	LC1539	30	5	3.5	0.191	0.0095	0.02663	0.00047	0.049571	0.0516	0.0026	177.3	8.1	169.4	2.9	250	110	445	153000	49	<470	5.5	0.264	63	323	429000	0.509		0.22	0.185	19.42	0.121	1.04	1.07	0.473	5.37	1.43	19.5	8.49	50.4	13.11	152.4	43.4	10800	0.057
AM4 DYKE	CORE	AM4 DYKE CORE	191025	191025_401_LC1540	LC1540	30	5	3.5	0.357	0.04	0.02927	0.00075	0.32595	0.0878	0.0093	305	29	186	4.7	1210	230	990	153000	85	<380	7.5	1.12	481	563	422700	0.465		0.79	0.085	19.07	0.105	1.79	3.3	1.16	15.5	4.52	50.8	17.81	87.9	17.84	175.2	36.6	10050	0.144
AM4 DYKE	RIM	AM4 DYKE RIM	191025	191025_402_LC1541	LC1541	30	5	3.5	0.217	0.011	0.03206	0.00082	0.062062	0.0495	0.0027	198.9	9.4	203.4	5.1	150	120	89	153000	95	<390	4.39	0.31	34	641	435000	0.755		0.2	0.27	28.1	0.149	2.07	3.35	0.94	14.9	4.25	50.5	19.6	97.7	22.9	241	57.6	10010	0.2
AM4 DYKE	RIM	AM4 DYKE RIM	191025	191025_403_LC1542	LC1542	30	5	3.5	0.229	0.012	0.03277	0.00064	0.026094	0.0509	0.0028	209	10	207.8	4	210	120	11.4	153000	132	<380	5.98	0.333	<9.2	553	440000	1.07		<0.13	0.0146	26.7	0.056	0.81	2.14	0.699	11.33	3.7	44.9	17.07	88.2	19	187	42.5	10190	0.325
AM4 DYKE	RIM	AM4 DYKE RIM	191025	191025_405_LC1543	LC1543	30	5	3.5
AM4 DYKE	RIM	AM4 DYKE RIM	191025	191025_406_LC1544	LC1544	30	5	3.5	0.211	0.028	0.02808	0.00074	0.0028574	0.0562	0.0077	193	23	178.5	4.6	370	280	1.78	153000	158	<430	8.4	0.41	<12	704	449000	0.99		<0.11	0.0161	22.9	0.087	1.53	3.88	1.18	14.3	4.81	58.2	22.32	110.4	23.23	233	48.3	9640	0.31
AM4 DYKE	RIM	AM4 DYKE RIM	191025	191025_407_LC1545	LC1545	30	5	3.5	0.19	0.015	0.02876	0.00054	0.19735	0.0494	0.0042	176	13	182.8	3.4	150	180	0.91	153000	245	<420	5.79	0.38	<12	891	454000	1.67		<0.057	0.56	42.8	0.215	1.97	3.71	1.14	19.3	6.37	73.8	28.5	141	30	301	64.3	10840	0.474
AM4 DYKE	RIM	AM4 DYKE RIM	191025	191025_408_LC1546	LC1546	30	5	3.5	0.2	0.022	0.02677	0.00068	0.4287	0.0542	0.0057	183	19	170.3	4.3	380	190	<0.75	153000	195	<410	7.4	0.448	<11	803	435000	1.18		<0.14	0.085	25.4	0.146	2.21	4.2	1.22	19.1	5.83	67.2	25.5	127.3	27	257.5	56	9770	0.328
AM4 DYKE	CORE	AM4 DYKE CORE	191025	191025_410_LC1547	LC1547	30	5	3.5	0.187	0.018	0.02659	0.00075	0.066199	0.0516	0.005	173	15	169.1	4.7	220	200	36	153000	296	<420	11.1	0.604	<12	867	429000	1.54		<0.14	0.0191	29.7	0.114	1.87	4.13	0.85	17.7	5.48	70	26.38	136	29.1	279	60.1	9380	0.414
[truncated: 3,488 more rows]
[truncated: 66 more columns]
