# Supplementary material for: An abrupt switch in magmatic plumbing taps porphyry copper deposit-forming magmas
Source: Research Square preprint supplement (doi:10.21203/rs.3.rs-608569/v1), 2021-06-24
Supplement: Supplementary file 5 [file 4d9832b59ca48c1217252f1d.xlsx]

## Sheet: Zircon CA-ID-TIMS sample list
	Sample details for zircon CA-ID-TIMS
		WGS84
	Sample	Lat	Long	Drill hole	From	To	Unit	Approx. palaeo depth, km (after Dilles, 1987)	Notes
	AM13BAP	38.9774	-119.238				Aplite dyke	4	Aplite dyke hosting mineralised miaroloitc cavities cutting porphyry dyke and LHG cupola
	AM63A	38.9774	-119.236				Aplite dyke	4	Aplite dyke hosting mineralised miaroloitc cavities cutting LHG cupola
	MA9	39.0413	-119.242				Bear QM, inner	4
	BH10	39.0107	-119.293				Bear QM, outer	2.5
	BS1	39.0246	-119.362				Fulstone volcanics	0
	BS16	39.0735	-119.406				Fulstone volcanics	0
	AM18LHG	38.9766	-119.23				LHG, upper	4.5
	LH24S	38.9566	-119.104				LHG, deep	7.5	Sample from palaeo-deepest exposure of LHG (Dilles, 1987)
	AM4QMD	38.9612	-119.231				McLeod QMD, inner	6
	AM72	38.9741	-119.259				McLeod QMD, outer	3
	AC25			EG-AM-13-036	564.34 m	564.63 m	Porphyry dyke, Ann Mason deposit	3.5	Mason drill core: 'QMPD' (late) dyke cutting LHG

## Sheet: Zircon results
	BH10
		Dates (Ma)											Composition							Isotopic Ratios
		206Pb/
		238U	±2σ	206Pb/	±2σ	207Pb/	±2σ	207Pb/	±2σ	Corr.			mass	Th/	Th/U	Pb*	Pbc	Pb*/		206Pb/	208Pb/	206Pb/		207Pb/		207Pb/
	Fraction	<Th> a	abs	238U b	abs	235U b	abs	206Pb b	abs	coef.	% disc c		U(ng)	U d	(magma) e	(pg) f	(pg) g	Pbc h		204Pb i	206Pb j	238U j	±2σ %	235U j	±2σ %	206Pb j	±2σ %
	Zircon
	z6	169.039	0.0814019	168.961	0.0814222	169.219	0.175857	172.836	1.9081	0.765034	2.24203		1.05754	0.84908	3.22	31.8991	0.121899	261.685		14447.9	0.26969	0.0265565	0.0488243	0.181347	0.112823	0.0495487	0.075081
	z2Tip	169.094	0.0813843	169.016	0.0814059	169.231	0.170344	172.244	1.62779	0.886936	1.87378		3.08057	0.884963	3.36	93.7594	0.117046	801.05		43808.6	0.281087	0.0265654	0.0487988	0.181362	0.109278	0.0495361	0.0617768
	z4	169.156	0.0788371	169.078	0.0788585	169.227	0.166505	171.31	1.72612	0.809887	1.30292		1.38349	0.575029	2.18	38.9829	0.173413	224.797		13296.9	0.182643	0.0265752	0.0472547	0.181356	0.106818	0.0495163	0.0664818
	z1	169.184	0.0895744	169.106	0.0895945	169.381	0.198621	173.225	2.12983	0.787317	2.37784		1.26435	0.79672	3.02	37.6855	0.202653	185.961		10404.2	0.253057	0.0265796	0.0536794	0.181535	0.127316	0.0495569	0.0853352
	z8	169.2	0.0786896	169.121	0.0787105	169.364	0.156504	172.754	1.50711	0.858107	2.10282		1.34701	0.894015	3.39	41.1127	0.127252	323.082		17641.4	0.28396	0.0265821	0.0471541	0.181516	0.100328	0.049547	0.0558815
	z3	169.275	0.0842741	169.196	0.0842991	169.327	0.230523	171.154	2.60812	0.79841	1.14391		0.392649	0.848103	3.22	11.8572	0.101183	117.186		6481.67	0.269376	0.0265941	0.0504799	0.181473	0.147807	0.049513	0.106928
	z2Body	169.308	0.128068	169.23	0.128101	169.501	0.425763	173.297	4.36972	1.08054	2.34677		2.49744	0.879415	3.34	76.0083	0.277923	273.487		14988.4	0.279321	0.0265994	0.0766946	0.181676	0.272734	0.0495585	0.184432
	MA9
		Dates (Ma)											Composition							Isotopic Ratios
		206Pb/
		238U	±2σ	206Pb/	±2σ	207Pb/	±2σ	207Pb/	±2σ	Corr.			mass	Th/	Th/U	Pb*	Pbc	Pb*/		206Pb/	208Pb/	206Pb/		207Pb/		207Pb/
	Fraction	<Th> a	abs	238U b	abs	235U b	abs	206Pb b	abs	coef.	% disc c		U(ng)	U d	(magma) e	(pg) f	(pg) g	Pbc h		204Pb i	206Pb j	238U j	±2σ %	235U j	±2σ %	206Pb j	±2σ %
	Zircon
	z9	167.511	0.0850428	167.433	0.0850671	167.612	0.228389	170.144	2.74945	0.698847	1.59313		0.638039	0.390386	1.48	16.9466	0.149777	113.146		7038.58	0.124007	0.0263133	0.0514693	0.179479	0.147816	0.0494916	0.113207
	z10	167.565	0.100982	167.486	0.101014	167.652	0.446346	169.994	6.15318	0.501775	1.47535		0.130932	0.590015	2.24	3.66832	0.134546	27.2644		1622.38	0.18742	0.0263218	0.0610984	0.179526	0.288817	0.0494884	0.261515
	z7	167.6	0.100519	167.521	0.100561	167.955	0.356691	174.071	4.25862	0.83785	3.76266		0.641202	0.593073	2.25	17.9838	0.354301	50.7584		3002.23	0.188391	0.0263274	0.0608124	0.179877	0.230421	0.0495749	0.179617
	z2	167.634	0.105861	167.556	0.105917	168.109	0.443109	175.906	5.24984	0.962117	4.74685		0.302743	0.579174	2.2	8.46253	0.105142	80.4865		4766.89	0.183975	0.0263329	0.0640378	0.180057	0.286005	0.0496139	0.222729
	z8	167.677	0.101723	167.598	0.101762	168.188	0.406289	176.493	5.03441	0.803147	5.03972		0.265303	0.539272	2.05	7.34111	0.222076	33.0567		1988.88	0.1713	0.0263396	0.0615104	0.180148	0.262127	0.0496264	0.213415
	z1	167.766	0.0877015	167.688	0.0877276	167.951	0.225611	171.663	2.65127	0.721822	2.31529		0.892203	0.418674	1.589	23.9178	0.156246	153.078		9443.24	0.132991	0.0263539	0.0529993	0.179873	0.145747	0.0495238	0.10886
	z5	167.767	0.114713	167.689	0.114766	167.96	0.668393	171.792	9.05932	0.678275	2.38847		0.252962	0.59712	2.27	7.10914	0.150955	47.0943		2784.03	0.189674	0.026354	0.0693339	0.179884	0.431767	0.0495265	0.386744
	z3	167.837	0.0963803	167.759	0.0964213	167.848	0.379426	169.105	4.75216	0.775003	0.795947		0.30306	0.448012	1.7	8.192	0.111752	73.3049		4496.16	0.14231	0.0263651	0.0582273	0.179753	0.245252	0.0494696	0.200886
	z4	168.063	0.177863	167.984	0.177989	167.727	1.16789	164.093	15.7331	0.796413	-2.37117		0.131712	0.520664	1.98	3.63442	0.183298	19.8279		1206.26	0.165386	0.0264011	0.107342	0.179612	0.755396	0.0493636	0.672266
	z6A	168.733	0.108193	168.654	0.108213	169.034	0.187339	174.347	1.73633	0.841478	3.26531		2.28815	0.308617	1.17	59.8613	0.259563	230.623		14653.5	0.0980265	0.0265078	0.0650054	0.181132	0.12031	0.0495808	0.0670003
	z6B	169.093	0.0822899	169.015	0.0823042	169.089	0.177719	170.131	2.30741	0.505165	0.655884		1.53854	0.47376	1.8	42.1941	0.295104	142.981		8692.42	0.150478	0.0265651	0.0493376	0.181196	0.114098	0.0494913	0.0933592
	AM72
		Dates (Ma)											Composition							Isotopic Ratios
		206Pb/
		238U	±2σ	206Pb/	±2σ	207Pb/	±2σ	207Pb/	±2σ	Corr.			mass	Th/	Th/U	Pb*	Pbc	Pb*/		206Pb/	208Pb/	206Pb/		207Pb/		207Pb/
	Fraction	<Th> a	abs	238U b	abs	235U b	abs	206Pb b	abs	coef.	% disc c		U(ng)	U d	(magma) e	(pg) f	(pg) g	Pbc h		204Pb i	206Pb j	238U j	±2σ %	235U j	±2σ %	206Pb j	±2σ %
	Zircon
	z5	168.327	0.125938	168.249	0.125967	168.539	0.91057	172.608	13.3132	0.271863	2.52537		0.376274	0.736034	2.79	10.9914	0.626548	17.5427		1012.71	0.233793	0.0264432	0.0758507	0.180556	0.586352	0.0495439	0.569502
	z6	168.345	0.191144	168.267	0.191187	168.517	1.60595	172.027	23.3993	0.3276	2.18545		0.138189	0.868895	3.298	4.17084	0.385281	10.8254		612.18	0.275995	0.0264461	0.115111	0.18053	1.03425	0.0495315	1.00194
	z4	168.367	0.142457	168.289	0.142487	168.387	1.07964	169.764	15.7036	0.328881	0.868874		0.134837	0.977546	3.71	4.17682	0.257187	16.2404		886.593	0.310506	0.0264495	0.0857782	0.180379	0.695799	0.0494835	0.671706
	z10	168.43	0.115032	168.352	0.115061	168.693	0.466193	173.48	5.98701	0.696696	2.95592		0.386287	0.897366	3.406	11.7454	0.246114	47.7234		2619.14	0.285037	0.0264596	0.0692418	0.180736	0.299947	0.0495624	0.254512
	z11	168.444	0.14533	168.366	0.145404	168.425	0.898706	169.25	12.0205	0.770259	0.522274		0.171747	0.708848	2.69	4.98613	0.189583	26.3004		1519.5	0.225156	0.0264618	0.0874945	0.180423	0.579073	0.0494726	0.513695
	z1	168.483	0.0920303	168.404	0.0920625	168.607	0.357699	171.455	4.66915	0.630382	1.7794		0.357785	0.704864	2.68	10.3795	0.126141	82.2853		4720.02	0.22389	0.0264679	0.0553847	0.180635	0.23025	0.0495194	0.197377
	z9	168.523	0.119788	168.445	0.119823	168.691	0.617461	172.149	8.45318	0.556493	2.15159		0.191896	0.759753	2.88	5.64525	0.169277	33.3491		1897.77	0.241324	0.0264744	0.0720683	0.180733	0.397277	0.0495341	0.360707
	AM4QMD
		Dates (Ma)											Composition							Isotopic Ratios
		206Pb/
		238U	±2σ	206Pb/	±2σ	207Pb/	±2σ	207Pb/	±2σ	Corr.			mass	Th/	Th/U	Pb*	Pbc	Pb*/		206Pb/	208Pb/	206Pb/		207Pb/		207Pb/
	Fraction	<Th> a	abs	238U b	abs	235U b	abs	206Pb b	abs	coef.	% disc c		U(ng)	U d	(magma) e	(pg) f	(pg) g	Pbc h		204Pb i	206Pb j	238U j	±2σ %	235U j	±2σ %	206Pb j	±2σ %
	Zircon
	z17	167.476	0.203255	167.397	0.201337	167.101	1.75041	162.909	24.1913	0.848835	-2.75536		0.12724	0.521243	1.972	3.49908	0.303433	11.5316		709.023	0.165575	0.0263076	0.121843	0.178886	1.13607	0.0493386	1.03415
	z2	167.477	0.109858	167.399	0.105315	167.802	0.508793	173.497	6.72529	0.696717	3.51464		0.43018	0.467737	1.78	11.6654	0.324189	35.9832		2204.48	0.148579	0.0263079	0.0637328	0.1797	0.328954	0.0495627	0.286377
	z12	167.525	0.106324	167.459	0.0954888	167.645	0.332932	170.276	3.81087	0.928591	1.65455		0.257745	0.651635	1.72	7.33514	0.130591	56.1689		3271.29	0.206979	0.0263174	0.057766	0.179518	0.215438	0.0494944	0.159971
	z7	167.54	0.131109	167.46	0.129455	167.25	0.79266	164.278	10.6853	0.762702	-1.93688		0.12551	0.61538	2.49	3.53859	0.111625	31.7005		1871.42	0.195479	0.0263176	0.0783135	0.179059	0.51404	0.0493675	0.455978
	z9	167.563	0.13954	167.485	0.137698	167.63	0.419614	169.672	4.76402	0.863466	1.28877		0.295811	0.653743	2.47	8.42432	0.0759172	110.967		6441.64	0.207663	0.0263216	0.0832876	0.179499	0.271553	0.0494816	0.201427
	z3	167.588	0.18029	167.51	0.178892	167.253	1.29842	163.614	18.6153	0.475532	-2.38121		0.185175	0.643493	2.44	5.26002	0.587152	8.95854		538.092	0.204407	0.0263255	0.108188	0.179061	0.842015	0.0493535	0.795618
	z13	167.658	0.0866199	167.574	0.0840944	167.919	0.247824	172.775	2.92071	0.771663	3.01032		0.554341	0.453228	2.15	14.9897	0.131927	113.621		6948.78	0.143973	0.0263358	0.0508385	0.179835	0.160126	0.0495474	0.120888
	z1	167.679	0.106923	167.6	0.103826	167.692	0.288856	168.985	3.57792	0.656106	0.819417		0.496513	0.578071	2.19	13.877	0.150303	92.3271		5467.72	0.183625	0.0263399	0.0627572	0.179572	0.186869	0.049467	0.149741
	z14	167.77	0.105894	167.695	0.100766	167.609	0.553268	166.396	7.67435	0.551857	-0.780641		0.231192	0.565459	1.92	6.44378	0.322949	19.9529		1199.75	0.179614	0.026355	0.0608738	0.179475	0.358087	0.0494122	0.326843
	z15	167.963	0.0804996	167.884	0.0756073	168.032	0.300886	170.112	3.94789	0.634223	1.30935		0.466397	0.504957	1.97	12.81	0.198444	64.5522		3901.97	0.160398	0.0263851	0.0456243	0.179967	0.19429	0.0494909	0.165948
	AM18LHG
		Dates (Ma)											Composition							Isotopic Ratios
		206Pb/
		238U	±2σ	206Pb/	±2σ	207Pb/	±2σ	207Pb/	±2σ	Corr.			mass	Th/	Th/U	Pb*	Pbc	Pb*/		206Pb/	208Pb/	206Pb/		207Pb/		207Pb/
	Fraction	<Th> a	abs	238U b	abs	235U b	abs	206Pb b	abs	coef.	% disc c		U(ng)	U d	(magma) e	(pg) f	(pg) g	Pbc h		204Pb i	206Pb j	238U j	±2σ %	235U j	±2σ %	206Pb j	±2σ %
	Zircon
	z7	166.85	0.179224	166.772	0.179351	168.083	1.29297	186.587	17.5059	0.786673	10.62		0.0646033	0.538861	2.05	1.77882	0.0968703	18.3629		1112.78	0.171177	0.026208	0.10894	0.180026	0.834671	0.0498419	0.751286
	z5	166.998	0.205465	166.92	0.205551	166.515	1.25372	160.763	17.647	0.553658	-3.8297		0.128956	0.561598	2.13	3.57351	0.365335	9.78147		598.011	0.178399	0.0262316	0.124745	0.178205	0.81634	0.0492933	0.753764
	z14	167.212	0.094021	167.134	0.0940594	167.323	0.39084	169.99	4.98167	0.758987	1.68004		0.354489	0.632935	2.4	10.0207	0.263244	38.0661		2233.35	0.201058	0.0262657	0.0570105	0.179143	0.253359	0.0494883	0.210874
	z150	167.249	0.0476611	167.17	0.0476679	167.352	0.107056	169.92	1.26051	0.682277	1.61799		1.90406	0.481576	1.83	51.7491	0.119824	431.875		26164.2	0.152977	0.0262715	0.0288859	0.179177	0.069387	0.0494868	0.0432055
	z13	167.263	0.0871849	167.184	0.0872113	167.366	0.24994	169.93	2.89387	0.798637	1.61565		0.607148	0.7462	2.83	17.6659	0.100114	176.458		9997.65	0.237037	0.0262737	0.0528441	0.179193	0.161983	0.0494871	0.11963
	z12A	167.287	0.0950111	167.209	0.0950433	167.398	0.274982	170.071	3.3491	0.706252	1.68301		0.762083	0.569211	2.16	21.2006	0.383939	55.2187		3284.83	0.180814	0.0262776	0.0575814	0.17923	0.178181	0.04949	0.139731
	z171	167.308	0.047706	167.23	0.0477186	167.44	0.113782	170.408	1.55235	0.433792	1.86493		1.52494	0.634511	2.4	43.1496	0.153029	281.969		16420.5	0.201557	0.0262809	0.0289065	0.179279	0.0737108	0.0494972	0.0580778
	z15	167.309	0.0879983	167.231	0.0880252	167.183	0.297966	166.504	3.83713	0.642275	-0.436419		0.306983	0.7444	2.83	8.93013	0.0981903	90.9472		5164.19	0.236464	0.0262811	0.0533226	0.178981	0.193302	0.0494145	0.161002
	z181	167.393	0.0522689	167.314	0.0522741	167.586	0.110816	171.428	1.28262	0.688975	2.39931		1.88082	0.772361	2.93	55.1263	0.14098	391.023		21988.7	0.245345	0.0262944	0.0316502	0.179449	0.0717314	0.0495188	0.0444015
	z11	167.44	0.104719	167.362	0.104745	167.778	0.399716	173.659	5.29221	0.59157	3.62642		0.736237	0.769586	2.92	21.571	0.634885	33.9762		1928.39	0.244463	0.0263019	0.0634021	0.179672	0.258465	0.0495662	0.224474
	z136	167.446	0.0729904	167.367	0.072994	167.682	0.165181	172.119	2.07715	0.577485	2.76035		4.0223	0.447047	1.697	108.448	1.5305	70.8574		4347.53	0.142007	0.0263028	0.0441817	0.17956	0.106866	0.0495335	0.0828971
	zB	167.908	0.0955769	167.83	0.0955988	167.82	0.293131	167.679	3.77749	0.598631	-0.0900299		0.404817	0.900179	3.4	12.2774	0.194103	63.2517		3463.44	0.285938	0.0263765	0.0577063	0.179721	0.189501	0.0494394	0.158427
	LH24S
		Dates (Ma)											Composition							Isotopic Ratios
		206Pb/
		238U	±2σ	206Pb/	±2σ	207Pb/	±2σ	207Pb/	±2σ	Corr.			mass	Th/	Th/U	Pb*	Pbc	Pb*/		206Pb/	208Pb/	206Pb/		207Pb/		207Pb/
	Fraction	<Th> a	abs	238U b	abs	235U b	abs	206Pb b	abs	coef.	% disc c		U(ng)	U d	(magma) e	(pg) f	(pg) g	Pbc h		204Pb i	206Pb j	238U j	±2σ %	235U j	±2σ %	206Pb j	±2σ %
	Zircon
	Z2B	167.322	0.0951932	167.244	0.0952193	167.736	0.290218	174.682	3.56321	0.703581	4.25841		0.86127	0.55075	2.09	23.8518	0.416923	57.209		3418.65	0.17495	0.0262831	0.0576762	0.179623	0.187706	0.0495879	0.149254
	z4	167.336	0.0833075	167.257	0.0833324	167.584	0.21027	172.193	2.34724	0.797756	2.86635		0.612829	0.464316	1.762	16.5885	0.159407	104.064		6347.08	0.147493	0.0262853	0.050472	0.179446	0.136111	0.049535	0.0952032
	z7	167.349	0.0809963	167.27	0.0810207	167.694	0.199633	173.673	2.31409	0.730002	3.6864		0.966434	0.605154	2.297	27.1488	0.208031	130.504		7666.66	0.192231	0.0262874	0.0490681	0.179574	0.129147	0.0495665	0.0937305
	z2A	167.42	0.0835413	167.341	0.08357	167.51	0.270669	169.903	3.28568	0.76025	1.50755		0.493066	0.576231	2.187	13.7528	0.122487	112.279		6648.45	0.183043	0.0262987	0.0505909	0.179361	0.175278	0.0494865	0.13693
	z5	167.436	0.135012	167.358	0.135043	167.488	0.462292	169.322	5.24135	0.938822	1.16004		1.53626	0.95674	3.63	47.0904	1.45387	32.3898		1758.73	0.303913	0.0263013	0.0817428	0.179334	0.299405	0.0494742	0.222086
	z1	167.617	0.0954393	167.539	0.095473	167.89	0.387171	172.85	4.67396	0.893962	3.07294		0.519719	0.68622	2.604	14.929	0.21148	70.593		4070.77	0.217979	0.0263301	0.0577294	0.179802	0.2502	0.049549	0.197633
	z6	167.7	0.0836103	167.622	0.0836338	167.817	0.219934	170.574	2.50389	0.784102	1.73065		1.59248	0.489285	1.86	43.4889	0.250822	173.385		10493.4	0.155422	0.0263433	0.0505459	0.179717	0.142184	0.0495007	0.102234
	z8	167.796	0.107361	167.717	0.107387	167.845	0.299397	169.647	3.58111	0.722637	1.13714		0.31208	0.450862	1.711	8.44026	0.143271	58.9112		3614.09	0.143216	0.0263586	0.0648651	0.17975	0.193526	0.049481	0.149894
	z3	168.218	0.0817005	168.139	0.081723	168.385	0.203323	171.837	2.31089	0.759004	2.15182		0.830935	0.580909	2.205	23.3177	0.192439	121.169		7164.53	0.18452	0.0264258	0.0492409	0.180377	0.131038	0.0495275	0.0935501
	AM63A
		Dates (Ma)											Composition							Isotopic Ratios
		206Pb/
		238U	±2σ	206Pb/	±2σ	207Pb/	±2σ	207Pb/	±2σ	Corr.			mass	Th/	Th/U	Pb*	Pbc	Pb*/		206Pb/	208Pb/	206Pb/		207Pb/		207Pb/
	Fraction	<Th> a	abs	238U b	abs	235U b	abs	206Pb b	abs	coef.	% disc c		U(ng)	U d	(magma) e	(pg) f	(pg) g	Pbc h		204Pb i	206Pb j	238U j	±2σ %	235U j	±2σ %	206Pb j	±2σ %
	Zircon
	z9B	167.221	0.0879155	167.143	0.0879448	167.254	0.265337	168.822	3.23364	0.723939	0.994275		0.352017	0.575845	2.185	9.80566	0.144289	67.9584		4031.66	0.182922	0.0262671	0.0533015	0.179063	0.172067	0.0494636	0.134617
	z10	167.25	0.0830658	167.172	0.0830849	167.553	0.18441	172.939	2.29874	0.589517	3.33483		0.499761	0.869315	3.299	14.9863	0.127858	117.211		6449.59	0.276145	0.0262717	0.0503476	0.17941	0.119391	0.0495509	0.0930302
	z9A	167.286	0.0838956	167.208	0.0839201	167.648	0.232835	173.865	2.76559	0.733473	3.82906		0.658929	0.631199	2.396	18.6278	0.119141	156.351		9120.38	0.200505	0.0262775	0.0508427	0.179521	0.150664	0.0495706	0.114019
	z6	167.289	0.104085	167.21	0.104131	167.65	0.436559	173.863	5.53186	0.77367	3.82642		0.425205	0.449184	1.705	11.4602	0.273772	41.8605		2574.25	0.142687	0.0262778	0.0630865	0.179523	0.282487	0.0495705	0.234854
	z7	167.384	0.0941387	167.305	0.0941771	167.639	0.330779	172.356	4.14754	0.716588	2.93036		0.652953	0.545294	2.069	18.0629	0.157562	114.64		6842.42	0.173216	0.026293	0.0570242	0.179511	0.214052	0.0495385	0.174726
	z5	167.541	0.0867246	167.463	0.0867486	168.078	0.369631	176.742	5.11549	0.462424	5.25019		0.424083	0.515237	1.955	11.6512	0.207994	56.017		3378.89	0.163667	0.026318	0.0524775	0.18002	0.23862	0.0496317	0.216945
	z4	167.638	0.0819046	167.559	0.0819248	167.899	0.319765	172.684	4.60844	0.30097	2.96746		0.39512	0.594117	2.255	11.0872	0.306202	36.2087		2146.31	0.188722	0.0263334	0.0495312	0.179812	0.206631	0.0495455	0.194787
	z8	167.895	0.0997418	167.817	0.0997645	167.977	0.248736	170.233	2.83045	0.76195	1.41903		0.790559	0.683501	2.594	22.7304	0.284487	79.8996		4608.42	0.217112	0.0263744	0.0602256	0.179903	0.160663	0.0494935	0.116822
	AM13BAP
		Dates (Ma)											Composition							Isotopic Ratios
		206Pb/
		238U	±2σ	206Pb/	±2σ	207Pb/	±2σ	207Pb/	±2σ	Corr.			mass	Th/	Th/U	Pb*	Pbc	Pb*/		206Pb/	208Pb/	206Pb/		207Pb/		207Pb/
	Fraction	<Th> a	abs	238U b	abs	235U b	abs	206Pb b	abs	coef.	% disc c		U(ng)	U d	(magma) e	(pg) f	(pg) g	Pbc h		204Pb i	206Pb j	238U j	±2σ %	235U j	±2σ %	206Pb j	±2σ %
	Zircon
	z7	167.003	0.159031	166.925	0.159118	167.428	1.2314	174.543	17.6727	0.467391	4.36462		0.0701307	0.468665	1.779	1.89681	0.236851	8.00846		504.572	0.148877	0.0262324	0.096563	0.179265	0.797784	0.049585	0.756785
	z3	167.015	0.0814709	166.937	0.0814943	167.19	0.181497	170.777	1.84109	0.866442	2.2485		1.33015	0.834267	3.166	39.492	0.174016	226.945		12577.5	0.265015	0.0262343	0.0494523	0.178989	0.11774	0.049505	0.0719109
	z2	167.079	0.107349	167.001	0.107392	167.281	0.49126	171.241	6.5062	0.675495	2.47605		0.214664	0.619567	2.347	6.0426	0.187752	32.1839		1897.42	0.196812	0.0262445	0.0651425	0.179094	0.318528	0.0495149	0.27681
	z6	167.137	0.16992	167.059	0.170274	167.548	1.05822	174.458	14.7175	0.580681	4.24092		0.232263	0.128466	0.488	5.71545	0.669008	8.54318		588.957	0.0408085	0.0262538	0.103251	0.179404	0.685132	0.0495831	0.629972
	z8	167.245	0.0950354	167.167	0.0950608	167.053	0.292655	165.444	3.67575	0.670524	-1.04088		0.470806	0.510342	1.937	12.8925	0.191847	67.2017		4055.94	0.162114	0.0262709	0.0576064	0.17883	0.189993	0.0493921	0.153919
	z10	167.4	0.153864	167.321	0.153936	167.866	1.17718	175.555	16.9015	0.441118	4.68994		0.102707	0.490428	1.863	2.80082	0.352438	7.94697		498.038	0.155787	0.0262955	0.0931996	0.179774	0.760822	0.0496065	0.723831
	z9	167.653	0.0844742	167.574	0.0844981	167.737	0.245699	170.03	3.11579	0.619444	1.44429		0.405086	0.543131	2.06	11.2175	0.189768	59.1114		3539.04	0.172526	0.0263358	0.0510825	0.179624	0.158911	0.0494892	0.129453
	z1	168.011	0.0851517	167.932	0.0851768	168.34	0.274244	174.076	3.4867	0.636522	3.52915		0.428267	0.654907	2.486	12.234	0.215575	56.7505		3302	0.208028	0.0263928	0.0513844	0.180325	0.176788	0.049575	0.145886
	z12	168.421	0.0920202	168.343	0.0920622	168.801	0.363264	175.232	4.60222	0.722924	3.93143		0.258888	0.409449	1.553	6.95062	0.231944	29.9668		1867.69	0.130056	0.0264581	0.0554046	0.180861	0.233586	0.0495996	0.19461
	AC25
		Dates (Ma)											Composition							Isotopic Ratios
		206Pb/
		238U	±2σ	206Pb/	±2σ	207Pb/	±2σ	207Pb/	±2σ	Corr.			mass	Th/	Th/U	Pb*	Pbc	Pb*/		206Pb/	208Pb/	206Pb/		207Pb/		207Pb/
	Fraction	<Th> a	abs	238U b	abs	235U b	abs	206Pb b	abs	coef.	% disc c		U(ng)	U d	(magma) e	(pg) f	(pg) g	Pbc h		204Pb i	206Pb j	238U j	±2σ %	235U j	±2σ %	206Pb j	±2σ %
	Zircon
	z8	167.394	0.107734	167.316	0.107779	167.69	0.644164	172.972	9.0441	0.510111	3.26993		0.147121	0.579469	2.199	4.1066	0.25376	16.183		972.89	0.184072	0.0262947	0.0652559	0.17957	0.416732	0.0495516	0.386177
	z12	167.41	0.0955365	167.332	0.0955815	167.676	0.330344	172.536	3.9638	0.816069	3.01639		0.564736	0.472517	1.793	15.3272	0.314857	48.68		2972.23	0.150098	0.0262972	0.0578655	0.179553	0.213728	0.0495423	0.166719
	z11	167.411	0.0824565	167.332	0.0824864	167.541	0.270246	170.492	3.31274	0.742701	1.85311		0.843452	0.606832	2.3	23.7119	0.435092	54.4986		3210.95	0.192763	0.0262973	0.0499375	0.179397	0.174975	0.049499	0.138143
	z10	167.451	0.084763	167.372	0.0847944	167.686	0.328362	172.121	4.3335	0.60965	2.75902		0.471663	0.580526	2.203	13.1735	0.421467	31.2562		1861.72	0.184407	0.0263036	0.0513227	0.179565	0.212434	0.0495335	0.182815
	z9	167.459	0.0869922	167.38	0.0870278	167.637	0.345026	171.266	4.52633	0.639154	2.26895		0.783718	0.473997	1.799	21.2847	0.622162	34.2109		2093.4	0.150567	0.0263049	0.052672	0.179508	0.223274	0.0495154	0.191168
	z6	167.534	0.185175	167.456	0.185205	167.91	1.69103	174.32	24.7161	0.344359	3.93779		0.0620731	1.17075	4.44	2.00031	0.29882	6.69402		360.486	0.371892	0.0263169	0.112042	0.179825	1.09267	0.0495802	1.05883
	z7	167.663	0.221745	167.585	0.221824	167.985	1.31006	173.635	17.7184	0.693626	3.48446		0.07125	0.950727	3.6	2.18403	0.158204	13.8052		760.999	0.301999	0.0263374	0.134093	0.179913	0.846151	0.0495657	0.75862
	z5	167.796	0.102194	167.717	0.102231	168.022	0.375765	172.311	4.71079	0.732769	2.66569		0.13575	0.622981	2.36	3.84126	0.0555512	69.1481		4052.3	0.197889	0.0263586	0.061751	0.179955	0.242654	0.0495375	0.199217
	z1	167.952	0.0905235	167.873	0.0905603	168.38	0.343491	175.505	4.42973	0.658526	4.34838		0.225136	0.640462	2.431	6.40551	0.0781574	81.9565		4777.95	0.20344	0.0263834	0.0546511	0.180371	0.22138	0.0496054	0.18712
	z2	167.999	0.0839235	167.921	0.0839447	168.199	0.269909	172.111	3.78919	0.370352	2.43471		0.282563	0.886022	3.363	8.54582	0.069201	123.493		6767.21	0.281441	0.026391	0.0506445	0.180161	0.174128	0.0495333	0.159079
	z6B	168.113	0.150265	168.035	0.150312	168.497	0.769396	175.004	10.1661	0.711348	3.98228		0.0997503	0.820172	3.11	2.97125	0.113285	26.228		1474.5	0.260522	0.0264091	0.090624	0.180508	0.495556	0.0495947	0.434568
	BS16
		Dates (Ma)											Composition							Isotopic Ratios
		206Pb/
		238U	±2σ	206Pb/	±2σ	207Pb/	±2σ	207Pb/	±2σ	Corr.			mass	Th/	Th/U	Pb*	Pbc	Pb*/		206Pb/	208Pb/	206Pb/		207Pb/		207Pb/
	Fraction	<Th> a	abs	238U b	abs	235U b	abs	206Pb b	abs	coef.	% disc c		U(ng)	U d	(magma) e	(pg) f	(pg) g	Pbc h		204Pb i	206Pb j	238U j	±2σ %	235U j	±2σ %	206Pb j	±2σ %
	Zircon
	z3987	166.197	0.168138	166.118	0.1647	166.376	0.21377	170.047	2.18053	0.742329	2.31046		2.57998	0.436102	1.655	68.8293	0.381259	180.531		11081.6	0.138539	0.026104	0.100429	0.178044	0.1393	0.0494895	0.0875859
	z3995B	166.272	0.181475	166.194	0.177223	166.322	0.476293	168.144	5.02114	0.922117	1.15959		0.779478	0.374844	1.423	20.4604	0.343247	59.6084		3732.54	0.119079	0.026116	0.108017	0.177981	0.310462	0.0494492	0.212505
	z3937B	166.281	0.0792814	166.202	0.0723108	166.511	0.160508	170.906	2.00522	0.595803	2.75192		2.67595	0.45367	1.722	71.7657	0.893664	80.305		4916.13	0.14412	0.0261174	0.044071	0.178201	0.104515	0.0495077	0.0795474
	z3919	166.348	0.124125	166.27	0.118401	166.629	0.172177	171.737	1.83711	0.715332	3.18329		1.93278	0.395707	1.502	51.0502	0.344394	148.232		9201.9	0.125706	0.0261281	0.0721324	0.178338	0.112039	0.0495254	0.0717259
	z3894	166.423	0.0748001	166.345	0.0649186	166.568	0.148075	169.732	1.83087	0.617561	1.99529		2.03309	0.396711	1.506	53.737	0.202568	265.279		16449.8	0.126024	0.0261401	0.0395321	0.178266	0.0963889	0.0494829	0.0714009
	z3945B	166.464	0.070988	166.386	0.0641103	166.705	0.251347	171.241	3.23031	0.713463	2.83532		1.28109	0.483056	1.833	34.667	0.235502	147.205		8926.27	0.153453	0.0261466	0.0390305	0.178426	0.163489	0.0495149	0.134527
	z3945A	166.624	0.0696682	166.546	0.0650991	166.622	0.213844	167.704	2.74527	0.646319	0.690748		0.548855	0.594273	2.255	15.3061	0.211454	72.3852		4272.8	0.188782	0.0261721	0.0395949	0.178329	0.139159	0.0494399	0.112966
	BS1
		Dates (Ma)											Composition							Isotopic Ratios
		206Pb/
		238U	±2σ	206Pb/	±2σ	207Pb/	±2σ	207Pb/	±2σ	Corr.			mass	Th/	Th/U	Pb*	Pbc	Pb*/		206Pb/	208Pb/	206Pb/		207Pb/		207Pb/
	Fraction	<Th> a	abs	238U b	abs	235U b	abs	206Pb b	abs	coef.	% disc c		U(ng)	U d	(magma) e	(pg) f	(pg) g	Pbc h		204Pb i	206Pb j	238U j	±2σ %	235U j	±2σ %	206Pb j	±2σ %
	Zircon
	z2	168.226	0.145984	168.147	0.144681	168.349	0.613171	171.179	8.39443	0.501114	1.77109		0.111384	0.750172	2.847	3.26306	0.102545	31.8207		1815.91	0.238285	0.026427	0.0871714	0.180335	0.395255	0.0495135	0.358115
	z11	168.241	0.143782	168.163	0.143249	168.881	0.669835	178.954	9.16174	0.516115	6.03018		0.287391	1.17687	4.467	9.31417	0.448304	20.7765		1079.25	0.373821	0.0264295	0.0863005	0.180954	0.430529	0.0496788	0.391668
	z4	168.33	0.131327	168.252	0.129716	168.297	0.423115	168.931	5.6502	0.516289	0.401699		0.506282	0.714524	2.712	14.7091	0.566891	25.9469		1497.22	0.226961	0.0264437	0.0781067	0.180275	0.27282	0.0494659	0.239752
	z6	168.336	0.110098	168.257	0.108261	168.575	0.5184	173.032	6.60053	0.819264	2.75907		0.137518	0.729424	2.768	4.01066	0.0774182	51.8052		2960.09	0.231693	0.0264446	0.065186	0.180598	0.333753	0.0495528	0.280972
	z8	168.371	0.0961056	168.293	0.0939284	168.32	0.263374	168.695	3.71094	0.353326	0.238242		0.407837	0.724883	2.751	11.8826	0.221529	53.6391		3067.92	0.23025	0.0264502	0.0565441	0.180301	0.1698	0.0494609	0.155555
	a Corrected for initial Th/U disequilibrium using radiogenic 208Pb and Th/U[magma] specified.
	b Isotopic dates calculated using the decay constants λ238 = 1.5512500000E-10 and λ235 = 9.8485000000E-10 (Jaffey et al. 1971).
	c % discordance = 100 - (100 * (206Pb/238U date) / (207Pb/206Pb date))
	d Th contents calculated from radiogenic 208Pb and the 230Th-corrected 206Pb/238U date of the sample, assuming concordance between the U-Pb and Th-Pb systems.
	e Th/U ratio of magma from which mineral crystallized.
	f Total mass of radiogenic Pb.
	g Total mass of common Pb.
	h Ratio of radiogenic Pb (including 208Pb) to common Pb.
	i Measured ratio corrected for fractionation and spike contribution only.
	j Measured ratios corrected for fractionation, tracer and blank.

## Sheet: Zircon WM interpretation
	Sample	Youngest date	2 s	Tracer and Analytical 2 s	Total Uncertainty 2s	Youngest n=3	2 sig	MSWD	Rejected younger	Tracer and Analytical 2 s	Total Uncertainty 2s	Youngest population n>3	2 sig	MSWD	n=	Rejected younger	Tracer and Analytical 2 s	Total Uncertainty 2s
	BH10	169.039	0.081	0.11	0.21	169.098	0.046	2.1	0	0.086	0.2	169.116	0.041	2.4	4	0	0.084	0.2
	MA9	167.511	0.085	0.11	0.21	167.553	0.055	0.94	0	0.092	0.2	167.59	0.044	1.6	5	0	0.086	0.2
	AM72	168.33	0.13	0.15	0.23	168.345	0.085	0.088	0	0.11	0.21	168.433	0.047	1.3	7	0	0.089	0.2
	AMQMD4	167.48	0.2	0.21	0.27	167.499	0.072	0.22	0	0.099	0.2	167.58	0.042	1.8	8	0	0.083	0.2
	AMLHG18 * youngest 2 rejected	167.212	0.094	0.065	0.19	167.245	0.038	0.33	*0	0.055	0.19	167.275	0.027	1.1	6	*0	0.055	0.19
	LH24S	167.322	0.095	0.12	0.22	167.337	0.05	0.091	0	0.087	0.2	167.365	0.041	1.1	5	0	0.083	0.2
	AM63A	167.221	0.088	0.11	0.21	167.254	0.049	0.58	0	0.088	0.2	167.282	0.04	1.8	5	0	0.83	0.2
	AM13BAP	167	0.16	0.19	0.26	167.033	0.06	0.54	0	0.95	0.2	167.045	0.057	0.81	4	0	0.93	0.2
	AM22	167.29	0.048	0.065	0.19	167.437	0.058	2.5	1	0.096	0.2	N/A	N/A	N/A	N/A	N/A
	AC25	167.39	0.11	0.13	0.22	167.407	0.054	0.034	0	0.091	0.2	167.44	0.039	1.2	7	0	0.083	0.2
	JPF	168.23	0.15	0.17	0.25	168.27	0.081	0.69	0	0.081	0.21	168.318	0.054	1	5	0	0.079	0.2
	BS16	166.2	0.17	0.17	0.25	166.266	0.067	0.41	0	0.8	0.19	166.285	0.059	0.73	4	0	0.073	0.19

## Sheet: Molybdenite samples & results
	Details of samples used and synopsis of the Re-Os data for molybdenite. Sample photographs in Figure S5.
			Decription	Drill hole	From	To	Sample	wt (g)		Re (ppm)	±	187Re (ppm)	±	187Os (ppb)	±	Age (Ma)	±^	±*	±#
	AC21MP	Mo paint vein	Mason drill core: Mo paint vein cutting LHG.	EG-AM-10-003	692.45 m	692.60 m	RO1151-1_AC21MP-A	0.02247		1104.71	4.00998	694.329	2.52035	1932	5.8849	166.787	0.0756311	0.669575	0.846703
							RO1153-1_AC21MP-B	0.02111		1252.86	4.61874	787.448	2.90297	2185.88	6.83246	166.39	0.0863187	0.669293	0.845726
							RO1153-2_AC21MP-C	0.02001		1109.63	4.15351	697.424	2.61056	1940.52	6.17257	166.78	0.0793247	0.669972	0.847004
							RO1149-8_AC21MP-D	0.02338		1329.71	4.78177	835.746	3.00543	2317.19	6.96492	166.192	0.0744786	0.667101	0.843612
	AC12	Cpy-Mo-Qtz vein	Mason drill core: Cpy-Mo-Qtz vein cutting LHG	EG-AM-10-003	734.00 m	734.05 m	RO1149-9_AC12	0.02173		177.636	0.652841	111.648	0.410322	310.491	0.957506	166.695	0.0931002	0.671762	0.848264
							^uncertainty including only mass spectrometry uncertainty
							*uncertainty including all sources of analytical uncertainty
							#uncertainty including all sources of analytical uncertainty plus decay constant
